# Supplementary material
Source: publisher figshare collection journal article supplement (https://acs.figshare.com/ndownloader/files/25912258)
Supplement: Supplementary file 1 [file 25912258]

## Sheet: Differentially Expressed Gene
gene_id	B49_1	B49_2	B49_3	B63_1	B63_2	B63_3	B77_1	B77_2	B77_3	B91_1	B91_2	B91_3	B105_1	B105_2	B105_3	B119_1	B119_2	B119_3	B133_1	B133_2	B133_3	B147_1	B147_2	B147_3	B49	B63	B77	B91	B105	B119	B133	B147	Cold_9	CT_9	Hot_9	Br_6	P1	P5	P9	P13	P17	S1	S2	S3	S4	S5	B3	B6	module
JreChr01G10001	2.65475	1.79438	2.21735	26.9458	20.4232	17.8359	23.7463	24.2902	23.7773	96.2328	59.5379	73.2925	73.0733	55.7142	71.7023	90.676	64.7965	91.8368	17.0403	95.3069	40.2791	1.78333	3.46163	7.57421	2.22216	21.735	23.9379	76.3544	66.83	82.4365	50.8754	4.27306	14.9974	40.0907	31.9487	29.9308	0.539762	6.61483	10.0019	12.2048	2.21813	0.023018	0.00290267	0.00911333	0.225516	0.0431123	1.95932	55.0323	green
JreChr01G10006	13.869	10.6865	8.00411	3.91344	4.22031	4.0815	2.7529	2.81048	3.35993	2.63849	2.5623	2.94907	2.99766	4.25525	4.15652	7.9056	5.97123	6.89696	15.2345	8.85708	14.4099	27.2525	24.3649	9.33322	10.8532	4.07175	2.97444	2.71662	3.80314	6.9246	12.8338	20.3169	11.5587	10.3712	5.18092	5.92199	9.68154	5.17874	2.26048	5.03413	15.3291	8.75625	8.88765	11.8465	8.0861	4.28619	9.69867	3.13507	blue
JreChr01G10028	0.715139	0.029881	0.007302	0	0.12302	0.010831	0.03679	0	0	0	0.010508	0	0.156316	0.001201	0	0.368225	0.523807	0.003209	1.71046	0.360667	0.003887	1.00505	0.013659	18.6985	0.250774	0.044617	0.0122633	0.00350267	0.0525057	0.298414	0.691672	6.57242	1.29525	0.006708	0.008467	0.000919	0.00766233	0.519662	1.31816	17.7207	395.51	0	0	0.000219667	0.00163167	0.000403333	0.615217	0.000959667	blue
JreChr01G10036	103.794	94.7919	85.5663	26.8796	29.8138	32.2782	17.2689	20.2618	15.4372	17.5515	20.377	25.5011	17.3972	22.1305	16.5798	46.3922	29.3222	45.1691	88.727	55.6779	110.458	91.8613	96.2066	112.318	94.7174	29.6572	17.656	21.1432	18.7025	40.2945	84.9543	100.129	62.7078	44.4815	20.3294	28.2391	93.6551	124.344	65.0382	56.7883	128.474	78.679	80.9593	79.169	48.101	26.3412	93.8267	18.71	blue
JreChr01G10052	8.33955	2.34869	2.11416	0.634151	0.005734	0.923815	0.004277	0.00594	0.003459	0.003265	0.016098	0.006667	0.002736	0.002131	0.004937	0.009656	0.001038	0.000619	0.008704	0.001792	0.002171	0.002436	0.001694	0.002661	4.26747	0.521233	0.00455867	0.00867667	0.003268	0.003771	0.00422233	0.00226367	0.002502	0.003072	0.15792	0.003334	4.10149	3.24923	1.46286	0.889868	0.347962	4.71242	3.54339	3.24414	2.47361	0.0581677	2.62793	0.00185067	turquoise
JreChr01G10067	14.8661	11.6122	12.639	6.57131	8.28875	7.77231	5.28753	5.42521	6.07107	3.74282	3.72406	3.38056	5.53318	4.8234	4.31564	6.21925	5.38245	5.87061	6.30747	8.68558	11.0041	10.9242	10.56	7.11499	13.0391	7.54412	5.5946	3.61582	4.89074	5.8241	8.66572	9.53307	11.0743	7.62353	1.04445	10.3985	15.6869	12.4888	12.9938	12.8519	15.2708	9.00074	9.48574	9.38513	8.68989	12.5712	13.3123	5.09662	turquoise
JreChr01G10069	6.00446	4.50389	4.99231	1.35967	1.73681	2.23752	1.39186	1.02357	0.492955	0.179185	0.059541	0.022761	0.674533	0.937261	0.03529	0.393196	0.049237	0.503623	0.34235	0.889421	0.820411	0.029566	0.536716	0.167379	5.16689	1.778	0.96946	0.0871623	0.549028	0.315352	0.684061	0.244554	1.26819	0.170482	0.017429	0.517588	23.4194	15.6871	16.8848	15.899	12.9139	28.6917	30.0915	29.4266	22.9184	20.9105	5.32135	0.064342	turquoise
JreChr01G10075	3.18253	9.91601	10.1032	9.21077	0.477606	11.248	7.19111	1.51754	0.232608	1.34849	2.36893	3.71492	2.20178	2.43983	3.71881	0.674741	0.503804	0.990049	1.42673	0.363223	3.42926	0.591686	3.15998	0.522095	7.7339	6.97881	2.98042	2.47745	2.78681	0.722865	1.73974	1.42459	1.34053	1.40432	4.44412	9.21493	9.48608	10.7769	5.55428	4.46805	7.74118	7.92133	8.15519	5.10662	11.7113	6.52673	9.92477	3.88301	turquoise
JreChr01G10082	58.7271	53.7741	54.7863	19.8414	29.3728	24.4279	49.5479	31.7687	30.4654	20.7879	17.6898	12.7125	19.4546	23.477	19.0472	32.6555	28.7787	25.8404	33.3622	27.9651	37.5731	18.7146	28.6724	21.3699	55.7625	24.5473	37.2607	17.0634	20.6596	29.0916	32.9668	22.919	68.5482	43.4147	17.2077	29.933	17.9936	49.8285	58.9881	78.7197	85.3206	67.9779	32.2186	55.1167	66.6557	95.3343	59.9664	19.3495	turquoise
JreChr01G10097	25.1081	33.254	29.7736	10.4175	11.9249	16.807	9.75311	8.91822	10.5199	3.96461	3.17345	3.79285	3.49315	5.8709	2.97012	7.07826	4.15603	6.2046	5.74716	4.47752	6.44723	5.90043	5.58636	4.77783	29.3786	13.0498	9.7304	3.64363	4.11139	5.81296	5.55731	5.42154	6.13068	7.49688	4.67151	9.34052	31.4466	6.54446	3.70089	4.4141	1.95544	20.0423	14.5137	10.4199	5.80809	2.95487	26.8608	5.41868	turquoise
JreChr01G10104	3.79444	5.55922	5.58439	4.81757	5.52999	5.91902	2.35791	2.51819	1.10355	0.984109	1.08433	1.39775	1.34453	0.830831	0.734387	3.24965	2.17953	2.82888	1.2657	1.54743	1.06391	1.19978	1.20164	0.017923	4.97935	5.4222	1.99322	1.1554	0.969917	2.75269	1.29235	0.806448	3.07984	1.70691	0.806527	3.14575	6.37239	11.951	10.5152	10.7189	3.35846	2.90517	0.820534	0.16875	0.847498	0.205787	5.54424	1.04797	turquoise
JreChr01G10120	4.68891	3.72017	2.9842	1.34349	1.02701	1.2717	1.10014	1.24564	0.734144	1.00952	1.13504	1.06128	0.106161	0.764481	0.712617	1.27137	0.967083	1.00512	0.003192	0.688955	0.470689	0.553548	0.007836	1.01277	3.79776	1.21407	1.02664	1.06861	0.527753	1.08119	0.387612	0.52472	0.879079	1.18331	0.012825	1.84867	4.59129	3.72498	4.0334	2.78749	0.688604	3.15343	3.57797	2.84889	1.99967	2.34489	3.24853	0.655008	turquoise
JreChr01G10128	0.088925	0	0.105968	8.27316	3.12253	2.75267	46.0295	36.261	39.0594	22.4779	42.6515	43.2589	46.6651	54.0962	46.2589	29.5161	42.3844	26.4407	75.4239	67.8346	83.5708	93.6365	99.3925	139.467	0.0649643	4.71612	40.45	36.1294	49.0067	32.7804	75.6098	110.832	28.8488	44.5796	51.6623	22.2762	1.19748	9.93505	39.3652	57.6324	51.1625	2.40655	5.39548	5.22067	6.79323	2.53939	0.344893	58.3281	blue
JreChr01G10146	9.7136	6.44294	7.96303	12.4116	10.9474	9.96275	15.0983	13.0419	9.9382	7.02605	8.93961	10.5428	14.0052	10.6772	11.4039	20.5494	18.4531	18.1264	41.7765	29.412	44.1432	24.8767	10.7531	57.3285	8.03986	11.1073	12.6928	8.83615	12.0288	19.043	38.4439	30.9861	40.3272	31.3337	43.8452	11.0205	7.22226	23.3435	10.3529	16.9211	18.2499	8.63954	12.0831	8.96657	11.9393	11.7704	7.15521	20.7374	blue
JreChr01G10148	14.9495	9.94788	11.4802	6.5607	5.39717	6.65606	7.13001	7.95904	5.08678	5.3495	4.06601	2.79957	2.42822	2.75466	3.69999	6.10391	4.65778	4.64938	4.7169	6.6447	6.09969	5.37103	6.63082	2.92488	12.1259	6.20464	6.72528	4.07169	2.96096	5.13702	5.82043	4.97558	4.31703	3.13158	4.28676	4.76927	11.0376	10.8315	11.7497	10.8647	6.95783	9.93289	8.06699	8.11833	7.46095	10.6734	10.2308	3.80785	turquoise
JreChr01G10151	9.02863	15.1053	7.72819	3.2068	2.96828	1.83735	1.19453	2.34039	1.7773	2.10412	1.34004	1.60463	1.42658	2.13092	1.98707	1.68047	2.1274	1.81486	2.33027	1.66014	2.73932	1.81278	2.73842	1.24213	10.6207	2.67081	1.77074	1.68293	1.84819	1.87424	2.24324	1.93111	1.28492	0.449884	1.56369	3.75895	0.745706	0.356896	0.005641	0.0760853	0.0599143	1.18045	0.355806	0.264885	0.01244	0.002883	9.5277	0.939621	turquoise
JreChr01G10161	7.98241	7.46042	5.4568	0.006763	0.008883	0.427818	0.804312	0.412116	0.051803	0.132489	0.523551	0.081295	0.014649	0.038818	0.000579	0.756233	0.005364	0.101117	0.006026	0.039403	0.056353	0.006187	0.188213	0.202513	6.96655	0.147821	0.422744	0.245778	0.0180153	0.287571	0.0339273	0.132304	0.01596	0.004999	0.007145	0.061796	5.84569	1.32676	0.920933	0.201818	0.198165	2.20985	1.8798	3.14221	1.64551	0.754812	7.51238	0.0396687	turquoise
JreChr01G10168	143.415	119.911	138.936	162.457	140.312	183.577	102.681	117.827	139.024	135.816	115.864	135.264	170.722	159.846	174.307	183.16	246.937	278.685	135.282	200.939	127.93	35.3595	73.785	85.1514	134.087	162.115	119.844	128.982	168.292	236.261	154.717	64.7653	78.2359	109.26	224.228	178.139	107.119	109.753	70.0832	70.4811	44.931	69.6345	82.244	64.5417	56.0781	40.8085	178.36	92.093	yellow
JreChr01G10202	0	7.32426	4.59018	0	0	0	0	0	0	0	0	0	0	0	0	0	0	0	0	0	0	0	0	0	3.97148	0	0	0	0	0	0	0	0	0	0	0.163366	0.027902	0	0	0	0	0	0	0	0	0	0	0.0231523	turquoise
JreChr01G10233	4.78539	0.768438	5.42159	0.513804	0.659062	0.772574	0.596804	0.532073	0.062875	0.116661	0.023834	0.000685	0.261634	0.00095	0.007665	0.548899	0.167048	0.179422	0.000446	0.00136	0	0.002586	0	0.000948	3.65847	0.64848	0.397251	0.04706	0.090083	0.298456	0.000602	0.001178	0.009933	0.002251	0.00085	0.09854	6.56316	1.8013	0.926142	2.64059	0.280573	4.69819	5.24979	4.45983	1.30137	3.60701	5.03062	0.291718	turquoise
JreChr01G10257	13.9912	6.84806	5.3548	0.969715	0.926866	1.49981	1.45605	0.313233	1.10343	2.7286	3.86915	4.77633	2.65355	4.03576	3.50036	6.33456	5.29492	8.11878	24.7975	13.4679	17.8775	35.4153	35.1756	9.66809	8.73135	1.13213	0.95757	3.79136	3.39656	6.58275	18.7143	26.753	37.9607	26.5919	31.5374	0.883841	18.8794	14.4313	18.8428	23.6611	69.589	3.84984	4.93632	8.16456	8.7276	11.6685	8.43359	1.77619	blue
JreChr01G10260	33.8959	24.9474	28.7588	31.9352	28.9337	28.5083	17.653	18.0183	16.2184	47.9958	39.1164	47.3511	42.0501	46.1478	43.7882	41.6295	39.5487	48.0724	117.531	77.1273	110.123	111.26	101.834	105.455	29.2007	29.7924	17.2966	44.8211	43.9954	43.0835	101.594	106.183	47.3475	39.1669	56.411	21.3221	18.6296	26.3092	58.4904	49.4682	70.1565	12.8771	15.1353	11.2751	13.1689	21.8801	37.7285	36.7524	blue
JreChr01G10263	10.1181	7.72707	7.37181	0.344545	0.684681	0.545129	0.038593	0.118935	0.033766	0	0	0	0	0	0.06673	0.08899	0	0	0	0	0	0	0	0	8.40566	0.524785	0.0637647	0	0.0222433	0.0296633	0	0	0	0.070795	0	0.016486	12.2927	3.85911	0.00042	0.432022	0.002431	7.31674	0.0197857	0.144785	0.100013	0.00495167	6.05638	0.00930633	turquoise
JreChr01G10265	43.0289	30.0556	25.4934	0.279692	1.27903	7.54919	0.029374	0.961753	0.031748	0	0	0	0	0	0	0	0	0.008638	0	0	0	0	0	0	32.8593	3.03597	0.340958	0	0	0.00287933	0	0	0	0	0	0	22.7823	1.56421	0.0101277	0.010911	0	3.98099	1.55703	3.52583	1.36723	0.0506523	40.1193	0	turquoise
JreChr01G10273	23.3396	27.592	26.9925	5.94029	9.84358	6.66641	12.6403	14.6506	10.5132	10.8899	10.2963	8.72063	9.98175	11.4395	10.741	6.15112	10.5251	10.2059	8.22308	6.70804	9.9132	9.82231	10.8107	10.3532	25.9747	7.48343	12.6014	9.96894	10.7207	8.96071	8.28144	10.3287	10.0994	16.1249	8.22244	13.3649	13.7441	15.005	20.7943	12.5485	8.56996	11.2429	10.2457	9.98917	12.4269	12.7165	18.0048	8.48549	turquoise
JreChr01G10278	2.50588	3.02499	2.85345	0.08529	0.116193	0.104654	0.121798	0.074291	0.082464	0	0.079922	0.041246	0.278099	0	0	0	0	0.16986	0.513419	0.18598	0.309853	0.460401	0.50647	0.647499	2.79478	0.102046	0.092851	0.0403893	0.0926997	0.05662	0.336417	0.538123	2.90294	1.56998	0.461851	0.385915	49.3522	44.6881	17.3838	24.5003	47.9362	1.82013	1.49625	1.43899	1.17116	0.966211	1.06045	0.099189	turquoise
JreChr01G10279	20.4779	16.9293	18.2204	7.77483	10.7869	9.7033	7.05516	7.60583	7.03973	5.9023	6.40214	5.57731	6.4798	6.80527	5.14661	6.8214	6.6343	8.08367	9.8483	9.32706	13.6693	16.2638	19.668	12.7735	18.5425	9.42168	7.23357	5.96058	6.1439	7.17979	10.9482	16.2351	8.65141	9.933	5.83138	9.1947	13.9196	16.7534	16.7854	14.4906	12.725	13.0024	14.189	14.2458	14.9202	14.0641	17.2731	7.45578	brown
JreChr01G10284	27.5827	26.245	19.7982	14.3231	14.394	18.745	11.5746	10.4646	10.2412	8.10417	8.14171	8.27847	9.92048	7.67462	9.67466	15.3544	15.4188	15.866	15.637	14.8297	15.506	11.9833	10.7092	22.2189	24.542	15.8207	10.7601	8.17478	9.08992	15.5464	15.3243	14.9705	18.1919	16.2623	7.57741	15.5177	32.1792	22.2314	25.7867	23.5415	23.4354	24.8994	19.6074	23.1969	20.1214	16.4108	25.5568	8.35501	turquoise
JreChr01G10286	19.9254	16.9767	16.9549	5.79125	8.14124	7.6156	6.16678	5.32848	4.84943	4.10799	4.06531	3.93253	3.47168	3.58366	3.4616	6.56717	3.6419	6.23234	10.9545	6.94236	9.64229	9.52465	10.2931	10.1249	17.9523	7.1827	5.44823	4.03528	3.50565	5.48047	9.17972	9.98089	7.78269	7.44931	5.34733	7.40011	16.6866	10.1732	6.99067	7.94534	12.0273	32.1825	25.0984	24.8682	18.0529	15.4637	15.8411	4.22543	turquoise
JreChr01G10295	46.9956	39.3651	49.2759	28.6326	30.0302	26.3625	17.7918	27.8561	26.3817	24.4887	21.2851	26.6031	21.9369	21.7087	26.7522	37.4919	28.7518	38.5653	16.0029	20.1521	16.6688	12.425	11.9342	21.5001	45.2122	28.3418	24.0099	24.1256	23.4659	34.9363	17.6079	15.2864	28.3619	22.3184	33.8371	24.8241	47.9864	25.7332	23.4561	24.5647	17.8083	34.8039	37.7895	55.1124	58.9483	58.6783	46.2247	19.1236	turquoise
JreChr01G10296	15.6908	14.3154	15.5958	9.73119	11.5583	5.4083	7.47749	4.31226	3.64474	2.73008	2.26719	3.29315	2.20889	1.52057	3.6114	4.54352	4.73503	6.44182	6.34501	4.4852	10.2845	8.14399	5.03756	9.58963	15.2007	8.89925	5.14483	2.76347	2.44695	5.24012	7.03823	7.5904	7.18194	8.97179	1.95229	5.71527	14.3442	15.1875	14.4631	15.7971	13.0086	15.9053	10.3569	17.3298	11.3828	9.51777	18.343	2.04853	turquoise
JreChr01G10298	3.09966	0.707186	2.33915	0.033315	0.789459	0.502437	0.157214	0.403048	0.15319	6.38654	2.32146	1.99074	0.303996	0.244837	0.293774	9.95161	3.89555	9.83656	5.11836	2.44334	4.18076	13.4098	12.9436	12.8255	2.04866	0.441737	0.237817	3.56625	0.280869	7.89457	3.91415	13.0596	24.7071	8.70654	0.055047	0.654093	4.95024	5.92531	0.633463	1.0112	5.706	0.496223	1.18708	6.17797	3.48012	0.705159	3.07067	0.7511	blue
JreChr01G10302	61.742	113.668	106.117	4.81189	4.08448	4.11603	7.27673	6.51215	1.86679	5.52042	4.13167	2.86586	0.512293	0.3668	1.75426	7.13901	2.07708	6.57587	0.010403	1.03048	0.009555	0.003283	0.412688	0.006871	93.8421	4.33747	5.21856	4.17265	0.877785	5.26399	0.350145	0.140947	2.13544	2.66337	3.9358	5.55622	14.065	27.9096	14.1887	10.0474	2.90265	2.53046	0.114272	1.36856	2.91112	0.675163	97.9474	0.705857	turquoise
JreChr01G10304	0.110757	4.80163	6.05917	0.104346	0.064941	0.056208	0.119666	0.079848	0.114242	2.77227	3.15419	0.054133	3.51597	4.89418	0.066605	0.065035	0.099948	0.083166	0.105967	0.07109	0.069184	0.128347	0.104973	0.078793	3.65719	0.075165	0.104585	1.99353	2.82558	0.0827163	0.0820803	0.104038	2.86821	5.09734	0.083306	0.051454	0.109678	0.0858837	0.114618	0.0841983	2.49168	0.0772923	0.08513	2.78627	0.0796413	0.0846477	1.26564	1.78067	turquoise
JreChr01G10317	67.8848	74.7793	47.1466	26.3917	31.0927	32.2149	16.2641	21.6411	20.7102	14.0226	12.1768	16.9006	25.3163	18.3071	18.8979	28.4741	24.7359	31.2191	29.2998	24.6982	25.2044	27.5568	26.2404	36.9834	63.2702	29.8998	19.5385	14.3667	20.8404	28.143	26.4008	30.2602	22.4678	28.7363	24.0147	31.5554	51.3883	43.6169	55.2053	50.5272	39.4658	56.0445	59.3078	60.0602	54.5683	50.9465	52.0279	14.1813	turquoise
JreChr01G10321	17.4984	17.5025	14.4861	5.71101	6.98145	7.96	6.531	6.99004	4.85086	1.51206	0.46747	1.69552	1.62773	2.58189	1.66764	7.78167	5.50418	7.14542	6.03531	4.18526	7.93728	5.93309	7.57475	8.46467	16.4957	6.88415	6.12397	1.22502	1.95909	6.81042	6.05262	7.32417	11.8966	9.22977	3.97215	2.75911	8.71731	21.1383	28.1069	47.0206	53.2185	7.89241	16.4275	31.249	41.7844	30.502	14.37	1.33299	turquoise
JreChr01G10323	80.6582	77.3904	63.2985	41.9287	41.9573	52.4696	19.7019	23.0071	24.1907	10.044	11.7379	8.22178	14.1037	13.0284	12.2475	15.0651	12.5485	17.5177	11.1034	15.0073	9.55166	19.4622	25.6094	28.4634	73.7824	45.4519	22.2999	10.0012	13.1265	15.0438	11.8875	24.5117	22.602	20.2632	13.8441	25.8843	58.7909	45.7055	35.1412	38.2056	35.1944	78.8967	85.2372	70.5258	65.5756	51.0398	71.3347	12.3648	turquoise
JreChr01G10325	0.350746	0.014841	0.002404	0.90489	0.259902	0.001088	1.46595	1.95294	2.517	1.65574	0.639635	1.23924	2.62345	1.6866	1.64955	4.45611	2.87002	4.14293	4.73166	4.28379	5.13521	5.41556	4.63337	4.12359	0.122664	0.388627	1.97863	1.1782	1.98653	3.82302	4.71689	4.72417	4.91854	3.19528	0.803038	1.17036	1.51669	6.74839	5.34874	5.08635	4.96013	7.8069	7.17818	6.26535	7.16396	4.59986	0.0698117	1.6782	blue
JreChr01G10328	15.1589	12.4196	15.036	8.49815	8.73275	8.28328	6.97055	5.96629	8.04088	3.78398	4.9751	3.99181	3.23256	2.91904	4.41258	7.60102	3.94326	5.75823	8.2211	5.83856	7.2642	9.84026	8.04221	10.2567	14.2048	8.50473	6.99257	4.2503	3.52139	5.76751	7.10796	9.37973	7.85015	4.4155	4.40809	8.22218	12.3645	19.0343	20.0339	17.6981	17.7751	24.6976	26.0958	24.4017	22.0328	21.5473	16.8296	5.61907	turquoise
JreChr01G10329	0.801817	0.346887	0.237614	0	0.236461	0.073929	0.56367	0.814978	0	0.314513	0.07689	0.462236	0.348572	0.040751	0	0.247724	0	0	5.09162	2.90618	8.82669	1.40732	2.88957	1.25709	0.462106	0.103463	0.459549	0.284546	0.129774	0.0825747	5.60816	1.85133	3.02292	0.178218	0.177632	0.193849	1.02016	1.85039	1.10082	1.08955	1.22295	0.440877	0.525789	0.390448	0.85219	1.56865	0.185107	0	blue
JreChr01G10330	0.742142	0.463171	0.763442	0	0.085465	0.276809	0.108535	0.503313	0.061891	0.056098	0.033651	0.37126	0.442816	0.795373	0	0.003036	0.062907	0.050216	5.69611	1.93527	6.89751	0.71345	2.03445	0.476678	0.656252	0.120758	0.22458	0.15367	0.41273	0.0387197	4.84296	1.07486	4.47345	1.17188	0.19128	0	1.10533	1.63342	1.41396	0.982512	1.63827	0.487401	0.526273	0.709722	0.505521	1.45599	0.586027	0.178292	blue
JreChr01G10339	51.3044	30.1109	24.8312	19.8112	23.5226	10.6443	12.5801	8.33771	15.5858	6.18995	5.53326	4.74317	11.0296	9.80068	5.93509	14.8163	12.4747	11.7485	30.8354	16.2638	15.3573	25.1004	30.8242	32.1736	35.4155	17.9927	12.1679	5.4888	8.9218	13.0132	20.8188	29.3661	28.8848	30.3885	10.5709	14.0154	45.1067	30.3231	25.2265	28.3695	27.1511	44.625	39.5077	51.8166	43.6599	34.6718	32.4649	10.7662	brown
JreChr01G10343	7.52557	7.73342	7.807	3.78595	4.77039	5.03776	2.62336	2.18258	2.87578	2.34065	0.817619	2.96439	2.03338	1.27885	2.35725	1.52164	1.43953	2.14533	0.783614	2.21864	0.00598	1.05133	0.013207	1.37276	7.68866	4.53137	2.56057	2.04088	1.88983	1.70217	1.00274	0.812433	0.026422	0.001724	0.729522	4.06267	8.53488	5.8938	6.76095	5.84742	5.47223	8.1894	5.33859	5.16059	7.03411	5.66518	8.2489	1.53285	turquoise
JreChr01G10347	4.2539	1.78517	2.38797	0.100636	0	0.577498	3.3912	1.80664	0.467127	0.120934	0	0.131271	0.342769	1.0967	0.097568	0.396541	0.217957	0.260678	0.033626	0.106928	0.035957	0.045445	0.087762	0	2.80901	0.226045	1.88832	0.0840683	0.512346	0.291725	0.058837	0.0444023	0.472386	0.560496	0.491116	0.073287	1.5251	1.06187	1.25631	1.75762	1.09882	1.46444	1.09938	1.38238	0.875463	0.651454	2.6122	0.331583	turquoise
JreChr01G10371	2.42857	2.41068	2.74656	1.25068	2.36851	2.53973	3.80798	4.31821	3.07113	4.94098	2.62733	6.24236	4.54357	5.16329	5.83984	7.29223	7.45693	8.7647	6.46302	8.08017	7.54399	11.5919	9.4868	12.3927	2.5286	2.05297	3.73244	4.60356	5.18223	7.83796	7.36239	11.1571	7.98789	7.36151	4.39131	4.27529	6.71376	5.28099	7.24153	10.3975	11.2723	3.81483	3.94262	2.85708	2.6088	3.37419	1.66864	3.10245	blue
JreChr01G10375	3.36999	4.57434	3.95577	0.053605	0.053864	1.22084	1.18437	0.031055	0.919445	0.005371	0.052599	0.044981	0.084934	0.071555	1.2076	0.132457	0.054592	1.09169	4.44199	2.0015	5.17594	3.1125	6.11145	12.2997	3.9667	0.44277	0.711622	0.034317	0.454695	0.426247	3.87315	7.17455	3.54452	1.51285	2.03492	2.34789	2.60746	1.15482	1.73115	3.24519	5.68222	3.01603	3.29388	4.17175	4.16211	1.03252	0.145917	0.384936	brown
JreChr01G10377	3.32063	4.28632	5.09539	0.466334	1.12504	0.43326	0.095835	0.098228	0.060391	0	0.049081	0.032309	0	0	0	0	0	0.030172	0	0.071705	0	0	0.031303	0	4.23412	0.674877	0.084818	0.02713	0	0.0100573	0.0239017	0.0104343	0.157102	0.288294	0	0.090141	5.41964	1.7541	0.031798	0.0327813	0	3.50745	0	0.010147	0.0883343	0	2.80352	0.00843133	turquoise
JreChr01G10381	0.615343	0.297571	0.017139	0.037945	0.023645	0.170577	0.821795	0.278408	1.03097	0.756033	1.0152	0.79917	1.93513	1.67075	0.913541	4.9461	2.41908	3.40483	3.35847	3.66343	4.58547	3.63173	4.39042	3.54858	0.310018	0.077389	0.71039	0.8568	1.50647	3.59	3.86912	3.85691	3.40235	1.46533	0.452207	0.719426	5.86449	3.14577	4.31211	9.04483	8.33044	2.60664	3.99292	7.29439	4.6341	4.56968	0.26975	0.84349	blue
JreChr01G10383	0.513211	0.070121	0.559582	9.59877	10.0433	8.19495	15.8132	11.1636	34.2005	12.3788	9.67887	14.0752	15.8347	12.879	16.1699	55.1708	26.3805	65.515	42.7968	22.4954	56.0185	35.1385	44.598	46.8021	0.380971	9.27902	20.3924	12.0443	14.9612	49.0221	40.4369	42.1795	32.643	30.174	5.85785	13.7681	0.180534	0.764083	3.85755	9.65054	13.0586	0.0486063	0.258176	0.27668	0.0374027	0.026436	0.261925	12.1189	blue
JreChr01G10387	7.74224	8.67676	13.3447	0.559652	7.19913	7.04331	4.66153	6.05506	7.035	7.16832	5.43601	4.02879	7.93237	5.97601	6.71088	5.83456	6.81829	6.57411	2.24962	3.03493	0.911455	0.020291	0.036582	0.043336	9.92124	4.93403	5.9172	5.54437	6.87309	6.40899	2.06533	0.033403	2.20318	4.46586	8.07914	1.60926	8.40778	5.33455	5.51466	5.34498	1.9196	4.78651	19.0663	12.6367	33.0558	18.2435	5.47353	3.77694	yellow
JreChr01G10389	5.26608	5.70979	0.63647	0.084542	0.344428	0.195875	0.036068	0.053436	0.03845	0.023607	0.067625	0.052834	0.023414	0.032428	0.027055	0.009555	0.021696	0.01432	0.000585	0.016833	0.009382	0	0	0	3.87078	0.208282	0.0426513	0.048022	0.0276323	0.0151903	0.00893333	0	0.100249	0.158049	0.04156	0.011794	3.26282	1.12563	0.551092	0.554728	0.0509453	0.761275	0.362992	0.42589	0.190111	0.00493133	2.7381	0.034808	turquoise
JreChr01G10392	6.82842	6.22594	4.04895	4.63325	5.45525	3.3103	3.80467	2.58438	3.24824	1.50511	2.11481	1.53016	1.3059	2.52413	2.77415	2.2552	3.67876	3.27363	13.4927	6.56713	14.9915	29.5658	21.9245	18.876	5.7011	4.46627	3.21243	1.71669	2.20139	3.0692	11.6837	23.4554	13.7362	15.4346	5.35077	7.3068	5.1921	5.41719	4.4789	4.92881	12.524	5.91898	4.16799	4.10418	3.64508	2.09789	4.43993	4.12791	blue
JreChr01G10401	24.1716	20.358	19.1724	5.46976	6.72525	5.21977	6.67703	3.77147	5.97969	13.1923	13.2795	18.6882	16.3529	17.0345	16.4654	22.4624	14.4337	29.1428	37.4444	27.3653	41.7752	31.4198	31.5072	32.0807	21.234	5.80492	5.47606	15.0533	16.6176	22.013	35.5283	31.6692	53.679	47.3292	73.6405	8.45661	11.8191	16.9079	8.32164	10.5556	32.3997	1.72606	1.37998	2.26384	1.40948	0.213543	19.919	11.8957	blue
JreChr01G10408	27.8811	3.2802	23.6783	10.4413	0.518834	1.26469	22.9384	1.65603	2.25137	1.74215	0.918192	0.187841	3.7561	1.34498	1.05299	0.863959	12.9635	3.79014	5.13427	0.463311	1.64705	2.99164	1.11031	3.97376	18.2799	4.07496	8.94859	0.949394	2.05136	5.87253	2.41488	2.6919	3.66231	9.17943	1.93295	2.84819	8.75127	7.9222	14.0172	7.86107	9.89909	3.71164	6.01066	4.74082	5.05096	1.85065	21.9413	3.33362	turquoise
JreChr01G10411	9.06605	9.85357	9.71011	4.02993	4.38925	3.96886	2.76817	0.909261	1.81158	0.178185	0.714266	0.294145	0.803536	0.864215	1.10763	1.49752	0.995078	0.930705	0.443584	1.25805	0.928526	2.24128	0.811675	0.021942	9.54324	4.12935	1.82967	0.395532	0.925126	1.1411	0.876722	1.02497	3.441	2.80808	0.004592	3.24603	6.23521	1.91101	1.99325	1.74597	0.578444	2.5126	2.84055	2.81279	2.04167	2.01289	9.16257	1.14609	turquoise
JreChr01G10414	5.17364	3.51088	3.66585	0.462391	1.25835	0.960743	0.958734	1.43863	0.72576	0.286617	0.46765	0.352884	0.744499	0.832914	0.716918	0.98828	1.23313	1.18068	1.05722	0.902997	0.683552	0.768014	0.895058	0.654347	4.11679	0.893827	1.04104	0.36905	0.764777	1.13403	0.881257	0.772473	0.005292	0.679475	0.384837	1.23645	9.89778	11.3123	8.77509	7.72629	5.2354	7.54754	14.5047	11.0555	11.2234	10.402	3.37274	0.970389	turquoise
JreChr01G10423	0	0	0	0.070578	0.044691	0.020924	0.379139	0.402449	1.18897	0.358076	0.512676	0.922966	1.68894	1.45435	0.879567	2.8491	3.55208	3.31225	14.3947	6.23029	13.9201	10.2617	12.2657	4.78482	0	0.0453977	0.656853	0.597906	1.34095	3.23781	11.515	9.10409	13.4294	9.79858	1.6116	0.778882	0.00968933	0.0364457	0.00900333	0.186796	1.07635	0	0	0.0257653	0	0	0	0.703815	blue
JreChr01G10433	3.87453	2.63627	4.35277	4.87675	3.10472	3.23652	2.8292	4.09735	2.9519	1.52086	1.18732	2.41008	0.515741	2.146	1.40099	2.17674	2.63952	1.97425	5.1954	3.44525	5.05523	9.90579	6.64508	12.0313	3.62119	3.73933	3.29282	1.70609	1.35424	2.26351	4.56529	9.52739	3.34578	2.02646	3.27388	1.2223	1.10921	1.70004	1.802	1.93905	4.50483	1.01578	1.90292	1.48621	1.07683	1.10491	2.97016	3.30715	blue
JreChr01G10440	9.51052	25.2704	13.4693	3.38314	3.0888	3.75527	8.28423	4.80048	6.5322	2.05347	1.60472	1.15401	2.04662	1.63111	1.66536	1.64468	1.30296	2.53852	1.39167	0.716118	2.70882	1.89942	1.9296	1.26237	16.0834	3.40907	6.53897	1.60407	1.78103	1.82872	1.60554	1.69713	4.17989	1.9622	2.43788	5.41161	21.2411	19.0231	13.5157	11.8183	4.78285	14.5962	15.567	13.9397	14.1113	11.5488	10.3635	1.1494	turquoise
JreChr01G10451	61.5279	41.0936	42.3776	51.3372	48.5873	51.5149	45.2403	44.4245	26.2615	39.3098	41.6722	43.8516	34.7522	15.6844	35.0872	28.1992	26.7649	31.0117	55.9805	69.4409	72.7081	51.6662	68.294	74.6765	48.333	50.4798	38.6421	41.6112	28.5079	28.6586	66.0431	64.8789	87.1935	80.3848	49.4413	48.7176	24.8049	55.2339	80.7138	87.4423	89.5685	21.1213	38.4436	35.1989	48.7825	45.4377	55.1707	40.1032	blue
JreChr01G10467	7.15734	10.1425	8.14315	8.80936	6.23155	7.15687	7.22856	7.83116	4.64895	5.15867	2.54602	5.47522	4.36031	4.59129	2.89256	8.78202	6.23122	6.91509	12.8356	10.2062	14.8424	12.406	12.529	16.7751	8.481	7.39926	6.56956	4.39331	3.94805	7.30944	12.6281	13.9033	7.25672	8.55298	7.60748	6.82952	15.4341	12.2319	7.95839	19.3651	32.1653	12.2974	10.411	10.6892	12.0614	10.0182	7.68523	7.07295	blue
JreChr01G10472	3.36426	0.851593	0.663901	1.07089	0.375086	1.07374	1.72788	0.38841	0.345476	0.891619	0.985067	0.748192	1.0655	1.24241	0.647453	0.61899	0.288509	0.6596	3.50763	1.19438	2.27713	5.02364	4.01451	7.90895	1.62658	0.839903	0.820587	0.874959	0.985119	0.522366	2.32638	5.64904	2.73772	1.15989	0.879646	0.552026	10.2381	19.2321	19.1681	39.3344	28.0375	26.9085	23.0041	26.238	38.1402	46.5775	2.18252	0.545853	blue
JreChr01G10473	46.0383	37.3219	40.1978	8.28759	9.50296	14.7901	12.6752	9.18567	14.0001	5.75264	5.84771	5.29536	7.48912	10.0838	7.42675	18.1168	10.7097	17.9886	24.2455	23.7362	19.1642	31.804	35.4602	30.0034	41.186	10.8602	11.9537	5.63191	8.33321	15.605	22.382	32.4225	17.3681	25.9197	12.1409	17.2489	37.6307	37.5099	38.0585	43.4574	32.2358	37.6697	29.8234	28.0987	28.2043	25.7191	34.1064	9.83408	brown
JreChr01G10475	2.95494	6.8365	5.16222	0.00026	0.01265	0.020543	0.020531	0.004082	0.000852	0.013795	0.002221	0.015941	0	0.001617	0.000702	0.000267	0.000278	0.001997	0.005674	0.003973	0.001184	0.004137	0.002637	0	4.98455	0.011151	0.00848833	0.0106523	0.000773	0.000847333	0.00361033	0.002258	0.000127	0.007764	0	0.011916	5.46059	0.01236	0.001468	0.00679367	0.002085	0.0163517	0.0185417	0.664548	0.0122797	0.004837	5.47591	0.00457767	turquoise
JreChr01G10485	46.7707	41.5289	51.2436	24.9777	25.1736	33.0496	16.4869	20.2861	16.1734	9.42855	8.76089	9.81981	11.3926	11.03	11.9574	10.4428	10.1702	7.52063	7.68652	8.16128	8.18056	4.36765	6.17743	12.0913	46.5144	27.7336	17.6488	9.33642	11.46	9.37788	8.00945	7.54547	1.28635	8.94956	9.99318	22.0446	19.0968	11.9399	11.7588	13.6321	18.8793	12.9079	8.93335	5.5934	6.27547	5.9997	44.6386	8.50105	turquoise
JreChr01G10488	37.6431	2.85209	1.0399	1.01342	0.064843	0.136162	0.843327	0.583923	0	0	0.162679	0.080317	0.174033	0.114105	0.056207	0.20909	0.066212	0.326263	13.3708	8.82381	11.8054	14.687	16.5242	2.43628	13.845	0.404809	0.47575	0.0809987	0.114782	0.200522	11.3333	11.2158	62.7439	43.2809	14.3227	0.145092	62.0973	199.65	5.97214	2.73405	105.556	11.4086	14.9922	52.2319	33.1476	11.3876	8.73026	0.255687	brown
JreChr01G10491	9.28336	7.00654	8.5144	15.2657	14.2936	12.0312	23.014	23.256	30.4694	7.51247	8.7813	5.64045	9.18001	12.0879	10.1476	12.4516	13.3005	15.6803	18.9157	14.4774	11.1919	23.8732	12.2595	30.3648	8.2681	13.8635	25.5798	7.31141	10.4718	13.8108	14.8616	22.1658	24.1782	30.323	10.5117	12.1885	4.07529	3.48521	5.72137	12.4794	20.3798	4.69453	2.60232	3.87376	2.93658	1.14874	9.44002	22.2647	blue
JreChr01G10492	343.318	328.3	228.991	77.1133	131.903	146.235	144.125	137.947	133.659	59.9272	42.9091	88.5827	84.2822	132.992	126.83	65.2335	95.2377	84.9236	3.0384	56.2103	100.032	141.048	65.727	25.1881	300.203	118.417	138.577	63.8063	114.701	81.7982	53.0937	77.3209	156.055	120.488	80.5058	93.7505	138.67	77.6336	84.0913	107.486	95.9972	182.099	119.229	123.101	42.2247	78.7699	259.165	79.2169	turquoise
JreChr01G10499	52.4347	3.30079	4.20278	10.046	4.02894	1.10817	24.162	57.4378	64.7876	119.932	106.841	111.807	200.813	240.761	213.67	246.983	306.109	243.283	92.0892	168.306	54.8445	17.9959	26.4036	106.307	19.9794	5.06104	48.7958	112.86	218.415	265.458	105.08	50.2356	42.7863	62.3213	110.771	52.9707	60.6573	469.512	140.705	277.002	319.797	0.743408	1.79427	38.8307	61.9878	13.2307	21.2709	128.37	green
JreChr01G10516	42.2987	11.3055	43.1008	65.2939	64.2626	72.2434	40.0133	44.0797	45.8758	26.4696	26.0728	28.9889	35.3317	35.9121	39.4179	31.4753	36.9313	32.157	35.2328	37.0976	39.9855	31.6139	34.6031	4.97605	32.235	67.2666	43.3229	27.1771	36.8872	33.5212	37.4386	23.731	25.7838	34.2071	48.7493	68.6746	21.2556	20.0672	18.1818	24.121	21.6278	16.6455	15.5874	13.3091	12.3499	11.7955	44.5173	30.9253	yellow
JreChr01G10524	11.7346	9.29414	9.1194	0.691305	1.0056	1.6046	0.949547	0.122858	0.558304	1.75717	0.152728	0.888246	0.407657	0.246183	1.09303	3.33203	0.364895	2.89511	0.428406	0.779489	1.43946	1.54535	2.26754	2.09516	10.0494	1.1005	0.54357	0.932713	0.582289	2.19735	0.882453	1.96935	4.96715	1.43521	0.232066	0.66898	24.19	6.97557	10.0185	12.0858	16.7298	28.2952	33.6861	32.5628	34.1549	20.2527	11.9023	0.392762	turquoise
JreChr01G10529	380.859	400.62	171.014	207.03	285.864	290.852	86.534	71.5265	82.3492	76.3436	41.9618	58.3185	36.9109	41.0919	35.3804	95.6536	58.4469	91.9948	40.9554	32.358	47.7951	44.2399	51.8876	62.3962	317.498	261.248	80.1366	58.8746	37.7944	82.0318	40.3695	52.8413	121.886	97.7285	27.0696	98.3013	185.97	17.8038	13.0901	27.4703	21.9139	393.847	110.061	63.3636	24.1235	10.9566	415.532	88.4374	turquoise
JreChr01G10545	417.417	346.198	477.787	976.233	807.772	811.413	393.526	440.213	513.037	519.391	516.328	539.801	581.227	589.423	592.558	614.419	400.229	505.607	540.813	695.442	670.776	324.428	468.929	444.926	413.801	865.139	448.925	525.173	587.736	506.752	635.677	412.761	444.721	721.648	689.1	907.815	3.66021	65.4919	120.213	173.891	280.097	0.315881	1.51903	3.44884	12.3664	5.79748	418.693	369.51	yellow
JreChr01G10549	4.2667	4.19897	4.03234	0.000899	0.003017	0.527498	0.001359	0.001454	0.002089	0.008536	0.003175	0.015675	0.001859	0.000228	0.006038	0.015005	0.027606	0.010203	0.052311	0.014133	0.061597	0.082905	0.01752	0.059808	4.16601	0.177138	0.001634	0.00912867	0.00270833	0.0176047	0.0426803	0.053411	0.000316	0.024114	0.004696	0.001132	2.36288	0.00350533	0.00241533	0.00298933	0.002376	0.977357	0.385082	0.00224367	0.0920743	0.00129067	5.2583	0.00860167	turquoise
JreChr01G10551	23.9405	16.32	18.1291	8.75789	10.2481	10.2313	8.37155	8.48188	8.01493	4.26439	3.74721	3.85732	4.80744	5.28884	5.39446	7.08953	4.74221	5.86258	9.23531	7.5194	10.0654	8.33338	8.19317	13.6373	19.4632	9.74576	8.28945	3.95631	5.16358	5.89811	8.94002	10.0546	5.50198	6.1486	4.25594	5.21991	12.7151	15.253	20.1721	18.6844	15.9873	20.993	20.0007	20.0632	22.1818	25.3738	21.1416	6.25044	turquoise
JreChr01G10553	330.339	344.267	406.702	440.666	430.6	723.643	440.818	479.908	357.172	332.444	258.116	296.359	124.766	103.323	158.306	1371.98	649.079	1297.55	590.792	483.91	591.701	514.576	473.54	847.231	360.436	531.636	425.966	295.64	128.798	1106.2	555.467	611.782	236.817	309.693	447.846	273.313	139.467	93.8205	58.213	221.412	188.082	265.309	154.53	529.605	540.409	412.59	565.863	321.652	blue
JreChr01G10560	3.0397	2.13179	2.24744	0.001185	0.011094	0.013232	0.00228	0.003637	0.008171	0.006987	0.000808	0.021287	0.003863	0.016927	0	0.000154	0	0	0.010376	0	0	0	0	0	2.47297	0.00850367	0.004696	0.009694	0.00693	5.13333e-05	0.00345867	0	0.001155	0	0.005233	0.007556	4.63341	2.88818	1.27449	1.6703	0.990398	4.60068	4.61407	6.37037	4.40378	3.89795	2.05437	0.000536	turquoise
JreChr01G10566	38.9086	32.3716	46.8525	74.4265	74.1487	63.7025	54.3374	53.1069	39.3065	31.5613	32.3456	35.8613	33.1994	29.1138	17.8628	43.9935	34.7793	43.2988	67.3251	54.2881	31.6555	25.2806	49.5679	14.5591	39.3775	70.7592	48.9169	33.2561	26.7253	40.6905	51.0896	29.8025	33.935	65.2576	42.3641	72.4049	12.9352	20.6773	10.2548	26.0924	36.5652	11.46	22.308	20.9794	18.677	9.66085	39.5543	33.7419	yellow
JreChr01G10570	31.3937	23.7537	18.7315	4.77365	5.18735	7.44017	4.53443	3.63299	5.62281	3.64345	4.67949	4.81885	4.03082	5.10929	5.60015	6.67896	4.90136	8.59528	9.96742	8.09882	8.10426	14.7882	9.6761	9.41145	24.6263	5.80039	4.59674	4.3806	4.91342	6.7252	8.7235	11.2919	8.45363	4.18144	6.62321	4.89677	18.3866	10.2883	11.9691	8.8045	9.10049	19.1632	14.9745	16.8277	13.0793	9.81181	20.4334	4.5175	turquoise
JreChr01G10576	10.7991	11.8888	10.8468	10.7749	9.30711	8.95936	7.30374	8.3911	8.11394	9.96944	8.50478	9.07171	7.73474	7.26199	9.74173	31.2118	20.2963	25.8683	25.2933	23.6766	37.5081	23.3645	24.3678	31.6094	11.1782	9.68045	7.93626	9.18197	8.24615	25.7921	28.826	26.4472	22.4967	14.3805	1.80144	13.9327	6.35523	4.46135	2.56023	7.20231	3.41431	1.41307	0.262619	0.68048	0.505057	0.203743	10.7897	6.80294	blue
JreChr01G10577	17.1125	14.0181	15.1988	194.118	520.439	153.459	323.909	370.767	402.674	1046.02	875.884	1413.6	829.49	1044.53	831.219	795.682	1572.51	974.958	3599.21	1995.76	3873.16	3274.24	14.7218	1451.62	15.4431	289.339	365.783	1111.84	901.747	1114.38	3156.04	1580.19	4713.02	2591.82	927.018	1348.02	0.024279	7.1746	96.8304	197.408	1913.15	11.1076	21.4983	5.78382	5.28735	5.24906	27.5397	848.328	blue
JreChr01G10579	25.8145	27.0369	1.38305	446.122	425.607	369.957	153.577	190.516	156.046	382.015	263.006	361.105	457.556	450.848	237.237	524.345	424.642	536.819	560.34	611.341	507.298	701.199	640.478	184.604	18.0782	413.895	166.713	335.375	381.88	495.269	559.66	508.76	475.143	44.3351	209.107	278.7	0.271074	20.7811	22.9123	104.54	236.317	0.0828923	0.642179	0.26236	0.788679	0.739176	44.8156	257.886	green
JreChr01G10589	3.42076	3.01239	3.13702	2.33013	2.46522	2.52767	2.0361	1.40403	2.17744	2.73764	1.82469	2.54973	3.77286	3.45721	2.55102	7.76286	4.15681	7.78232	7.87033	4.63967	5.09175	10.2847	7.2886	14.4063	3.19006	2.44101	1.87252	2.37069	3.26036	6.56733	5.86725	10.6599	5.91611	2.37521	2.6014	2.43302	3.31205	10.2872	9.49711	9.85751	6.48823	2.41049	4.97944	5.92226	6.39428	6.0814	3.43834	2.0879	blue
JreChr01G10590	62.7535	60.1026	67.7046	143.93	151.147	110.865	116.318	115.101	67.3355	389.712	207.192	218.737	213.545	245.799	197.271	471.425	428.338	387.344	1031.05	707.96	1111.73	1746.84	1396.38	446.476	63.5202	135.314	99.5848	271.88	218.872	429.036	950.247	1196.57	859.909	1019.48	443.785	171.868	96.7391	343.761	474.452	413.726	445.827	189.907	460.95	458.043	746.782	640.005	66.8695	374.837	blue
JreChr01G10593	0.706546	0.645314	1.50114	2.39644	2.75819	1.47215	0.487024	1.10308	2.41832	0.095955	0.451823	0.231474	1.27809	0.70663	0.002406	5.91553	2.21565	7.76903	1.21906	0.265178	0.879875	0.876066	0.252084	1.12184	0.950999	2.20893	1.33614	0.259751	0.662375	5.30007	0.788038	0.749997	0.003174	0.755551	1.07224	2.55962	0.004997	0.027499	1.17766	1.91281	1.7846	0.226905	0.584275	0.546534	0.230415	0.0418847	0.535113	1.23543	green
JreChr01G10597	14.3297	23.1233	21.8166	17.5004	26.0141	22.6271	16.2021	15.8021	7.71871	5.18909	8.15225	7.57215	3.23415	3.34195	4.21934	1.41305	1.47171	2.18156	1.55202	1.96504	3.31716	0.008596	0.568273	0.008075	19.7565	22.0472	13.241	6.97116	3.59848	1.68877	2.27808	0.194981	4.88211	7.31733	8.40548	24.6152	21.0192	25.6388	20.232	37.1153	85.2775	179.696	27.3793	57.2238	81.0958	85.3567	14.9778	3.42892	yellow
JreChr01G10613	20.5332	23.0375	22.2726	5.8172	7.75274	10.7025	3.64589	5.13163	2.8838	2.46023	2.30902	2.41393	2.27089	2.31117	2.96029	3.36242	4.24728	2.21188	3.12238	4.40327	3.45456	4.78466	1.16175	3.49792	21.9478	8.0908	3.8871	2.39439	2.51411	3.27386	3.66007	3.14811	1.33707	1.61339	2.45616	5.8888	12.3861	9.82786	6.29093	6.56325	2.63146	10.3051	9.10868	7.56747	7.56439	4.29122	16.4436	2.75865	turquoise
JreChr01G10614	7.15949	6.49468	5.61663	0.094583	0.742564	1.68859	0.000766	0.203544	0	0.000141	0	0.008499	0.001458	0.006758	0	0	0.00865	0.001653	0	0.007465	0	0	0	0	6.4236	0.841912	0.0681033	0.00288	0.00273867	0.00343433	0.00248833	0	0.002144	0.001404	0	0.137561	4.05576	0.894823	0.001503	0.19478	0.00356633	0.903148	1.2186	1.42388	2.95484	1.5105	5.9167	0.00183167	turquoise
JreChr01G10619	33.2607	33.1329	27.6193	15.7747	17.8791	26.2149	11.4407	10.8511	11.2627	12.0818	8.95367	9.16128	9.82607	11.2866	15.7162	15.6237	14.1873	17.4806	11.5109	9.28026	7.2892	6.84843	5.76622	12.8376	31.3376	19.9562	11.1848	10.0656	12.2763	15.7639	9.36012	8.48409	0.446007	1.04414	13.692	9.995	21.3676	13.9316	4.16806	3.9335	2.7014	43.3083	35.0275	46.7093	19.9465	17.0006	41.1754	11.0066	turquoise
JreChr01G10629	2.03219	2.49861	2.67479	2.05404	3.24388	2.08929	2.27604	2.41334	1.08039	0.275547	1.67132	3.58451	5.95913	4.33142	4.81351	6.24543	8.49051	7.71393	38.5477	21.2054	49.6778	46.1395	43.7233	64.0566	2.40186	2.4624	1.92325	1.84379	5.03469	7.48329	36.4769	51.3065	28.8116	17.8096	9.49354	4.78487	4.2371	12.2017	18.9826	25.8995	30.261	3.10199	3.81208	3.31916	4.33968	7.51106	2.03105	5.78138	blue
JreChr01G10637	0	0	0	0	0.043874	0	0	0.049322	0.079987	0.150265	0.454042	0.721627	0.682506	1.4686	0.623817	18.5067	10.5741	13.0238	32.0272	19.1631	56.8923	45.6874	53.7162	34.5427	0	0.0146247	0.043103	0.441978	0.924974	14.0349	36.0275	44.6488	7.17148	1.09636	0	0.258279	0.019901	0.149383	0.45293	10.9998	13.3102	0.020367	0.311639	0.0570537	0.0321547	0.20392	0.107744	0.226668	blue
JreChr01G10650	12.559	7.80058	8.09144	23.3186	22.2557	29.0136	31.1551	36.0431	24.8784	42.7536	44.8618	53.6121	68.7432	62.3403	64.4017	87.5112	97.0885	93.3187	132.584	123.829	136.501	122.223	116.813	143.733	9.48367	24.8626	30.6922	47.0758	65.1617	92.6395	130.972	127.589	47.9804	65.4722	78.0094	64.5629	6.02907	28.9034	39.8	63.4106	148.386	8.33617	9.9978	14.0348	16.1449	17.2988	10.5679	84.368	blue
JreChr01G10661	0.400793	0.236673	0.541859	1.61077	4.06628	8.65393	11.1901	19.4892	15.7512	25.3477	11.9859	14.7921	1.84968	2.44936	1.89347	52.0766	16.8396	49.3542	1.24596	3.1385	0.778996	3.89634	11.8968	18.3708	0.393108	4.777	15.4768	17.3752	2.06417	39.4235	1.72115	11.388	18.4744	28.8743	31.3273	10.1727	5.72875	37.3333	21.8116	27.2173	11.5341	36.0024	23.7037	64.8018	65.2121	32.7388	2.67945	20.6455	green
JreChr01G10662	97.8895	99.287	95.2253	48.1744	47.9086	60.1886	53.203	51.3698	44.1624	20.5888	17.5744	17.0737	21.7162	19.6389	19.0683	44.4355	33.5182	58.851	22.3497	22.4901	17.2638	9.66961	11.4128	18.3035	97.4673	52.0905	49.5784	18.4123	20.1411	45.6015	20.7012	13.1287	14.8572	22.7271	24.2175	33.9344	57.3825	42.6772	10.6367	29.899	12.7107	109.717	73.9752	87.4727	67.3614	77.8329	108.443	35.7138	turquoise
JreChr01G10668	5.47268	5.03385	4.50569	1.22154	1.21343	1.33157	0.001573	0.005624	0.56481	0.615494	0.00021	0.484008	0.299194	0.584083	0.000171	2.37435	1.3212	2.38723	2.8018	1.79551	1.85017	5.23343	4.66695	4.58939	5.00407	1.25551	0.190669	0.366571	0.294483	2.0276	2.14916	4.82992	2.68128	0.007366	1.3863	1.54095	7.14811	1.89377	1.52277	1.88979	2.74619	3.64419	4.6021	5.03304	4.42717	3.00841	4.53456	0.240453	brown
JreChr01G10676	2.43361	0.948086	1.77255	7.48077	6.51925	9.55476	11.0712	8.67997	11.7446	5.99247	3.4955	4.67105	5.51512	3.98396	5.34493	8.99593	8.10453	5.92941	1.23622	4.29791	0.986442	0.199757	0.775658	2.76592	1.71808	7.85159	10.4986	4.71967	4.948	7.67662	2.17352	1.24711	1.94626	8.2576	5.17502	6.42754	11.2437	8.75196	1.77657	2.18432	0.133141	2.11351	1.53044	4.0201	2.39892	0.339658	3.43001	5.03222	red
JreChr01G10678	1.14577	0.793865	0.916578	5.20465	3.44572	4.76528	7.83182	6.55401	7.76895	5.19369	4.3484	4.33361	6.3583	5.59605	5.62982	11.9594	4.16257	6.209	3.69061	5.80457	6.53735	6.56434	5.21166	8.97715	0.952072	4.47188	7.38493	4.62523	5.86139	7.44367	5.34418	6.91771	1.02489	4.52879	7.63814	3.9567	5.66854	12.5308	16.1508	41.2261	23.6978	2.81665	6.10268	7.03038	9.16119	20.2231	1.76514	4.64764	green
JreChr01G10690	5.3417	3.94564	17.7015	10.3695	14.132	19.9002	6.8077	12.353	13.4365	10.3617	7.4053	6.17335	6.25353	6.43184	6.61266	3.07303	9.73063	2.77373	9.62561	7.72739	5.56552	8.00704	10.1272	3.60005	8.99626	14.8005	10.8657	7.98011	6.43268	5.19246	7.63951	7.24477	6.91904	8.28922	4.99381	12.9016	3.81058	11.9671	15.344	7.75098	12.5668	4.8246	4.83025	5.66134	3.98801	3.90021	12.6721	6.82438	yellow
JreChr01G10694	4.41624	3.73033	3.07725	0.115429	1.68555	0.621652	0	0.055158	0.051767	0	0	0	0	0	0	0.111138	0	0	0	0	0	0	0	0	3.74127	0.807545	0.0356417	0	0	0.037046	0	0	0	0.746711	0	0.297763	20.146	6.20107	1.72273	0.746303	0.077796	1.06102	0.144752	0.330966	1.18374	0	2.03276	0	turquoise
JreChr01G10701	32.8638	35.767	35.8958	14.2667	14.7397	17.8956	14.2049	11.3803	15.1355	7.95266	11.362	6.75254	10.5988	8.30379	9.98807	14.3781	9.50547	12.1072	15.6553	16.9579	15.3911	15.2015	11.0405	10.7961	34.8422	15.634	13.5736	8.68908	9.63021	11.9969	16.0014	12.346	8.71695	16.0364	7.97783	15.1499	26.4838	61.9814	73.8496	61.7421	19.7494	22.9033	23.5323	22.2195	30.8531	46.251	21.5531	9.65531	turquoise
JreChr01G10702	9.39177	10.2547	9.96093	4.06958	3.29729	3.97626	2.30254	4.05335	1.26187	2.26309	2.27481	2.18631	2.63865	2.29589	2.22448	5.17728	2.71442	5.28483	4.27923	4.5278	3.6499	3.46415	3.47945	3.04201	9.86915	3.78104	2.53926	2.2414	2.38634	4.39218	4.15231	3.32854	0.536663	0.951978	0.505798	5.17946	9.62622	6.7831	6.47585	5.03422	4.13248	5.04859	6.38789	4.96691	7.24189	6.01457	7.44682	1.22697	turquoise
JreChr01G10710	372.09	353.438	324.715	83.0449	88.1842	94.8645	99.8514	80.6012	64.5837	43.3557	48.7926	45.563	48.5742	58.9056	55.2732	60.1883	56.1743	66.5439	90.9908	59.4802	90.0878	128.094	140.098	144.287	350.081	88.6979	81.6787	45.9037	54.251	60.9688	80.1863	137.493	94.5879	83.7583	59.9692	69.9139	211.657	170.651	110.573	108.927	155.413	143.938	107.257	120.41	97.218	95.5995	341.609	60.5698	turquoise
JreChr01G10716	1.29567	0.860816	0.509036	0.459716	0.613436	0.535685	1.40665	0.723383	0.567045	1.25186	1.72515	1.59654	1.20528	1.04033	0.85384	5.1285	2.79998	8.6809	14.816	6.38061	21.9971	25.2181	24.7435	22.0386	0.888506	0.536279	0.899026	1.52452	1.03315	5.53646	14.3979	24.0001	5.79239	3.93349	8.78506	0.967383	1.3523	4.36305	4.33422	3.91956	16.873	1.15845	7.24232	7.28925	11.0337	14.7469	0.832501	0.903572	blue
JreChr01G10745	5.30204	4.71321	3.71758	0.021527	0.06327	0.20507	0.053866	0	0.016839	0	0	0	0.011551	0	0.012522	0	0	0	0	0	0	0	0	0	4.57761	0.0966223	0.0235683	0	0.00802433	0	0	0	0	0	0	0	2.35719	1.42711	0.872492	0.428161	0.226641	0.602657	0.066391	0.0193423	0.0972617	0.00148333	2.72413	0.001024	turquoise
JreChr01G10749	102.843	75.8457	76.9682	65.3165	43.2204	77.1611	63.0063	61.5755	85.893	20.4981	25.9141	24.5838	27.5368	23.9868	24.7228	37.8351	31.898	39.2921	36.3075	29.0751	34.1358	35.9789	39.8663	33.7481	85.2189	61.8993	70.1583	23.6654	25.4155	36.3417	33.1728	36.5311	30.2989	32.332	39.2628	54.7666	64.4732	50.8618	45.2099	44.8926	40.7096	82.7408	76.4446	87.386	66.6692	63.6776	94.0282	27.1628	turquoise
JreChr01G10752	10.9826	8.87526	6.74662	2.53769	5.30959	3.63509	3.69825	2.60778	3.86474	1.82394	2.58645	2.40391	3.74689	2.24096	2.15998	4.40615	2.44808	4.55122	3.42715	5.08487	2.8865	3.4998	5.2089	0.745232	8.86815	3.82746	3.39026	2.27144	2.71594	3.80182	3.79951	3.15131	3.92438	6.26357	3.54343	3.39449	9.50763	6.51375	4.86457	7.31388	5.97902	10.4866	8.22257	8.10401	9.50676	8.04066	8.35568	2.01178	turquoise
JreChr01G10753	10.7559	14.3734	12.1078	11.686	9.30816	12.7189	7.20984	8.2615	5.83463	4.94897	3.71512	5.78261	7.13293	6.07073	6.5227	7.67696	5.59407	6.89598	4.89559	5.46962	5.35369	4.40724	4.00229	4.10561	12.4124	11.2377	7.10199	4.81557	6.57546	6.72234	5.23963	4.17171	5.04634	6.97101	5.65604	12.0281	14.1147	4.60911	4.50008	3.48579	2.45761	14.5687	12.3947	9.23506	6.20647	3.51719	12.0708	5.09505	turquoise
JreChr01G10778	20.2072	14.5453	13.2038	3.23494	6.48215	5.85625	3.03965	2.71692	3.05738	3.33957	3.44231	4.57123	3.78192	5.65646	2.73301	7.5053	6.19742	7.9093	9.97644	6.46707	8.22706	12.4591	9.84358	13.4078	15.9854	5.19111	2.93798	3.78437	4.05713	7.20401	8.22353	11.9035	4.95695	5.5161	6.53784	7.90337	8.48496	5.59752	5.6493	5.1118	7.60329	4.77624	4.9838	5.30362	3.8301	3.332	17.194	3.20978	brown
JreChr01G10789	1.81569	3.27152	2.8159	9.40772	7.87069	8.02813	11.0194	13.6933	14.8136	14.6926	11.9781	14.0566	18.3618	18.4101	16.1017	21.4436	18.3042	22.1599	15.7405	12.4517	18.9454	12.9855	13.5092	20.4618	2.63437	8.43551	13.1754	13.5757	17.6246	20.6359	15.7125	15.6522	7.16958	11.1921	17.0053	12.7909	1.47554	3.94193	7.35267	10.467	11.5594	3.73697	2.31603	2.28266	1.59934	1.14194	2.46617	16.7908	green
JreChr01G10796	0.101662	0.48886	104.7	0.377259	35.5971	0.718466	2.61068	77.7529	0.750439	2.60775	3.24217	3.45804	83.1015	1.32164	1.68899	141.629	2.83841	2.42737	3.05412	0.679944	1.45729	2.17019	77.3403	4.26077	35.0968	12.231	27.038	3.10265	28.704	48.965	1.73045	27.9237	147.134	0.10219	2.90405	62.7002	1.14061	32.3405	2.44681	48.4199	49.4601	59.3349	33.5787	128.414	282.035	86.4635	1.20899	2.79315
JreChr01G10798	13.9547	11.3217	12.722	3.92597	5.04763	6.6324	2.43335	1.0807	1.47902	2.36312	0.509332	1.24602	0.488177	0.571124	0.508071	1.19834	0.637916	0.987356	6.88969	2.13394	7.94231	5.76412	4.02443	5.14959	12.6661	5.202	1.66436	1.37282	0.522457	0.941204	5.65531	4.97938	40.2721	34.2303	3.67671	1.43848	19.1935	3.17173	1.23349	3.84421	8.05748	282.881	284.521	95.6447	47.4268	89.4338	11.5702	0.621421	turquoise
JreChr01G10799	8.65501	11.1227	7.26642	3.31047	4.82158	4.10312	4.43578	4.37487	3.40777	3.25637	1.81864	1.795	2.25914	3.55701	1.54008	3.37092	3.02086	3.48054	3.67094	4.51567	4.10338	8.91417	6.4884	9.08526	9.01473	4.07839	4.07281	2.29	2.45207	3.29078	4.09667	8.16261	6.11524	6.81325	4.00658	3.77406	9.76674	11.0762	9.54571	7.94368	6.98859	23.0999	23.3573	18.2068	13.8987	13.3032	8.9388	3.5752	brown
JreChr01G10803	235.874	220.474	245.024	117.283	109.891	164.431	123.156	95.8658	123.944	63.9981	56.8723	59.1301	78.144	79.9497	70.9595	91.4853	87.0831	56.4894	50.377	61.6003	45.7284	32.2299	34.5306	70.7449	233.791	130.535	114.322	60.0002	76.3511	78.3526	52.5686	45.8351	42.0855	56.3323	97.9078	94.9557	159.193	86.7449	73.7017	84.9329	69.9628	149.501	146.73	200.547	308.166	308.859	259.235	47.2658	turquoise
JreChr01G10805	38.1995	29.5013	28.1073	14.2439	9.42241	22.6527	12.2463	11.0494	12.5768	8.21674	7.93584	7.98788	14.5167	19.9198	9.50608	56.813	36.5766	50.113	63.8683	30.6999	52.462	33.4963	41.4669	54.9087	31.936	15.4397	11.9575	8.04682	14.6475	47.8342	49.0101	43.2906	29.2482	16.5103	11.8128	10.9853	181.045	107.079	124.65	111.411	96.8391	178.29	277.253	244.561	351.373	293.748	36.8327	5.89657	blue
JreChr01G10810	1.09747	0.962559	0.661916	1.25466	1.52388	1.37464	1.17815	1.76641	1.18748	1.82	1.07822	2.17143	2.11299	1.8405	1.89345	4.06876	2.53045	5.15629	7.34405	6.26056	5.8497	8.94292	8.45681	10.5209	0.907314	1.38439	1.37735	1.68988	1.94898	3.9185	6.48477	9.30687	5.61925	3.65347	1.64003	3.04095	2.21485	5.47619	7.00745	6.08184	8.94964	2.1929	4.45482	4.55149	4.96074	3.34864	1.04454	1.18798	blue
JreChr01G10814	20.7769	13.457	10.6195	37.1357	71.5796	23.0541	9.35861	8.87027	51.3458	16.0987	45.878	40.482	5.89845	53.8629	11.8033	3.85723	102.277	56.8992	179.581	194.874	403.267	245.199	221.471	12.9072	14.9511	43.9231	23.1915	34.1529	23.8549	54.3446	259.241	159.859	157.575	72.1722	14.9156	106.029	138.719	129.438	35.1762	39.3735	49.8628	149.057	129.199	55.639	38.15	26.4708	9.15476	66.3121	blue
JreChr01G10815	0.047488	0	0	1.31127	0.642373	0.089262	0.328315	0.337744	0.046044	0.42717	0.261991	1.58901	0.227036	0.041867	0.196066	4.81925	0.45592	0.458645	1.51014	2.48186	0.491248	1.79326	1.87113	6.0559	0.0158293	0.680968	0.237368	0.75939	0.15499	1.91127	1.49442	3.2401	2.18406	2.54201	0.10887	1.41505	8.77795	3.48011	6.7324	5.62777	0.944058	5.56214	4.44219	6.84401	1.39587	3.33181	0.628506	0.216353	blue
JreChr01G10817	0.084453	0.095364	0	1.5213	0.494363	0.058806	0.286362	0.422134	0.503643	1.573	1.06499	2.63815	0.927376	0.188703	0.32858	12.7446	2.7198	5.86523	1.51045	2.55792	4.68066	3.18242	2.60731	8.81046	0.059939	0.691488	0.404046	1.75871	0.481553	7.10989	2.91634	4.86673	2.1219	1.8673	0.404848	1.57237	13.8513	14.7754	26.6541	12.7803	6.29305	4.19666	5.66637	6.46021	2.31559	3.29469	1.61778	0.499851	blue
JreChr01G10819	0.94297	0.899389	1.23233	9.07384	3.93423	8.60105	13.0004	6.65255	7.89068	16.1035	14.6599	24.8374	0.329077	4.87157	31.6515	202.307	53.6205	128.748	28.0334	4.98565	11.3955	65.3083	1.79997	0.539427	1.0249	7.20304	9.18122	18.5336	12.284	128.225	14.8048	22.5492	48.7299	16.2949	19.8872	0.270856	47.1492	63.7966	132.652	254.988	961.713	58.8949	523.953	436.518	437.112	636.313	12.2201	27.1408	green
JreChr01G10822	7.39961	4.41924	7.04858	6.25504	16.6685	13.531	17.3978	18.9053	11.0082	13.7012	12.8821	14.1158	17.1576	15.2457	18.7821	57.2964	25.9475	45.5026	36.6348	28.334	35.8187	36.7662	37.0035	31.17	6.28914	12.1515	15.7704	13.5664	17.0618	42.9155	33.5958	34.9799	19.9697	24.4425	12.4509	15.1066	14.9273	13.8728	14.9613	22.6256	17.1447	27.2327	28.891	39.5339	31.4204	33.7832	7.20678	18.25	green
JreChr01G10825	23.9447	0.025834	0.209276	0.67322	1.09943	0.450507	49.4199	52.542	0.324236	0.486513	0.333935	0.006332	0.048308	0.185736	0.39407	38.7921	1.42585	32.4776	0.074782	0.288492	0.110647	23.3877	0.996905	0.00627	8.05995	0.741052	34.0954	0.275593	0.209371	24.2319	0.157974	8.13029	0.1104	3.45554	45.0405	81.0911	0.754992	0.897391	0.199918	3.7752	0.179769	0.636034	0.108692	0.241122	0.140513	0.102018	14.2171	0.200886
JreChr01G10875	0.025423	0.011818	0	0.008225	0	0.005973	0.04868	0	0.023991	0.086786	0.095394	0.026309	0.29562	0.095793	0.013631	0.65944	1.18229	0.905202	1.74694	1.51217	2.10489	3.67723	2.38822	4.39592	0.0124137	0.00473267	0.0242237	0.0694963	0.135015	0.915643	1.788	3.48712	0.770592	0.637928	0.043714	0.055487	0.118111	0.885498	2.88353	3.697	6.6368	0.00725367	0.00823267	0.0486173	0.0241387	0.008698	0.00198067	0.0870163	blue
JreChr01G10877	0.088339	0.043685	0.029063	1.0612	1.67355	1.05233	1.39711	1.08173	0.837242	6.37867	4.34063	6.43544	5.9053	5.26973	5.7124	2.42585	9.12822	6.2314	9.66239	15.8484	3.29064	4.8789	4.70587	3.51957	0.0536957	1.26236	1.10536	5.71825	5.62915	5.92849	9.60047	4.36811	4.91392	4.69275	2.06277	5.6762	0.005818	0.551736	0.840023	1.18018	7.01662	0	0	0	0	0	0.0136507	6.31725	green
JreChr01G10900	0.01658	0	0	0.01192	0.004358	0	0.182597	0.013022	0.024287	0.082587	0.034907	0.022468	0.296311	0.069602	0.034888	0.880081	0.683414	1.12507	2.33092	2.83193	3.21443	4.05432	1.94834	3.82337	0.00552667	0.005426	0.073302	0.046654	0.1336	0.896189	2.79243	3.27534	1.44052	0.67296	0.145708	0.125178	0.033243	0.546897	1.76978	1.97516	2.356	0	0.004189	0.00789967	0.00901033	0.00420167	0.009637	0.166509	blue
JreChr01G10902	0.050479	0.043685	0	0.84937	1.37924	0.778659	1.13624	0.885205	0.823055	5.82471	2.89832	2.45305	4.30681	4.11629	4.11379	5.54894	5.60279	4.15567	8.2549	13.4394	12.0128	3.17904	2.93935	2.58478	0.031388	1.00242	0.948167	3.72536	4.17897	5.10247	11.2357	2.90106	2.89698	2.85224	1.53107	1.31787	0.00436367	0.366592	0.498569	0.898429	1.54583	0	0	0	0	0	0.012171	3.78811	green
JreChr01G10912	0	0.023794	0	1.16345	0.664913	0.371269	5.40059	3.74348	2.52439	13.6419	3.67975	10.7846	4.08303	2.48986	23.2207	2.30814	16.4961	42.0424	1.85546	3.10666	35.9741	2.73897	2.09331	9.28003	0.00793133	0.733209	3.88948	9.36875	9.9312	20.2822	13.6454	4.7041	0.923698	3.81041	4.76249	3.72169	0	1.56014	5.89096	4.47004	2.53395	0	0	0.00938067	0.06925	0.0202337	0.031989	6.94119	green
JreChr01G10923	5.2565	4.08111	5.41666	0.329996	0.491548	1.25788	1.06725	1.45524	0.008051	0.002273	0.31	0.006732	0.006945	0.000636	0.000761	0.902286	0.02084	0.017594	0.002549	0.032615	0.001349	0.028138	0.83959	1.40238	4.91809	0.693141	0.843512	0.106335	0.00278067	0.313573	0.012171	0.756703	0.02721	0.03815	0.22186	0.002585	2.51585	1.08605	0.010605	0.92654	0.00690733	0.209355	0.378995	0.214356	0.125503	0.00386833	4.99862	0.0420413	turquoise
JreChr01G10930	52.0325	22.543	23.9031	0.000541	0.115508	0.137814	0.563452	0.000969	0.001353	56.0035	27.4698	40.2666	14.3478	20.9215	35.757	4.41697	2.45757	8.5212	4.29938	8.78496	4.3712	6.43937	7.24586	10.4951	32.8262	0.084621	0.188591	41.2467	23.6754	5.13191	5.81851	8.06011	2.27322	4.40337	144.122	1.78104	4.98812	16.7689	37.0209	9.55964	18.9	2.2558	1.17723	0.142108	0.594141	5.88256	48.7887	13.2655
JreChr01G10940	50.3669	17.7118	10.954	59.6252	39.2825	32.4803	18.2212	35.315	42.3635	93.8121	32.7919	61.4483	90.9182	148.341	24.004	80.205	158.651	64.8151	231.236	222.83	263.98	314.752	406.722	148.429	26.3442	43.796	31.9666	62.6841	87.7544	101.224	239.349	289.968	2228.26	639.099	208.827	95.8476	0.401888	27.2121	17.936	76.9981	170.029	0	0.629312	5.81427	1.22278	1.15139	38.3479	128.727	blue
JreChr01G10947	35.6589	31.833	24.8617	10.4788	13.4095	9.28637	10.2538	7.69982	5.75671	6.51863	8.8488	8.9104	8.28785	9.27994	8.47834	10.8809	10.4475	10.0129	19.6622	18.3943	12.0617	22.745	21.2079	15.7919	30.7845	11.0582	7.90345	8.09261	8.68204	10.4471	16.706	19.9149	25.2534	36.1236	12.9262	15.4092	30.8023	35.3432	27.8854	25.1035	15.4922	17.8321	11.8935	17.3319	12.1573	12.5741	28.5987	7.49422	turquoise
JreChr01G11009	8.67849	37.2383	37.7611	4.31165	9.68501	7.77387	3.52521	2.0574	3.91547	6.91111	6.41769	6.20502	4.45591	4.48213	4.05467	4.06763	3.74198	4.15802	6.23817	7.94575	8.05681	7.31658	9.33621	10.6807	27.8926	7.25684	3.16602	6.51127	4.33091	3.98921	7.41358	9.11115	16.8032	8.1851	2.7907	4.28658	11.6393	5.56311	4.16507	3.20502	2.05045	3.10448	2.08278	2.94923	2.38652	1.91711	21.634	3.66371	turquoise
JreChr01G11016	2.30026	1.174	0.278294	22.5027	19.5025	18.2487	5.11937	9.76611	11.3693	1.19827	3.2933	0.107717	4.78126	4.1791	3.78194	3.61692	4.01105	3.65868	0.123622	0.467951	0.019318	0	0	0	1.25085	20.0846	8.75159	1.5331	4.24743	3.76222	0.20363	0	2.0653	1.57674	0.982919	5.35288	4.15001	3.58904	1.04121	1.83377	0.180457	0.483001	0.459657	1.73061	1.34361	0.027246	0.757338	4.24989	yellow
JreChr01G11018	11.0594	2.80941	2.28993	0.395324	0.259277	1.95048	0	0.265507	0	0	0.171007	0	0	0	0	0	0	0	0	0	0	0	0	0	5.38626	0.868361	0.0885023	0.0570023	0	0	0	0	0	0	0	0	0.93262	12.4714	0	0.0382243	0	0.459148	0.8246	1.37733	1.10843	1.20363	20.4562	0	turquoise
JreChr01G11021	12.645	50.2118	47.9151	1.68876	2.88199	1.06076	2.3328	1.41306	4.17312	1.41965	1.88412	0.167522	0.197769	0.497188	1.64664	1.3654	1.30402	1.39093	1.30573	2.27374	0.719685	0.188633	0.539476	0.554594	36.924	1.87717	2.63966	1.15709	0.780531	1.35345	1.43305	0.427568	0.359692	1.3184	0.505786	1.62667	11.4987	24.9596	9.41246	3.79201	0.332176	15.1395	11.6919	10.7672	17.5078	14.1991	176.294	0.497508	turquoise
JreChr01G11022	25.3679	5.01187	4.18801	1.41433	3.84371	3.25031	4.74748	2.80023	1.91273	7.32405	2.78602	3.40388	2.6981	3.34252	2.01301	17.1406	10.9415	11.2171	52.262	26.6028	60.2935	28.5303	29.3884	43.5277	11.5226	2.83611	3.15348	4.50465	2.68454	13.0997	46.3861	33.8155	6.7745	4.61283	0.616449	5.05457	5.62656	16.1963	1.79818	9.59046	9.79946	0.560454	2.3514	1.5095	1.55538	1.18095	50.6532	1.89892	blue
JreChr01G11025	893.559	972.214	871.149	228.278	266.423	297.823	322.14	274.975	280.162	197.791	210.172	189.858	249.652	334.871	394.424	212.854	270.053	241.721	413.638	304.017	452.67	653.299	648.989	710.768	912.307	264.175	292.426	199.274	326.315	241.543	390.108	671.019	513.977	533.641	414.774	289.292	409.192	335.688	352.377	241.336	516.378	397.132	321.901	332.208	227.395	190.005	885.848	231.642	turquoise
JreChr01G11026	13.5085	12.3843	11.3553	11.5042	11.845	12.0118	8.01102	8.69985	5.72321	6.24718	5.2059	5.58069	6.95824	5.69468	7.93208	13.2252	8.72716	13.0235	18.9389	15.6551	20.6409	23.8278	22.3171	31.6	12.416	11.787	7.47803	5.67792	6.86167	11.6586	18.4117	25.9149	10.6137	13.7212	11.1671	10.0357	6.1002	6.64699	9.61272	8.43478	14.6099	8.21766	11.1329	12.5401	12.7045	10.6783	13.3136	5.26706	blue
JreChr01G11029	5.27419	2.56443	5.24491	5.42652	0.397624	6.73826	0.393757	0.293993	4.05706	2.89847	0.678954	1.44694	3.06924	0.715593	2.29891	6.49139	5.31451	6.39365	6.6024	6.65676	5.24264	11.2022	10.348	16.851	4.36118	4.18747	1.5816	1.67479	2.02791	6.06652	6.16726	12.8004	3.77066	3.29648	5.85451	3.95946	1.38675	1.90948	2.30144	3.14226	8.25837	7.67044	4.56676	3.99607	6.25779	7.35183	4.05043	0.436749	blue
JreChr01G11039	54.5217	77.6825	89.6075	23.3338	42.6416	25.9659	18.3859	14.7237	35.3841	22.3419	13.0063	26.2293	14.0753	17.2746	27.9368	23.6366	25.9714	30.8908	25.8077	20.9309	41.025	37.7969	51.6666	68.1819	73.9373	30.6471	22.8312	20.5258	19.7623	26.8329	29.2545	52.5485	34.7749	45.6281	19.7441	20.8295	37.2099	32.4921	25.1812	32.2718	45.7063	41.6853	50.5136	43.0805	31.716	33.9186	68.5551	14.3742	turquoise
JreChr01G11053	36.3861	28.8094	33.6481	38.3729	32.6753	39.451	53.9824	46.115	42.3029	33.6886	29.1686	35.8667	41.8612	38.3627	38.0024	47.9007	45.1857	43.3419	68.2358	55.271	77.8197	101.479	80.4487	128.428	32.9479	36.8331	47.4667	32.908	39.4088	45.4761	67.1088	103.452	36.5283	62.6647	49.8124	42.4668	27.6599	35.4443	42.0645	47.6321	61.2643	34.2052	38.2198	40.2437	46.2795	48.5462	34.544	36.2902	blue
JreChr01G11058	14.7911	14.1123	14.4224	5.82989	6.91333	7.43071	7.80574	6.09075	5.32172	4.72283	2.86744	5.75173	2.00422	2.68804	1.20172	9.5595	7.26195	11.8904	10.2217	9.31863	11.0866	14.1454	12.557	9.51124	14.4419	6.72464	6.40607	4.44733	1.96466	9.57061	10.209	12.0712	8.42242	6.68549	1.32967	8.37741	15.088	12.3097	12.5018	11.6422	13.0832	13.0775	12.9336	17.9273	16.5693	18.0974	13.91	4.61384	brown
JreChr01G11066	19.7522	4.66605	3.87867	1.16197	3.7239	5.11234	0.093884	0.023061	0	0.049246	0	0.106078	0.057414	0.148044	0.135863	0.262638	0.138242	0.160235	0.026361	0	0.072121	0.030794	0	0	9.43229	3.33274	0.0389817	0.0517747	0.113774	0.187038	0.0328273	0.0102647	0.089338	0.356559	0.056097	0.69272	0.173017	0.68085	0.023905	0.126145	0.04503	1.74854	0.437794	0.373837	0.315033	0.0973827	9.82894	0	turquoise
JreChr01G11068	637.576	329.264	94.1282	53.1418	56.1661	58.9231	34.0694	3.77024	7.59774	4.88558	5.77572	1.70573	13.5649	1.39408	3.24884	1.1641	0.242481	0.326152	0	0.104057	0	0.399417	0.04081	0	353.656	56.077	15.1458	4.12234	6.06929	0.577578	0.0346857	0.146742	97.4479	73.1489	13.7963	64.3566	4447.91	6908.59	2720.02	403.483	60.2071	19376.7	15852.6	6278.78	6545.73	8426.71	400.363	6.50231	turquoise
JreChr01G11069	27.696	22.8833	23.6064	38.1949	42.9846	86.5453	21.7392	15.6155	18.5924	12.7311	7.46255	10.3799	12.7661	12.9687	16.4831	22.557	19.623	23.7878	12.3205	18.4444	15.6739	13.6882	15.4912	25.2728	24.7286	55.9083	18.649	10.1912	14.0726	21.9893	15.4796	18.1507	28.4261	18.4235	12.869	22.2084	23.3742	19.5393	19.0741	19.6555	25.8371	36.0415	40.5563	32.6897	41.9572	33.7287	28.4267	13.8839
JreChr01G11074	35.3616	39.2097	30.7298	5.17944	8.721	7.73827	6.84744	6.38421	7.4837	5.62758	3.83538	5.25415	5.29122	5.58958	9.59709	6.03224	6.11125	7.46912	13.5716	6.8804	12.2878	16.2431	10.8247	15.4603	35.1003	7.2129	6.90511	4.90571	6.82596	6.53753	10.9133	14.176	14.1252	13.54	9.23394	11.0803	23.9277	20.0979	20.7775	14.3261	16.3148	25.6263	22.8505	22.8017	23.7912	21.5007	31.012	6.83997	turquoise
JreChr01G11084	100.006	67.9833	63.8505	13.8123	24.0951	25.2252	27.0585	24.1469	14.9392	10.243	14.5735	13.3145	18.5881	18.2191	6.52772	37.6152	21.0806	36.3833	59.609	53.2453	61.0489	75.8545	70.4772	128.481	77.28	21.0442	22.0482	12.7103	14.445	31.693	57.9677	91.6041	99.1143	53.7478	13.9178	22.1551	57.1918	74.2572	53.2757	46.5135	44.0326	313.269	378.911	353.149	288.403	302.661	71.2381	16.9384	brown
JreChr01G11109	5.26247	5.39822	4.70996	3.22311	2.67722	3.00626	2.68032	2.57996	0.146486	0.308394	0.269406	1.21372	1.64476	2.14916	1.53423	2.184	1.86745	2.0465	3.0739	2.6214	3.02364	4.06144	2.53503	3.78898	5.12355	2.96886	1.80225	0.597174	1.77605	2.03265	2.90631	3.46182	0.128604	2.86486	1.81141	4.17704	3.20982	2.70644	3.43893	3.85143	2.90288	1.97418	2.74132	3.12069	3.77902	3.54081	3.32425	2.15505	turquoise
JreChr01G11113	21.169	18.216	15.6925	2.25917	3.05839	1.88319	0.140242	0.474195	0.758905	0.045924	0.106777	0.056075	0.3198	0	0	0	0	0	0	0	0	0	0	0	18.3592	2.40025	0.457781	0.069592	0.1066	0	0	0	0.312248	0.19516	0	3.56752	0.320105	0.0178147	0	0.068311	0	0.00976733	0	0.121474	0.0381547	0.0409127	17.6028	0.0573293	turquoise
JreChr01G11211	4.83168	3.35864	3.91735	2.26935	2.02598	1.81365	1.01803	1.61709	2.01845	0.908381	0.014536	0.366494	1.09396	0.489532	0.001781	0.787622	0.750833	1.39251	1.85877	0.507178	2.04717	2.41806	2.77685	2.20163	4.03589	2.03633	1.55119	0.429804	0.528426	0.97699	1.47104	2.46551	0.684838	1.30946	0.645623	2.83547	3.74418	3.53213	2.31917	4.38338	3.01155	3.55686	3.98484	4.3208	4.19395	3.32156	3.1907	1.68591	turquoise
JreChr01G11215	144.43	135.932	122.089	39.3888	48.4293	46.7429	31.3724	45.7774	51.2575	41.1028	30.7399	45.8686	45.2681	48.2105	49.47	61.9024	52.5364	71.3941	56.3365	46.9725	64.3634	64.9164	74.6124	60.2445	134.151	44.8537	42.8025	39.2371	47.6495	61.9443	55.8908	66.5911	36.346	35.1936	47.9907	62.8417	123.861	95.2065	61.9837	65.3886	72.2916	83.5462	29.5441	84.9561	64.2906	48.7921	134.019	30.6156	turquoise
JreChr01G11222	4.9125	3.60419	3.28837	9.08708	4.57192	7.56428	7.22252	7.91196	7.7969	6.38495	5.0007	3.44109	8.03577	6.62118	8.32811	15.7553	13.3772	19.3361	1.85937	13.6656	22.3995	21.4107	21.4839	40.7844	3.93502	7.07443	7.64379	4.94225	7.66169	16.1562	12.6415	27.893	19.8258	8.94012	9.97791	12.5685	16.8216	19.7246	23.5012	44.7723	48.0538	9.36094	12.6225	11.4084	16.4494	13.4881	4.2267	9.89094	blue
JreChr01G11244	19.0016	20.8756	22.771	8.42756	9.84479	10.428	9.04635	8.07775	9.09813	5.06887	5.32817	6.55764	6.5075	4.71531	5.45653	9.31281	7.71155	7.10202	5.44192	6.40403	5.69121	9.18286	7.01185	6.77691	20.8828	9.56679	8.74075	5.65156	5.55978	8.04213	5.84572	7.65721	6.21762	8.52246	6.22151	8.51373	25.2237	22.4714	20.4557	20.3823	14.7512	26.2489	26.8861	28.4594	25.7904	20.4501	20.9772	6.95635	turquoise
JreChr01G11252	11.3847	8.26507	7.95321	1.46595	11.8435	2.12896	5.48979	1.24114	4.59808	4.66686	6.72552	5.319	2.58579	1.48911	2.95518	1.51794	12.3424	2.75804	2.40049	5.73886	9.8858	20.9114	13.251	15.6697	9.20101	5.14613	3.77634	5.57046	2.34336	5.53945	6.00838	16.6107	10.208	13.469	7.7898	2.58953	11.1785	9.17165	8.80012	8.39764	12.2685	6.05731	11.9521	7.23189	3.48175	8.99001	8.96804	2.25673	brown
JreChr01G11259	2.30921	1.46781	2.4558	2.41799	2.57536	1.98286	1.76214	1.63763	1.99057	1.79837	1.55901	2.15941	0.182762	1.87142	2.02802	4.90205	3.17176	6.23667	5.27414	4.17012	4.87897	6.13829	5.32815	8.12755	2.07761	2.3254	1.79678	1.83893	1.36074	4.77016	4.77441	6.53133	0.040815	2.35602	3.34191	2.27691	3.10366	1.59159	1.33361	2.27979	3.47215	2.90426	4.83862	3.11245	4.24633	3.79855	2.25522	1.49813	blue
JreChr01G11263	1.52301	1.13547	1.06494	0.209746	0.014858	0.036499	3.1285	0.0303	2.40247	2.41175	2.19068	0.023512	2.10106	1.98674	2.13437	5.33901	3.7285	3.69681	0.01314	2.32155	2.20201	1.93383	0.094768	2.62927	1.24114	0.0870343	1.85376	1.54198	2.07406	4.25477	1.51223	1.55262	2.34094	2.40101	1.39653	2.22415	1.21587	0.690207	0.399807	0.720798	1.41988	2.51416	3.07087	2.80996	2.3014	2.6357	0.952618	1.09472	green
JreChr01G11267	46.0817	23.2794	22.5423	417.491	499.445	390.964	241.937	216.795	243.289	241.767	172.75	270.974	212.535	384.323	298.048	516.471	462.349	511.063	836.99	537.141	807.375	801.627	767.387	1080.44	30.6345	435.967	234.007	228.497	298.302	496.628	727.169	883.153	591.339	431.259	230.941	548.297	0.203869	5.01549	14.9827	58.0383	205.107	0.004599	0.0269597	0.150244	0.704844	0.502517	66.1728	257.446	blue
JreChr01G11272	60.5004	58.9017	37.2914	0.107568	1.20879	16.4225	0.131559	1.72137	0	0	0.030193	0	0	0	0	0	0	0	0	0	0	0	0.006689	0	52.2312	5.91295	0.617643	0.0100643	0	0	0	0.00222967	0	0.128254	0	0.350216	29.4757	6.90797	0.46838	2.94019	0.451946	7.84576	1.89179	6.16429	4.21059	4.41222	56.3934	0	turquoise
JreChr01G11273	20.5232	17.5395	17.8479	9.50547	10.7348	12.2716	13.1733	13.3365	12.3291	3.55382	3.63919	2.92058	5.18314	5.03071	4.52043	3.57334	3.6705	3.88558	0.786256	3.12775	1.21257	0.797471	0.528325	1.13041	18.6368	10.8373	12.9463	3.3712	4.91143	3.70981	1.70886	0.818735	0.257448	5.01359	4.47722	10.0101	7.55048	6.78458	4.76987	8.67794	1.34506	5.44397	5.51045	6.77902	6.54687	4.68359	17.1842	4.29132	turquoise
JreChr01G11279	3.04219	16.9613	5.4164	16.4626	3.5033	2.18126	21.8414	17.3892	3.39524	1.08366	2.03605	1.55829	1.89317	1.12462	1.42972	1.60493	1.38865	2.01944	2.6662	2.30357	1.49038	41.8216	2.0965	1.5662	8.47331	7.38238	14.2086	1.55933	1.48251	1.67101	2.15339	15.1614	3.39617	3.14141	2.10812	3.35454	1.84055	4.99683	8.82175	2.19479	1.72894	2.26056	6.9712	2.60677	2.39803	6.3149	10.5417	6.57603
JreChr01G11335	0.372372	0.670536	0.32991	0.367876	0.029372	0.23967	0.200891	0.001286	0.000518	0.106296	0.00385	0.000294	0.006393	0.000609	0.001394	7.24117	0.875179	13.2875	1.41602	0.196185	1.63265	1.32687	0.641039	1.77023	0.457606	0.212306	0.067565	0.0368133	0.00279867	7.13461	1.08162	1.24605	1.02442	0.887724	0.102937	0.001896	4.53743	3.41399	2.33912	12.4072	20.8108	85.6486	59.4717	50.8234	50.7147	36.3215	1.09405	0.00216367	green
JreChr01G11340	6.91476	5.06876	5.50973	0.731528	1.05701	1.06784	0.772341	0.505163	0.80467	0.048709	1.22561	1.3027	0.305976	0.405053	0.09849	0.415376	0.078106	0.016033	0.007977	0.001358	0.007803	0.015685	0.02282	0.025535	5.83108	0.952125	0.694058	0.859005	0.26984	0.169838	0.00571267	0.0213467	0.486895	0.031116	0.453341	0.10668	4.19033	0.39564	0.284256	0.0673233	0.0433347	1.04597	1.42379	1.46949	0.786328	0.868877	5.47002	0.487803	turquoise
JreChr01G11345	64.9526	35.051	32.6248	15.1036	32.0799	15.5359	17.2034	12.2453	13.5794	19.8998	13.5483	10.0347	6.24493	8.99225	11.7592	25.0147	10.2154	14.4451	13.1998	14.2025	15.0778	19.6935	15.795	29.9818	44.2095	20.9065	14.3427	14.4943	8.99878	16.5584	14.16	21.8234	19.6855	44.5075	23.1238	14.7165	20.4826	29.8825	22.9381	26.5879	28.8574	18.5488	22.9516	29.6547	20.4688	20.3159	40.5361	11.711	turquoise
JreChr01G11349	58.8359	49.4397	52.1457	42.5222	50.2405	46.5731	10.9978	18.3722	16.6541	14.5472	19.8469	24.0442	12.9061	11.7687	13.321	4.16692	7.5721	5.47744	11.9208	18.0019	25.352	8.40301	12.5923	5.52017	53.4738	46.4453	15.3414	19.4794	12.6653	5.73882	18.4249	8.83848	20.0636	26.7318	29.0402	42.1278	46.688	35.0933	24.2022	46.8428	41.0443	58.0102	28.8617	26.3645	37.3783	20.5752	38.8716	11.1052	turquoise
JreChr01G11363	0.243852	0.411846	0.239669	0	0.019735	0.018511	1.68328	2.7522	3.05853	0.82995	2.62659	1.59611	3.92269	6.80448	3.21821	7.2448	9.1082	8.70403	7.65883	11.7777	11.359	18.8444	21.1587	20.7424	0.298456	0.0127487	2.498	1.68422	4.64846	8.35234	10.2652	20.2485	11.1764	1.8319	22.4523	7.90257	9.2428	9.54491	11.8106	9.54472	16.7743	0.219083	0.447029	0.77132	2.16451	2.58415	0.210668	4.06037	blue
JreChr01G11377	25.963	16.2291	18.6226	10.5051	6.61453	5.46038	8.37153	9.30328	9.44346	4.66338	6.50807	5.47134	4.77897	8.09799	6.30938	9.43842	7.75392	9.15876	5.99164	7.81664	7.3424	9.22884	8.01422	12.0026	20.2716	7.52668	9.03942	5.5476	6.39544	8.7837	7.05023	9.74856	16.589	9.78205	7.91733	8.96655	6.37948	6.72611	6.15966	6.02637	9.46306	4.20586	2.58743	3.66173	2.70861	2.1367	15.0339	8.99767	turquoise
JreChr01G11379	2.78041	2.96885	2.55014	0.375863	0.140301	0.342145	0.211609	0	0.658014	0.899629	0.512346	0.670072	0.744219	1.02383	1.02774	7.38418	3.24324	4.5027	1.18238	1.33022	2.38153	0.510666	0.132436	0.603386	2.76647	0.286103	0.289874	0.694016	0.931929	5.04337	1.63138	0.415496	0.095811	0.379658	0.375185	0.178854	44.6482	5.57959	5.05842	7.4232	1.72983	21.7213	9.51379	11.2527	19.0896	18.8202	2.80181	0.850808
JreChr01G11381	10.0782	7.6019	6.9434	0.823507	1.28672	1.80694	2.59926	1.38702	1.75612	1.84329	2.19722	2.32313	1.91402	2.35167	1.75517	7.15975	4.11609	5.62931	5.80496	5.0027	6.71018	5.69576	5.33445	9.90588	8.20784	1.30572	1.91413	2.12122	2.00696	5.63505	5.83928	6.9787	7.65652	2.24958	1.13526	1.88631	15.3909	10.4552	5.36477	14.13	6.04503	9.70717	10.3942	12.4846	9.13969	10.3893	8.37709	1.28159	brown
JreChr01G11408	30.1022	10.963	12.5017	4.71596	5.73784	5.82439	4.35459	2.77176	2.56671	2.04389	3.80669	3.67898	1.64027	1.86616	4.59215	2.77105	0.987011	2.76287	3.88041	2.50131	3.57628	6.25606	6.63733	5.74565	17.8556	5.42606	3.23102	3.17652	2.69953	2.17365	3.31933	6.21301	3.95413	1.93026	1.77682	5.20721	3.26635	5.02851	6.31823	3.73921	5.73809	10.7031	8.9727	6.80684	6.73678	6.59889	5.22858	1.30513	turquoise
JreChr01G11413	120.719	52.4957	79.2216	58.7145	38.5736	52.85	69.0014	52.1906	79.3147	134.61	132.508	124.085	206.597	137.268	170.62	261.791	268.649	214.977	442.979	553.976	372.848	470.302	352.067	678.155	84.1456	50.046	66.8356	130.401	171.495	248.472	456.601	500.175	197.408	214.232	180.117	82.8062	149.413	578.528	373.341	304.307	233.968	117.426	144.034	178.393	146.187	98.1017	75.3565	104.458	blue
JreChr01G11414	2.24791	2.98413	3.38262	2.79616	2.55086	2.37284	16.4192	12.5065	19.3918	21.4206	12.0633	22.3875	31.9931	19.687	24.4244	52.1511	16.9613	34.5923	20.9663	18.5611	26.4002	23.129	20.0031	13.0885	2.87155	2.57328	16.1058	18.6238	25.3681	34.5682	21.9758	18.7402	25.7034	40.1884	12.6232	8.47123	6.63756	151.321	277.902	210.692	63.561	140.856	148.636	210.663	340.853	300.927	3.07182	10.3512	green
JreChr01G11415	19.6825	17.1417	18.5085	6.43266	8.03433	8.82192	8.26082	5.13056	4.99416	6.4802	3.98553	3.79777	5.10333	4.88456	4.55199	13.2505	9.40236	14.3436	10.7649	11.7035	14.5587	13.5144	12.9201	13.3795	18.4443	7.76297	6.12851	4.7545	4.84663	12.3321	12.3424	13.2713	12.7083	9.82644	6.00169	3.30448	24.1371	27.0484	23.9991	24.0954	15.4873	20.2602	20.1378	26.8256	27.1647	27.7025	19.2186	6.01513	brown
JreChr01G11418	15.0836	8.65685	9.81565	0.396185	0	0.241394	1.25952	1.4694	0.921891	0.604118	0.372847	0.277922	0.270346	0.373826	0.111896	0.561803	0.136338	1.06584	0	0.423337	0	0.077577	0	0.511758	11.1854	0.212526	1.21694	0.418296	0.252023	0.587992	0.141112	0.196445	4.11238	3.29361	1.16348	4.27032	62.1044	587.871	255.549	39.9701	2.68168	1.47107	1.79251	6.31363	9.35829	4.99305	78.2311	0.239844	turquoise
JreChr01G11422	0	0.064146	0	0.795768	0.701443	0.228975	0.726509	0.393839	0.086814	0.55197	1.0154	1.01034	0.323475	5.71813	0.173744	0.047621	1.17607	0.842318	2.31544	0.665439	2.40648	13.1756	10.344	4.61113	0.021382	0.575395	0.402387	0.859237	2.07178	0.68867	1.79579	9.37691	43.4801	49.3751	14.3708	0.634164	1.23622	0.059072	0.141919	0.308422	2.69695	0.0863977	0	0	0.152869	0	0	2.27301	blue
JreChr01G11428	27.1613	22.9526	24.7282	33.8411	42.7248	40.535	29.8528	36.5024	34.2219	29.1071	29.1251	34.1855	31.0493	28.4424	32.8098	38.6627	38.3338	38.541	84.3724	60.6592	91.0586	70.267	67.0828	47.218	24.9474	39.0336	33.5257	30.8059	30.7672	38.5125	78.6967	61.5226	38.2827	44.0166	35.3073	50.1177	25.7693	31.7962	40.2134	32.588	41.2365	29.1218	28.3163	28.5041	27.6326	32.8157	25.9527	27.3439	blue
JreChr01G11432	11.6584	12.1641	10.293	0.317981	1.00221	1.21445	0.536581	1.01767	2.94267	3.25908	3.39922	5.00092	0.953574	1.4838	1.92682	10.1453	5.26643	3.13681	3.88798	2.1377	5.81378	9.68731	8.45727	7.22623	11.3718	0.844881	1.49897	3.88641	1.45473	6.18285	3.94649	8.45694	7.44291	5.72913	4.8393	1.09965	11.3872	18.5031	24.1287	52.1504	35.6771	14.779	25.6911	13.3176	15.6512	54.8432	12.744	0.617266	brown
JreChr01G11436	90.6846	111.917	84.8533	22.9196	12.15	31.8021	24.6299	18.899	26.2854	13.9555	15.8817	15.6763	13.6144	16.6379	14.1084	15.1542	13.1942	11.0078	13.2825	10.7977	16.9696	11.0993	13.2483	15.8756	95.8184	22.2906	23.2714	15.1712	14.7869	13.1187	13.6832	13.4078	17.0079	26.8938	21.2504	26.9121	34.8884	6.4714	4.24122	7.11821	9.32103	81.1476	53.0051	25.019	17.1228	9.29703	76.9286	10.1878	turquoise
JreChr01G11437	22.769	25.8691	28.4482	29.3615	26.2037	37.3459	29.0496	25.497	24.2398	6.50942	10.3056	10.482	10.4974	10.6171	10.2296	10.9157	8.05873	9.89439	7.84703	10.8101	14.9353	11.084	14.7573	14.7932	25.6955	30.9704	26.2622	9.099	10.448	9.62295	11.1975	13.5448	22.7113	28.5801	16.5975	26.8799	41.257	55.4994	35.8369	35.2107	31.6369	27.5162	29.0565	26.8838	28.8768	29.0933	22.9825	13.087	turquoise
JreChr01G11441	35.9322	34.5299	23.9326	8.54097	14.7274	15.3066	22.104	20.0289	9.76041	4.62312	6.98816	5.35183	8.30478	6.23263	11.2084	9.68875	7.16116	7.1379	9.43056	12.2326	10.2978	19.5016	12.2832	19.9961	31.4649	12.8583	17.2978	5.65437	8.58195	7.99594	10.6537	17.2603	41.6354	36.8143	14.4891	11.72	8.58527	2.40489	1.93638	4.48362	40.4615	17.2429	6.33773	5.88024	15.9154	8.98721	43.6486	4.19449	turquoise
JreChr01G11447	55.9677	55.5419	46.7449	5.02508	4.85137	7.54652	4.51197	3.11829	3.16176	8.35985	6.43309	5.94571	2.4146	3.68495	2.4717	4.29291	3.37567	3.37785	5.64045	4.16542	8.64455	1.89464	3.4566	2.58095	52.7515	5.80766	3.59734	6.91288	2.85708	3.68214	6.15014	2.64406	7.56118	6.63589	1.6048	5.59042	6.55093	1.11616	0.292536	0.891986	0.390868	17.1395	28.3461	27.4992	21.8482	27.8034	40.0003	2.73793	turquoise
JreChr01G11450	1.12049	1.25024	0.955606	1.75699	0.896374	19.8485	0.233445	23.788	1.56095	18.1702	21.0577	20.4537	20.9172	20.264	18.3505	18.9828	19.4099	19.4585	30.2089	13.8599	30.566	30.2966	30.7375	20.9966	1.10878	7.50061	8.52747	19.8939	19.8439	19.2837	24.8782	27.3436	29.8134	35.4193	20.9594	25.1726	33.356	22.8315	23.8182	17.9631	21.8805	17.8741	8.65207	26.0495	21.6044	16.3575	21.5558	18.1986	green
JreChr01G11453	26.7947	33.1982	28.1126	11.9158	17.2886	14.6634	9.64042	11.0444	12.4359	7.26012	11.6945	12.3463	9.51106	10.7359	7.91838	15.37	13.3403	22.1626	25.2218	23.6758	30.6129	28.6965	30.0826	35.6413	29.3685	14.6226	11.0402	10.4336	9.38845	16.9577	26.5035	31.4735	21.4917	26.5817	15.1499	23.8822	24.7549	37.2292	28.1286	30.4894	30.5046	23.9558	23.274	24.2465	24.5086	19.8651	24.2769	9.7308	blue
JreChr01G11457	38.4005	40.2263	38.8796	23.3179	29.5179	26.6706	6.97722	9.8718	10.8852	7.14606	7.62111	6.93994	7.97297	8.80162	3.80556	15.5472	11.6284	17.2171	37.1555	4.05676	47.8416	48.0216	44.624	74.8412	39.1688	26.5021	9.24473	7.2357	6.86005	14.7976	29.6846	55.8289	64.2348	32.8151	7.69285	15.2682	57.8606	82.3365	36.7679	74.8817	25.1189	251.516	100.842	61.0655	70.2338	31.6056	42.0468	3.20804	brown
JreChr01G11459	11.3667	11.5573	11.1931	6.40894	1.69911	7.17168	1.09809	5.56184	4.84391	2.37367	2.35961	2.67179	2.88632	1.6519	1.8699	2.87929	1.71623	3.40068	4.375	3.16545	4.72965	6.18036	6.24007	2.9438	11.3723	5.09324	3.83461	2.46836	2.13604	2.6654	4.09003	5.12141	7.04599	6.95638	2.13057	5.20363	13.7068	11.3165	9.64263	12.2457	11.8054	17.6484	19.2055	18.3173	17.6417	16.9649	11.1775	3.84391	turquoise
JreChr01G11460	7.14	5.22156	6.68525	0.413785	1.15336	2.03613	0.005824	0.025487	0.003834	0.002736	0.004703	0.000605	0.007153	0.020141	0	0.017168	0.008007	0.006165	0.006822	0.005799	0.004066	0.008193	0.003411	0	6.34893	1.20109	0.011715	0.00268133	0.009098	0.0104467	0.00556233	0.003868	0.001861	0.000869	0	0.005239	3.89484	0.225713	0.0156527	0.012857	0.0143623	0.686945	0.0238447	0.398106	0.163327	0.0239237	7.62871	0.0125037	turquoise
JreChr01G11461	35.3091	33.4071	48.2873	26.2117	17.1078	25.3487	19.3648	18.5424	26.3335	19.9701	19.6679	18.7873	17.7396	13.4739	18.4104	17.0063	20.2554	24.2656	15.1066	14.8635	19.0397	12.3899	11.3186	8.15376	39.0012	22.8894	21.4136	19.4751	16.5413	20.5091	16.3366	10.6207	12.6515	12.8355	16.3042	29.7066	27.3469	30.3477	28.7273	31.7577	24.1436	20.0078	26.1166	29.1307	27.2087	32.3747	29.6822	16.4552	turquoise
JreChr01G11464	9.63521	12.1021	12.0851	6.24108	5.56462	7.90859	6.56733	3.47221	5.99382	6.8415	4.57541	6.296	6.91258	6.2771	7.18695	18.0441	15.4013	19.8841	55.8795	43.8926	62.4662	64.9107	57.497	51.3243	11.2741	6.57143	5.34445	5.9043	6.79221	17.7765	54.0794	57.9107	39.8497	28.5564	19.2948	7.4971	23.6691	36.6294	28.0746	25.9446	33.1342	44.9739	35.6003	34.483	31.9424	28.0559	10.5928	6.6913	blue
JreChr01G11465	25.004	17.8672	16.8571	7.90638	10.4059	9.25255	7.1197	7.15055	7.53865	4.52377	3.99835	5.15754	5.33129	4.56195	4.78229	7.80999	7.88665	8.3508	13.8477	10.924	14.1882	14.15	11.6632	17.1964	19.9094	9.18827	7.26963	4.55989	4.89184	8.01581	12.9866	14.3365	5.80044	6.14623	6.11626	7.78268	23.9559	18.7429	17.8994	19.1242	22.1443	23.4335	20.777	22.1895	19.9247	19.3792	21.3747	5.69897	brown
JreChr01G11472	13.5591	17.3321	19.0052	13.3534	12.8087	15.5719	0.175154	8.78375	1.30321	3.55216	3.75014	0.912703	4.04848	4.49298	0.179517	0.825356	4.62665	6.96656	3.1869	4.29011	3.4712	0.775457	0.236142	0.756545	16.6321	13.9113	3.4207	2.73834	2.90699	4.13952	3.6494	0.589381	0.247086	4.75579	3.72591	9.64198	12.417	2.14961	2.00914	1.03966	0.348244	1.46126	1.47918	2.95677	2.10234	1.39102	22.9598	1.80747	turquoise
JreChr01G11474	36.7633	1.26257	30.7076	14.6856	10.1454	11.8887	1.20423	13.9902	0.925043	13.2601	1.41357	1.58213	1.91109	1.04248	2.1493	13.5792	1.49867	1.44445	14.0967	13.4048	20.602	17.6346	2.16946	26.1809	22.9112	12.2399	5.37314	5.41861	1.70096	5.50743	16.0345	15.3283	25.6785	1.89662	1.39807	16.7875	11.8959	19.4049	25.2368	14.2264	15.245	16.0359	9.02781	0.843629	12.8654	20.2451	11.2286	6.85657	brown
JreChr01G11475	66.4248	74.6324	74.6379	32.1058	29.7672	39.8711	26.2495	17.7606	12.9419	6.30265	8.93849	5.13156	5.52509	6.56983	4.97429	6.13285	4.93401	9.56288	4.60163	3.79002	4.19749	3.05329	4.3935	0.71263	71.8983	33.9147	18.984	6.7909	5.68973	6.87658	4.19638	2.71981	2.96004	17.1905	4.86562	12.9283	38.7942	7.23486	2.03215	4.00184	0.604419	3.4759	2.7704	6.823	6.31273	3.95181	78.8401	3.09969	turquoise
JreChr01G11479	30.1675	35.9364	33.2818	22.8476	20.026	18.3732	19.9227	14.2317	8.82999	10.9157	8.16091	7.0077	5.90526	6.84223	9.6313	11.796	9.64144	13.7427	32.6538	23.0531	39.6741	37.1589	42.0401	47.579	33.1286	20.4156	14.3281	8.69477	7.4596	11.7267	31.7937	42.2593	73.9456	67.5759	10.7853	15.2518	141.633	147.02	146.577	129.58	91.0421	95.4931	151.514	115.707	99.8453	86.6035	45.8868	6.44565	blue
JreChr01G11480	55.2041	61.1566	46.3293	26.3126	32.3184	43.5393	22.7525	20.0149	17.4351	6.73597	8.07453	8.83124	6.60627	7.45329	10.7642	16.8745	13.2782	14.9458	27.9877	16.2059	22.9774	18.8515	30.9707	25.3009	54.23	34.0568	20.0675	7.88058	8.27458	15.0329	22.3903	25.041	31.9582	17.4259	10.6809	19.884	38.2175	17.2981	9.88069	13.4596	16.0067	18.2539	16.121	25.1798	19.8844	9.42297	62.7562	9.8421	turquoise
JreChr01G11487	6.12277	4.80396	3.98529	0.140044	0.075638	0.796608	0.680565	0.099308	0.004506	0.007327	0.003352	0.071086	0.00207	0.340985	0.002253	0.194882	0.58913	0.627242	2.11417	0.108363	1.38	0.649668	0.934972	1.3852	4.97067	0.33743	0.26146	0.027255	0.115103	0.470418	1.20084	0.989947	0.003772	0.002068	0.270891	0.122282	2.98228	0.547442	0.002414	0.368399	0.489727	0.973863	0.335762	0.866135	0.32539	0.274763	5.61798	0.019029	turquoise
JreChr01G11488	10.2638	8.09829	5.95815	2.302	1.69043	1.90305	1.8995	2.39467	1.87092	2.43423	5.41508	6.11433	2.71274	5.20609	3.11359	2.65816	4.81605	6.10557	14.6173	7.8216	15.8304	21.6796	16.1577	22.9621	8.10675	1.96516	2.05503	4.65455	3.67747	4.52659	12.7564	20.2665	17.016	15.4451	6.65963	4.09733	11.6841	20.0199	20.5832	19.6884	17.3462	9.33832	9.90007	7.80508	7.32676	7.02865	7.33548	3.34717	blue
JreChr01G11495	3.7173	0.199475	2.4888	1.29816	2.29821	1.94064	3.29861	1.86935	3.02116	0.197605	3.58879	1.81406	0.118943	0.209388	1.09125	4.87127	1.80827	4.17529	4.57193	3.12754	4.15826	8.86512	7.30654	9.95695	2.13519	1.84567	2.72971	1.86682	0.473193	3.61828	3.95258	8.70954	10.2826	9.43666	3.50393	3.42545	7.55885	25.3072	4.27304	21.4672	10.4176	7.34158	5.16916	10.0933	19.1692	28.5832	3.10681	4.05199	blue
JreChr01G11508	1.79019	0.888629	1.27406	1.23583	1.26154	1.05068	10.4638	10.5521	9.84507	0.877528	6.91565	1.47504	2.15355	1.60205	1.17054	1.84225	2.53991	2.34473	1.28658	1.38021	1.09397	1.15487	1.54437	1.62919	1.31763	1.18268	10.287	3.08941	1.64205	2.2423	1.25359	1.44281	1.10734	0.688857	1.00096	2.22217	1.92561	7.24386	8.93192	1.65146	1.2404	2.36533	1.90366	1.74471	2.15528	3.1156	1.6654	4.15197	red
JreChr01G11514	18.6262	9.26922	8.47801	3.3887	3.0122	7.09133	7.6345	2.91229	5.28338	2.85575	3.30709	4.28904	6.2387	2.16807	3.57523	3.48775	2.86992	5.51807	5.42256	7.00727	6.42113	6.4804	3.86713	6.88685	12.1245	4.49741	5.27673	3.48396	3.994	3.95858	6.28365	5.74479	5.00508	7.40221	3.04514	5.2026	7.42147	8.23357	14.2644	7.125	10.4097	14.1789	14.1023	16.0677	19.0502	13.0791	12.2886	6.53573	turquoise
JreChr01G11516	13.371	9.85727	12.5456	4.33055	4.43935	4.22497	4.81216	4.29713	5.44733	2.55793	3.28571	3.5891	3.09665	3.62314	3.19787	3.84693	4.99149	6.39087	8.65749	6.49347	6.82076	10.0556	11.7247	6.75587	11.9246	4.33163	4.85221	3.14425	3.30589	5.07643	7.32391	9.51207	9.02528	10.7345	2.24909	5.0944	18.2507	28.0018	19.9641	16.6986	13.4029	17.3463	24.5204	26.6023	32.7958	36.5519	9.40285	3.94725	brown
JreChr01G11520	2.73778	1.50975	1.79755	1.14589	1.49481	1.19709	1.23391	0.82989	1.74885	1.70365	1.82861	1.57465	0.83749	0.543531	1.47547	2.148	2.85808	2.61261	5.12584	4.90434	3.74931	10.5214	6.37058	1.92519	2.01503	1.27926	1.27088	1.7023	0.952164	2.53956	4.59316	6.27239	3.78852	0.875285	1.6785	3.51766	1.56332	1.01348	2.05061	1.69993	4.92932	1.06358	1.28575	1.29864	1.29891	0.961854	1.67717	1.61834	blue
JreChr01G11525	26.1009	31.5442	34.0258	0.097719	3.61836	8.54545	12.1057	10.1074	13.6935	1.47097	4.39025	0.696599	6.93962	9.62498	8.73723	4.85878	7.01594	4.5779	0.006566	0.790396	0.542598	0.006468	0.005482	0.010391	30.557	4.08718	11.9689	2.18594	8.43394	5.48421	0.44652	0.007447	2.00222	4.72854	2.95767	9.28905	1.3698	0.934461	0.326382	0.420717	0.00547667	8.67214	3.47683	4.76341	1.30797	0.65808	32.7986	8.23331	turquoise
JreChr01G11534	94.4291	117.718	149.394	129.78	128.042	110.454	40.0531	49.7064	36.6041	44.9347	40.3138	33.7136	32.1021	31.9716	30.5503	10.016	12.3022	12.223	27.048	20.2071	22.8828	23.7752	31.0481	13.1003	120.514	122.759	42.1212	39.6541	31.5413	11.5137	23.3793	22.6412	161.649	159.651	47.7015	56.6396	103.278	41.5493	27.543	25.3444	21.1381	237.424	188.457	117.478	62.065	38.994	119.527	41.285	turquoise
JreChr01G11539	0.003192	0.008817	0.000946	0.01655	0.001192	0.007656	0.081532	0.000664	0.180763	0.023594	0.005667	0.14002	0.24612	0.575783	0.512199	0.352524	0.614569	0.857196	3.89551	1.51423	6.63028	2.69862	5.31332	2.97221	0.00431833	0.008466	0.087653	0.056427	0.444701	0.608096	4.01334	3.66138	1.34095	2.62804	0.632507	0.005567	1.6981	3.10668	3.96311	5.69373	12.5082	13.3544	15.2858	13.9467	13.7191	12.5891	0.00217767	0.0612633	blue
JreChr01G11540	0.739582	0.285827	0.63113	0.646834	0.203497	0.218856	2.59227	1.17612	1.84165	4.1169	5.32829	4.57246	16.803	4.38662	3.37955	4.48887	4.08403	3.08715	1.68903	2.30333	3.46621	2.67363	2.36655	2.20963	0.55218	0.356396	1.87001	4.67255	8.18971	3.88668	2.48619	2.41661	41.2926	38.8874	9.72174	4.5996	18.8945	795.562	2036.49	1269.38	1025.99	3.1991	11.8253	11.985	40.3814	43.2786	0.192753	2.27606	green
JreChr01G11547	10.3716	4.61627	5.20336	2.71315	3.15466	3.51524	3.28745	1.7531	1.10891	1.84093	2.06124	1.79536	4.18	1.67918	2.16826	7.88992	4.11719	9.98711	12.1259	13.7008	13.5254	9.75396	10.5286	27.6147	6.73043	3.12768	2.04982	1.89918	2.67582	7.33141	13.1173	15.9657	11.386	12.8251	8.66375	3.0747	57.8724	63.9581	84.2539	98.1389	368.236	112.082	236.172	181.398	282.17	439.606	9.25741	1.90746	blue
JreChr01G11548	7.57982	2.68805	6.49063	17.7443	0.706942	17.1498	21.7376	17.1977	20.9934	19.8379	22.1574	20.0667	20.5972	22.6511	20.5899	17.2419	17.695	18.3147	11.4483	12.9703	10.692	9.03494	10.6703	16.0196	5.58617	11.867	19.9762	20.6873	21.2794	17.7505	11.7035	11.9083	0.557346	15.9122	26.4378	20.1792	48.9896	69.1697	58.0113	72.7531	32.7735	37.8712	51.3491	55.7323	78.6322	69.4733	9.94944	19.3837	green
JreChr01G11553	857.834	918.225	1014.53	1065.95	973.21	1294.59	661.229	395.412	1109.9	768.491	778.476	495.671	431.519	477.047	545.547	496.188	597.926	710.692	309.353	395.78	384.242	113.225	219.699	205.495	930.195	1111.25	722.179	680.879	484.705	601.602	363.125	179.473	208.959	557.267	546.469	654.901	270.852	257.467	187.848	271.83	148.393	107.083	70.1862	181.362	188.963	148.109	624.871	760.297	yellow
JreChr01G11554	46.0641	48.7668	50.1961	0.935068	2.17508	5.62878	0.149702	0	0.23924	0.081806	0.146991	0	0	0.102764	0.024892	0	0	0.103976	0	0.08732	0	0	0	0	48.3423	2.91297	0.129647	0.0762657	0.042552	0.0346587	0.0291067	0	0	0.024716	0	0.63975	6.72701	0.552727	0.31826	0.179045	0.211083	139.383	55.7661	37.6654	15.9089	6.74496	51.1655	0.013108	turquoise
JreChr01G11555	11.8927	3.25377	3.29696	0.124785	0.770757	1.77711	0.016374	0.000574	0.352301	0.000861	0.000512	0.000721	0.001964	0.001168	0.00137	0.000659	0.000258	0.238629	0.006742	0.000444	0.001261	0.043074	0.000654	0.007498	6.14781	0.890884	0.123083	0.000698	0.00150067	0.0798487	0.00281567	0.0170753	0.007633	0.003612	0.003117	0.003274	6.24282	0.000569667	0.000672667	0.000729667	0.0146303	0.886587	0.001706	0.603694	0.135855	0.004145	7.48558	0.008816	turquoise
JreChr01G11559	3.63005	0.833206	0.796677	9.58104	1.93842	4.97994	0.493651	1.02158	1.44447	0.176779	3.75622	1.47483	0.217566	0.863147	1.08458	1.01581	2.75419	7.09246	6.57224	0.186401	7.0728	2.23505	10.7372	9.54265	1.75331	5.4998	0.986564	1.80261	0.721766	3.62082	4.61048	7.50498	0.975473	0.903171	3.27759	2.28274	0.394394	3.16096	5.41707	4.07313	0.244424	0.376522	0.245016	0.288509	0.233398	1.61946	2.90592	0.975251	blue
JreChr01G11572	50.3873	52.1818	84.8612	12.8676	12.9207	27.4846	14.8514	1.86331	13.8616	0.690475	16.9923	16.2527	15.2081	20.7106	0.467577	13.0949	21.1333	2.41341	7.13337	0.830542	11.2767	6.46303	8.46641	12.2955	62.4768	17.7576	10.1921	11.3118	12.1288	12.2139	6.41355	9.07497	0.897806	2.55218	21.2007	0.617337	38.3249	17.2837	6.73178	14.1831	5.90321	17.4775	14.2593	10.7956	11.098	7.34118	41.8981	10.7395	turquoise
JreChr01G11575	0.004431	0.004158	0.003668	0.00693	0.062778	0.002624	0.63292	0.009848	0.568068	1.42509	1.15033	1.51309	3.2711	3.42785	3.29694	3.11314	3.58081	4.04951	2.85034	1.28558	2.47036	5.35604	5.88271	3.58591	0.00408567	0.0241107	0.403612	1.36284	3.33196	3.58115	2.20209	4.94155	10.1562	5.3279	1.24196	0.003239	249.361	20.6648	4.14388	3.38004	1.73358	18.4204	5.09358	5.19434	2.31086	7.079	1.06163	2.90939	blue
JreChr01G11576	14.2129	9.26111	8.87353	13.5823	12.5658	9.1235	12.5927	15.2782	10.0713	9.0629	7.76754	6.76981	8.64461	9.85644	6.12592	10.0184	7.09819	10.211	7.06058	3.10437	3.83873	1.0996	2.58025	4.53617	10.7825	11.7572	12.6474	7.86675	8.20899	9.1092	4.66789	2.73867	8.00886	15.8394	7.65052	9.16449	5.40397	5.67843	5.37003	6.198	1.84452	13.2756	11.6459	7.78973	5.08959	5.68477	16.3427	14.32	yellow
JreChr01G11581	8.11374	10.882	8.3599	25.3172	9.21731	12.5348	104.859	59.5186	54.1092	33.7015	35.2575	27.62	30.9345	31.5384	26.8869	15.914	14.1863	10.6175	3.57965	7.78051	1.15433	1.09579	1.96028	1.00779	9.11856	15.6898	72.8288	32.193	29.7866	13.5726	4.17149	1.35462	11.2793	23.6173	34.4639	13.1906	78.4181	61.7639	54.9036	64.5043	0.814745	10.7077	4.13185	6.40214	3.08653	0.362723	5.4577	72.7758	red
JreChr01G11584	15.0313	17.2683	19.7599	10.9585	8.9205	9.1669	10.2059	7.16602	7.45101	4.66469	4.17962	7.07961	4.54417	2.77818	5.36888	2.33919	3.00073	2.81695	3.37274	4.21729	5.00415	6.39781	4.00173	3.12225	17.3532	9.68196	8.27431	5.30797	4.23041	2.71896	4.19806	4.50726	4.68543	10.3233	3.51247	9.85214	8.9955	17.2735	14.609	8.99466	6.73778	15.0222	14.7207	10.9834	15.4201	12.1245	16.9507	6.55103	turquoise
JreChr01G11585	105.226	40.8397	75.6204	27.6175	31.4971	39.4661	40.2465	32.8568	26.9498	13.7388	18.9393	18.1041	8.84427	10.6027	8.05143	16.7109	12.5169	10.776	2.8846	6.15403	4.2837	2.45636	5.29833	6.06866	73.8953	32.8602	33.351	16.9274	9.16612	13.3346	4.44078	4.60778	20.9459	14.1336	0.939147	25.1581	95.6234	100.857	92.3981	142.747	90.0301	116.831	162.871	127.321	136.177	130.312	86.6837	11.4043	turquoise
JreChr01G11599	10.2026	6.08615	7.61336	4.41614	3.6547	5.1072	3.46091	0.185473	3.75645	1.2038	3.16365	2.37011	2.40863	6.88625	4.54249	7.28634	7.19859	7.31041	11.3248	8.16857	9.8375	12.6104	9.66825	15.7565	7.96739	4.39268	2.46761	2.24585	4.61246	7.26511	9.77694	12.6784	11.9534	8.08131	7.16563	5.0571	6.94288	8.59438	7.70589	8.26156	10.0185	5.75115	7.19073	5.79366	6.78697	4.88146	7.53392	3.03706	blue
JreChr01G11600	18.5247	19.486	19.9099	27.1363	35.0609	19.72	22.0341	17.7865	24.1161	16.6108	15.3632	19.8175	21.7953	23.3418	20.2944	34.1815	36.9479	34.7566	61.132	49.6625	78.3313	102.368	84.5969	70.5963	19.3069	27.3057	21.3122	17.2638	21.8105	35.2953	63.0419	85.8538	38.4041	30.3742	33.7179	31.568	17.241	26.4863	27.2185	32.1685	45.9708	21.398	28.8283	27.6748	28.9225	34.7611	17.9419	22.0484	blue
JreChr01G11605	2.95913	4.7085	4.05273	1.53527	2.59685	1.93678	1.78088	2.47487	1.69058	1.22641	1.76737	1.52809	1.29219	0.535112	1.12226	3.59223	2.4503	4.05532	6.92943	4.21413	6.24046	9.63921	6.09404	2.38937	3.90678	2.02297	1.98211	1.50729	0.983185	3.36595	5.79467	6.04088	0.735714	3.13252	1.10217	1.73169	3.44168	2.50371	2.00128	2.38585	5.38509	2.4223	2.6071	3.30106	2.49168	2.18288	4.07742	1.44995	blue
JreChr01G11632	9.52341	7.52439	12.4725	16.6449	19.6227	17.3449	0.445435	0.460399	8.20774	8.27876	9.94348	9.08127	5.07452	2.77755	11.2241	29.2223	17.9023	18.1362	2.29937	2.46585	0.098927	13.8151	2.75095	2.23459	9.8401	17.8708	3.03786	9.10117	6.35873	21.7536	1.62138	6.26687	19.3677	16.4273	14.0377	11.8602	18.1681	11.0537	4.36658	8.64585	2.47759	15.0074	14.6163	18.8396	11.8753	10.8213	24.2438	4.15551	yellow
JreChr01G11643	171.953	127.622	170.812	231.143	189.814	288.716	279.173	226.654	4.21305	250.989	231.55	218.793	209.324	214.44	199.001	140.268	249.202	163.913	94.1302	125.15	89.4469	135.956	129.429	174.205	156.795	236.558	170.013	233.777	207.589	184.461	102.909	146.53	142.94	3.19151	298.02	255.717	61.3168	73.4072	53.1618	109.91	186.082	294.992	311.402	320.262	538.784	525.113	176.793	207.985	yellow
JreChr01G11648	21.0163	20.1261	13.3856	6.20038	7.32965	9.46816	4.04288	5.66471	3.66037	4.72502	4.7743	3.2504	3.57854	5.35278	4.06734	4.99432	5.54557	6.20837	8.38837	6.69693	8.29832	8.52965	7.57632	10.5134	18.176	7.66606	4.45598	4.24991	4.33288	5.58275	7.79454	8.87312	7.80173	6.54546	5.47491	7.60981	21.8154	25.704	24.5753	18.2082	12.7314	19.234	18.8946	16.2562	18.0019	20.2523	17.2261	3.77795	turquoise
JreChr01G11649	10.6046	0.815596	8.15944	4.43197	3.76525	3.9431	2.48811	1.18305	1.07809	1.66631	1.30644	1.90059	0.023448	0.244199	0.331818	0.13329	0.093653	0.368731	0.805072	0.242072	0.303986	0.565524	0.165579	0.05602	6.52655	4.04677	1.58308	1.62445	0.199822	0.198558	0.450377	0.262374	4.14775	7.03569	0.69898	4.8173	2.7812	0.0783707	0.208328	0.048806	0.130204	5.71814	9.4381	14.8428	6.23416	4.99344	9.85435	1.10893	turquoise
JreChr01G11653	13.5172	9.28283	8.00344	3.51759	2.79531	2.92536	4.52927	4.27098	3.92963	2.91024	2.40572	3.10538	2.81429	2.86535	2.29627	3.57689	2.71654	5.58228	6.74681	6.3014	5.8495	9.41822	10.4448	14.0798	10.2678	3.07942	4.24329	2.80711	2.65864	3.95857	6.29924	11.3143	9.9535	7.77441	3.0089	5.87867	18.4253	11.3616	9.00304	12.3717	14.0041	16.694	20.1622	21.2791	18.6702	12.2791	11.4995	3.64622	brown
JreChr01G11662	2.01937	1.6099	1.09218	0.635628	0.773997	0.73824	0.533431	0.251708	0.252285	0.80065	0.724512	1.10576	0.348097	0.449321	0.655599	2.95201	1.01064	3.58334	2.32178	1.3815	2.44478	4.25138	4.17673	5.4655	1.57382	0.715955	0.345808	0.876973	0.484339	2.51533	2.04936	4.63121	2.40663	1.3945	0.55377	0.846782	1.73642	1.65412	1.42866	3.26322	4.29202	0.940677	0.497783	0.894238	0.921398	1.81762	1.43429	0.869844	blue
JreChr01G11671	44.0248	2.87312	30.7983	8.44571	9.73654	14.0103	7.64538	7.06025	7.96375	3.7061	3.04177	3.83183	5.00638	4.5212	4.36246	6.93994	5.55607	7.42461	6.17605	7.16951	6.19252	6.57373	7.73659	8.35693	25.8988	10.7309	7.55646	3.52657	4.63001	6.64021	6.51269	7.55575	5.53051	5.58097	4.4064	1.30418	33.5141	21.9256	20.0679	17.9261	10.7339	19.526	19.2387	16.1974	13.8328	14.0557	38.2837	3.1655	turquoise
JreChr01G11673	640.198	648.2	600.758	357.901	427.285	429.984	267.844	253.692	231.625	246.89	273.018	224.172	259.18	285.623	268.832	254.621	236.781	269.325	344.555	300.266	358.846	557.308	515.179	546.585	629.719	405.057	251.054	248.027	271.212	253.576	334.556	539.691	511.183	253.978	236.902	227.515	342.048	467.986	416.646	318.07	248.461	289.021	207.2	386.224	401.282	605.291	636.213	213.037	turquoise
JreChr01G11680	11.9552	9.96494	9.89583	3.96268	6.473	4.77619	2.15922	2.44656	3.55583	3.29054	2.2935	2.42693	2.93884	2.96008	1.55334	3.91439	2.73538	3.64636	5.65264	5.58654	8.30153	10.5198	7.49124	6.47664	10.6053	5.07062	2.72054	2.67032	2.48409	3.43205	6.51357	8.16256	9.12922	6.93893	3.99971	6.12955	20.5937	12.528	12.6432	12.8535	15.0263	11.1923	13.4887	14.4709	15.4807	13.2468	8.96223	3.27986	brown
JreChr01G11685	22.0724	14.7267	13.9802	1.08738	1.03303	0.761393	0.594314	1.00521	0.87824	3.73417	4.18839	2.32992	1.6225	2.65632	2.72708	6.07556	4.97584	4.9493	8.08875	16.1369	9.00742	7.26799	8.76143	8.37899	16.9265	0.9606	0.825923	3.41749	2.3353	5.33357	11.0777	8.13614	5.39321	5.28956	0.787268	1.79419	11.7043	9.4597	2.4776	3.60877	11.7501	0.242256	0.154368	3.67227	1.74265	0.130219	11.5597	5.61892	brown
JreChr01G11687	29.3434	19.6212	15.971	13.5896	12.8053	19.6176	7.01415	6.01358	4.69738	3.18491	3.26503	4.69908	7.58202	4.39988	5.70758	11.0936	11.4515	11.6865	20.8189	16.0195	22.1352	28.0103	22.4553	26.1582	21.6452	15.3375	5.90837	3.71634	5.89649	11.4105	19.6579	25.5413	24.34	22.0872	5.48005	14.4626	0.034692	0.40288	2.40843	5.96377	15.0361	0.00622	0.0151817	0.288487	0.420034	0.00511033	26.5521	3.69567	brown
JreChr01G11693	1.73251	1.59331	0.9049	0.373374	0.958302	0.002227	3.17712	4.65543	1.45426	21.1424	4.20337	11.0029	2.97242	4.44861	0.357888	118.996	29.7013	119.749	42.5317	25.034	48.1673	99.7204	79.6805	145	1.41024	0.444634	3.0956	12.1162	2.59297	89.4823	38.5777	108.134	147.337	62.6602	36.0804	3.2116	3.85466	4.67466	2.4068	11.1945	61.5935	0.327649	0.074096	26.8926	17.4247	0.00125233	0.875952	14.2557	blue
JreChr01G11698	0.001285	0.001249	0.001222	0.00138	0.016257	0	0.52223	0	0.001662	6.10179	4.42485	7.86242	3.90455	3.43919	2.27163	1.70661	2.29252	4.36598	4.2175	0.809185	5.39367	0.222964	0.001382	1.86738	0.001252	0.005879	0.174631	6.12969	3.20512	2.78837	3.47345	0.697243	1.8212	3.51487	6.04596	0.001701	34.8662	23.7818	53.7722	46.5714	90.544	14.6219	40.8139	26.9759	65.9653	86.1887	0.0165813	5.40807	green
JreChr01G11699	19.2269	13.5981	14.8502	3.58828	4.48784	5.34332	1.39677	1.79018	2.00888	1.24608	0.789595	0.269049	0.01449	0.302292	0.365805	0.289388	0.003976	0.08982	0.001154	0.001762	0	0.00334	0.00206	0	15.8917	4.47315	1.73194	0.768243	0.227529	0.127728	0.000972	0.0018	0.003969	1.00811	1.06239	0.673182	25.4983	10.9636	0.233995	2.47406	4.11177	8.05842	1.47379	2.24816	3.50866	0.00422733	11.7918	0.513355	turquoise
JreChr01G11702	51.5722	25.0094	29.0606	21.2529	25.0885	19.3346	10.4165	12.7249	16.0585	76.7626	63.5135	77.9194	103.011	121.845	150.069	99.721	84.8972	120.635	79.0608	88.8251	62.8463	87.6976	101.882	223.099	35.2141	21.892	13.0666	72.7318	124.975	101.751	76.9107	137.559	29.5104	42.5653	652.346	27.4109	42.6921	48.4908	56.1956	43.6435	72.0939	42.5694	49.4102	20.4626	28.8031	50.4424	36.0748	87.1492	blue
JreChr01G11710	6.48168	6.73085	6.61451	5.84904	5.10524	6.29291	0.848141	3.43058	1.17379	1.70434	2.69128	2.68109	1.45587	1.10203	0.96977	0.9908	1.17836	0.787743	1.39418	1.87522	1.54496	1.32978	2.75345	1.80692	6.60901	5.74906	1.8175	2.35891	1.17589	0.985633	1.60479	1.96338	3.98195	3.7971	0.697401	4.3911	11.2855	14.956	10.609	8.9062	2.49773	5.26854	6.8718	8.35033	8.45289	4.99248	6.83095	1.73782	turquoise
JreChr01G11713	97.0377	0.307676	1.15651	0.790641	2.06189	1.84745	0.966765	0.453082	0.348472	0.831763	1.02043	2.71179	2.07834	0.927206	1.99392	1.09431	0.422925	0.245386	0.779572	0.313975	0.999297	0.73964	0.375676	1.06235	32.834	1.56666	0.58944	1.52133	1.66649	0.587541	0.697615	0.725889	0.746901	1.39183	1.19452	0.33271	0.783584	1.02427	1.1802	1.14105	1.5275	1.74665	1.96285	2.75029	0.568264	1.16469	0.584114	0.937704	turquoise
JreChr01G11715	1.46147	1.45416	2.3507	3.02282	2.55115	4.123	2.79691	2.73636	3.31519	0.024086	0.130599	0.075047	0.59397	1.70959	1.64031	3.00393	1.38017	2.94533	3.31847	4.68265	7.21356	5.72641	3.6751	9.60753	1.75544	3.23232	2.94949	0.0765773	1.31462	2.44314	5.07156	6.33635	5.03728	5.28423	0.046103	2.14053	4.93079	4.86494	5.80669	3.93813	4.79155	7.29427	7.11756	6.22557	5.1098	5.68468	1.25571	0.681275	blue
JreChr01G11721	12.6144	7.33913	3.91472	3.68492	2.48784	4.08718	1.04729	1.31443	2.10706	1.53738	1.61853	2.38354	2.14016	1.90057	2.1543	1.16809	0.570052	0.769384	3.98616	1.714	3.85438	1.17254	1.74611	1.99723	7.95609	3.41998	1.48959	1.84648	2.06501	0.835842	3.18485	1.63862	2.04212	2.19096	1.0814	1.87847	2.93831	1.83976	0.376787	0.467386	0.588272	1.5676	0.772868	0.708143	0.396382	0.297662	7.64369	2.00925	turquoise
JreChr01G11723	44.0307	3.80823	34.5623	17.8685	21.3281	19.8345	16.0276	14.1699	13.1695	8.75765	8.82557	9.79805	10.6689	10.9833	8.33689	9.27005	9.11018	9.96575	17.1897	14.8153	15.3256	25.6148	23.6878	27.8553	27.4671	19.677	14.4557	9.12709	9.99639	9.44866	15.7769	25.7193	26.1826	28.8895	11.021	11.4891	48.7801	35.0035	32.0772	27.8015	26.3306	56.7351	45.1177	31.0178	45.8593	44.6132	28.7832	10.1596	brown
JreChr01G11726	2.45035	5.12793	12.5317	302.153	440.265	176.417	969.743	881.623	534.379	195.265	163.25	190.581	610.386	548.158	422.798	648.361	727.962	712.54	2736.44	1823.77	3080.63	2729.53	3301.95	3512.8	6.70334	306.278	795.248	183.032	527.114	696.287	2546.95	3181.43	1331.5	1067.35	481.052	514.045	0.032062	7.36192	41.821	261.662	1737.89	0.0235283	0	0.0673827	0.10839	0.580503	4.59843	320.358	blue
JreChr01G11727	23.5598	20.5032	21.1187	32.943	25.7855	31.6492	41.8727	6.00476	34.4753	24.7916	25.231	26.2822	34.5655	33.0642	29.3924	40.2383	35.2532	45.7651	43.3591	4.04342	48.7274	47.1141	51.8496	95.0579	21.7273	30.1259	27.4509	25.4349	32.3407	40.4189	32.0433	64.6739	32.1132	26.2424	43.0288	30.6289	43.4631	42.5036	52.8623	60.9558	45.2238	38.2969	48.8218	50.9855	54.358	53.5592	25.8165	29.9588	blue
JreChr01G11733	8.81965	7.19378	7.89881	8.71854	6.2116	6.06222	12.5996	6.94462	6.17094	9.86469	8.77367	6.2436	9.905	7.21903	7.22344	25.4887	14.3879	19.8633	27.4257	26.1151	8.86982	25.4132	30.4869	37.8004	7.97075	6.99745	8.57173	8.29399	8.11582	19.9133	20.8035	31.2335	35.578	21.659	5.65683	5.91674	42.5857	68.337	79.952	72.0755	57.9286	29.4821	30.1032	27.8389	35.67	37.3242	7.96334	5.92754	blue
JreChr01G11743	25.2613	31.7122	31.0159	50.466	38.2847	20.4409	37.7154	47.5071	32.4306	19.1858	20.1568	18.4921	11.1765	17.0397	11.1253	7.22282	6.5776	8.10688	1.64382	4.47909	2.59164	0.239087	0.850576	1.89354	29.3298	36.3972	39.2177	19.2783	13.1138	7.30243	2.90485	0.9944	7.35108	11.6394	7.58467	64.1511	14.0164	10.7799	5.57325	4.94303	5.92934	1.55909	1.29274	2.85489	1.61446	0.605728	24.1608	15.6055	yellow
JreChr01G11753	38.9511	36.9471	30.1825	0.151481	18.0578	22.9027	20.6466	12.9529	17.6764	8.11363	8.23833	9.88695	2.28226	11.9425	10.5127	9.90499	12.0873	10.6594	13.2972	10.5828	17.039	21.0724	18.6594	30.6119	35.3602	13.704	17.092	8.7463	8.24583	10.8839	13.6396	23.4479	16.5541	21.7031	10.7014	16.7825	23.2599	15.1744	23.478	18.1632	23.1108	33.1925	27.1744	22.741	9.43074	16.9291	37.7978	15.9181	turquoise
JreChr01G11761	3.08363	2.45025	2.07978	0	0	0.081221	0	0.052692	0.062071	0.103895	0	0	0	0.073937	0	0	0	0	0.030216	0	0.082394	0	0	0.05673	2.53789	0.0270737	0.0382543	0.0346317	0.0246457	0	0.0375367	0.01891	0	0	0	0.057648	0.955129	0.54504	1.12231	0.550339	0.0906213	0.342526	0.530596	0.47365	0.312148	0.378806	3.11983	0	turquoise
JreChr01G11780	0.852612	21.3994	19.6674	1.25617	0.562251	17.1677	0.13888	19.1695	1.05119	14.451	18.6543	16.0561	20.4658	1.16036	26.0487	4.11075	23.6627	21.9622	0.134937	0.276537	0.917917	70.3913	52.1774	50.6507	13.9732	6.3287	6.78654	16.3871	15.8916	16.5785	0.44313	57.7398	0.274483	41.7048	0.123351	17.4257	10.8059	21.8129	27.7395	22.2424	15.9368	0.537542	14.2375	11.3499	3.14863	1.36179	19.0783	16.4145	blue
JreChr01G11790	7.27838	3.655	3.81907	0.476577	1.39251	4.81827	0.039921	0.20128	0.045431	0	0	0	0	0	0	0.032809	0.06516	0	0	0	0.051818	0	0	0	4.91748	2.22912	0.095544	0	0	0.0326563	0.0172727	0	0	0	0	0	10.6635	0.156911	0.0401647	0.08812	0	1.84909	0.443891	1.36978	0.187532	0.0867047	3.04346	0.0142077	turquoise
JreChr01G11799	0.523308	0.56687	2.2327	3.97329	3.84255	2.73438	0	0	0	0.024064	0	0	1.36284	0.269818	0	0.03851	0	0.001356	0	0	0.006498	0	0	0	1.10763	3.51674	0	0.00802133	0.54422	0.0132887	0.002166	0	0	0	0	0.020151	0.042875	0.00596333	0.104725	0.000909667	0.00675567	0.0643613	0.109505	0.049085	0.0134993	0.055544	0.059215	0.00700567	turquoise
JreChr01G11818	8.65383	11.4357	11.4647	9.01887	4.63221	6.07836	6.42284	6.46261	6.69665	2.11916	1.99967	3.79729	3.03575	2.84828	4.26629	10.9251	6.86862	8.80297	14.5802	13.0061	13.244	21.7726	14.7051	14.5938	10.5181	6.57648	6.52737	2.63871	3.38344	8.86557	13.6101	17.0238	12.8537	8.68044	4.07076	5.01898	21.4368	22.1365	14.9229	31.917	37.5971	42.9576	41.5402	28.9014	30.9242	52.0383	11.2694	2.39884	blue
JreChr01G11819	2.04193	3.42573	2.97051	0.420964	0.75888	0.508485	0	0.053762	0.145774	0	0.193198	0.319006	0.171486	0.116537	0	0.127179	0	0	0	0.00472	0	0	0	0	2.81272	0.562776	0.066512	0.170735	0.0960077	0.042393	0.00157333	0	0.675276	0	0.027498	0.059861	2.08712	0.430225	0	0.184426	0.018401	0.283114	0.043656	0	0.0322117	0.0261263	1.72437	0.0337427	turquoise
JreChr01G11820	48.3238	46.4675	48.8367	19.1936	25.9546	19.9199	2.77404	3.98334	5.20525	0.625671	0.015018	1.11374	1.05965	1.48637	0.466632	1.0866	1.15744	1.00631	1.26344	1.36515	0.94357	0.736939	2.19727	0.310105	47.876	21.6893	3.98754	0.58481	1.00422	1.08345	1.19072	1.08144	5.58828	5.06406	2.46952	10.8751	6.13294	2.80264	0.343113	1.07901	1.04709	1.3119	1.18833	1.4399	1.26587	0.306229	21.4593	0.736157	turquoise
JreChr01G11828	20.5401	16.4209	14.9497	1.56378	4.36401	2.57876	1.55419	2.19241	1.98048	1.11202	6.36173	4.31702	9.17203	10.9299	4.31644	12.4841	9.05984	15.7476	11.139	8.59328	13.4049	6.84706	22.1963	23.4191	17.3036	2.83552	1.90903	3.93026	8.13946	12.4305	11.0457	17.4875	5.50178	8.2023	6.6573	2.31253	10.9414	14.9388	14.6442	10.9068	21.9053	29.7286	19.3578	23.3083	25.1353	24.0474	16.4626	5.42367	brown
JreChr01G11869	0.017377	0.517759	0.084034	1.65108	2.19071	1.1896	1.86709	3.14478	1.64521	1.03606	1.58155	1.25277	2.4143	3.25098	1.8346	8.80083	5.27168	11.1462	16.9896	10.6482	15.0915	25.1533	21.2605	26.9073	0.20639	1.67713	2.21903	1.29013	2.49996	8.40624	14.2431	24.4404	7.51368	4.4156	2.48825	2.15596	6.15539	7.25886	7.51784	12.6463	18.5453	8.85141	9.37644	8.74076	8.04684	8.29779	0.104719	1.66183	blue
JreChr01G11904	5.26013	4.30291	3.56576	12.9541	15.331	11.9176	5.12453	3.45676	5.79066	13.4874	11.265	14.6511	10.5449	9.17654	10.2466	7.42153	8.32587	7.84062	44.4343	19.0517	25.694	35.2895	55.733	48.0424	4.37627	13.4009	4.79065	13.1345	9.98935	7.86267	29.7267	46.355	30.1481	23.0315	43.9181	13.8116	2.413	2.1453	3.79574	6.45729	65.6314	0.696596	0.465095	0.300545	0.171584	0.0457133	6.5242	8.50104	blue
JreChr01G11913	258.753	223.18	236.439	116.027	88.7082	108.247	102.205	109.82	92.5514	86.4151	72.9228	82.5148	87.8171	105.515	113.561	121.283	98.2217	119.865	122.146	118.512	116.772	141.408	149.133	228.351	239.457	104.328	101.525	80.6176	102.298	113.123	119.143	172.964	122.049	119.719	131.147	105.984	205.95	220.047	363.895	260.813	264.761	248.22	220.109	189.812	189.943	199.928	238.603	122.341	turquoise
JreChr01G11921	23.7208	18.2547	16.7599	8.40355	10.6608	11.0549	6.6393	2.84211	4.61723	3.74002	3.79298	4.1088	4.00599	3.84024	3.56085	3.81154	3.75231	2.7844	5.94904	3.47429	10.0011	4.52047	5.87089	7.12361	19.5785	10.0397	4.69955	3.8806	3.80236	3.44942	6.47482	5.83832	6.82144	5.2905	4.03401	7.47115	40.1989	36.668	22.8975	20.4973	9.86026	14.5356	18.5215	21.2021	12.0277	12.0382	19.565	4.00718	turquoise
JreChr01G11928	0.083533	12.3938	2.54408	11.0174	4.56373	1.28565	5.73396	0.654499	6.03507	2.2954	0.477302	0.765916	0.327531	0.107457	2.06688	4.4102	0.274032	0.551042	3.15977	5.34346	0.531038	7.66472	4.92339	2.40694	5.00715	5.62226	4.14118	1.17954	0.833954	1.74509	3.01142	4.99835	6.21661	0.464022	2.9551	0.730409	1.49461	7.3009	6.36908	8.19639	7.45173	6.47662	2.62316	3.5255	1.36132	5.13654	3.05762	3.71644
JreChr01G11929	11.8424	0.22333	0.181829	4.55591	0.127595	0.150089	0.30185	4.23104	0.287543	0.153235	0.159173	0.16057	0.205087	0.169862	0.154441	0.132457	5.92166	7.88291	9.56336	9.33082	14.0441	0.221247	0.173112	0.158622	4.08254	1.6112	1.60681	0.157659	0.176463	4.64568	10.9794	0.184327	0.334608	0.441474	5.90257	0.174627	4.89664	0.291263	7.77322	14.604	0.283725	0.190444	4.47394	12.8373	0.196464	3.02172	7.16535	4.12566
JreChr01G11930	19.6754	13.8051	19.5968	481.617	489.105	302.56	244.241	324.014	369.62	405.271	331.337	399.148	607.056	575.466	682.243	748.851	702.699	786.896	1945.01	1579.22	1665.35	2010.53	2356.4	4122.62	17.6924	424.427	312.625	378.585	621.588	746.149	1729.86	2829.85	1013.39	929.889	679.464	517.37	1.63784	13.2145	117.688	254.427	776.667	0.007813	0.368676	0.0635187	0.522429	0.696512	21.6233	765.924	blue
JreChr01G11947	9.35177	11.3377	13.1137	11.5004	11.508	10.5362	7.21726	6.81306	7.01999	3.70165	5.5521	5.57777	3.19895	3.42459	3.71588	5.23863	7.67903	4.82841	6.28636	9.31184	8.74001	15.1538	12.9497	11.9709	11.2677	11.1815	7.01677	4.94384	3.44647	5.91535	8.11274	13.3581	9.72721	14.296	5.59052	9.10575	19.8701	28.4741	42.9274	36.5193	38.6302	27.5964	28.734	25.8859	26.0179	27.1059	9.08376	5.71949	brown
JreChr01G11949	0	0	0	0.00871	0.017488	0.00469	17.0032	16.3013	0	0.007204	0.010952	0.017487	1.55272	1.51352	0.003748	0.008806	0.0014	0.006452	0.292464	0.004891	0.309925	0	0.007857	0	0	0.010296	11.1015	0.011881	1.02333	0.00555267	0.202427	0.002619	0.560344	1.10926	0.030794	0.035484	1.06778	0.901114	1.88253	0.711379	0.884097	0.0462333	0.0920917	0.0118737	0.045413	0.00727567	0	0.0100117
JreChr01G11951	118.845	126.783	101.568	36.548	35.9384	40.5728	44.9814	30.8368	32.9282	26.1851	27.87	20.0359	32.3613	32.7776	27.7457	68.6373	39.7262	79.8515	81.2346	63.4183	90.4242	128.251	116.068	173.449	115.732	37.6864	36.2488	24.697	30.9616	62.7383	78.359	139.256	101.405	75.3864	36.3381	28.6832	199.542	140.176	142.115	112.976	95.1466	211.021	266.281	272.456	347.356	232.917	117.499	25.8183	brown
JreChr01G11953	45.2146	42.4277	7.10777	5.11909	25.4045	13.8091	13.2755	10.4381	13.2964	9.01261	10.6462	14.8993	6.78501	8.40493	8.29903	9.16709	9.37961	17.2835	13.4153	25.0702	15.4674	31.7483	15.5868	27.5455	31.5834	14.7775	12.3367	11.5194	7.82966	11.9434	17.9843	24.9602	15.7455	29.7339	5.25209	16.3757	23.8961	28.2116	17.951	14.059	12.8102	14.7657	15.0725	13.7525	12.4401	9.55427	21.2173	14.3084	brown
JreChr01G11955	43.8038	40.5777	36.381	26.5255	30.616	24.8387	18.2009	14.6113	20.9848	16.3426	19.8592	16.5177	20.5213	15.4276	15.4819	22.1747	20.8819	19.8067	22.214	21.6999	26.5212	34.1712	32.6478	44.8742	40.2542	27.3267	17.9323	17.5732	17.1436	20.9544	23.4784	37.2311	21.8429	28.8851	18.7514	21.967	38.7393	32.9216	33.5055	32.2364	37.4358	29.1377	24.198	27.4563	26.7193	24.6643	38.1941	18.9577	brown
JreChr01G11958	34.9469	30.002	31.8414	10.8682	18.4053	10.3029	14.8593	10.8369	11.3589	9.34786	9.52982	8.24538	10.3011	12.4067	8.21087	7.19514	11.5413	8.20193	18.1038	12.9675	19.2133	26.973	21.2635	16.0626	32.2635	13.1921	12.3517	9.04102	10.3062	8.97946	16.7616	21.433	19.6318	16.9689	9.01628	8.95166	34.4333	37.0752	17.5566	13.9037	18.2749	51.3605	82.831	55.083	36.7834	28.2665	23.5537	5.31682	turquoise
JreChr01G11961	361.085	196.808	300.603	1337.49	1102.09	1203.07	1220.21	1076.17	1235.42	883.174	795.551	996.807	1110.23	942.387	989.558	1209.63	1353.6	1179.85	1391.69	1204.15	1196.16	1373.09	1278.93	1803.37	286.165	1214.22	1177.27	891.844	1014.06	1247.69	1264	1485.13	1196.6	1141.09	1014.15	1491.55	6.14498	82.4249	197.33	481.484	908.095	1.30215	4.21051	8.43621	15.165	9.87067	388.743	1218.11	green
JreChr01G11966	10.1783	16.1183	11.3887	0.049429	0.006768	2.48072	0.064638	0.250783	0	0	0	0	0	0	0	0	0	0	0	0	0	0	0	0	12.5618	0.84564	0.10514	0	0	0	0	0	0	0	0	0.027967	1.79565	0.453409	0.012963	0.0634207	0	0.483866	0.099831	0.141864	0.129182	0.0505177	14.3497	0	turquoise
JreChr01G11981	0.000369	0.460999	0.088952	0.001876	0.004195	0	0.001867	0.008704	0.002375	0.090906	0.00897	0.181441	0.756798	0.20478	0.901686	9.10331	1.63192	10.9857	5.83123	1.56532	6.81494	4.83781	5.03599	6.92366	0.18344	0.00202367	0.00431533	0.0937723	0.621088	7.2403	4.73716	5.59915	5.19284	3.99626	0.179733	0.001566	3.87061	0.00320567	0.0281557	0.501116	1.03335	0.0989303	0.00982833	0.273995	0.009519	0.425966	0.000780667	0.0439213	blue
JreChr01G11988	7.00013	5.66881	6.80682	1.20168	1.39233	0.872015	1.10467	1.56115	1.93565	0.914243	0.8051	0.761199	1.17504	1.51868	1.28175	1.05775	0.964312	2.00791	0.494172	0.687934	1.14306	0.02042	0.005997	0.013903	6.49192	1.15534	1.53382	0.826847	1.32516	1.34332	0.775057	0.01344	0.001994	0.033248	0.597734	1.04367	3.51777	2.94015	0.270149	2.0698	0.554866	3.52175	2.27384	3.03999	1.9777	0.549809	4.60565	0.532753	turquoise
JreChr01G11989	4.30878	9.85736	11.6297	0.164234	0.293173	0.477187	0.647292	0.202341	0.261409	0.273773	0.17053	0.035481	0.154148	0.421969	0.008685	0.249301	0.198429	0.350111	0.019725	0.98326	1.08592	0.717771	1.07393	0.921847	8.59862	0.311531	0.370347	0.159928	0.194934	0.265947	0.696302	0.904515	1.26627	0.944272	0.171021	0.098107	4.01064	3.41731	1.97643	2.30476	1.29243	4.39543	6.08197	7.25163	4.92154	4.70628	2.47325	0.0409	turquoise
JreChr01G11990	2.51515	2.34645	1.98534	0.002975	0.543072	0.246209	0.519026	0.741403	0.676061	0.027134	0.015267	0.002494	0.719819	0.468622	0.07532	1.38521	1.92231	2.67551	3.85496	1.22378	3.52006	4.08805	5.24434	4.47526	2.28231	0.264085	0.645497	0.014965	0.421254	1.99434	2.86627	4.60255	0.463952	0.964858	0.001514	0.002217	2.1908	4.19458	1.15203	2.97173	3.42423	37.9611	29.9289	37.5504	22.5184	10.784	0.962689	0.251385	blue
JreChr01G11994	9.10378	8.20452	7.75768	0.320026	1.60632	2.33281	0.506395	0.7244	0.028249	0.699274	0.574935	0.637515	0.071369	1.95307	0.149119	1.25712	1.36612	1.7405	7.49323	2.71663	8.36	7.44283	8.34999	3.08116	8.35533	1.41972	0.419681	0.637241	0.724518	1.45458	6.18995	6.29133	2.5297	1.27302	0.608557	0.993219	3.9226	0.388244	0.0133333	0.132981	2.79993	1.28479	0.641969	0.853371	0.318738	0.203991	9.38479	0.28922	brown
JreChr01G11999	10.7129	10.675	11.5964	2.72917	4.49931	4.4506	1.67287	2.07851	1.67149	1.33986	1.55028	1.42272	0.038542	0.96261	0.893675	0.520724	1.11163	0.846633	0.008707	0.377741	0.222847	0.394084	0.278967	0.588882	10.9948	3.89303	1.80762	1.43762	0.631609	0.826329	0.203098	0.420644	1.16772	1.1141	1.81958	2.72855	12.6122	5.67864	4.50425	3.20221	2.0566	5.24786	5.44329	3.86015	3.44526	2.34104	9.95917	0.412789	turquoise
JreChr01G12000	13.6566	7.97938	6.57787	0.255522	0.449062	4.00982	0.205283	0.331272	0.003029	0.080354	0.04805	0.006014	0.000915	0.067008	0.07113	0.019319	0.010345	0.000608	0.011932	0.00068	0.00935	0.035929	0.001346	0.118419	9.40462	1.57147	0.179861	0.044806	0.046351	0.0100907	0.00732067	0.051898	0.011002	0.007	0.093377	0.016142	5.58203	0.259606	0.0127277	0.018213	0.0349193	0.566702	0.677602	0.467192	0.304074	0.00370467	12.4692	0.0127973	turquoise
JreChr01G12001	1.32067	1.59646	1.79335	1.47308	2.77953	0.871623	3.11916	2.7981	4.36661	2.56919	2.26628	2.12201	2.14683	3.41472	1.45582	6.94236	4.32716	8.32288	7.0935	4.61889	6.88626	9.83811	10.6741	9.53614	1.57016	1.70808	3.42795	2.31916	2.33913	6.5308	6.19955	10.0161	7.62847	5.16313	1.96108	5.26423	8.01965	22.5778	24.9141	10.9035	10.1274	10.8589	10.8381	16.5002	7.07898	11.6304	1.31388	1.99545	blue
JreChr01G12006	9.23316	5.1006	2.61896	6.40763	4.95116	5.17236	3.41812	3.36959	3.72144	2.42553	1.5891	1.81637	1.30152	0.748866	2.32458	0.976824	0.70663	0.828165	0.422154	0.535461	0.511999	0.223381	0.332737	0.007002	5.6509	5.51039	3.50305	1.94367	1.45832	0.837206	0.489871	0.187707	1.93672	1.04285	2.85691	6.50044	2.65597	0.895082	0.433056	0.21759	0.785658	0.228157	0.238321	0.398281	0.368816	0.0140807	6.41695	2.05562	turquoise
JreChr01G12010	27.636	24.6221	26.309	13.9909	17.4879	15.9073	21.457	13.4989	12.4827	14.7518	12.3851	12.3339	10.4098	16.4011	12.0873	16.399	15.9675	13.4376	12.928	9.79386	15.8723	10.7929	9.56202	11.6204	26.189	15.7954	15.8129	13.1569	12.966	15.268	12.8647	10.6584	8.69146	13.7932	14.8848	19.0846	18.6789	25.0632	22.4638	19.6244	17.5477	14.6094	17.2963	21.2092	21.085	20.5491	26.4364	12.1412	turquoise
JreChr01G12015	15.1829	11.624	15.9978	3.55456	5.24722	5.8207	5.31886	2.28787	2.0217	2.30185	1.96764	2.87716	2.03107	2.83992	3.6086	3.98475	4.54897	3.82298	6.31177	4.20516	4.07189	6.23144	6.75924	7.93046	14.2682	4.87416	3.20948	2.38222	2.82653	4.1189	4.86294	6.97371	7.0732	8.84307	2.56796	5.43044	26.3438	19.8522	17.9467	19.1798	17.0603	19.64	18.3304	20.0621	17.5473	17.3071	10.112	2.61418	turquoise
JreChr01G12016	2.39392	42.1001	3.15759	0.50461	7.5924	9.08316	5.0839	3.96327	4.21424	1.25688	6.1342	5.895	0.116966	4.59088	4.57827	8.3869	0.17349	8.59951	8.8454	0.60756	8.8846	0.633798	0.13035	0.15163	15.8839	5.72672	4.42047	4.42869	3.09537	5.71997	6.11252	0.305259	29.1743	0.246862	0.334459	6.21661	4.28829	13.3837	20.0981	7.51465	0.553865	1.49101	0.356867	2.71877	1.17851	2.77803	0.968883	2.78187	turquoise
JreChr01G12022	9.37136	4.6605	7.80552	0.754543	0.68497	1.42503	0.376461	0.395981	0.738409	0.004082	0.006256	0.017989	0.016144	0.002786	0.015858	0.22615	0.098456	0.003995	0.010347	0.002121	0.002931	0.001494	0.00752	0.014872	7.27913	0.954847	0.503617	0.00944233	0.011596	0.109534	0.005133	0.007962	0.006006	0.024431	0.00123	0.273141	7.73936	4.93068	2.80636	2.60924	4.43824	6.45323	7.55638	4.17299	2.81654	2.19665	5.5064	0.004566	turquoise
JreChr01G12026	37.9786	42.9761	31.921	14.6046	18.6615	18.9583	17.1626	13.6362	14.0877	11.0267	11.8395	9.9252	12.6831	11.9185	13.0255	9.86224	10.015	13.2714	21.2662	12.6102	28.3493	20.4807	24.1019	21.8349	37.6252	17.4081	14.9622	10.9305	12.5424	11.0496	20.7419	22.1392	20.7664	22.0566	14.7743	15.1866	35.2207	45.9681	44.6394	41.1622	26.6889	35.6529	26.6143	30.5017	28.5297	28.9392	41.0896	14.4931	turquoise
JreChr01G12027	281.007	552.29	655.53	2388.14	2049.25	1561.75	4326.06	4145.84	3357.28	4874.6	5798.67	4037.19	3195.65	3442.53	4168.48	2032.49	1706.75	1868.94	228.761	1231.71	263.452	0.011379	0.755637	70.4513	496.275	1999.71	3943.06	4903.49	3602.22	1869.39	574.642	23.7394	710.983	1394.32	2155.69	3112.33	0.007727	84.3192	152.309	159.618	0.013874	0.003673	0.00526733	0.010035	0.019422	0.0627927	430.777	4442.62	red
JreChr01G12029	0	0.905205	0.096792	0.012248	0.014652	0.021091	0.150686	0.074132	0.020169	0.01486	0.018758	0.034923	0.011012	0.053321	0.147318	0	0.033358	0.000522	0.621768	0.057237	0.919154	8.23469	6.49771	7.36949	0.333999	0.015997	0.0816623	0.022847	0.0705503	0.0112933	0.53272	7.3673	0.101341	0.103315	0.197621	0.04542	8.73868	11.4925	23.2264	10.4785	11.866	4.3409	2.58599	1.70637	2.30777	1.15291	0.0414613	0.0648057	blue
JreChr01G12035	454.375	406.697	373.973	281.647	318.829	217.203	159.13	174.923	235.06	127.52	130.97	129.893	128.738	162.071	144.208	156.661	122.698	152.323	82.3705	101.628	81.2078	79.957	96.3248	84.9324	411.682	272.56	189.704	129.461	145.006	143.894	88.4021	87.0714	116.871	223.248	137.913	210.448	268.011	219.018	144.163	127.536	99.5901	156.257	127.219	155.003	147.327	177.503	277.531	126.824	turquoise
JreChr01G12037	8.38954	7.45404	7.24264	3.40554	3.68268	2.25047	2.55445	2.04835	3.19539	2.39462	1.78945	2.31374	1.57021	0.821349	2.28562	2.69374	2.80752	1.61068	3.68523	3.56386	6.05366	8.79298	6.56185	6.05446	7.69541	3.1129	2.5994	2.16594	1.55906	2.37065	4.43425	7.13643	7.36156	4.61377	2.14072	4.21486	8.34351	8.48905	10.735	10.8184	9.72232	4.25121	5.44817	4.86158	5.79472	7.17989	8.23553	2.64012	brown
JreChr01G12039	21.6371	16.9803	18.6466	17.4749	20.1217	16.625	18.0182	15.0624	10.1331	6.19836	6.03306	6.54438	8.25184	8.02582	9.28559	18.2119	15.9054	17.6915	18.8877	14.4175	16.9661	17.0395	16.6754	25.2505	19.088	18.0739	14.4046	6.2586	8.52108	17.2696	16.7571	19.6552	9.75372	9.65195	17.0041	17.0196	37.723	34.4654	31.218	24.8908	12.5357	75.9746	29.9858	54.4264	40.4822	27.9694	15.833	6.51446	brown
JreChr01G12042	14.6289	12.6244	12.4172	11.306	3.71418	13.837	1.09824	5.10591	3.54669	3.89422	4.13369	3.97391	3.62864	3.68874	7.33236	13.7674	6.33881	13.8224	5.9913	2.77536	5.79243	2.62235	2.7087	2.43228	13.2235	9.61906	3.25028	4.00061	4.88324	11.3095	4.85303	2.58778	10.921	10.2253	4.22386	19.3971	15.1083	32.1717	59.7541	44.7053	111.98	29.6796	28.1759	121.098	78.5314	48.7277	11.8006	0.890969	turquoise
JreChr01G12043	6.19529	5.54506	4.08874	5.9445	3.11173	2.85114	6.11342	5.9145	6.90085	10.0837	10.6547	11.497	8.86841	7.95586	7.83435	15.8124	10.8525	15.3306	14.2073	17.1603	17.1591	16.8772	20.6802	31.4761	5.27636	3.96912	6.30959	10.7451	8.21954	13.9985	16.1756	23.0111	11.9954	10.1169	9.04765	9.12858	134.42	75.6936	55.5147	38.8701	40.839	40.5122	22.0257	13.6669	14.4914	14.3584	4.24335	8.04139	blue
JreChr01G12073	8.10492	9.18964	12.3993	38.0159	35.0951	28.7345	36.6501	30.1062	26.0524	37.7083	39.0009	41.7358	41.8512	26.7392	28.1782	30.3991	27.5638	32.6507	35.5994	39.2783	33.2181	55.377	47.6953	66.8049	9.89795	33.9485	30.9362	39.4816	32.2562	30.2045	36.0319	56.6257	66.0433	56.5937	35.6559	51.8954	56.4562	245.681	433.22	219.777	184.374	40.0868	87.4754	56.3506	82.5604	55.5243	12.5929	35.4623	green
JreChr01G12074	0.305387	0.524193	0.296526	3.6734	4.57139	0.616137	0.224875	5.52494	8.56773	3.84762	5.51544	5.59642	5.77011	7.34234	10.8312	8.74668	0.113476	8.86645	7.3797	0.393477	8.20276	4.4854	3.54745	4.41908	0.375369	2.95364	4.77251	4.9865	7.98121	5.90887	5.32531	4.15064	7.14251	5.77658	5.76368	6.27369	0.025627	0.04714	1.36287	1.49183	4.00274	0.143701	0.0203627	0.0103663	0.00750867	0.011996	0.380569	4.19912	green
JreChr01G12076	0.101852	0.015278	0	0.062512	0.054286	0.050917	4.89382	3.44714	2.80723	3.87655	4.48672	4.22536	2.21658	1.48066	3.81362	2.36143	1.82446	2.34882	0.089402	0.952861	0.449413	0.101362	0.40059	0.033899	0.0390433	0.055905	3.71607	4.19621	2.50362	2.17823	0.497225	0.178617	1.05522	1.11572	2.00906	1.24138	0.0236567	0.0801853	0.184192	0.16791	0	0	0	0	0	0	0.008329	4.18013	red
JreChr01G12077	45.4494	39.6144	45.1681	52.1258	33.5186	49.4748	58.3505	71.9943	58.0229	22.8776	19.9778	25.5921	20.6467	15.6793	22.1099	24.6849	19.7902	29.5143	5.21832	6.1511	4.69921	3.52896	4.91839	5.16425	43.4106	45.0397	62.7892	22.8158	19.4786	24.6631	5.35621	4.5372	13.3857	25.2029	20.9824	55.9746	0.261316	1.80134	2.09382	2.15227	0.519151	0	0.0400247	0.0273913	0.538026	0.148927	49.6964	24.9092	yellow
JreChr01G12095	3.55491	3.7128	3.69828	1.10232	0.704426	1.53245	1.22643	0.884451	1.48267	0.967397	1.18378	1.24793	1.32234	1.10407	1.41894	0.793987	0.983989	1.30515	0.305783	0.10829	0.216109	0.184716	0.11192	0.965684	3.65533	1.11307	1.19785	1.13304	1.28178	1.02771	0.210061	0.420773	1.71726	0.704446	1.18002	1.39917	2.06374	2.70841	0.561825	2.13311	2.72805	8.89847	1.59266	8.7882	26.9898	27.8381	13.8343	0.531178	turquoise
JreChr01G12097	0.158706	19.0575	104.349	0.069297	0.098138	0.070322	4.36869	1.93582	621.784	5.85579	6.71871	26.8739	62.5479	158.907	185.743	2.8022	52.5019	4.7527	67.363	209.543	92.2597	5.98142	0.142022	8.22124	41.1883	0.0792523	209.363	13.1495	135.733	20.0189	123.055	4.78156	121.861	6.03619	38.4811	6.08256	0.000530667	5.45647	4.62089	12.4971	5.55248	0	0.00140533	0.013627	0.433884	0.588252	6.51493	4.20106
JreChr01G12103	8.22205	11.2329	17.2634	1.54725	9.48427	3.23027	0.64838	1.52163	3.33344	3.50239	5.24932	4.24319	3.26775	6.17682	0.828804	7.27601	3.95773	8.10994	11.6177	4.00471	15.4775	2.56442	7.8456	5.55672	12.2394	4.75393	1.83448	4.33163	3.42446	6.44789	10.3666	5.32225	5.01617	5.01215	0.467288	6.32075	0.373793	0.946986	1.83267	2.688	6.48378	0.018278	0.0633083	0.0362513	0	0.018566	8.467	3.15866	turquoise
JreChr01G12113	6.3824	6.34287	4.75744	6.36985	8.06689	4.18942	5.02046	4.96343	5.3593	5.5009	6.18876	6.33596	4.64956	6.0336	3.15461	11.6001	8.91204	14.2337	30.0254	18.84	32.0006	36.999	29.5838	43.5329	5.82757	6.20872	5.1144	6.00854	4.61259	11.5819	26.9553	36.7053	18.0749	11.9186	1.53921	10.0869	4.51536	5.106	5.53486	13.8653	27.99	5.58768	8.53121	9.16817	9.7577	8.31779	4.7117	4.33107	blue
JreChr01G12115	13.7735	6.98987	7.95596	0.100504	0.460403	1.97089	0.144728	0.343697	0	0.032831	0.036634	0.036173	0	0.171047	0	0.073662	0.065532	0.10134	0.176326	0.09479	0.033122	0.041059	0.10514	0	9.57311	0.843931	0.162808	0.0352127	0.0570157	0.080178	0.101413	0.048733	0.115403	0	0.053105	0.03364	4.80708	0.633657	0.214163	0.245612	0.273124	0.607804	0.346711	0.702293	0.225318	0.323229	15.1174	0	turquoise
JreChr01G12116	26.189	25.106	31.8076	40.4212	28.8185	25.5757	30.1956	26.2902	16.6263	65.9641	32.7999	63.6545	52.1079	36.2578	48.5786	41.1043	50.0096	55.7626	126.845	106.945	145.338	260.189	156.123	81.7001	27.7009	31.6052	24.3707	54.1395	45.6481	48.9588	126.376	166.004	134.573	129.942	73.8825	43.1998	27.4822	31.3186	69.0063	39.3752	74.7929	22.237	34.1092	33.4042	36.5401	32.5992	26.5822	35.061	blue
JreChr01G12123	25.6527	20.6001	21.8475	9.27057	15.9113	18.6673	8.42349	11.523	11.7506	10.1097	6.87163	10.4333	5.71124	7.77202	6.36351	19.1029	11.8966	17.9554	12.9757	9.59013	12.2637	22.135	23.4163	22.0424	22.7001	14.6164	10.5657	9.13821	6.61559	16.3183	11.6098	22.5312	15.6696	15.3671	10.9762	12.2357	55.5532	28.4096	20.0283	15.181	18.9046	43.2925	41.273	46.2724	41.5568	33.7898	21.3473	12.3909	brown
JreChr01G12126	42.9122	48.2688	39.2789	47.8531	50.3165	43.4713	37.3055	38.9933	34.8613	25.9212	23.047	8.77068	25.4398	21.8027	23.5356	21.3154	20.9007	21.9843	33.6697	26.7853	31.4101	45.1713	43.2183	45.5162	43.4866	47.2136	37.0534	19.2463	23.5927	21.4001	30.6217	44.6353	14.1972	22.31	27.137	36.7807	24.6942	37.2697	43.7117	36.241	59.4861	51.6606	62.0355	51.9958	90.2761	68.4131	42.6076	43.4294	turquoise
JreChr01G12128	0.019389	0.197955	0.018298	0.022135	0.092362	0.026533	0.354709	0.030641	0.596246	0.048321	0.577404	0.088176	0.074902	0.068211	0.035533	0.992009	0.637993	0.857674	0.855925	1.59574	1.99859	4.38936	1.39874	2.80344	0.0785473	0.04701	0.327199	0.237967	0.0595487	0.829225	1.48342	2.86385	0.013744	1.04774	0.042132	0.063079	0.0397487	0.0289643	0.420441	0.483187	1.61133	3.08586	1.75471	1.71399	1.21736	2.49641	0.104409	0.734767	blue
JreChr01G12140	23.4564	17.4262	14.5379	15.6135	22.2946	21.121	16.4396	15.4285	10.3534	3.7786	0.544176	2.78489	6.25204	1.07383	0.078579	11.5574	10.5799	13.7726	12.5233	9.93594	10.4327	13.8161	14.4953	8.34145	18.4735	19.6764	14.0738	2.36922	2.46815	11.97	10.964	12.2176	15.3929	8.79148	9.75725	24.0415	29.3974	21.1763	0.687549	19.2194	12.2953	25.2512	14.4698	31.0454	26.1273	13.1492	20.1584	0.0715343	turquoise
JreChr01G12144	10.692	11.4717	11.0834	2.27464	2.07655	2.86612	3.0806	2.23332	2.06007	3.58501	3.64767	3.05991	2.89602	2.65328	2.67499	5.72488	3.37551	5.32594	7.92096	4.4702	7.45634	6.73136	7.41526	6.22907	11.0823	2.40577	2.458	3.43086	2.74143	4.80878	6.61583	6.79189	4.51155	3.89417	2.64569	1.99821	11.9052	6.54864	7.17823	5.93412	6.27432	8.20707	6.69574	8.93174	6.14751	6.93319	9.71648	2.36624	brown
JreChr01G12149	3.90098	11.7956	12.5979	1.54186	3.1895	3.11173	5.60314	7.47827	8.63301	1.22757	1.2207	2.74291	3.42118	3.48132	1.83825	3.22012	2.03363	2.53013	3.74374	5.40812	4.21259	2.22571	3.66674	3.74696	9.43149	2.61436	7.23814	1.73039	2.91358	2.59463	4.45481	3.21314	2.1319	3.97144	5.22163	1.53515	2.29331	3.0646	2.2921	1.87402	1.87531	1.07003	0.793377	1.50635	0.790859	1.27845	4.72589	0.973155	turquoise
JreChr01G12155	5.78777	5.27149	7.03592	3.13642	3.80074	3.142	2.51277	1.39625	2.06251	0.002433	0.004081	0.255902	0.01713	0.636808	0.641648	1.37117	0.654496	0.596452	1.37538	1.60695	2.25635	2.40186	2.58703	3.95316	6.03172	3.35972	1.99051	0.087472	0.431862	0.87404	1.74622	2.98068	1.43418	1.16188	2.0043	2.52805	6.25682	2.20903	1.4824	1.81477	1.01748	5.21259	6.89617	10.0672	5.88997	1.34585	6.07792	0.47634	turquoise
JreChr01G12157	20.6917	9.23903	13.3895	11.7786	12.3707	14.8214	7.17444	3.45858	5.23965	6.54469	4.96216	5.1718	4.76234	5.18497	4.36536	5.87705	4.6607	5.48169	7.91548	9.04526	12.1787	10.3951	15.0398	16.4879	14.4401	12.9902	5.29089	5.55955	4.77089	5.33981	9.71316	13.9743	8.22326	11.3769	10.043	8.62911	32.2705	29.189	37.4718	36.4641	24.3152	32.2939	37.716	35.7748	34.8244	31.8738	13.6442	3.44536	brown
JreChr01G12159	16.6093	16.7236	18.9011	11.465	11.2991	12.0273	11.724	8.679	11.5267	7.60321	10.3179	8.03343	10.1134	9.83339	10.6141	33.3115	18.1225	37.348	36.0388	22.5536	34.3739	60.4782	45.6417	41.2527	17.4113	11.5971	10.6432	8.65152	10.187	29.594	30.9887	49.1242	64.9224	41.7654	5.71768	9.83238	12.0313	13.5789	23.8738	15.5878	19.1394	6.98714	2.39969	3.19533	1.24258	1.85052	16.3496	5.74271	blue
JreChr01G12160	70.3024	49.4455	71.3413	75.6022	61.0811	59.65	56.1901	80.9632	58.9387	39.5502	38.5314	36.2716	35.6008	44.8152	62.6884	77.3822	76.5039	85.8247	194.455	138.335	149.708	149.665	136.75	175.23	63.6964	65.4444	65.364	38.1177	47.7015	79.9036	160.833	153.881	151.315	152.603	76.6956	75.0377	20.6622	27.5925	30.4073	54.2873	98.5931	26.9114	28.6061	26.1842	23.9805	24.1421	71.2495	79.1834	blue
JreChr01G12162	16.5322	15.1509	17.3166	13.6644	15.216	17.9671	10.2782	12.443	12.2276	5.35023	6.10465	6.20088	7.1961	6.36604	8.13294	12.2093	9.61038	9.3519	10.2252	8.57541	10.8486	9.61105	11.9785	15.7811	16.3332	15.6158	11.6496	5.88525	7.23169	10.3905	9.88309	12.4569	10.2901	10.1291	6.89198	12.8528	23.9807	22.5045	18.127	22.0103	16.6812	21.247	20.979	23.661	18.3317	18.2195	19.233	6.32287	turquoise
JreChr01G12165	105.107	88.0006	86.4005	12.7526	14.2122	14.0632	22.6238	18.5807	21.076	20.5065	16.7694	16.5919	16.4615	13.8949	14.346	7.53723	8.45586	7.58072	74.067	41.6029	90.5499	119.335	125.575	137.341	93.1692	13.676	20.7602	17.956	14.9008	7.85794	68.7399	127.417	103.162	106.782	10.9241	13.8446	73.714	66.7915	36.4224	32.3386	52.1668	295.981	372.702	349.443	308.079	394.551	48.0227	12.5878	blue
JreChr01G12166	69.8242	53.0729	53.2355	85.659	84.0672	99.5099	36.0382	46.9389	54.2132	40.5405	40.5942	46.5863	54.8478	44.6674	46.071	56.6995	54.0879	44.0092	19.3953	26.6772	18.5776	8.80006	10.9189	13.3485	58.7109	89.7454	45.7301	42.5737	48.5288	51.5989	21.55	11.0225	11.9672	0.708878	48.7113	61.5111	12.6591	11.7408	5.48779	6.63723	3.4483	21.4223	19.5709	19.8944	11.4207	9.61352	71.4072	29.6849	yellow
JreChr01G12171	8.12256	4.59095	10.0682	39.3383	60.9062	23.7289	106.085	97.0989	102.379	93.4041	84.7411	75.634	138.888	217.573	93.2229	158.574	267.022	218.327	496.327	313.867	646.97	344.927	476.163	508.017	7.5939	41.3245	101.854	84.593	149.894	214.641	485.721	443.036	282.65	223.588	96.8489	133.342	2.87685	12.8715	25.1747	86.1681	228.656	0.176726	0.374365	1.61982	0.99419	0.199642	6.83657	87.7495	blue
JreChr01G12187	24.611	34.1182	41.116	37.5828	22.096	30.1178	15.2096	19.8626	29.1129	15.8859	22.8317	17.4116	19.2039	22.2689	21.4064	30.5885	34.2645	35.5845	77.6265	70.5671	82.253	97.7041	72.7846	88.3962	33.2818	29.9322	21.395	18.7097	20.9597	33.4792	76.8155	86.2949	29.1789	33.0226	22.8289	24.8822	8.36548	11.1597	7.08715	12.7764	64.0425	18.0337	6.82727	33.9157	13.3667	3.65687	28.6055	11.7843	blue
JreChr01G12197	75.8167	61.4572	66.2981	83.101	105.062	103.905	124.498	152.543	123.228	162.25	104.918	132.453	81.3506	80.4606	91.4082	276.327	112.258	334.202	117.888	104.983	119.298	160.055	169.032	220.82	67.8573	97.3561	133.423	133.207	84.4065	240.929	114.056	183.302	181.623	211.942	159.381	93.8576	165.569	448.181	627.812	175.96	295.088	269.905	225.582	412.73	792.157	327.558	91.8361	143.584	green
JreChr01G12199	25.9979	35.654	24.0208	17.6676	16.3916	14.4439	13.3779	7.44928	8.89734	6.25092	6.12038	5.41463	2.50918	4.55781	3.98832	5.08593	5.08701	6.15916	1.09023	2.68645	1.56046	1.50487	1.07605	3.08932	28.5576	16.1677	9.90818	5.92864	3.68511	5.44403	1.77905	1.89008	10.249	13.1885	6.41206	13.7957	0.524548	1.13621	2.16457	5.69212	2.30747	0.313053	0.074314	0.235506	0.335121	0.093019	17.5162	2.88976	turquoise
JreChr01G12204	11.885	11.96	11.2291	3.00066	4.07109	2.69074	2.64154	1.37176	2.73492	1.78707	1.3917	1.34664	0.678546	0.955901	1.9593	2.63262	2.08929	3.0195	2.29248	1.64899	1.98542	2.55701	2.63061	1.77374	11.6914	3.25416	2.24941	1.50847	1.19792	2.58047	1.97563	2.32046	2.35547	2.74047	1.21897	3.12581	32.0529	16.2541	4.08919	4.66795	1.37732	47.1529	43.6809	30.7778	21.8235	13.6825	5.07072	1.46287	turquoise
JreChr01G12213	113.078	94.3412	82.9434	21.0603	25.5123	30.7087	25.203	24.6322	26.8229	22.7767	21.2548	21.3915	24.3257	29.4843	26.593	27.6631	25.0749	32.3679	35.6191	27.3128	33.3215	43.5878	47.8042	55.0141	96.7875	25.7604	25.5527	21.8077	26.801	28.3686	32.0844	48.802	35.7703	36.5746	32.0596	23.6521	60.0592	42.867	37.7118	36.4952	38.6968	53.8199	41.3651	48.5509	46.2661	33.0837	100.51	23.6287	turquoise
JreChr01G12217	1.54609	1.60021	2.31266	81.1704	102.693	94.5865	73.0754	97.2463	98.7343	101.049	63.5227	115.99	90.7004	90.6801	89.4778	294.533	189.836	332.215	496.476	331.386	482.122	513.387	542.024	656.834	1.81966	92.8167	89.6853	93.5205	90.2861	272.195	436.661	570.748	245.09	272.44	284.79	111.225	3.54037	170.235	521.573	844.383	869.327	9.01144	11.4858	50.0816	108.406	31.9769	17.7387	197.514	blue
JreChr01G12226	2835.16	3740.58	4678.64	10345.8	10928.8	11314	5325.22	6549.26	5091.58	9415.62	6261.11	8984.73	9066.88	10033.9	8935.26	12343.3	13380	11878.6	12531.4	13172.6	12798.9	6310.11	8731.19	3699.72	3751.46	10862.9	5655.36	8220.49	9345.34	12534	12834.3	6247.01	9858.12	5810.74	6711.53	7016.89	2.17081	342.415	1095.46	2623.63	1580.31	0.08069	0.465473	6.08831	20.7236	21.6462	3499.76	8502.67	green
JreChr01G12227	81.5633	69.6732	58.9473	41.0483	36.0506	67.0835	31.8726	28.8707	49.0017	21.433	13.0247	11.9402	21.2931	21.7154	17.2196	42.4082	27.3441	43.9691	25.5095	22.5872	14.9519	18.024	21.8885	29.1367	70.0613	48.0608	36.5817	15.466	20.076	37.9071	21.0162	23.0164	27.553	23.0737	24.5142	25.3605	116.439	64.6737	65.0309	70.9291	63.9167	103.268	77.1101	81.7765	67.7471	64.8347	77.9444	14.9588	turquoise
JreChr01G12230	9.44542	9.0561	9.63251	4.50974	4.7016	5.30002	4.64595	3.62259	5.42779	1.78012	2.94177	2.08463	2.46127	3.10253	2.6279	6.41339	4.46915	6.15154	4.08787	2.82216	4.75017	4.1965	2.96189	4.41841	9.37801	4.83712	4.56545	2.26884	2.73057	5.67803	3.88673	3.85894	3.35409	3.82333	3.51445	4.81907	14.5189	9.93771	11.2888	8.6475	5.01444	12.5295	14.5102	14.9744	11.7325	10.6178	7.22876	1.86242	turquoise
JreChr01G12233	85.3562	167.479	109.313	287.04	198.076	180.403	180.772	242.793	253.006	271.065	236.9	247.518	338.076	344.241	334.027	430.236	341.469	361.288	130.67	165.552	97.981	116.496	124.753	176.627	120.716	221.84	225.524	251.828	338.782	377.664	131.401	139.292	195.316	192.833	269.62	385.122	288.905	424.128	108.234	82.6778	88.9825	12.5781	30.2247	49.7552	43.0766	51.7653	67.7074	167.547	red
JreChr01G12238	8.6307	8.62035	8.72463	8.31382	6.39147	6.16047	5.68927	6.01487	10.7928	4.21135	4.71662	5.5219	3.30862	4.40913	3.30296	5.68396	5.36523	5.71478	12.3803	8.43249	8.70326	9.60285	9.46047	14.6968	8.65856	6.95525	7.49898	4.81662	3.67357	5.58799	9.83867	11.2534	6.21127	5.428	5.5094	7.98204	9.09103	11.2861	12.3768	10.1511	9.18493	13.354	8.73067	7.91622	7.50231	12.8337	9.18008	6.64986	brown
JreChr01G12241	1.40753	1.75603	1.76996	1.04781	1.41522	1.32535	9.56711	6.94769	7.62641	3.6043	2.71118	3.57797	2.99306	4.03426	2.77755	8.06377	6.6497	8.92531	0.833598	1.01556	6.13093	5.01645	7.19816	0.309811	1.64451	1.26279	8.04707	3.29782	3.26829	7.87959	2.66003	4.17481	6.07242	1.02734	7.11148	6.61	22.3614	6.39637	4.8602	11.143	9.90005	14.282	21.9911	25.258	0.949852	5.57852	33.162	5.00601	green
JreChr01G12245	7.49564	4.29538	5.1764	0.831675	0.428576	0.810657	1.88792	0.363733	0.036406	0.863502	0.857834	0.827714	0.835664	2.92468	0.394281	0.543419	2.88022	1.54318	6.3475	4.50624	4.94594	15.3627	11.8138	6.52712	5.65581	0.690303	0.762687	0.849683	1.38487	1.65561	5.26656	11.2346	10.937	8.3112	2.73212	0.659641	97.8928	41.9149	20.1325	28.6994	41.661	541.51	204.426	113.462	116.136	183.101	9.62795	0.576281	blue
JreChr01G12246	2.40253	1.76072	0.943402	2.37915	1.84309	1.06094	0.075314	0.448119	0.921439	0.058732	0.055403	1.04715	0.011243	0.555744	1.00728	1.03225	6.52751	1.03412	28.5474	11.7017	28.4031	20.546	30.0118	14.1155	1.70222	1.76106	0.481624	0.387094	0.524756	2.86463	22.8841	21.5578	30.7405	35.6457	61.5605	1.55157	278.454	139.094	18.0926	10.8195	18.9485	73.0976	60.179	48.829	53.8878	73.4945	1.02783	0.762945	blue
JreChr01G12247	1.62768	2.15916	3.39151	0.014465	0.06305	0.259687	0.984927	0.69402	0.173166	0.092992	0.003527	0.014497	0.006951	0.717689	0.006705	1.95362	0.95919	2.54798	1.34875	1.85035	1.42987	5.71573	5.26284	1.42891	2.39279	0.112401	0.617371	0.0370053	0.243782	1.82026	1.54299	4.13583	0.009211	0.012178	0.012039	0.73059	3.09051	1.91763	1.87673	2.00413	4.97061	4.32719	6.96303	5.97208	3.52658	1.10164	2.39732	0.0410263	blue
JreChr01G12254	22.2847	11.8743	11.5138	9.42524	12.1955	12.8357	2.92501	3.70817	7.18198	8.67035	6.64921	11.2141	15.387	15.9843	23.6634	68.4849	37.94	76.6833	76.731	40.63	59.2476	61.0232	63.1501	145.824	15.2243	11.4855	4.60506	8.84454	18.3449	61.0361	58.8695	89.9991	85.3889	43.685	24.5343	9.87583	24.9593	8.92031	7.45019	17.9549	31.9622	14.7102	13.956	15.6868	12.6492	14.8867	18.9097	10.285	blue
JreChr01G12257	0.322637	0.149343	0.267393	1.83631	0.156096	0.13097	1.95973	0.143311	3.35663	0.111858	0.165009	0.394961	2.08372	0.12485	1.0453	1.57715	1.87827	1.59711	1.78703	2.05466	0.164881	1.0522	6.55235	4.83568	0.246458	0.707794	1.81989	0.223943	1.08462	1.68417	1.33552	4.14675	0.12672	0.512064	0.287426	2.18532	0.529114	0.366445	0.180947	0.391054	3.20053	0.099434	0.216788	0.160483	0.129912	0.117823	0.951715	4.34026	blue
JreChr01G12269	8.45116	6.51855	6.76474	5.11625	6.42387	5.91826	3.63125	2.84459	3.66489	3.45505	4.65496	2.66037	4.76935	6.81541	4.67986	13.5304	10.6478	11.8491	20.2234	10.1465	22.6652	20.854	18.9783	36.0132	7.24482	5.81946	3.38024	3.59012	5.42154	12.0091	17.6784	25.2818	7.08528	4.12681	8.43679	6.51306	13.567	5.45729	4.14265	6.05201	8.25299	13.9446	10.1807	10.4735	8.8926	7.7807	7.62745	4.01325	blue
JreChr01G12270	28.2695	37.3161	33.6844	32.4081	38.557	19.4048	44.7105	36.9024	36.9174	24.4089	33.1498	31.485	15.4982	18.1055	17.1707	13.5596	20.6005	17.5137	31.4761	21.1002	46.4339	74.9059	65.6838	38.4152	33.09	30.1233	39.5101	29.6812	16.9248	17.2246	33.0034	59.6683	52.1034	49.4853	30.6701	48.8471	25.7984	21.7832	38.9715	37.498	46.8983	24.0785	29.6521	36.8218	34.8009	35.391	19.974	37.749	blue
JreChr01G12288	0.027482	0	0.004868	0.4481	0.150396	0.113507	0.527066	0.025987	0.122451	1.30966	0.758959	1.0636	1.64254	5.72581	1.86656	2.08338	5.96064	2.96874	37.1053	22.4627	40.2628	24.6911	29.8759	20.366	0.0107833	0.237334	0.225168	1.04407	3.07831	3.67092	33.277	24.9777	31.5541	23.6882	105.453	0.304597	1.47687	1.11354	2.22881	1.99903	8.66116	7.6274	24.5189	4.01041	6.86491	6.2841	0	0.849261	blue
JreChr01G12291	8.29194	8.36079	8.1441	2.88664	4.46451	4.74378	0.956312	0.908974	1.85387	0.936854	1.41805	1.29093	3.75466	4.94198	1.83119	4.88052	5.11665	7.45176	7.51525	3.18357	5.59241	7.73483	6.6344	7.82031	8.26561	4.03164	1.23972	1.21528	3.50928	5.81631	5.43041	7.39651	2.52893	2.79623	2.66762	2.07679	5.07293	4.36613	2.98881	5.90366	3.06745	3.79515	6.31048	6.18079	4.23907	3.78122	9.6578	0.919296	brown
JreChr01G12293	40.8611	29.7797	18.9753	9.84173	12.2756	3.05344	7.02215	7.80017	6.74229	5.49369	6.59034	10.4933	1.82917	10.8867	10.1285	5.43355	3.66061	8.18957	11.7315	9.13196	10.2694	17.0347	11.7041	31.2402	29.872	8.39025	7.18821	7.52576	7.61481	5.76124	10.3776	19.993	7.40222	4.46561	9.82735	4.89674	26.4325	18.1681	14.1046	19.1585	24.5273	14.9467	20.215	27.5351	20.3255	22.4113	29.8449	6.0757	turquoise
JreChr01G12295	2501.62	2690.52	1298.45	505.357	687.842	831.612	284.612	185.16	133.81	23.9921	57.9098	74.4087	77.1211	45.6572	104.416	30.9424	26.6639	40.6406	33.8426	2.22714	55.4666	17.4316	10.2341	2.81103	2163.53	674.937	201.194	52.1035	75.7313	32.749	30.5121	10.1589	82.7121	60.807	40.6942	293.815	3.17498	77.0563	37.665	17.6219	7.63979	0.0283857	1.86585	12.6456	22.0488	13.2499	2204.9	50.1165	turquoise
JreChr01G12297	1.58157	1.49116	6.19069	17.9329	27.2105	13.2476	27.6026	10.6316	16.8774	15.6	22.689	19.5275	15.1464	15.0913	18.8655	11.7487	10.5017	15.2703	7.57707	5.10638	8.12436	9.14462	16.6051	10.8101	3.0878	19.4637	18.3705	19.2721	16.3677	12.5069	6.93594	12.1866	24.439	33.654	11.353	49.2036	18.6036	9.5587	57.1199	17.2659	2.46174	0.270326	0.0853207	0.223269	0.439705	0.034426	2.27747	29.6531	red
JreChr01G12306	0.277693	29.9434	23.6066	2.58774	3.5171	3.3442	0.130055	0.790559	1.94559	1.49811	1.28111	1.07235	0.963426	0.368056	0.47096	0.391962	0.890539	0.296487	3.11865	3.26889	3.3488	5.86068	5.92223	3.0779	17.9426	3.14968	0.9554	1.28386	0.600814	0.526329	3.24545	4.9536	17.4031	8.94427	1.10933	3.50079	37.3881	36.6533	27.4626	24.0608	20.4308	39.3818	49.3412	57.0619	55.4618	49.9778	20.787	0.769206	turquoise
JreChr01G12314	73.179	61.4615	39.1712	5.97975	8.5104	10.7655	6.03283	6.13778	7.31535	15.512	15.0299	20.9562	19.3894	24.1031	26.2089	9.53673	12.8205	13.0788	24.133	19.9197	21.0858	34.0995	30.2006	26.7136	57.9372	8.41856	6.49532	17.166	23.2338	11.812	21.7128	30.3379	13.3728	9.89949	27.5044	11.5633	26.866	19.9222	28.2447	14.274	36.2378	26.9234	14.0333	10.4531	9.54277	20.4368	41.1573	20.3889	turquoise
JreChr01G12315	60.8691	50.0826	55.4032	24.7207	22.2249	28.6484	22.7381	24.6064	27.484	17.3076	21.1975	19.3034	17.4234	20.0552	22.1321	14.2197	16.007	15.3336	13.7667	13.3183	15.9359	13.2651	14.1224	19.0926	55.4516	25.198	24.9428	19.2695	19.8702	15.1868	14.3403	15.4933	25.5531	27.6483	25.692	21.2687	39.763	34.8085	34.7467	30.9552	27.5319	52.0055	50.1439	43.7561	46.3948	41.5719	63.7841	20.8205	turquoise
JreChr01G12323	13.0812	12.9886	7.42059	0.002025	0.152676	2.02919	0.000784	5e-06	0.38828	0.003749	9.2e-05	0.000222	0.000396	0.000184	7.7e-05	0.000489	0.003722	5.9e-05	0.001758	0.003373	0.000445	0.000674	0.000361	0.000732	11.1635	0.727963	0.12969	0.00135433	0.000219	0.00142333	0.00185867	0.000589	0.010758	0.002176	0.007231	0.000509	4.85818	0.000485333	0.00310167	0.000123	0.002041	0.596591	2.29089	1.74165	0.000564667	0.000514667	11.9036	0.00128267	turquoise
JreChr01G12324	34.6259	28.1203	30.3054	43.0911	52.5073	32.4781	85.8985	77.0023	93.3161	85.1523	100.325	94.1771	109.792	97.6655	103.895	107.35	106.696	120.356	121.668	107.448	119.167	104.492	157.292	189.116	31.0172	42.6922	85.4056	93.2182	103.784	111.467	116.094	150.3	92.1869	131.209	110.525	91.6633	0.11832	3.64885	10.9951	18.544	42.6434	0.138414	0.0180967	0.0600713	0.165231	0.0826807	33.2005	82.7355	blue
JreChr01G12325	6.04207	4.68852	5.37891	1.78074	2.61212	2.31005	0.918943	2.27026	2.05323	3.16569	2.78606	3.53645	2.59675	2.83746	2.96023	5.17542	2.60238	5.27474	9.46041	4.94845	8.44031	12.4253	12.6863	12.5656	5.36983	2.2343	1.74748	3.16273	2.79815	4.35085	7.61639	12.5591	2.96611	8.66363	3.3307	4.27299	7.28299	6.58986	5.97429	5.12926	7.78265	8.13852	7.21421	8.42496	7.81045	7.33457	4.93687	3.78924	blue
JreChr01G12329	65.0978	76.7386	60.9891	16.1211	18.5095	22.9481	13.6726	10.3489	12.4489	13.1915	11.7966	12.7799	9.90548	13.3709	14.2942	12.8553	11.9128	14.9059	40.6786	26.4148	35.5901	49.9836	41.6953	56.9103	67.6085	19.1929	12.1568	12.5893	12.5235	13.2247	34.2278	49.5297	54.365	49.0683	14.2438	18.3654	40.1409	27.6483	29.6082	24.1016	36.1339	43.5942	48.389	46.4556	27.5313	42.3586	65.0176	12.7157	brown
JreChr01G12337	3.27925	3.3978	2.19516	1.24974	0.549111	0.098999	1.61499	0.114568	0.424452	1.24829	0.583432	0.882421	1.11067	0.116129	0.911737	1.91716	0.869405	1.52803	3.22284	1.46963	2.10552	3.16413	6.66103	7.99783	2.9574	0.632615	0.718002	0.904716	0.712845	1.4382	2.266	5.941	2.67747	1.68827	0.506138	1.29518	1.80405	5.04135	6.02953	1.05431	2.08069	0.929595	0.668816	0.56626	0.569067	1.14016	1.56649	1.28159	blue
JreChr01G12357	22.3781	21.4428	20.9018	12.1963	11.7866	14.7148	11.8065	11.614	13.5411	6.27291	6.43963	7.26481	8.84064	7.96726	6.59004	16.4342	9.59812	15.4106	10.28	6.38671	14.0736	7.50907	11.3193	16.1356	21.5742	12.8992	12.3205	6.65911	7.79931	13.8143	10.2468	11.6546	12.0051	10.9977	9.83114	8.4237	25.1343	44.606	41.3309	34.1705	25.3289	25.7656	21.0839	19.5898	21.0476	19.8171	20.2673	5.98199	turquoise
JreChr01G12362	3.90278	6.3071	8.49268	12.4105	18.2521	15.5799	14.0359	9.66223	14.9156	10.0517	12.5823	14.7065	7.93935	7.72358	7.33202	6.84067	10.6762	9.39115	25.8626	26.5337	24.59	21.8671	29.1937	30.9837	6.23419	15.4142	12.8713	12.4468	7.66499	8.96935	25.6621	27.3482	16.0358	12.5338	10.8848	24.3708	0.037504	1.37291	0.115173	1.47154	7.08271	0.19095	0.332232	0.00738667	0.124945	0.039511	5.61838	18.4629	blue
JreChr01G12364	78.6992	67.841	67.6161	53.0876	55.7617	71.4301	60.7065	40.859	51.3706	28.3063	20.4042	26.9477	37.5584	48.2531	33.8751	46.7391	55.7504	43.1867	48.3847	34.0229	42.7548	24.4925	29.7328	51.8993	71.3854	60.0932	50.9787	25.2194	39.8955	48.5588	41.7208	35.3749	21.8046	33.4943	45.8763	49.7011	100.962	86.8263	58.292	81.9751	69.8299	84.1452	77.8957	87.9812	92.1573	72.457	76.409	30.7851	turquoise
JreChr01G12377	50.4126	23.6886	41.9491	21.069	24.661	17.4901	16.383	19.115	13.669	9.14125	11.3358	6.74636	8.15113	8.19169	8.10897	18.556	10.9629	18.1904	26.0209	22.2471	27.2025	13.9222	11.062	10.7586	38.6834	21.0734	16.389	9.07448	8.1506	15.9031	25.1568	11.9143	12.1499	11.4256	19.6036	12.3451	34.1332	37.4795	29.9547	61.9094	40.7465	69.933	38.6554	63.1687	50.89	60.4318	44.8765	7.90542	turquoise
JreChr01G12379	4.74753	1.58628	1.86666	0	0	0.065458	0	0	0	0	0	0	0	0	0	0	0	0	0	0	0	0	0	0	2.73349	0.0218193	0	0	0	0	0	0	0.150135	0	0	0.063036	18.4273	1.35214	0.13144	0.20727	0.162781	8.52744	2.34906	4.25964	0.182797	0.0891807	3.2766	0.0223013	turquoise
JreChr01G12382	7.25427	5.48655	4.4194	6.00032	6.95727	6.84139	2.96441	2.68989	2.50955	1.55681	1.47959	1.58074	1.8257	1.31479	1.16365	1.32062	1.13823	1.28864	0.001464	0.68161	0.364565	0.018118	0.001455	0.006455	5.72007	6.59966	2.72128	1.53905	1.43471	1.24916	0.349213	0.008676	0.003162	1.62929	2.23967	4.556	3.51832	1.53498	0.632179	0.414916	0.00710533	2.82078	2.10256	1.69239	0.863327	0.719024	8.02787	1.83052	turquoise
JreChr01G12389	6.92158	9.26932	8.68245	5.36727	9.41357	6.59193	5.87383	4.1302	4.32192	2.97955	5.3391	5.50645	4.88961	2.35913	2.78404	4.76585	4.86149	5.93198	9.19805	10.0769	7.34055	14.3481	15.4952	6.29465	8.29112	7.12426	4.77532	4.60837	3.34426	5.18644	8.87182	12.046	8.156	10.6661	2.87052	10.7056	4.77499	10.1485	19.7327	8.22257	6.28213	7.10601	7.65069	7.63391	7.33997	9.51461	7.45039	5.56543	brown
JreChr01G12390	192.99	212.469	220.306	140.678	187.626	189.698	48.2142	42.1747	40.5637	98.4137	70.4333	3.69367	73.3249	72.2357	64.4475	87.9425	44.3049	59.6328	35.8971	60.6235	34.1197	11.927	15.8222	26.6549	208.588	172.667	43.6509	57.5136	70.0027	63.96	43.5468	18.1347	28.0333	33.5759	30.732	91.244	463.33	195.153	113.109	45.6122	12.4787	303.951	302.431	253.42	198.45	184.473	131.218	38.0843	turquoise
JreChr01G12391	95.1409	79.8836	99.8228	51.0107	50.092	11.2638	42.0076	42.465	37.8554	50.8255	42.6193	53.42	51.9245	49.2165	47.1717	103.3	71.2369	136.28	146.816	19.9043	157.24	159.482	59.3169	236.823	91.6158	37.4555	40.776	48.9549	49.4376	103.606	107.987	151.874	113.478	70.1268	60.6511	53.4592	133.776	208.877	221.747	306.177	366.304	196.536	250.402	328.544	412.931	363.887	91.3473	47.0942	blue
JreChr01G12393	3.43628	0.841992	0.013918	4.74275	4.42623	6.32809	23.3522	17.1162	13.2253	14.1625	10.1561	10.9671	20.6933	5.86876	6.75294	5.88478	6.34595	3.80389	4.88112	6.16668	3.65912	3.47114	1.72503	5.78555	1.43073	5.16569	17.8979	11.7619	11.105	5.34487	4.90231	3.66057	53.7225	36.6374	18.4318	31.8564	3707.65	1755.98	2164.71	691.04	47.3601	502.209	212.993	128.18	100.491	106.879	0.940195	17.8097	red
JreChr01G12398	21.5581	18.9736	16.0014	2.70667	3.45763	3.49981	0.954795	0.918462	1.00875	2.40991	1.86408	2.55056	1.979	2.42108	2.31758	4.29702	1.99215	3.85646	9.55888	6.371	9.66853	7.16454	6.65463	8.71789	18.8444	3.22137	0.960668	2.27485	2.23922	3.38187	8.5328	7.51235	6.24891	4.44223	2.69723	1.81161	20.7447	29.1651	29.2713	19.0553	11.4185	17.6497	23.3748	27.8006	29.116	29.5942	21.2061	1.35142	turquoise
JreChr01G12399	2.15897	5.89852	5.75906	1.17629	1.29126	1.72981	0.350977	0.853947	0.012897	0.129395	0.007412	0.017264	0.011514	0.059911	0.438405	0.028415	0.431653	0.004551	0.002866	0.006496	0.05898	0.00022	0.009573	0.017789	4.60552	1.39912	0.40594	0.051357	0.169943	0.154873	0.0227807	0.009194	0.01035	0.006557	0.010415	1.09162	5.98461	1.44711	1.29672	1.0698	0.215671	4.39453	3.88174	3.09406	1.78436	1.79387	1.43768	0.00551833	turquoise
JreChr01G12401	29.786	29.3526	2.07992	1.8029	4.17373	3.57097	1.6864	1.17517	0.39752	2.06696	5.88399	0.396596	1.12999	2.45247	3.38564	6.00204	4.24629	5.44904	9.56919	4.50223	4.83036	4.26818	0.526545	0.607656	20.4062	3.18254	1.08636	2.78251	2.3227	5.23246	6.30059	1.80079	7.59301	2.02241	14.4451	8.46214	13.4151	6.62987	8.48605	4.65103	9.38816	1.1795	2.09547	1.09548	3.58076	2.65443	5.15455	7.79335	turquoise
JreChr01G12406	147.027	117.594	116.886	0.11619	3.42259	4.70276	0.18111	0	0	0	0	0	0	0	0	0.101248	0	0	3.52378	2.12252	1.70705	10.1954	9.55223	13.4709	127.169	2.74718	0.06037	0	0	0.0337493	2.45112	11.0728	138.306	63.4773	0.272541	0.054808	3.35719	3.57351	0	0.207246	2.22519	9.20256	6.2929	12.3237	3.34778	3.70512	172.69	0.0204553	turquoise
JreChr01G12408	184.085	139.916	194.774	48.4239	48.6501	33.9875	46.1714	28.4275	51.2534	37.9484	56.6967	47.7167	25.2834	29.5337	18.8351	24.9283	28.9609	30.1249	62.4765	49.7405	51.3414	85.3865	78.2993	82.8949	172.925	43.6872	41.9508	47.454	24.5507	28.0047	54.5195	82.1936	78.6202	66.4169	37.7615	28.2518	74.4095	244.56	242.776	93.8752	89.6268	195.533	210.441	87.3758	90.7008	288.6	175.216	68.5144	turquoise
JreChr01G12417	0.918686	0.27697	0.161393	1.7163	1.4321	0.621617	2.0877	3.35086	3.24724	1.89475	1.83409	3.29278	3.86071	2.42683	2.5209	6.72953	3.42455	4.7195	0.660915	1.75066	0.004682	0.429471	0.212247	0.003396	0.45235	1.25667	2.89527	2.34054	2.93615	4.95786	0.805419	0.215038	1.00926	1.80879	4.58267	1.59994	7.52798	14.919	11.8536	11.0824	4.90047	0.542258	1.16445	1.18551	1.06843	0.503635	0.418119	2.0657	red
JreChr01G12418	5.74808	4.11629	3.80301	1.93867	1.90031	2.49597	1.88497	1.37284	2.14188	0.808513	0.582481	0.893335	0.892115	0.804833	1.05136	1.10343	0.016078	0.364327	0.021444	0.525063	0.007405	0.001495	0.019461	0.088791	4.55579	2.11165	1.7999	0.761443	0.916104	0.494611	0.184637	0.0365823	0.085724	0.503863	0.058127	2.57601	5.4204	3.3892	2.21772	1.54492	0.157693	6.96015	6.46582	4.44794	3.26092	4.79015	4.02192	0.368301	turquoise
JreChr01G12419	23.2425	21.9818	18.5456	2.6041	4.19157	5.80198	5.55374	4.28995	4.46013	1.93582	1.44463	1.98307	1.64354	1.09196	0.765467	4.76401	2.11578	3.25781	12.3271	6.02127	5.99813	14.1018	7.8243	13.8228	21.2566	4.19922	4.76794	1.78784	1.16699	3.3792	8.1155	11.9163	17.8028	8.86917	3.52329	4.05701	20.1292	25.3291	29.9986	32.2774	20.6894	44.6812	43.4654	47.4331	42.6258	50.6245	21.0009	1.72095	turquoise
JreChr01G12420	4.52327	2.37758	3.96098	6.23872	6.02071	6.60496	9.35113	11.6239	13.3168	5.72448	5.62589	5.21178	11.7348	10.9408	10.9349	19.9195	17.5452	17.4721	24.3839	16.5784	19.4135	30.1906	23.9747	37.2808	3.62061	6.28813	11.4306	5.52071	11.2035	18.3122	20.1253	30.482	18.8971	15.1675	16.1191	12.9969	18.9875	25.5671	7.00702	13.4097	13.5867	10.4102	11.7761	15.6453	8.82947	11.7738	4.07438	18.3417	blue
JreChr01G12426	13.9443	13.8194	12.9078	7.4403	9.27744	11.0518	7.76862	7.10714	10.6633	4.43668	5.86639	4.43451	6.60484	8.69282	7.07694	5.78977	10.2532	5.66929	13.1012	9.82142	16.3267	13.4044	10.9915	12.0033	13.5572	9.2565	8.51303	4.91253	7.4582	7.23741	13.0831	12.133	9.74314	15.0311	11.7955	9.29046	10.3633	8.35218	5.51425	6.06932	6.66551	7.40553	7.93506	6.53109	7.13921	5.88982	13.831	8.3091	brown
JreChr01G12431	32.1018	17.7326	19.8393	1.74744	3.88602	4.2717	0.795793	0.977011	1.61226	1.69579	1.14986	1.7191	2.56131	3.35191	2.22463	3.68245	2.52199	3.00225	2.08909	2.73547	2.744	3.3942	2.50047	2.35778	23.2246	3.30172	1.12835	1.52158	2.71262	3.0689	2.52285	2.75082	5.03515	3.46866	2.33638	1.80419	22.6371	9.17592	11.1513	7.04371	5.82294	19.643	16.4432	18.3326	14.8047	13.6624	20.9826	1.00531	turquoise
JreChr01G12432	20.3263	20.5637	19.3222	9.97269	9.25055	10.0798	10.5277	6.4456	9.39466	3.31869	5.10492	4.10285	4.8781	3.96838	4.1935	7.38554	5.07376	7.27971	7.99905	9.61731	7.47162	8.1087	8.98393	13.7895	20.0707	9.76768	8.78934	4.17549	4.34666	6.57967	8.36266	10.294	7.68307	6.76498	4.33084	7.66899	9.99389	10.3544	9.15889	13.6748	12.1635	16.9164	19.564	22.2415	20.0609	14.9726	16.6827	6.83229	turquoise
JreChr01G12437	70.8915	68.5365	62.8007	26.3063	26.2243	38.4356	28.4369	31.813	31.3751	12.7902	12.0472	16.4456	20.1161	15.727	14.6939	25.6962	20.5748	22.8541	18.4082	17.3267	23.1502	23.6264	27.4831	35.5385	67.4096	30.322	30.5417	13.761	16.8457	23.0417	19.6284	28.8826	27.4532	29.4546	18.3029	24.4882	68.9606	44.3792	37.3717	42.8395	46.1226	72.1876	65.5883	59.9497	55.5248	49.5216	74.9721	22.0016	turquoise
JreChr01G12440	114.23	127.13	148.577	42.5832	9.74079	40.9498	31.6869	18.235	5.75584	14.6247	14.2129	10.8568	11.3274	12.0667	18.2277	8.10825	4.06869	10.9174	1.07179	2.58711	1.89435	0.538524	1.49263	0.216353	129.979	31.0913	18.5592	13.2315	13.8739	7.6981	1.85108	0.749169	10.9444	22.3602	29.129	33.8772	22.6511	12.4955	6.48944	15.5003	14.8187	31.5811	13.6695	14.8108	13.6136	12.3713	124.511	17.7215	turquoise
JreChr01G12441	77.3047	82.0114	77.8481	3.85971	6.61345	10.4943	1.81248	0.763035	0.536815	0.465718	0.525094	0.722952	0.735292	0.543835	0.765049	0.400661	0.25556	0.178262	0.252894	0.266737	0.353019	0.041588	0.070109	0.091448	79.0548	6.98915	1.03744	0.571255	0.681392	0.278161	0.290883	0.067715	1.79265	1.79119	1.33533	1.89672	62.6826	31.4596	28.578	26.9515	17.5846	70.7349	90.6583	71.8835	80.6743	67.5878	62.6964	0.550337	turquoise
JreChr01G12450	20.1566	14.5594	16.2816	26.5082	29.9414	26.0783	8.89199	9.85559	12.3152	16.884	14.9317	17.2068	13.7135	13.1399	11.0524	20.2946	18.7364	21.2224	32.4679	24.1375	29.6315	46.0557	50.296	41.2276	16.9992	27.5093	10.3543	16.3409	12.6353	20.0845	28.7456	45.8598	25.5808	25.0403	13.4019	22.1236	20.0111	19.7699	24.0058	48.2877	69.6156	25.9147	35.1158	43.5818	42.8803	37.9952	17.621	13.4875	blue
JreChr01G12458	59.4749	49.0776	49.3637	19.8555	23.9415	35.197	11.8864	17.9882	20.2386	13.5702	16.1517	13.8335	15.6062	11.0093	16.9459	30.2715	21.1777	40.8926	26.6287	31.5306	26.9959	23.8299	22.2724	26.5322	52.6387	26.3313	16.7044	14.5185	14.5205	30.7806	28.3851	24.2115	27.0807	15.0888	23.9067	29.9047	0.008923	0.515643	0.936854	1.96003	2.59214	0.00405033	0.004881	0.00425667	0.210896	0.118342	50.8037	12.5261	turquoise
JreChr01G12469	0.750226	0.098349	0.832111	0.932662	0.862326	0.605478	0.876918	1.03447	1.36431	2.90423	12.3821	3.42015	0.344858	0.607119	2.72136	1.27364	2.90633	8.14071	2.43549	0.804991	2.01771	0.783029	1.45758	3.16066	0.560229	0.800155	1.0919	6.23551	1.22445	4.1069	1.75273	1.80042	0.583892	0.735595	8.55468	1.96021	1.04688	1.05294	2.39345	1.68295	2.14139	1.19054	1.45051	1.65455	1.28102	3.12658	0.777712	1.20971	green
JreChr01G12477	46.3113	26.4717	52.8115	32.557	29.7506	32.9179	39.9804	31.1501	28.8351	15.9529	16.6602	17.8639	21.3296	20.4372	19.3511	35.1831	24.6132	26.944	24.7756	23.1626	29.9077	34.5037	25.5314	30.8587	41.8648	31.7418	33.3219	16.8256	20.3726	28.9135	25.9486	30.2979	21.1316	26.5725	25.1801	31.7134	46.5009	46.8171	38.6514	72.0233	57.8762	65.3032	74.0726	87.2116	29.3075	58.2417	39.1564	27.8007	turquoise
JreChr01G12478	25.9571	19.9831	29.7915	1.37142	3.43802	1.80492	1.21562	0.106454	2.24995	2.26861	2.99758	1.69613	0.279064	0.90487	1.56938	1.38928	0.478725	0.37296	0.02613	0.098443	0.05523	0.391783	0	0	25.2439	2.20478	1.19068	2.32077	0.917772	0.746988	0.0599343	0.130594	1.18629	2.11509	0.01515	2.72255	39.5953	27.2923	13.1574	10.9077	4.72982	19.825	18.5439	19.0277	21.5943	22.3842	19.1857	1.26634	turquoise
JreChr01G12479	12.9151	12.0261	15.596	1.08725	2.48154	0.742565	0.223149	0.490422	1.13877	1.29527	0.986106	0.933409	0.755754	1.88583	1.17807	0.51935	0.39756	0.641403	0.500815	0.003394	0.006184	0.34384	0.053364	0.273218	13.5124	1.43712	0.617448	1.07159	1.27322	0.519438	0.170131	0.223474	1.98856	2.0974	0.873385	2.50674	35.9535	35.6927	12.9546	10.2868	4.33561	14.1953	26.6452	14.3324	15.612	16.6225	10.0049	0.759009	turquoise
JreChr01G12484	1.41111	10.1478	19.4975	12.5088	10.1862	1.43689	1.20609	1.32436	0.633675	4.24952	7.36386	0.565376	1.92261	0.816667	0.997868	7.66361	5.23538	1.47949	1.547	8.21503	1.89097	1.07738	0.60491	1.57418	10.3521	8.04399	1.05471	4.05959	1.24572	4.79283	3.88433	1.08549	9.80663	0.726353	6.42242	0.982728	5.94815	5.68587	11.8309	6.4962	1.0313	1.37363	1.16949	1.97365	1.08691	1.64527	6.78852	2.56896	turquoise
JreChr01G12486	28.7048	25.2784	27.3159	19.8816	26.2352	24.5482	15.4056	14.187	16.1494	14.9762	11.9467	9.61938	14.6987	14.3256	12.6547	8.96901	12.2512	13.1254	16.5728	18.118	14.6828	16.9043	19.2644	27.5092	27.0997	23.555	15.2473	12.1808	13.893	11.4485	16.4579	21.226	19.6897	17.5545	15.3918	13.8245	13.2834	13.1386	12.6774	17.8316	20.57	16.87	14.7351	17.4633	12.2157	12.5269	19.8571	13.5173	turquoise
JreChr01G12487	0.000823	0.002435	0.001425	2.2e-05	0.001058	9.5e-05	0.003906	0.000356	0.005837	2.28158	2.37426	1.43944	1.90622	0.470289	0.003263	3.61972	2.78353	4.77218	7.2059	2.99929	5.89287	14.1791	9.31765	3.10586	0.001561	0.000391667	0.00336633	2.03176	0.793257	3.72514	5.36602	8.86752	0.024354	0.020308	0.003672	1.88389	0.003707	0.000934667	0.756441	0.00456967	1.50315	1.5554	2.07177	2.42863	1.88586	2.33388	0.00162233	0.717851	blue
JreChr01G12489	27.8027	36.8179	30.5621	12.9689	13.9342	24.6159	8.24241	7.79741	9.89417	8.83032	8.87406	9.89968	11.3221	12.8284	11.223	23.0882	15.3128	24.7981	23.2931	14.4965	2.51973	18.5468	24.1362	26.2871	31.7276	17.173	8.64466	9.20135	11.7912	21.0664	13.4364	22.9901	8.51088	12.1188	8.94961	12.8649	36.5176	20.4082	16.8449	20.39	20.8936	24.3208	21.6545	24.1327	18.7298	22.4516	43.2212	6.63173	turquoise
JreChr01G12491	5.28327	3.82835	4.25959	0.921166	1.60712	1.95126	0.024155	0.177931	0.069893	0.033787	0	0.139601	0	0	0.022407	0.355752	0.038598	0.264425	0.298052	0.050955	0.328359	0.14349	0.135103	0.200348	4.45707	1.49318	0.0906597	0.057796	0.007469	0.219592	0.225789	0.159647	0.213466	0	0.096219	0.80853	11.5366	1.02001	0.367062	0.756335	1.88988	5.03682	2.46911	5.26425	1.89452	1.96703	4.80873	0.0317603	turquoise
JreChr01G12495	10.3462	9.8603	9.91889	0.435151	1.10826	1.34204	0.871627	0.004407	0.455343	0.0159	0.016594	0.021059	0.323632	0.011531	0.01333	0.738217	0.009821	0.609651	0.024766	0.288701	0.594516	0.071119	0.038809	0.006653	10.0418	0.961816	0.443792	0.017851	0.116164	0.452563	0.302661	0.0388603	0.030037	0.63493	0.491642	0.021571	8.45788	3.32252	4.00546	3.96606	9.42252	6.8195	11.044	12.9601	15.9446	15.2018	7.86389	0.00693367	turquoise
JreChr01G12498	12.4323	10.2976	13.9622	4.51754	12.8452	4.68228	0.865348	0.270662	5.13894	2.99426	1.79852	1.41116	2.24123	0.71842	1.89674	11.889	1.51451	14.3769	0.778183	0.662116	0.211715	0.326955	0.520454	1.15404	12.2307	7.34835	2.09165	2.06798	1.6188	9.26011	0.550671	0.667149	9.30913	4.73324	2.5331	7.17555	38.3684	106.953	115.598	145.392	113.205	15.0689	22.904	27.5968	25.7532	16.0038	8.76982	0.589721	turquoise
JreChr01G12499	54.1948	69.9575	48.9098	1.73871	20.0396	20.4578	13.6396	20.9007	24.0193	7.67931	4.16219	9.54003	12.0959	12.5687	6.42805	4.20924	8.31897	13.9215	11.7951	8.18906	9.33928	17.2825	0.502572	19.9006	57.6874	14.0787	19.5198	7.12718	10.3642	8.81657	9.7745	12.5619	15.7074	24.3361	21.0705	13.931	26.2943	24.2074	15.9986	15.847	26.6242	23.8296	48.7423	56.5664	32.7575	40.8092	57.7789	10.6379	turquoise
JreChr01G12501	97.4786	86.6228	77.1269	4.23021	41.6446	50.582	70.361	59.8936	61.7886	30.2904	33.0959	31.2425	30.3866	35.5905	35.4018	39.6314	38.1629	38.4435	35.5525	33.187	34.8298	31.7184	31.5405	38.9255	87.0761	32.1523	64.0144	31.5429	33.793	38.7459	34.5231	34.0615	44.8756	49.8553	46.3986	37.4584	51.8715	57.9612	59.4024	46.4877	41.9986	51.2135	50.7267	55.5712	55.8696	43.2063	80.3283	37.9831	turquoise
JreChr01G12502	16.1367	13.9742	14.2934	12.6437	14.1261	13.5865	13.1784	10.3024	9.58932	4.34264	5.18409	5.47296	4.05555	1.42907	4.01828	5.17634	5.46143	6.38167	7.73538	5.55169	5.78056	12.2941	11.6584	11.9095	14.8015	13.4521	11.0234	4.9999	3.16763	5.67315	6.35587	11.954	12.7482	11.8642	7.72938	10.5253	10.6062	9.40912	12.5606	10.5875	10.2761	10.8478	9.8635	10.8443	8.13136	6.57653	14.6033	8.11967	turquoise
JreChr01G12503	17.2181	11.3866	0.064222	0.070887	0.086503	0.102959	0.050467	0.033149	5.69358	0.124188	3.32883	0.255356	0.131889	3.28695	0.164759	0.149692	0.10856	0.230538	0.153325	0.090253	0.117546	14.4526	14.3003	18.9108	9.55631	0.086783	1.92573	1.23613	1.19453	0.16293	0.120375	15.8879	6.29219	6.96402	5.32561	0.133322	17.5921	9.15564	19.6041	0.0845983	13.059	11.1143	9.93287	0.17793	0.106422	10.3363	4.35187	0.0497483	brown
JreChr01G12504	26.0956	25.0521	24.2235	12.6705	15.0642	12.8647	9.92862	10.1173	13.1122	13.5899	16.2753	14.7032	11.8868	14.9241	14.8503	34.4429	19.7228	41.7957	40.4739	28.9395	45.196	56.7108	52.2454	66.5479	25.1237	13.5331	11.0527	14.8561	13.8871	31.9871	38.2031	58.5014	44.5858	41.1	38.6584	9.88317	26.4172	34.5175	52.832	71.5232	60.2281	55.7713	52.468	45.9782	48.1674	67.0917	25.1167	19.2109	blue
JreChr01G12509	57.9701	117.657	0.923009	42.06	35.0345	61.5795	2.04089	3.88558	11.051	6.95888	9.68277	7.84422	6.41292	3.48958	12.948	6.53708	12.5334	11.8304	6.46153	4.56433	5.96562	9.75286	8.96694	16.7216	58.8501	46.2247	5.65916	8.16196	7.61685	10.3003	5.66382	11.8138	26.3988	37.5007	10.9945	27.4132	117.09	25.3889	20.8466	28.9879	13.5686	133.191	136.297	111.287	67.134	44.9451	53.6969	19.136	turquoise
JreChr01G12513	16.9189	25.6894	22.79	5.53352	6.4252	7.78629	4.19109	3.8567	1.87305	1.87683	1.81557	1.90992	3.55342	2.89216	1.60513	5.05913	3.81496	4.09425	4.07493	4.39831	3.9175	3.79236	7.26769	6.54859	21.7994	6.58167	3.30695	1.86744	2.68357	4.32278	4.13025	5.86955	6.40792	3.94216	3.57855	3.90191	15.4591	9.54096	9.33011	5.98511	5.1488	6.25114	4.16945	3.58657	3.72348	3.5077	15.6075	3.32287	turquoise
JreChr01G12514	16.8072	15.7098	15.0694	6.75286	6.96628	8.12256	5.64778	5.29011	4.22162	2.81459	1.87851	2.68281	2.24981	1.04853	3.23596	4.86803	2.38272	3.52144	3.53008	2.56821	4.59619	5.01253	4.23915	5.49292	15.8621	7.28057	5.05317	2.45864	2.1781	3.59073	3.56483	4.91487	3.11784	3.44253	3.12958	5.44199	16.6393	10.2518	10.4672	16.36	13.7043	7.23619	6.08296	9.79338	7.66148	6.07672	15.4289	2.07837	turquoise
JreChr01G12516	34.5319	34.8226	31.3631	11.375	14.1887	10.378	7.83154	9.17825	9.50412	4.0204	6.20918	5.33188	8.4149	5.80983	5.93893	14.3439	10.4564	16.685	19.1856	14.4246	16.4653	31.8541	25.6967	10.3454	33.5725	11.9806	8.83797	5.18715	6.72122	13.8284	16.6918	22.6321	29.9325	22.214	8.06531	15.0431	53.4825	52.0251	18.3538	39.1049	31.2723	60.9831	69.2437	55.7813	47.8787	47.086	29.6512	9.96513	turquoise
JreChr01G12522	7.24133	5.30352	6.58242	5.11788	9.48976	5.42699	5.28432	2.52981	1.50666	5.19756	2.75998	2.77926	3.05572	2.78062	1.00903	3.15275	3.97436	2.88786	6.74567	7.36201	6.03121	11.533	8.91001	14.8526	6.37576	6.67821	3.10693	3.57894	2.28179	3.33832	6.71296	11.7652	5.40133	4.53573	3.65726	7.50412	8.06797	6.14531	9.18511	9.45526	14.1021	5.31479	6.49932	4.42746	6.71639	3.4481	5.59381	1.08764	blue
JreChr01G12526	4.83568	6.21814	9.96863	1.03888	2.18074	0.817992	7.2119	5.28277	8.14895	8.20691	8.73029	7.81654	5.14002	6.5458	4.98821	14.6568	7.82724	13.3604	2.53667	4.83268	3.82975	1.78254	1.43889	3.09293	7.00748	1.34587	6.88121	8.25125	5.55801	11.9481	3.73303	2.10479	11.718	16.0899	2.37349	7.20932	5.05021	5.49639	1.17665	4.08177	1.63517	26.3824	52.8892	108.136	238.917	204.915	6.41979	5.8654
JreChr01G12528	12.6844	8.69354	6.23075	2.868	0.596711	1.75281	0.002648	0.00158	0.062518	0.00054	0.000324	0.009945	0.735935	0.005318	0.000587	0.10924	0.003379	0.002992	0.001168	0.061721	0.001897	0.009887	0.003052	0.006907	9.20291	1.73918	0.0222487	0.003603	0.24728	0.038537	0.0215953	0.00661533	3.28734	1.9441	0.011407	1.63981	108.33	65.631	27.0668	26.0394	27.6453	0.542843	1.02799	0.763215	1.1597	0.410567	8.62009	0.011741	turquoise
JreChr01G12532	5.49963	7.87717	6.32439	0.891103	0.460063	0.587203	0.191819	0.336294	0.14747	0.460713	0.25894	0.249547	0.360118	0.690986	0.879233	0.44257	1.08236	0.902865	0.547388	0.425061	0.279709	1.00492	1.36603	2.1355	6.56706	0.646123	0.225194	0.323067	0.643446	0.809266	0.417386	1.50215	2.35636	1.23608	0.157725	0.078155	1.86615	3.13554	1.50411	0.875155	1.8051	1.05517	0.610495	1.40274	0.986638	1.0452	3.71871	0.067608	turquoise
JreChr01G12533	9.35604	7.56524	6.88325	6.66239	5.56293	6.02195	6.32439	4.41638	6.94243	3.84093	4.18221	5.81506	2.57991	3.28605	3.48604	6.38798	7.08662	6.02844	8.61285	7.9135	12.0209	11.3542	11.5523	15.4802	7.93484	6.08243	5.8944	4.61273	3.11733	6.50101	9.51577	12.7956	9.87154	7.37463	5.28815	6.39178	7.47598	7.18543	6.58311	8.50154	12.8025	15.9449	13.6913	14.1212	6.36638	6.5889	7.58312	6.13106	blue
JreChr01G12534	7.80864	6.11739	8.61483	4.97471	3.42591	6.08914	4.66668	4.2035	3.96139	1.73153	1.76405	1.05205	2.28074	2.33319	1.98576	2.05407	3.22046	2.65537	5.86437	1.64598	3.50428	3.90445	2.80427	2.38667	7.51362	4.82992	4.27719	1.51588	2.1999	2.6433	3.67155	3.0318	5.72279	3.78159	3.453	4.31222	6.94645	7.81895	8.25696	8.9012	6.84897	11.6349	9.92096	9.08443	8.22594	8.99592	7.83092	3.45228	turquoise
JreChr01G12535	24.3127	20.305	20.4337	2.55929	6.23858	7.98744	0.105145	0.835715	1.44193	0.002839	0.076313	0.002089	0.009466	0.00128	0.000775	0.573566	0.114871	0.832819	0.006792	0.018068	0.000419	0.04258	0.029935	0.021264	21.6838	5.5951	0.794262	0.0270803	0.00384033	0.507085	0.00842633	0.0312597	0.002964	0.010111	0.00368	2.0909	25.6548	10.6115	4.28243	2.21137	1.60495	12.0772	19.6313	14.1919	10.2508	9.20488	19.1385	0.019467	turquoise
JreChr01G12544	8.11649	7.19548	6.87873	0.194248	0.319713	0.331432	0.638493	0.286599	0	1.9099	0.618322	0.751956	0.375238	0.970798	0.061883	0.356311	0.431258	0.307909	14.9682	7.21269	18.6125	12.0021	9.22749	12.7129	7.3969	0.281798	0.308364	1.09339	0.469306	0.365159	13.5978	11.3142	22.5932	15.9824	2.17612	1.30406	14.9106	14.564	8.05073	10.5004	47.6312	45.5682	34.7795	48.8601	34.4929	26.3373	6.68766	0.710314	blue
JreChr01G12548	0.323468	0.717749	0.462297	0.357761	0.477548	0.005889	0.107366	0.026442	0.829463	1.61139	1.12807	1.7715	1.82005	0.659814	6.83793	8.2717	1.77438	3.60294	0.503232	0.08197	0.005145	0.110457	0.003114	0.009576	0.501171	0.280399	0.32109	1.50365	3.10593	4.54967	0.196782	0.041049	0.017749	0.0107	0.018939	0.71353	14.3076	5.52882	3.9588	4.49307	48.1237	23.3465	20.1669	15.9449	3.94182	0.204162	0.976766	0.469413	green
JreChr01G12552	0.658473	0.59354	2.41865	0.047242	1.33859	0.063338	1.32464	0.798475	1.99136	4.30346	7.78278	6.47498	7.32433	7.70177	2.44742	8.66037	9.33185	12.5864	16.7872	11.3978	18.605	23.751	14.8743	17.186	1.22355	0.483057	1.37149	6.18707	5.82451	10.1929	15.5967	18.6038	21.4458	12.5222	2.58717	3.05778	7.69969	4.99475	7.58664	10.9994	17.1532	1.99817	0.881642	1.07122	1.27098	1.11908	0.740034	4.45076	blue
JreChr01G12559	3.36342	3.34275	5.65081	2.82311	3.74987	2.79627	130.082	2.77549	2.65135	4.60833	4.83436	3.04181	5.46631	4.06184	6.07364	2.34959	2.29093	4.27254	63.7291	87.735	2.75296	108.895	2.50114	3.53392	4.11899	3.12308	45.1695	4.1615	5.2006	2.97102	51.4057	38.3101	5.36303	3.58377	83.309	3.03746	77.5544	133.416	2.27887	35.138	59.2841	48.7165	45.658	11.5466	64.5716	3.28207	4.63253	2.9681
JreChr01G12567	10.6667	12.0559	11.9927	14.0419	13.202	11.9542	13.084	10.362	9.07962	4.33561	0.164847	5.30905	5.60639	4.82985	5.01354	8.65736	6.49374	7.12711	13.0706	15.0541	16.7036	0.209179	15.2125	16.4976	11.5717	13.066	10.8419	3.26984	5.14992	7.42607	14.9428	10.6397	20.5344	16.7215	4.82682	14.7439	13.7431	9.5849	20.7544	13.3597	15.356	3.33867	1.30263	1.59278	2.49989	4.12554	9.5553	4.62622	brown
JreChr01G12580	20.0605	28.923	23.877	4.63846	4.90186	8.7002	2.75338	1.9775	2.89263	2.35861	1.92186	1.78394	1.93747	2.46861	0.745779	2.92317	3.31901	3.3171	3.22503	2.46468	4.25284	2.64553	3.65285	2.08379	24.2868	6.08017	2.54117	2.02147	1.71729	3.18643	3.31418	2.79406	6.28839	3.71816	1.65946	2.83214	25.5972	29.1387	40.8352	32.3631	18.8795	7.54756	5.33816	4.43622	4.79362	4.76354	25.109	1.03431	turquoise
JreChr01G12581	18.5956	18.5004	18.1749	8.90964	12.1771	12.8729	8.29594	10.3502	11.454	2.97349	2.90921	2.9224	4.18906	3.94687	3.30188	5.96082	4.64143	8.68641	3.76488	5.86702	4.41936	3.80424	3.29686	5.26711	18.4236	11.3199	10.0334	2.93503	3.81261	6.42956	4.68375	4.12274	2.45218	3.81083	6.09711	11.1368	7.6521	7.7824	7.61272	9.01701	7.58254	4.94663	7.38852	7.12303	5.81661	6.66664	17.1072	6.01057	turquoise
JreChr01G12582	28.1027	23.1855	17.9391	6.26894	6.31979	12.2666	6.40792	6.91895	3.94381	4.47164	3.86117	5.22767	6.8964	6.74634	6.8856	7.44821	7.65547	6.92821	5.08999	5.81569	6.80692	9.65331	7.52968	13.3518	23.0757	8.2851	5.75689	4.52016	6.84278	7.34396	5.9042	10.1783	5.94949	6.10094	6.98228	7.47511	26.4471	18.5813	15.0676	15.1186	12.3475	23.9169	19.9691	23.6705	18.9313	18.319	23.6364	4.27592	turquoise
JreChr01G12586	189.663	156.933	143.908	73.2477	69.0632	87.036	77.2141	79.9299	77.291	30.1794	31.3441	29.5818	46.1868	39.9724	54.6994	50.8692	53.8991	61.412	58.084	50.3358	53.1323	68.579	67.3121	101.488	163.501	76.449	78.145	30.3684	46.9529	55.3935	53.8507	79.1263	63.3704	68.5449	51.4692	49.3876	96.7572	97.0385	86.3162	99.3356	70.3535	211.073	212.551	206.471	184.268	132.24	173.57	42.1473	turquoise
JreChr01G12588	0.033195	0	0.02451	0.039895	0.239385	0.035722	0	0	0.029258	1.1031	1.91645	2.29382	0.751736	1.8523	1.07045	0.101909	1.87217	0.46591	38.3564	23.7804	39.54	54.84	44.1523	42.1941	0.019235	0.105001	0.00975267	1.77112	1.22483	0.813329	33.8923	47.0622	35.1332	33.9454	49.9833	0.687431	0.24171	0.081534	0.032826	0.340016	15.0608	0.044516	0.0837527	0.0489773	0.281	0	0	1.84006	blue
JreChr01G12593	6.71697	5.87491	6.33481	2.34459	4.03018	3.82713	1.82283	1.71052	1.59891	1.80314	2.10693	2.09478	2.24735	3.77059	1.43498	3.43133	4.03423	4.12849	1.72312	1.87329	1.16855	0.021855	0.024728	0.012068	6.3089	3.40064	1.71075	2.00162	2.4843	3.86468	1.58832	0.0195503	0.028542	1.50783	0.782088	1.3332	8.30444	0.185179	0.0302887	0.306777	0.0119203	0.0272067	0.0267363	0.198373	0.0327003	0.00232167	6.65908	2.28142	turquoise
JreChr01G12598	7.93346	5.2903	5.08294	0.137311	0.018992	0.930322	0.02883	0.076444	0.00652	0	0	0	0	0.000183	0	0	0	0	0	0	0	0	0	0	6.10223	0.362208	0.0372647	0	6.1e-05	0	0	0	0	0	0	0.001805	3.39952	0.099921	0.002231	0.003479	0	0.170726	0.124787	0.195285	0.00907967	0.001012	7.36475	0.000191	turquoise
JreChr01G12615	47.0365	42.956	35.4769	16.3913	3.34338	4.27145	16.7847	12.9981	13.4641	9.44576	7.49963	9.0196	12.7353	11.5325	8.4591	21.6745	12.5921	22.5012	10.6152	11.7814	7.63816	7.00397	7.55948	11.0714	41.8231	8.00205	14.4156	8.655	10.909	18.9226	10.0116	8.54494	8.66151	9.06798	11.0065	12.4446	44.5248	30.9104	21.9702	20.3672	9.48182	26.4363	32.1701	38.3275	31.3232	35.2407	41.1137	9.30157	turquoise
JreChr01G12632	8.4357	4.97303	9.04548	0.527382	0.636897	0.070199	0.136898	0.01986	0	0.607858	0.075985	0.001425	0.077335	0.075296	0.002828	0.031621	0.00361	0.244033	0.002084	0	0.003487	0.016287	0.00466	0.008471	7.48474	0.411493	0.0522527	0.228423	0.0518197	0.093088	0.001857	0.009806	0.007779	0.169989	0.014299	0.21788	32.8554	32.7087	4.70557	6.05794	0.836353	55.7623	18.1653	32.7051	50.8753	29.6017	4.37871	0.00251267	turquoise
JreChr01G12637	13.2527	12.6776	11.6535	7.09128	10.0497	13.3658	7.44821	9.54508	7.7969	5.92812	4.82196	5.43314	8.46533	5.69941	6.65604	1.43364	8.35518	10.2407	7.33489	4.62242	5.76429	0.604111	0.299591	2.67573	12.5279	10.1689	8.2634	5.39441	6.94026	6.6765	5.9072	1.19314	4.45256	4.09985	6.4215	8.9031	7.24566	12.4954	9.38093	8.11303	8.12562	6.30152	7.54794	7.20873	6.18932	4.69629	7.69077	2.0867	yellow
JreChr01G12651	10.276	12.2414	10.4818	9.49465	12.5826	10.8248	5.52831	7.38211	12.2772	2.49554	4.9043	2.50835	3.47479	4.19933	4.60699	6.6357	7.76316	5.97876	8.71254	5.44025	7.46479	9.2608	9.03503	8.31809	10.9997	10.9673	8.39587	3.30273	4.09371	6.79254	7.20586	8.87131	4.76502	8.01121	1.61738	8.8983	9.04903	11.9222	13.6012	11.3527	16.0997	15.5878	15.0466	13.7827	11.9023	12.2641	10.2868	5.70003	turquoise
JreChr01G12656	32.0446	32.1669	32.3513	26.1474	29.2967	24.1703	15.7564	15.1822	18.133	16.0324	16.1725	15.9209	12.242	13.8409	13.4009	13.3795	9.66479	8.93383	8.20637	10.718	6.04855	5.61733	5.83265	5.99412	32.1876	26.5381	16.3572	16.042	13.1613	10.6594	8.32431	5.8147	19.9645	16.7617	21.7354	16.0709	23.7994	20.2163	23.5946	18.8442	9.77761	27.6059	25.3205	27.9354	20.0495	12.8235	31.14	14.1091	turquoise
JreChr01G12660	18.1089	23.0454	20.1135	7.21058	10.3786	13.8647	3.29855	3.21468	2.83864	2.03363	3.06206	1.98798	1.18043	1.54924	1.42597	3.34883	2.8133	2.78636	4.2415	4.84629	6.65408	5.19903	4.70227	6.88437	20.4226	10.4846	3.11729	2.36122	1.38521	2.98283	5.24729	5.59522	5.70866	4.08309	1.58888	3.50213	22.6295	26.4271	20.2672	11.6507	8.70987	23.9822	26.4063	21.6115	18.7113	17.7687	20.8306	1.10658	turquoise
JreChr01G12668	8.85621	8.92868	8.97838	1.49232	2.36594	2.71097	2.07199	1.47114	1.86746	0.591464	1.64682	0.637438	0.605712	0.854079	0.326198	1.19445	1.72183	0.715825	1.42724	1.81695	1.88174	1.69835	3.77655	3.23503	8.92109	2.18974	1.80353	0.958575	0.59533	1.2107	1.70864	2.90331	3.9246	3.71456	0.252744	0.58588	5.24319	5.50694	8.36622	6.69338	3.54993	4.28863	3.39145	4.69744	3.31131	3.74173	5.59337	0.563527	turquoise
JreChr01G12675	17.211	24.5349	23.3664	16.711	15.9413	20.3444	10.0844	6.69954	7.04107	3.70056	4.57166	3.88097	4.98219	4.76395	5.14517	2.33232	2.52111	1.37124	1.09718	1.70236	2.08899	0.892861	2.48492	0.331903	21.7041	17.6656	7.94168	4.05106	4.96377	2.07489	1.62951	1.23656	11.0282	7.0383	4.77483	11.2427	15.3475	12.0916	4.59342	1.18107	0.684275	2.47979	2.79431	3.37949	2.08756	1.68156	27.7357	6.64077	turquoise
JreChr01G12682	10.8117	16.0851	23.1699	11.671	12.7951	11.5555	4.11504	3.42626	3.51078	0.490214	0.223465	0.303086	0.184858	0.012993	0.005219	0.119145	0.001127	0.232291	0.01593	0.002025	0.000917	0	0	0.019644	16.6889	12.0072	3.68403	0.338922	0.06769	0.117521	0.00629067	0.006548	0.039148	0.844892	0.469274	3.01501	7.61724	3.74501	2.05097	0.800808	0.762761	2.5437	4.76023	4.20846	1.47088	0.0259463	13.2786	0.00450533	turquoise
JreChr01G12683	11.1149	10.1623	10.8628	7.26867	7.56427	6.88804	5.67342	4.01492	5.18492	0.178204	4.49622	0.210381	4.67687	4.06409	6.25432	7.57874	6.77552	6.19875	9.33179	7.65332	0.439272	7.00029	7.36217	10.889	10.7133	7.24033	4.95775	1.62827	4.99843	6.851	5.80813	8.41715	7.22802	7.15104	0.195225	0.513187	9.45219	9.95678	6.66657	6.82143	8.95111	7.10407	7.81122	7.46197	2.40769	6.06508	7.16022	3.708	turquoise
JreChr01G12701	0.639311	0.123176	0.378352	99.7714	0.216174	100.58	130.682	127.369	0.290624	77.9164	0.352847	84.7965	102.241	0.754834	95.7085	90.9207	104.231	0.444929	124.699	0.141471	107.19	0.343529	162.507	194.811	0.38028	66.8558	86.1137	54.3552	66.2346	65.1988	77.3433	119.22	172.245	177.649	98.3737	0.094846	0.801849	81.743	0.134657	0.149172	0.362711	0.216432	0.321019	0.191997	0.280759	36.7533	0.221404	48.9874
JreChr01G12715	2.25309	2.18122	2.46117	16.4941	22.7686	23.4511	12.3718	11.9921	13.696	21.1883	17.8951	24.5257	28.1382	21.7588	22.7127	45.782	27.6116	50.5794	45.4506	40.1237	44.195	53.6833	49.0284	46.0063	2.29849	20.9046	12.6866	21.203	24.2033	41.3243	43.2564	49.5727	14.2552	20.2785	44.9853	17.1922	57.0731	51.1654	57.7137	46.0102	57.937	45.8729	29.499	37.423	40.7225	55.9789	18.7249	14.551	blue
JreChr01G12720	11.6238	18.5508	15.3179	0.002704	0.004559	8.67667	0.000479	0.00069	0.001173	0.000404	0.019032	0.000609	0.001868	0.004487	0.00173	0.011584	0.001216	0.000933	0	0.02088	0.000429	0	0.000696	0	15.1642	2.89465	0.000780667	0.00668167	0.002695	0.00457767	0.007103	0.000232	0.002371	0.008059	0.002513	0.008163	1.0237	8.15761	4.74536	5.1958	0.0144577	0.612403	0.401567	0.039653	0.181276	0.016802	7.84054	0.00942167	turquoise
JreChr01G12724	27.2927	21.2686	20.6466	11.9464	12.9785	9.41297	11.8181	11.1484	13.7305	7.77189	8.92928	9.26263	10.1652	9.36007	9.85835	19.5662	13.4075	17.8983	15.2214	15.7619	17.8663	15.5356	18.3582	18.2884	23.0693	11.4459	12.2323	8.6546	9.79453	16.9573	16.2832	17.3941	17.3334	13.2894	8.69084	11.5979	19.7604	21.3881	22.9544	19.8185	18.3732	22.8023	24.2071	22.6264	20.7492	24.535	21.6461	9.57527	brown
JreChr01G12727	5.78877	1.40434	1.84475	1.83211	3.77068	1.16397	2.59215	2.44046	5.57897	3.3896	2.62248	2.41593	2.47218	7.57038	5.24305	14.5269	10.4989	18.688	38.7848	17.2107	39.7629	32.3797	28.5826	22.6299	3.01262	2.25559	3.53719	2.80934	5.0952	14.5713	31.9195	27.8641	48.3119	21.363	5.3357	6.05879	0.775336	3.56078	0.187451	1.87563	6.06181	13.5435	2.99575	2.90332	1.87256	0.951711	9.15458	2.48325	blue
JreChr01G12736	5.90575	5.69856	4.42372	1.81782	1.94713	2.88316	0.817078	0.911999	1.61727	0.546967	0.644807	0.677106	1.39469	0.89807	0.981011	1.94692	1.86921	1.78356	1.47177	1.30902	1.64463	1.34889	0.516204	0.712009	5.34268	2.21604	1.11545	0.62296	1.09126	1.86656	1.47514	0.859035	0.078239	0.924765	0.021347	2.17898	3.29432	2.32735	2.27816	2.55738	1.82023	2.24222	1.994	1.8045	3.58368	3.25575	5.09415	1.07861	turquoise
JreChr01G12746	2.2458	1.57832	1.26626	0.352124	0.279869	0.814712	0.376259	0.149637	0.354833	0.968812	0.312463	0.291802	0.487278	0.576855	0.568236	1.57844	1.00052	1.39158	4.06347	2.50832	4.74667	8.72209	9.14256	6.77535	1.69679	0.482235	0.293576	0.524359	0.544123	1.32351	3.77282	8.21333	4.27526	2.97551	0.828975	0.404534	14.5021	4.88942	3.75907	2.93057	4.24875	7.35447	7.58439	9.49522	6.11156	5.31171	1.55582	0.301822	blue
JreChr01G12750	44.2054	38.9464	49.0527	19.7188	42.0404	43.0617	3.13531	10.8318	6.42867	16.8749	10.4335	13.6834	8.12079	5.47664	4.90909	11.7544	8.47423	15.6154	0.27632	0.47499	0.391306	0	0.680241	0.049718	44.0681	34.9403	6.79859	13.6639	6.16884	11.948	0.380872	0.24332	2.87435	23.3003	12.8055	13.56	1.9308	0.432042	0.52521	0.447662	0.0123323	9.37592	1.15869	0.533427	1.30347	0.433003	49.271	5.94668	turquoise
JreChr01G12752	6.72057	5.09457	5.43539	2.53136	2.56823	1.70676	3.02841	2.90556	1.20258	1.44798	2.42994	2.21691	1.17345	1.56487	0.893241	0.644272	0.595794	0.846977	2.25845	1.45222	1.57028	1.0085	2.05351	1.12269	5.75018	2.26878	2.37885	2.03161	1.21052	0.695681	1.76032	1.3949	6.69254	2.80796	1.67213	1.65258	14.8947	16.5526	24.8461	28.4829	22.6987	22.0401	13.2182	24.8184	36.7067	16.3938	4.29026	0.960105	turquoise
JreChr01G12760	137.079	128.375	107.278	36.5735	57.5935	71.6958	3.58818	4.71143	4.52557	7.93285	6.50179	3.72411	1.10586	2.77038	2.36034	2.70283	2.22163	2.89047	5.81053	3.09882	9.39849	1.40373	4.80854	2.10561	124.244	55.2876	4.27506	6.05292	2.07886	2.60498	6.10261	2.77263	3.65501	2.42513	5.58089	17.04	15.0749	2.93662	1.47162	1.60046	1.9414	2.92318	0.909727	1.27141	5.24608	4.14952	135.909	2.27274	turquoise
JreChr01G12761	0.029659	0.615313	0.469166	0.910913	2.05174	1.47799	4.42736	4.85392	6.21395	4.64034	2.94717	3.10363	1.84736	1.77337	1.4593	1.62031	1.14078	1.24233	0.029299	0.00894	0.003261	0	0.012245	0	0.371379	1.48021	5.16507	3.56371	1.69334	1.33447	0.0138333	0.00408167	0.101555	2.77456	6.09425	6.76621	3.08681	0.0249667	0.0422027	0.041037	0.008626	4.47393	0.599514	0.136669	0.074794	0.028563	0.479585	3.40873	red
JreChr01G12762	55.1714	85.55	85.2696	55.9495	56.8017	65.4413	72.7152	65.0361	62.5994	36.8715	36.4669	35.0426	34.4505	25.5632	38.4624	24.2902	34.8925	38.6329	40.6766	22.7136	27.4445	31.987	42.4627	30.7509	75.3304	59.3975	66.7836	36.127	32.8254	32.6052	30.2782	35.0669	70.6198	75.5914	49.3398	54.9962	20.2912	17.7824	19.2322	25.4869	30.8707	34.4856	36.9607	37.3744	25.8601	29.835	88.728	35.5314	turquoise
JreChr01G12764	3.76694	2.64554	3.37315	0.002425	0.000277	0.524493	0.000721	0.000175	0.000762	0	0.000524	0.006338	0.003464	0	0.018311	0.011	0	0.002594	0.004984	0	0.024243	0	0.000568	0.015819	3.26188	0.175732	0.000552667	0.00228733	0.00725833	0.00453133	0.00974233	0.00546233	0.007989	0.000813	0.000666	0.004755	2.74271	0.00205567	0.009552	0.00233067	0.000841	0.548611	0.00336367	0.892512	0.137683	0.000967667	3.16667	0.002221	turquoise
JreChr01G12767	48.6907	49.3215	44.6481	14.1442	8.30807	17.4911	21.0157	15.1119	16.3781	4.70509	6.78482	5.83701	8.63056	1.94219	6.49878	12.7055	10.1084	3.97573	13.373	12.9818	13.5515	20.2075	17.7071	27.2293	47.5534	13.3145	17.5019	5.77564	5.69051	8.92988	13.3021	21.7146	15.5052	14.3556	6.88693	4.12887	40.7471	56.0458	51.563	42.9012	31.2232	52.8345	73.4126	77.0079	56.9509	58.4195	34.8128	15.3583	turquoise
JreChr01G12768	8.06659	3.64479	4.4893	50.0649	43.054	37.1779	42.5537	76.9211	169.737	73.132	22.3823	27.2035	140.831	160.19	180.689	706.469	241.118	349.777	922.647	627.673	799.879	789.979	1031.74	1174.89	5.40023	43.4323	96.4039	40.9059	160.57	432.454	783.4	998.872	254.251	330.796	102.392	87.0289	10.9087	83.5285	89.8408	208.262	416.325	3.96478	12.5707	9.31536	15.807	5.20875	9.44453	107.17	blue
JreChr01G12774	2.76158	3.58325	7.98988	0.429626	0.83186	0.961811	0.511672	0.727879	0.922736	0.078545	0.678728	0.053184	0.702579	0.081406	0.103429	0.143043	0.121367	0.834202	0.041184	0.312555	0.103713	0.111445	0.080536	0.456227	4.77824	0.741099	0.720762	0.270152	0.295805	0.366204	0.152484	0.216069	0.123703	0.657792	0.104563	0.356932	1.18506	0.288559	0.243905	0.261594	0.226032	0.595118	0.342424	0.436248	0.44994	0.34533	0.873023	0.440394	turquoise
JreChr01G12775	96.4556	97.3039	105.248	74.8944	109.595	88.2933	112.76	148.658	177.874	62.6063	73.6814	62.8561	60.5101	85.984	86.479	75.6608	72.6361	83.3682	51.0002	45.1657	45.5459	47.3419	47.6832	32.4482	99.6693	90.9275	146.43	66.3813	77.6577	77.2217	47.2372	42.4911	54.5803	137.154	122.283	104.582	96.8105	128.446	138.221	101.753	93.8194	154.456	119.438	93.7862	94.2188	93.8904	101.233	119.09	yellow
JreChr01G12779	26.834	29.1668	49.6832	406.451	546.631	472.94	745.98	641.963	596.6	522.123	475.95	616.892	632.855	577.198	703.127	792.368	907.033	913.582	1140.89	1023.8	1542.75	613.789	668.32	732.972	35.228	475.341	661.514	538.321	637.726	870.994	1235.81	671.694	628.595	264.849	664.335	664.721	187.229	964.291	1063.58	1183.02	1024.89	24.9391	31.298	44.2338	197.959	332.439	54.5772	648.71	green
JreChr01G12783	15.4019	13.934	16.9456	9.04386	10.7904	9.65257	9.25594	7.89454	8.48632	6.77733	7.23161	7.17943	6.76106	6.50026	9.30952	7.54722	10.2821	9.57186	12.4456	10.063	10.7399	17.3654	24.0708	26.7902	15.4272	9.82895	8.5456	7.06279	7.52361	9.13374	11.0828	22.7421	16.0698	10.0074	10.1929	6.85098	12.2129	23.7927	19.3954	21.7229	26.4469	16.9509	17.325	19.3392	17.9698	16.9754	12.3867	8.39307	brown
JreChr01G12786	1.24019	1.27887	1.8676	5.05321	3.76832	3.14605	5.59217	9.40747	9.22282	7.01988	10.0155	8.35949	8.56744	8.50461	9.42324	9.52755	8.40356	9.23338	2.02073	2.38879	2.82911	2.40696	2.0713	3.03574	1.46222	3.98919	8.07415	8.46495	8.83176	9.05483	2.41288	2.50467	2.73748	6.44481	7.95293	4.27175	6.83445	3.23128	2.90861	3.24276	2.40137	2.7317	5.23518	4.00107	2.93942	1.73722	1.19952	6.05338	red
JreChr01G12788	0	0.179461	0	0.068453	0.355535	0.063111	0.14325	1.5418	2.23156	0.461311	1.21637	2.00561	2.95895	2.59649	1.72584	7.12392	5.44219	6.96128	33.7701	19.0537	30.1592	16.6515	28.0273	61.5332	0.0598203	0.162366	1.30554	1.22776	2.42709	6.50913	27.661	35.404	12.7267	8.08086	1.62033	0.519711	2.12537	1.77791	1.97885	8.0988	9.16368	0.0655727	0.0984943	0.196471	0.292342	0.066582	0.059114	0.629681	blue
JreChr01G12790	0.03179	0.020127	0.005475	0.034954	0.042246	0.015906	0.140558	0.042121	0.140015	1.03862	0.165579	0.107503	0.238577	1.06041	1.50402	1.28632	0.977594	9.33295	1.21657	6.50523	5.72264	5.87041	5.13313	21.8945	0.0191307	0.0310353	0.107565	0.437236	0.934337	3.86562	4.48148	10.966	2.16108	3.42016	106.526	0.043509	0.0518473	0.737627	0.116436	1.01062	4.15446	0.0285217	0.103294	0.064821	0.0449107	0.070855	0.052176	3.49544	blue
JreChr01G12791	4.50307	4.62115	5.99138	6.45019	6.37803	5.98308	5.83161	3.75536	4.56238	7.87857	6.90227	9.32366	10.0762	7.5119	9.77162	12.6511	12.8346	13.8085	14.1618	14.2654	17.4619	11.7859	12.9693	21.4618	5.03853	6.27043	4.71645	8.03483	9.11991	13.0981	15.2964	15.4057	11.4399	7.04328	13.2515	8.43734	6.0826	7.76904	10.4564	9.56731	8.41644	6.18849	5.22773	4.95415	6.93749	6.10826	5.5465	5.77421	blue
JreChr01G12792	39.6324	36.3127	32.2056	13.0682	16.1046	20.0285	19.3532	15.5185	22.986	3.97136	4.48909	5.88694	6.57668	5.24108	6.31496	4.17787	6.2103	3.68321	4.80083	4.68279	6.34501	7.14265	5.98164	6.64912	36.0502	16.4004	19.2859	4.78246	6.04424	4.69046	5.27621	6.59114	5.79606	9.54327	6.67454	13.8857	20.2293	14.5746	12.1104	7.35892	6.50996	24.2498	16.246	15.2768	13.201	14.7519	32.9623	13.7576	turquoise
JreChr01G12793	8.16764	5.96756	9.98028	8.9248	10.7453	7.76028	20.055	17.4338	23.7942	23.7537	22.7681	24.6774	21.4999	22.7571	24.5903	25.6267	23.409	24.7051	46.8014	28.9132	6.30788	45.8749	55.4884	44.5231	8.03849	9.14347	20.4277	23.7331	22.9491	24.5803	27.3408	48.6288	55.316	43.7137	27.7961	18.2366	16.4765	45.8893	6.19552	5.64861	14.5683	79.8305	45.1051	46.8528	44.0632	115.634	13.8472	20.2042	blue
JreChr01G12797	29.8701	29.7335	28.9856	16.5203	14.8249	14.5564	10.6874	11.039	13.2241	7.74277	10.5275	8.57366	7.42276	8.33502	8.12711	9.336	9.92064	10.1191	14.2712	14.1501	13.7696	22.1722	16.864	13.0727	29.5297	15.3005	11.6502	8.94798	7.96163	9.79193	14.0636	17.3696	12.3165	12.627	12.0787	13.4789	26.1053	15.8627	11.3079	16.0633	21.3726	25.1483	23.4401	18.5943	20.8181	12.7522	29.1733	9.34355	turquoise
JreChr01G12804	5.45021	4.33684	4.47543	0.155957	0.24827	0.201129	0.257927	0.271936	0.210371	0.472235	0.856732	0.270586	0.126817	0.596199	0.532748	0.953273	0.667778	0.994706	1.85958	1.77237	1.95653	2.45449	1.00033	4.01594	4.75416	0.201785	0.246745	0.533184	0.418588	0.871919	1.86283	2.49025	0.569374	0.526387	0.29955	0.303112	3.00748	6.70994	8.01567	10.5473	7.90136	10.7452	10.7038	4.90164	2.80258	3.10022	3.09295	0.229858	turquoise
JreChr01G12809	235.908	242.344	225.886	170.53	169.427	136.5	127.354	142.378	190.949	83.2499	90.6034	90.8492	75.142	75.2409	86.9506	102.736	77.5203	97.2618	35.5998	48.692	26.2551	9.30421	15.9932	30.6609	234.713	158.819	153.56	88.2342	79.1112	92.5061	36.8489	18.6528	42.7025	80.6028	140.493	108.956	52.1016	57.5366	25.8954	46.0139	42.9708	11.3902	25.8206	48.3656	43.3346	42.7869	213.977	134.748	turquoise
JreChr01G12811	5.38299	2.12964	3.67868	0.579879	1.45469	0.582393	0.085186	0.169664	0.27262	0.078197	0.544081	0.156807	0	0.27145	0.025446	0.273808	0.029229	0.18693	0.027998	0.099895	0.279934	0	0.139124	0.07168	3.73044	0.87232	0.175823	0.259695	0.0989653	0.163322	0.135942	0.070268	0.094783	0.37647	0	0.866777	0.703606	0.300352	0.192811	0.0648083	0.0781547	0	0	0	0.0277127	0	4.90776	0.205794	turquoise
JreChr01G12813	25.7484	17.6961	23.0472	11.5293	13.5077	16.442	10.3268	9.25013	11.7138	14.641	15.2124	16.4713	17.0465	17.2369	12.4205	29.2627	25.3932	30.2503	33.1206	17.7855	33.2786	43.6219	42.8758	47.0905	22.1639	13.8263	10.4302	15.4416	15.568	28.3021	28.0616	44.5294	16.2899	17.047	16.3917	18.8071	38.8927	25.9313	21.4894	23.4884	25.6332	18.6821	18.0328	21.4501	16.1695	17.7153	21.5356	9.94372	blue
JreChr01G12819	18.6088	23.0727	19.1888	11.681	9.99011	13.4691	7.64811	7.34677	9.28228	4.13578	1.00616	2.85391	3.48273	3.60851	4.35631	2.037	3.40554	1.84588	0.105456	1.72256	0.278404	0.127323	0.093191	0.080263	20.2901	11.7134	8.09239	2.66528	3.81585	2.42948	0.702141	0.100259	1.71565	1.64033	8.13656	11.3981	9.85394	4.35003	2.39079	3.23472	1.83434	10.5452	10.6724	9.22008	5.49185	5.29021	22.7174	3.0314	turquoise
JreChr01G12820	31.1271	24.5005	29.9018	21.2102	26.9089	30.3412	22.3754	18.7068	20.4454	19.9638	18.3989	17.3934	22.4053	22.3575	23.7009	26.9038	21.7908	24.4591	13.7325	19.2057	12.4538	8.4687	10.1773	12.3982	28.5098	26.1534	20.5092	18.5854	22.8212	24.3846	15.1307	10.3481	12.3494	15.5965	18.0162	30.1225	21.8853	24.2296	20.2126	16.1305	15.2835	16.3727	13.1135	15.468	14.963	12.3769	27.1697	12.9864	yellow
JreChr01G12824	5.06337	3.99751	3.29406	1.40046	1.63278	4.41706	4.31828	2.83013	3.77006	2.21827	1.23757	1.8095	0.998272	1.05402	1.09202	1.16999	1.438	2.47857	4.03635	3.29036	3.50617	3.31894	4.95513	7.21011	4.11831	2.48343	3.63949	1.75511	1.0481	1.69552	3.61096	5.16139	8.64549	3.12577	9.84978	2.11503	6.02688	2.9667	5.37194	6.43112	7.52869	6.11483	5.7367	6.51914	4.82637	3.15932	4.33927	2.15127	brown
JreChr01G12825	5.7462	5.6068	4.93614	2.76844	2.58926	1.58275	0.432061	1.13461	0.502398	0.395323	0.740881	0.194564	0.1812	0.658974	0.792625	0.386766	0.32669	0.52345	0.171016	0.533256	0.172295	0.343086	0.602576	0.129859	5.42971	2.31348	0.68969	0.443589	0.544266	0.412302	0.292189	0.358507	2.48185	2.36362	1.35014	3.17152	4.05234	0.880639	1.10973	2.4589	0.595429	2.21579	1.79121	2.52565	3.42315	3.80254	6.24429	1.33001	turquoise
JreChr01G12829	20.6171	21.2572	15.1759	10.9815	14.2556	9.12374	7.16627	8.36661	6.67138	4.45388	7.18096	4.44262	7.26667	9.85262	8.49165	7.91895	10.1578	12.7965	19.5113	14.1462	15.2785	32.5942	29.5131	36.0348	19.0168	11.4536	7.40142	5.35916	8.53698	10.2911	16.312	32.714	16.3451	15.3356	10.2187	12.9712	11.8075	9.19392	7.44571	12.3768	11.7993	10.9786	12.4657	12.5925	12.2765	7.66691	16.8484	9.4714	blue
JreChr01G12832	4.8349	4.55171	2.72444	0.452272	0.528917	0.699184	0.628568	0.056467	0.133037	0	0	0	0.071972	0.211291	0.063976	0.425646	0	0.062035	0	0.243889	0.058865	0	0.128722	0	4.03702	0.560124	0.272691	0	0.115746	0.16256	0.100918	0.0429073	0.119851	0.475109	0	1.12231	2.09954	6.07156	3.67591	10.628	9.74075	5.91311	10.2278	17.3181	12.0717	7.7815	4.13094	0	turquoise
JreChr01G12834	115.024	97.3496	72.7462	1.34099	2.1381	5.40961	0.004257	0.405942	0.366823	0.041956	0.003258	0.003037	0.003268	0.004611	0.008213	0.013388	0.008153	0.002459	2.90346	1.97637	2.65001	3.39279	7.96147	1.99935	95.0399	2.9629	0.259007	0.0160837	0.005364	0.008	2.50995	4.4512	8.04341	1.52347	0.000886	0.751528	142.583	15.011	1.58809	2.14057	3.35651	80.6483	56.7723	42.8454	20.4747	22.2397	67.0645	0.005086	turquoise
JreChr01G12835	3.33212	5.52723	9.19807	45.8608	56.8774	54.9723	51.7153	59.2893	76.9497	70.06	73.8443	72.8657	41.4991	42.4465	43.0098	23.1792	35.3662	25.1228	14.911	17.4604	16.8822	42.5348	38.4389	34.8545	6.01914	52.5702	62.6514	72.2567	42.3184	27.8894	16.4178	38.6094	66.0266	81.7509	81.7426	77.16	14.2178	42.943	60.4076	31.8886	14.7532	44.8869	16.6695	9.60098	14.9927	9.21946	12.3666	66.496	red
JreChr01G12836	1.87089	4.72927	6.40344	3.74833	5.94176	2.45313	11.7711	12.8324	14.4475	8.22268	6.55746	6.4271	4.6393	1.73232	4.27313	9.27772	8.91409	3.32141	2.91804	2.19454	2.40049	1.40856	2.57284	1.75277	4.33453	4.04774	13.017	7.06908	3.54825	7.17107	2.50436	1.91139	1.14117	8.74533	6.31647	12.397	2.58016	2.17779	1.72385	11.8077	1.43006	1.25315	1.11649	1.63984	5.51284	1.37008	9.33324	10.4695	red
JreChr01G12838	1.24429	1.30799	1.138	0.214102	13.7809	5.46927	0.752821	1.03265	0.057569	45.4165	34.8302	46.3079	52.7007	33.6504	38.106	50.1116	1.61465	46.253	74.3436	83.337	68.8873	0.07684	10.7313	73.2502	1.23009	6.48807	0.614345	42.1849	41.4857	32.6597	75.5226	28.0195	1.77458	1.32322	1.16161	89.484	17.3886	17.4533	45.8406	30.369	22.9463	23.5655	1.22716	38.1618	32.6251	28.0287	7.92396	25.3855	green
JreChr01G12839	15.7874	12.1377	11.5162	4.12539	4.22439	5.08067	2.9958	2.90585	3.55497	1.97358	2.41811	2.30652	2.7059	2.95815	2.01546	2.20488	1.51215	1.55846	1.00902	1.11053	0.823851	0.342583	1.178	2.09216	13.1471	4.47681	3.15221	2.23274	2.55984	1.7585	0.981136	1.20425	1.49959	1.82355	1.45203	2.3379	21.9155	16.461	19.3058	15.5882	7.51119	10.2562	11.4587	13.6671	14.6951	18.2728	13.7904	0.932663	turquoise
JreChr01G12843	1.90076	1.48153	0.994549	0.922628	1.10103	0.654513	4.29267	3.8743	4.14907	5.94369	6.53985	8.57332	8.03288	5.37583	5.78848	6.0565	6.90336	8.12811	4.43647	5.10573	4.29505	2.82194	3.44033	6.33367	1.45894	0.892725	4.10535	7.01895	6.39906	7.02932	4.61242	4.19865	3.14889	3.50519	4.97925	3.71604	4.9814	7.64652	8.11785	7.38944	6.49051	8.52752	6.69958	8.05166	8.47755	5.79013	1.27743	5.22001	green
JreChr01G12845	27.6123	27.3737	25.0797	1.11442	1.05662	1.16768	4.20464	4.35391	2.59326	4.6618	1.63864	1.35252	1.39184	1.46365	0.722593	2.20978	1.22509	2.69423	0.845234	0.62119	0.241391	0.081086	0.413186	0.66209	26.6886	1.11291	3.71727	2.55099	1.1927	2.04303	0.569272	0.385454	0.93876	0.655801	0	1.25009	1.21173	1.25634	0.20226	0.569641	0.161915	0.422629	0.327369	0.535155	0.468392	0.436846	22.9043	0.714569	turquoise
JreChr01G12850	36.3679	24.3915	25.2504	15.8196	10.5872	17.7135	9.34677	9.19556	14.585	7.28934	6.87463	9.875	8.19945	9.54094	10.536	9.53707	15.2369	15.7264	12.9455	10.8975	11.8095	8.48982	4.41603	11.9858	28.67	14.7068	11.0424	8.01299	9.42547	13.5001	11.8841	8.29722	8.34581	9.50715	12.2913	17.7059	32.7152	9.15737	13.1721	11.6641	8.71308	17.6557	10.8125	11.4025	11.9813	13.1745	21.9413	7.06576	turquoise
JreChr01G12852	4.511	4.03998	4.37433	3.54299	3.83472	2.89499	8.74693	5.68448	7.10283	5.83812	5.82898	5.40065	6.74858	6.21006	6.06578	15.274	11.9139	15.6607	12.103	10.2631	11.8523	13.8434	13.2592	16.8322	4.30844	3.42423	7.17808	5.68925	6.34148	14.2829	11.4061	14.6449	9.51934	8.20864	11.2054	5.46224	12.1765	21.8088	25.5017	31.0593	36.0239	26.2728	21.4768	22.7165	27.7446	26.1997	4.35333	7.59262	blue
JreChr01G12863	4.35645	4.68411	3.47001	8.27509	15.2346	19.8015	6.75256	7.30568	6.90157	8.44219	9.40618	11.2969	9.02089	9.12778	10.6291	11.6438	9.58957	9.27272	13.8714	9.54708	15.5015	10.6803	13.5225	15.8643	4.17019	14.4371	6.9866	9.71508	9.59259	10.1687	12.9733	13.3557	8.99262	11.4924	8.04551	12.3959	24.6223	8.5981	26.5944	17.4985	14.9028	10.732	12.8747	19.2785	16.4954	6.38483	15.324	6.83019	green
JreChr01G12866	4.05353	2.54598	1.42136	0.098735	0.008629	0.421761	0.540777	0.00299	0.007793	0.056684	0.007261	0.003153	0.016838	0.002584	0.003314	0.052089	0.001299	0.006328	0.00591	0.00122	0.000177	0.008011	0.003201	0	2.67362	0.176375	0.183853	0.022366	0.00757867	0.0199053	0.00243567	0.00373733	0.003508	0.004321	0.004987	0.006049	4.40741	2.00144	3.4009	1.61527	0.19323	1.93604	1.77337	1.17573	0.981691	1.24255	2.33433	0.00247667	turquoise
JreChr01G12873	0.717672	1.12429	2.4798	8.22311	1.78813	2.10154	10.0499	9.72776	10.9211	10.2896	10.3436	11.4035	2.30896	1.25025	10.9302	3.56167	2.87971	2.50945	17.8285	4.19937	3.28043	3.98716	4.17219	5.31874	1.44059	4.03759	10.2329	10.6789	4.82979	2.98361	8.43611	4.4927	21.269	20.6167	2.6952	2.76441	4.29875	4.50429	5.02329	8.59468	4.84754	4.2021	12.5658	11.0593	10.8975	12.0246	3.42093	10.4839
JreChr01G12875	35.6422	47.9743	52.9395	19.7288	20.0528	19.5812	24.8487	22.3809	22.0582	14.9663	18.5356	13.5983	15.2904	16.2504	14.3005	15.417	11.8133	15.8057	31.9893	23.7227	35.3797	44.4298	53.5789	29.1422	45.5186	19.7876	23.0959	15.7	15.2804	14.3453	30.3639	42.3836	62.5145	56.9364	20.2739	21.9394	45.1975	34.8342	38.6313	28.6948	32.9536	24.0724	28.5487	23.0705	22.1032	15.8332	24.0775	15.6152	brown
JreChr01G12877	5.78522	4.61722	5.64148	0.668493	0.437291	1.30619	0.304394	0.074996	0.277151	0	0	0	0	0	0.005062	0.16831	0.012165	0	0.00437	0.019023	0.097342	0.007203	0.00429	0	5.34797	0.80399	0.218847	0	0.00168733	0.0601583	0.040245	0.003831	0.346172	0.004838	0.026389	0.065383	9.46616	1.41013	0.225993	0.314245	0.008699	15.9227	9.99676	4.12375	0.886378	0.880808	6.27606	0.0150707	turquoise
JreChr01G12882	0.622497	0.754889	0.440839	22.0505	1.01042	35.3655	20.7705	24.8558	21.8821	10.9524	12.7034	10.5386	20.3508	17.4913	16.0158	21.4369	18.1781	19.9364	1.6807	18.9349	26.4134	27.8095	34.3776	41.635	0.606075	19.4755	22.5028	11.3982	17.9526	19.8504	15.6763	34.6073	43.8468	28.4811	24.3116	25.4096	60.7622	22.7198	30.1748	32.4779	13.0752	33.1362	45.2862	41.8347	20.1648	46.4088	18.3161	24.4217	green
JreChr01G12885	3.66159	18.4477	15.1598	12.9375	9.62782	8.77787	12.9098	13.1425	9.5006	7.76101	13.1409	11.4652	11.2088	13.7259	8.09164	22.0405	12.9175	15.7216	30.5457	29.5	27.8626	59.9461	19.4472	55.8102	12.423	10.4477	11.851	10.789	11.0088	16.8932	29.3027	45.0678	58.4348	31.245	11.5326	11.3713	17.0477	32.7812	46.7923	37.2473	38.759	27.4088	44.0124	29.6321	43.2622	46.583	11.5168	12.3206	blue
JreChr01G12889	9.74201	3.22968	3.85645	1.38125	0.637135	0.916285	1.3043	0.36123	0.453979	0.579268	0.92451	0.07979	1.06255	1.83567	1.57431	5.30596	3.76029	6.73199	16.4785	12.2496	9.77078	7.77135	11.9407	17.7899	5.60938	0.978224	0.706504	0.527856	1.49084	5.26608	12.833	12.5007	2.64809	3.17047	2.76579	1.07325	15.3377	98.7766	22.0608	109.882	157.199	34.1292	81.8436	76.1205	178.957	132.076	5.06258	0.818768	blue
JreChr01G12891	12.701	6.8076	4.01242	0.205876	0.04575	0.106171	0.201548	0.220564	0.102318	0.233891	0.442694	0.341622	0.06785	0.12217	0.059709	0.150171	0.031869	0.058483	0.14602	0.11753	0.061228	0.085893	0.178891	0.039077	7.84033	0.119266	0.17481	0.339402	0.083243	0.0801743	0.108259	0.101287	1.55817	0.259142	0.239886	0.116482	2.16298	1.91918	1.19409	2.42691	10.4167	10.0892	19.6946	20.3142	16.008	15.0578	14.1159	0.0925237	turquoise
JreChr01G12898	9.9088	11.3812	12.9827	10.3281	2.9265	11.8371	6.83993	6.96862	4.20036	1.37435	0.102252	1.83644	2.53589	1.32364	1.50193	2.96667	2.54671	3.22831	4.06452	3.37261	3.80393	4.77219	5.73998	3.13091	11.4242	8.36389	6.00297	1.10435	1.78715	2.9139	3.74702	4.54769	3.67701	6.55817	4.29849	4.45484	2.44844	2.29921	1.2992	1.91178	3.60531	2.08078	3.56319	2.49804	2.09146	1.13317	10.2067	2.21356	turquoise
JreChr01G12900	17.6523	16.8291	19.7025	8.2983	11.1674	8.16149	4.83168	5.43981	4.60851	9.97451	9.07008	9.00363	5.86283	5.68409	6.29045	5.96445	4.52081	6.12318	3.13555	5.67979	2.33862	2.58543	2.67749	1.19799	18.0613	9.20905	4.96	9.3494	5.94579	5.53615	3.71799	2.15364	12.0775	10.5112	5.00868	8.01912	43.7895	6.08819	4.06658	3.08958	3.20637	19.7706	22.051	10.9162	6.99551	2.72653	16.7926	4.82851	turquoise
JreChr01G12901	69.8876	63.8722	45.7565	3.61536	4.39997	6.63431	0.843335	0.836376	1.73402	2.85523	1.02192	0.582473	1.54068	3.11802	0.969251	7.65296	5.72339	9.56184	17.7901	9.07548	14.2739	21.4993	16.7372	27.0852	59.8388	4.88321	1.13791	1.48654	1.87598	7.64606	13.7132	21.7739	32.9724	20.0896	5.68746	2.41777	105.142	11.3289	3.9843	4.72376	8.29785	46.9939	33.0268	26.8608	14.5022	8.92713	49.1699	0.741662	turquoise
JreChr01G12915	16.8337	7.61336	6.76599	4.07286	4.18281	5.32409	20.8555	8.61122	1.61379	1.1458	0.849289	1.0367	0.950043	0.986286	1.70441	1.48934	0.939258	1.45827	1.1264	2.2131	1.29294	0.613676	0.568748	0.159404	10.4044	4.52659	10.3602	1.0106	1.21358	1.29562	1.54415	0.447276	3.21344	1.10864	2.28245	3.41164	10.1109	4.05844	9.01717	17.4182	11.6314	29.2467	36.4546	36.4045	49.8669	32.8169	9.18088	1.1457	turquoise
JreChr01G12916	24.6877	10.5035	10.3384	47.1123	59.2257	37.1951	23.155	32.3335	21.1241	48.7488	28.3145	45.0125	46.8154	47.7585	70.4546	46.2991	56.1022	50.433	131.813	64.4002	79.3352	68.9831	59.6374	123.613	15.1765	47.8444	25.5375	40.6919	55.0095	50.9448	91.8496	84.078	37.9878	40.1621	73.3011	49.2945	6.65948	20.5677	16.5415	29.2479	79.6945	0.212218	2.28897	1.28197	4.10669	4.7416	15.8334	41.7657	blue
JreChr01G12917	76.456	75.7315	84.1668	29.8844	49.6789	8.04229	23.3926	18.3623	26.1823	13.9534	8.04326	9.94395	8.01425	11.4043	15.3223	21.0542	11.3244	16.4488	6.79899	8.95189	4.85572	5.72363	4.80819	4.26889	78.7848	29.2018	22.6458	10.6469	11.5803	16.2758	6.86886	4.93357	51.2185	33.1079	16.1582	5.60747	159.629	45.5631	21.3741	3.12695	2.04889	74.2611	90.9597	75.1047	63.198	67.6527	61.7756	14.9639	turquoise
JreChr01G12920	22.8552	22.9196	17.1781	5.90288	6.30821	10.7383	7.19161	9.72276	6.18482	6.38884	5.85388	6.5166	3.48456	6.1524	6.05687	5.6506	5.09813	4.07806	9.74287	12.8885	14.4545	11.0942	12.0666	6.87736	20.9843	7.64979	7.69973	6.25311	5.23128	4.94226	12.362	10.0127	12.2799	17.1312	12.4915	9.04439	8.97899	15.7757	25.9731	13.8612	15.0494	8.38832	7.84356	7.72208	6.89621	11.5966	25.5985	3.75299	turquoise
JreChr01G12923	0	0	0	0	0	0	0.080852	0	0.125973	0.325035	0.355043	0.216385	0.707847	0.032012	0.171205	0.583686	0.58768	0.113175	3.06169	2.35478	2.8393	3.46041	4.674	5.29189	0	0	0.0689417	0.298821	0.303688	0.42818	2.75192	4.47543	5.15944	3.14357	0.299152	0	0.048334	0.0773477	0.556964	0.193475	0.545996	0.361845	0.134314	0	0.417725	0.0448543	0	0.270002	blue
JreChr01G12925	13.2515	0.340304	6.3151	0.022075	0.473885	0.340648	6.6033	6.4824	4.73395	3.98076	5.10492	4.57093	2.9939	4.65189	5.78674	11.1613	7.49619	10.9634	7.97993	6.56984	9.36311	8.70238	0.717043	0.908523	6.63562	0.278869	5.93989	4.55221	4.47751	9.87366	7.97096	3.44265	7.19482	0.316764	4.80612	7.46469	17.5979	4.25699	8.587	9.61998	9.59267	12.9551	14.5258	19.4621	16.9646	10.6765	4.07987	2.07179
JreChr01G12934	1.63561	1.2666	0.680762	0.55725	0.647935	0.321502	0.096	0.754833	0.103645	0.550427	0.479921	0.710419	0.264911	0.70503	0.047924	0.422434	0.577819	0.349296	7.02564	2.27856	8.13327	16.1975	9.02715	10.3048	1.19432	0.508896	0.318159	0.580256	0.339288	0.44985	5.81249	11.8432	3.05356	1.79153	0.221747	0.578038	9.34124	5.41224	3.83609	3.22096	6.49201	2.1862	0.936574	0.744626	0.855724	0.389872	1.08702	0.450003	blue
JreChr01G12969	5.21845	3.05128	8.08348	1.52478	0.908399	3.81649	1.71367	1.50745	0.824993	2.12633	0.17021	2.59349	0.245077	0.430544	0.238977	1.89311	0.767655	0.185227	2.21766	0.161008	1.82729	1.74244	1.14788	0.260603	5.45107	2.08322	1.3487	1.63001	0.304866	0.948663	1.40199	1.05031	5.24989	2.6988	0.482723	0.999956	1.82801	0.503494	0.86602	0.199305	0.815478	0.331091	0.22069	0.279916	0.653189	0.318574	4.05743	1.10861	turquoise
JreChr01G12970	54.1166	44.8262	54.1754	51.4759	2.77104	42.2171	28.3566	29.9993	23.2852	20.4559	23.6039	24.4374	16.3053	26.7052	24.5859	42.3627	27.5055	46.8131	39.9126	38.3631	39.2427	31.7395	30.4443	26.2569	51.0394	32.1547	27.2137	22.8324	22.5322	38.8938	39.1728	29.4802	24.7213	36.4498	31.7695	39.1028	29.9519	23.0762	27.3734	30.6523	33.209	20.6924	23.8972	22.7325	20.7868	10.155	52.6579	21.8606	turquoise
JreChr01G12973	24.0409	21.7085	18.6657	11.5498	17.1059	12.1216	13.3302	10.3366	8.92023	7.94797	7.00641	6.37753	7.79954	6.50421	5.09081	9.93338	8.29719	8.61079	21.9732	19.0695	22.8226	46.5097	43.1794	35.0451	21.4717	13.5924	10.8623	7.11063	6.46486	8.94712	21.2884	41.5781	27.2484	30.4974	11.7742	14.1993	19.3538	31.7092	19.4472	30.4981	30.8339	37.0331	44.7569	51.2726	40.1657	35.3373	24.6066	10.3331	blue
JreChr01G12975	6.64897	5.09432	2.77497	0.000938	0.002368	0.478296	0.002019	0.000305	0.023959	0	0.069059	0.000873	0.009433	0.001889	0.002634	0.006847	0	0	0	0	0.020483	0	9.6e-05	0.000761	4.83942	0.160534	0.008761	0.0233107	0.004652	0.00228233	0.00682767	0.000285667	0.001502	0	0.001613	0.003678	1.57124	0.169424	0.00572967	0.0164143	0.00250033	0.247183	0.145274	0.204076	0.309732	0.0528497	2.6456	0.0137207	turquoise
JreChr01G12976	2.20979	3.26453	2.87744	0.004347	0	0.463936	0.207713	0.017037	0.420477	0	0	0.026401	0	0	0.006934	0.001825	0.204167	0	0	0	0	0	0.003455	0.047198	2.78392	0.156094	0.215076	0.00880033	0.00231133	0.068664	0	0.0168843	0.015585	0.016548	0.018219	0	1.92605	0.457564	0.0254737	0.0289413	0.0254507	0.0247187	0.0161117	0.025569	0.248092	0.225257	2.13532	0.024896	turquoise
JreChr01G12977	81.4061	90.1861	92.2326	57.1657	55.4323	51.2373	59.3266	53.0397	57.2602	28.9052	30.9115	31.3079	52.8997	6.72379	47.8471	60.5502	57.0429	51.8566	23.8801	27.3422	23.1482	12.5517	14.5325	19.1627	87.9416	54.6118	56.5421	30.3749	35.8236	56.4833	24.7901	15.4157	25.6132	36.0359	44.2154	43.724	11.5993	15.6852	7.11666	8.80497	7.70801	1.98033	2.23388	7.51612	3.76256	2.40285	75.6252	34.3217	turquoise
JreChr01G12982	50.4273	53.2164	53.9036	31.0927	27.0903	35.2184	23.3499	22.7274	36.1846	23.3077	20.3211	22.9458	24.9943	24.6648	26.0917	41.4569	32.3442	44.9901	25.3806	20.3752	26.1608	21.9338	28.8888	34.1727	52.5158	31.1338	27.4206	22.1915	25.2503	39.5971	23.9722	28.3318	16.7331	20.0965	22.5792	30.0469	30.9489	20.5689	19.7729	26.1214	22.3059	31.6949	30.1496	37.0158	27.6091	21.5125	32.4954	20.3285	turquoise
JreChr01G12983	8.27587	6.88328	5.60091	2.65517	2.04924	3.1161	3.11128	1.94312	1.97145	3.67609	3.00237	2.55953	2.44764	1.86442	1.842	2.32612	2.92475	3.72397	2.20248	3.02659	2.38898	2.27314	0.990015	1.16327	6.92002	2.60684	2.34195	3.07933	2.05135	2.99161	2.53935	1.47548	0.052474	2.40826	1.26273	3.54491	4.20413	2.33552	3.97214	3.63833	2.09707	3.45772	3.40748	3.97624	3.17522	2.24128	7.37295	1.83782	turquoise
JreChr01G12992	13.6513	20.6504	15.8063	2.71679	5.5764	1.1994	1.96505	0.827207	3.61181	2.03676	2.72616	1.37814	2.33606	1.51986	1.91642	2.70276	2.12203	3.09219	1.30822	1.62844	0.981276	2.1001	1.30844	2.67534	16.7027	3.1642	2.13469	2.04702	1.92411	2.63899	1.30598	2.02796	1.639	2.02615	1.67842	3.22789	11.0543	4.74264	2.32689	6.32391	4.82129	9.10531	9.26474	9.25943	9.09414	4.73684	11.6699	2.7981	turquoise
JreChr01G12998	42.4807	37.8186	33.0725	17.4799	12.4944	18.3363	13.9175	20.2764	11.774	9.62514	7.4149	9.20769	8.76982	9.15045	9.49178	13.9688	11.4944	11.8388	9.01891	9.43625	10.8327	11.3332	10.2818	19.1213	37.7906	16.1035	15.3226	8.74924	9.13735	12.434	9.76261	13.5788	8.21276	8.19237	8.58886	13.3134	51.7847	35.3188	31.2802	32.8441	24.8355	38.923	35.4099	35.0382	29.8424	33.4572	41.7207	7.20453	turquoise
JreChr01G13008	110.039	42.7456	51.1247	35.3907	41.1807	26.4227	38.4919	22.2965	0.387792	8.22017	132.52	129.549	134.028	106.714	118.715	6.84237	87.3817	157.025	0.221854	139.528	80.5246	197.26	232.235	159.603	67.9698	34.3314	20.392	90.0963	119.819	83.7497	73.4248	196.366	85.3195	102.873	446.431	57.5312	35.1236	67.7375	90.69	68.9811	48.0058	43.9935	24.926	24.121	23.4822	51.8999	42.0893	70.589	blue
JreChr01G13010	96.3165	86.2376	85.1383	41.9752	46.2219	41.1036	12.724	10.9784	15.0573	27.6544	17.3201	17.9007	14.9828	15.4854	18.3075	19.0646	14.2945	6.30611	8.21268	10.7457	6.37149	5.58296	6.49676	10.3064	89.2308	43.1002	12.9199	20.9584	16.2586	13.2217	8.44329	7.46204	8.24111	7.50206	51.8526	30.1662	20.6371	4.96746	3.083	2.13781	2.99904	5.54895	2.81968	4.82146	2.68348	2.04165	77.1991	14.4462	turquoise
JreChr01G13013	6.71582	5.29974	5.2027	1.2944	1.28338	0.741076	0.883484	0.935179	0.884333	0.473085	0.66698	1.04875	0.768199	0.553016	0.425761	1.36488	0.828228	1.2232	1.27634	0.81685	1.70423	1.26876	1.42154	2.35916	5.73942	1.10629	0.900999	0.729604	0.582325	1.13877	1.26581	1.68316	2.52959	0.67563	0.518768	0.720354	4.17243	2.46347	2.0377	2.63227	2.81164	3.24353	3.99419	5.00482	2.94475	3.07428	5.17128	0.572258	turquoise
JreChr01G13014	42.5313	31.5775	31.9421	20.0333	16.2174	13.8118	11.1362	14.439	9.51229	9.1135	10.4844	9.15969	9.02696	7.48751	7.69046	14.0685	9.75261	12.7036	10.325	10.778	11.3008	13.2242	11.5672	6.57732	35.3503	16.6875	11.6958	9.58587	8.06831	12.1749	10.8013	10.4562	12.5044	20.5753	9.45199	13.5713	55.5615	57.9682	47.923	60.2363	57.4808	59.2762	66.3946	99.4391	104.118	95.0931	37.8547	8.40137	turquoise
JreChr01G13016	143.32	115.948	108.036	75.5654	86.5226	130.106	57.2736	55.6176	49.8415	41.1617	33.6437	43.6731	48.6796	52.5724	44.9527	66.6206	66.0565	42.2611	67.7182	64.0143	65.9399	36.297	45.984	51.7892	122.435	97.398	54.2442	39.4928	48.7349	58.3127	65.8908	44.6901	40.4773	42.3066	54.5773	61.7774	60.67	76.7152	91.1923	74.197	86.469	99.8893	127.809	139.943	134.446	134.902	134.166	28.4403	turquoise
JreChr01G13021	164.413	187.61	159.051	95.6487	85.0167	103.009	61.9953	49.0336	70.7495	29.0182	24.4518	21.7322	18.1867	24.0073	23.9515	31.3647	27.0081	32.8184	18.5898	23.0665	21.0436	19.0205	24.2498	24.7218	170.358	94.5583	60.5928	25.0674	22.0485	30.3971	20.9	22.664	30.8713	34.2614	28.4291	54.6899	78.5642	55.2227	36.3563	37.0623	39.6297	79.8612	53.2233	48.7761	26.6235	26.6495	158.789	34.8427	turquoise
JreChr01G13035	172.427	135.752	81.7113	7.61401	9.04759	10.1286	3.92016	6.84333	4.9662	5.56244	4.32826	6.66316	5.16243	3.98477	3.89091	7.74784	5.74365	8.25621	17.7396	10.1076	22.3977	19.1881	20.8639	24.086	129.964	8.93006	5.24323	5.51796	4.34604	7.24923	16.7483	21.3793	19.8517	8.89559	0.289587	9.08557	69.2576	26.4433	23.7527	14.9317	30.4925	19.0225	18.5336	27.9307	13.9906	7.82855	129.224	5.19203	turquoise
JreChr01G13036	16.3625	10.424	10.5068	7.39588	9.68961	9.63203	4.74312	3.48184	3.43173	5.53714	7.19113	9.40244	4.54584	6.12775	6.39811	8.3881	6.39556	9.27954	15.2662	10.2153	13.5557	17.8873	14.514	14.9985	12.4311	8.90584	3.88557	7.3769	5.69057	8.02107	13.0124	15.7999	12.036	9.13992	8.05956	11.676	14.824	14.9498	8.73061	11.2301	15.4764	15.1279	16.6328	18.2167	16.2266	16.6378	15.0512	4.4891	blue
JreChr01G13043	10.2502	6.83854	10.0357	8.47581	19.3467	7.67465	3.65448	4.35618	19.9912	15.1849	15.8257	16.2429	11.8737	14.9873	12.6677	10.2097	13.0175	13.0098	38.4768	24.933	28.2863	68.6481	52.778	29.9998	9.0415	11.8324	9.33397	15.7512	13.1762	12.079	30.5653	50.4753	57.4395	46.9412	21.7366	17.1879	10.9342	9.20538	17.1402	26.0156	37.3648	10.5969	14.2197	10.8887	14.1396	11.4821	7.85271	11.7171	blue
JreChr01G13044	2.83273	2.98656	3.66167	8.20619	7.01762	4.28252	9.20513	11.9881	17.6004	12.5082	9.93708	13.3133	16.261	15.801	12.7087	18.0698	15.4015	18.2998	20.6503	14.5901	20.3378	28.4542	28.7454	33.5476	3.16032	6.50211	12.9312	11.9195	14.9236	17.257	18.5261	30.2491	18.3398	18.9499	9.04876	15.5654	1.70984	5.61403	15.6491	20.4172	24.5918	0.0489803	0.083637	0.576883	0.123199	0.157126	3.04884	14.8887	blue
JreChr01G13050	15.4235	7.07259	6.85273	0.629709	0.608592	1.61599	0.053356	0.001208	0.527072	0.013613	0.001778	0.002019	0.001051	0.434786	0.001997	0.070687	0.031117	0.001077	0.362998	0.318419	0.246809	0.322784	0.5231	0.451951	9.78294	0.95143	0.193879	0.00580333	0.145945	0.0342937	0.309409	0.432612	0.00287	0.00047	0.001694	0.001176	2.97794	0.802658	1.21326	0.418246	0.387356	0.725129	1.379	1.16428	1.09572	0.874706	6.89804	0.00461667	turquoise
JreChr01G13069	10.2903	8.62588	9.37436	23.7546	19.1895	19.5197	15.8883	17.7106	19.8929	7.05152	6.58786	7.46795	9.19593	7.92653	9.57236	10.606	8.83079	9.92671	3.68471	5.24093	6.66126	2.45481	2.90488	4.22676	9.43019	20.8213	17.8306	7.03578	8.89827	9.78784	5.19563	3.19549	5.08267	11.0322	9.87158	12.6045	12.974	11.9277	9.69069	11.6107	7.96169	15.8474	22.4065	16.3334	17.6116	16.359	10.9266	10.3384	yellow
JreChr01G13070	10.5736	8.96045	15.1546	200.145	184.759	165.958	195.279	257.572	82.9807	149.83	130.565	175.65	326.535	308.106	220.576	485.552	327.885	436.192	1183.18	1148.46	1157.4	1066.05	907.404	993.741	11.5629	183.621	178.61	152.015	285.072	416.543	1163.01	989.064	426.811	847.038	394.088	158.366	0.104419	20.0607	58.3098	109.444	352.053	0.282635	0.877072	1.36902	2.47361	1.36861	17.1237	211.261	blue
JreChr01G13075	38.4841	22.9548	31.6802	7.79217	6.67398	8.27953	20.4935	16.4131	14.792	11.4581	17.9522	14.8702	29.7828	31.1199	21.7594	80.5085	59.4318	73.5929	47.5703	40.1213	39.8854	28.2003	33.4587	47.658	31.0397	7.58189	17.2329	14.7602	27.554	71.1777	42.5257	36.439	32.8953	26.4357	18.7557	10.9319	33.5516	147.918	79.2325	128.887	287.798	4.87798	1.99192	2.6536	4.35864	2.23409	37.8461	14.265	blue
JreChr01G13087	12.183	8.44597	8.7262	5.69897	6.57453	8.19805	2.2936	6.20641	9.52722	3.05202	2.50011	3.23485	3.20768	3.44324	3.55657	7.29535	5.84143	8.4675	6.68104	6.71983	10.1164	22.5025	9.55925	13.997	9.78507	6.82385	6.00908	2.92899	3.4025	7.20142	7.83908	15.3529	9.64173	6.46846	4.98079	8.25629	13.0511	7.80202	6.24428	8.10579	8.4993	13.6364	14.6984	14.1828	12.0209	11.9726	10.0933	4.42043	brown
JreChr01G13092	20.2873	19.2472	19.7624	13.7848	12.9557	13.6996	11.9128	5.62768	12.2559	7.67278	6.91951	7.80806	7.55449	8.42658	10.5872	15.3084	8.68959	12.0097	13.5055	12.8021	14.8528	15.1781	11.8737	23.5878	19.7656	13.48	9.93212	7.46678	8.8561	12.0026	13.7201	16.8799	12.7351	12.7351	10.2175	12.7044	29.4658	35.4621	41.3409	43.3038	41.6018	40.7774	30.7159	42.9019	44.6804	39.7099	21.3898	8.9887	brown
JreChr01G13097	14.3881	11.044	12.8505	6.63582	9.3549	7.84054	6.64408	5.68979	5.21348	6.16669	5.84005	6.73258	4.51144	1.78827	4.46528	4.85482	3.90723	6.09808	7.34395	6.41128	6.35488	11.0954	12.2106	16.5574	12.7609	7.94375	5.84912	6.24644	3.58833	4.95338	6.70337	13.2878	9.72934	5.33204	3.20241	3.22242	10.4102	13.4201	20.4811	19.4582	15.8987	6.74725	5.09471	7.72239	8.492	7.02493	13.6888	4.46989	brown
JreChr01G13105	8.94054	8.97747	9.95631	4.66858	8.95708	9.91574	8.10291	4.69103	7.76603	7.53901	8.24503	7.9454	7.02133	6.13655	5.2861	8.54019	7.40147	7.37756	11.9352	13.3079	19.6985	29.0115	25.5383	17.7453	9.29144	7.84713	6.85332	7.90981	6.14799	7.77307	14.9805	24.0984	7.25275	13.5983	6.57271	13.2434	3.4513	4.8492	5.67635	5.4933	9.81061	3.25446	3.35329	3.1233	2.93768	2.51767	6.51608	6.88477	blue
JreChr01G13118	65.6664	70.9882	65.7364	0.079216	33.3565	39.7528	20.5285	23.9569	18.0018	26.5325	21.623	22.4573	21.6457	26.4002	25.1481	29.6922	21.7138	21.7951	20.4536	20.7729	0.076773	22.6045	22.14	32.6848	67.4636	24.3962	20.8291	23.5376	24.398	24.4004	13.7678	25.8098	20.402	23.0293	0.095085	37.8087	14.179	26.6052	14.896	14.4927	16.4819	30.4691	25.6846	25.6757	7.31772	12.9517	22.7826	7.33037	turquoise
JreChr01G13121	1.96323	3.61772	3.7828	0.296812	0.023777	0.586591	0.019263	0.317835	0.517085	0.061391	0.235276	0.145344	0.002992	0.128275	0.064817	0.248614	0.169049	0.281363	0.245859	0.214946	0.458088	0.267716	0.334381	0.224538	3.12125	0.302393	0.284728	0.147337	0.0653613	0.233009	0.306298	0.275545	0.260445	0.027587	0.018066	0.042705	0.165285	0.228864	0.334357	0.343432	1.00935	0.082973	0.0971763	0.157721	0.182549	0.135544	1.47358	0.0609767	turquoise
JreChr01G13122	13.1949	8.18771	11.6224	16.8553	2.58064	0.075571	14.8216	18.3944	12.457	11.1953	7.73299	2.11238	16.2633	1.60396	21.2251	0.06419	0.131913	3.82459	15.7356	1.80248	13.8302	9.30003	7.86567	7.12156	11.0016	6.50383	15.2243	7.01357	13.0308	1.34023	10.4561	8.09575	8.20791	7.00803	0.105829	2.30429	7.6024	9.59972	18.4017	11.5442	8.54155	2.52957	4.8278	6.60867	6.30336	7.90406	8.44594	13.2635
JreChr01G13125	12.5257	11.7584	14.0882	5.61251	5.42652	6.77352	6.44686	4.13205	4.1403	2.64772	3.63044	3.36862	3.3355	2.17541	2.44238	5.09558	5.69539	6.6773	6.23938	3.71231	4.25755	6.21161	6.00661	6.6698	12.7908	5.93752	4.9064	3.21559	2.6511	5.82276	4.73641	6.29601	3.46813	4.56814	2.69502	4.16777	6.47083	14.064	17.1114	14.8496	10.1312	10.3597	10.1329	9.37787	9.26503	10.8501	11.7092	4.09532	turquoise
JreChr01G13131	2.56886	3.40995	2.63113	2.49298	2.37533	2.65156	3.79205	3.10378	3.77692	0.117534	0.491126	0.431095	0.550564	0.390322	0.529017	0.037668	0.321031	0.13208	0	0	0	0	0	0	2.86998	2.50662	3.55759	0.346585	0.489968	0.163593	0	0	0.717489	0.657846	0.500246	1.1296	1.86039	0.159469	0.132568	0	0	0.317316	0.339275	0.195632	0.0179723	0.058033	2.60639	1.42746	yellow
JreChr01G13134	15.1542	17.5701	13.4163	0.752449	2.02289	1.69739	1.23132	1.34697	1.0632	2.30552	1.47356	1.82661	0.685105	1.4192	1.13867	1.9902	1.53072	2.1373	0.892604	0.985285	0.986425	0.526985	0.543042	0.523797	15.3802	1.49091	1.21383	1.86856	1.08099	1.88607	0.954771	0.531275	2.68343	0.006276	0.515996	0.461435	1.94322	0.453718	0.104615	0.211852	0.092962	0.357059	0.142801	0.383147	0.217144	0.0119853	11.1637	0.523001	turquoise
JreChr01G13138	7.7782	5.36498	4.89461	0.003701	0.436422	0.184749	0.110214	0.00244	0.440926	0.164954	0.004233	0.166239	0.218975	0.19152	0.002272	0.290091	0.004934	0.566141	0	0	0	0	0	0	6.0126	0.208291	0.184527	0.111809	0.137589	0.287055	0	0	0.020108	0.007203	0.007396	0.434012	4.15991	2.5272	0.270194	0.0270403	0.00113133	0.436538	1.5946	2.82541	3.7174	4.10177	4.87429	0.145635	turquoise
JreChr01G13142	1.26613	0.266445	0.565319	1.25719	0.156594	3.45426	0.228158	0.150869	0.927182	0.11119	0.143548	3.47816	0.246412	0.137622	0.135082	0.219179	0.206245	0.216224	0.142436	0.206383	0.129097	5.49154	5.41694	0.223069	0.699297	1.62268	0.435403	1.2443	0.173039	0.213883	0.159305	3.71051	1.27097	0.960097	2.31913	2.96561	3.59663	3.60903	0.961342	1.92595	6.19141	0.135479	4.9049	5.22406	4.66435	1.56701	1.32967	0.263527	blue
JreChr01G13144	3.24794	0.958492	0.335732	7.75936	19.4711	7.15436	1.08312	1.70666	98.975	2.54852	8.74197	3.70899	2.4949	3.28827	12.4555	3.87986	3.21374	4.93905	1.54403	0.14647	0.505584	1.61574	1.58606	2.62063	1.51405	11.4616	33.9216	4.99983	6.07954	4.01088	0.732028	1.94081	2.05165	8.24042	1.37579	1.73859	0.639514	4.40494	2.96742	3.352	6.10175	3.44722	5.45822	7.17745	7.29674	4.13871	6.46377	21.1439	yellow
JreChr01G13152	12.646	17.0194	15.8513	19.7286	13.944	16.6789	17.4131	13.1373	11.7941	3.97419	4.22084	3.41407	4.16322	3.20295	3.49896	3.61443	2.76396	3.12326	0.911074	1.58331	0.728149	2.12668	1.57815	2.2858	15.1722	16.7839	14.1148	3.8697	3.62171	3.16722	1.07418	1.99688	3.09107	6.16445	7.73425	13.3088	8.04435	5.21995	2.87013	2.66568	2.17484	4.05006	2.16918	2.34934	1.72318	0.843923	12.7816	3.52457	yellow
JreChr01G13155	0.39853	1.79128	0.865325	2.62374	1.1729	0.986602	2.81148	1.41477	3.84231	2.03929	2.79451	3.68041	1.85449	3.38139	1.70258	12.5846	5.77949	9.63275	4.60447	5.70671	5.71481	6.17634	6.59532	8.38486	1.01838	1.59441	2.68952	2.83807	2.31282	9.33227	5.342	7.05217	5.66329	3.72465	5.6299	2.22971	1.36417	5.22945	3.57606	13.121	17.9769	0.221985	2.43335	0.952227	2.36772	8.55647	1.09242	1.8912	green
JreChr01G13156	140.864	176.238	140.458	34.0522	46.6362	2.67075	32.8085	31.5679	32.7942	20.0723	17.4455	19.1573	26.1374	29.5895	26.6032	46.7616	33.3164	48.0242	28.5994	25.3216	28.9912	27.9302	34.8437	40.0369	152.52	27.7864	32.3902	18.8917	27.4434	42.7007	27.6374	34.2703	35.8086	33.9734	27.7957	28.7259	123.711	59.1035	47.6238	46.7363	44.5442	128.738	87.9484	109.066	74.5191	43.2356	150.966	13.7908	turquoise
JreChr01G13160	8.13833	9.23906	7.10391	4.63846	6.7859	6.26737	4.93758	3.44775	4.62291	1.70825	1.46186	1.90876	3.03553	1.46919	2.97183	2.45346	2.67439	3.97717	1.56927	2.63137	2.06891	4.70671	3.1523	6.59737	8.16043	5.89725	4.33608	1.69295	2.49218	3.03501	2.08985	4.8188	0.050118	4.28983	2.35133	5.07015	5.89348	4.71131	4.97929	3.91989	4.68152	3.92616	3.58559	4.29324	2.92518	3.69688	7.85434	2.18278	turquoise
JreChr01G13165	109.168	89.0221	51.2185	38.3585	39.7482	51.4613	42.1244	31.3937	35.8609	17.0255	16.6571	12.3971	26.217	26.5841	31.503	37.2866	28.2357	25.4476	27.3627	28.3909	28.8352	31.0067	32.5353	2.51499	83.1362	43.1893	36.4597	15.3599	28.1014	30.3233	28.1963	22.019	29.8801	28.9665	1.57531	38.7238	69.0407	75.2325	55.0018	67.0659	52.1408	113.898	88.4056	78.0681	80.9652	96.1896	100.038	29.2962	turquoise
JreChr01G13185	47.172	30.3728	43.2853	18.5173	19.2985	21.8135	12.8872	12.6231	18.959	16.0515	13.3864	12.9537	17.8341	18.2306	14.5482	30.1579	23.333	32.0638	31.1738	23.4211	25.4428	26.1851	31.2326	23.1258	40.2767	19.8764	14.8231	14.1306	16.871	28.5182	26.6792	26.8478	18.5136	21.7928	18.2095	23.7053	47.1844	35.0884	26.7317	28.9226	24.0367	27.6589	28.9789	29.9433	26.6383	23.2703	44.4519	11.477	brown
JreChr01G13192	9.82376	9.78602	5.87016	4.02349	4.71019	5.54982	1.73062	2.34811	4.39402	2.18483	2.09821	0.149504	1.86847	0.760862	1.35705	3.7188	2.33146	3.05535	1.37288	2.27769	3.28686	3.09849	2.5268	0.907733	8.49332	4.76117	2.82425	1.47751	1.32879	3.0352	2.31248	2.17767	0.06377	2.91793	2.5845	4.79311	9.33665	6.80761	3.42215	3.81931	3.64296	13.3635	17.5146	13.7281	13.2043	12.4644	8.05788	1.755	turquoise
JreChr01G13196	24.4088	26.2264	27.1432	12.5344	12.7145	20.8455	9.97856	10.382	7.60694	5.24892	4.84495	5.85595	5.19162	4.68468	6.09575	6.42315	5.59549	5.07652	6.9165	7.37836	6.8883	6.71564	5.00134	8.83333	25.9261	15.3648	9.32251	5.31661	5.32402	5.69838	7.06105	6.8501	5.47293	5.88928	4.73518	11.1235	17.331	17.7561	13.0589	20.2287	16.2516	18.5732	17.8909	14.8481	17.3338	17.8412	21.921	6.72998	turquoise
JreChr01G13197	4.51426	5.63813	4.48341	3.87079	4.69129	4.23001	3.90609	2.97828	0.130247	4.53575	4.68786	4.84861	4.44094	4.8234	3.24391	8.72951	7.25284	7.9429	9.4733	9.23	8.33319	0.296076	0.240506	2.18075	4.8786	4.26403	2.33821	4.69074	4.16942	7.97508	9.01216	0.905778	8.41708	6.34894	3.21408	4.55865	8.54837	6.63778	7.61886	5.96911	5.74876	5.19557	2.18238	2.11157	3.74912	3.62724	4.99806	3.3446	green
JreChr01G13198	32.5567	25.287	26.4451	16.6158	18.1229	19.9611	15.0371	16.7969	13.6556	12.75	7.16025	11.5218	13.8439	9.28895	7.59198	19.5623	11.0061	19.7994	22.2987	12.4783	19.8738	21.8286	18.2624	28.4348	28.0963	18.2333	15.1632	10.4773	10.2416	16.7893	18.2169	22.8419	14.4769	17.39	15.9217	16.2674	33.8354	44.5869	54.6654	40.6013	36.5495	52.2843	53.8635	56.9971	53.1623	57.0847	30.3442	10.8669	brown
JreChr01G13226	137.741	89.6114	96.2864	50.6437	32.9332	34.7492	49.8892	36.9338	43.466	12.2311	60.0641	63.5941	46.6933	40.7741	51.995	83.3865	42.3567	103.774	15.7108	22.1674	20.7389	14.8855	24.7742	48.1866	107.88	39.442	43.4297	45.2964	46.4875	76.5057	19.539	29.2821	41.1636	46.3155	46.6829	26.3783	256.843	226.022	221.954	161.588	82.7846	540.398	374.456	539.89	814.007	419.92	106.231	56.9281	turquoise
JreChr01G13227	15.8335	16.6854	31.4915	57.2828	72.6166	29.759	70.3504	65.8912	76.928	63.8914	56.4369	74.0592	80.738	76.1329	116.425	73.0229	70.5711	120.051	132.56	108.919	102.327	170.034	192.787	227.326	21.3368	53.2195	71.0565	64.7958	91.0986	87.8818	114.602	196.716	87.3374	100.93	2.72951	112.977	25.4691	49.849	39.3628	41.4018	99.9553	10.991	28.0623	20.1374	19.0057	13.5582	21.8049	85.3442	blue
JreChr01G13228	6.68192	5.25039	4.06325	5.10735	2.35004	2.19677	2.97908	3.74694	2.53859	1.99385	0.07636	0.566977	1.31978	0.43726	0.106223	0.100504	1.47174	0.484796	2.25476	1.65649	1.81444	2.03396	2.77058	2.20789	5.33185	3.21805	3.0882	0.879064	0.621089	0.685679	1.90856	2.33748	2.98584	6.12201	2.78454	3.12717	10.0052	4.76807	2.44099	3.41796	2.87872	2.75018	2.6203	4.40424	3.28295	3.17171	5.48718	1.56391	turquoise
JreChr01G13232	5.89531	5.77305	6.91166	2.77892	2.25795	1.63827	0.658857	0.470247	0.190698	0.296371	0.46537	0.191705	1.62719	0.490886	0.517813	0.124842	0.429774	0.364174	0.078259	0.484447	0.131382	0.154772	0	0.125131	6.19334	2.22505	0.439934	0.317815	0.87863	0.306263	0.231363	0.093301	6.10408	6.0761	0.768305	1.29085	49.3914	98.394	142.779	127.064	88.0011	6.69237	1.78062	1.7829	9.89902	0.481446	3.84176	0.611992	turquoise
JreChr01G13238	35.8397	52.5615	30.8166	1.30949	0.572942	5.15292	0.524959	0.420001	0.077011	0.241947	0.698876	0.825961	0.235853	0.413035	1.12547	2.23353	0.640164	0.503663	1.0571	0.838534	0.880425	0.037766	0.657247	0.501938	39.7393	2.34512	0.340657	0.588928	0.591451	1.12579	0.925354	0.398984	0.046718	0.362391	0.455927	0.316381	1.63046	0.438772	0.119251	0.237551	0.304026	24.3032	6.41396	0.91208	0.881306	3.41751	52.5946	0.294064	turquoise
JreChr01G13248	3.58995	1.35744	1.17151	0.654903	0.482195	0.687433	0.063741	0.017686	0.769167	3.06301	3.35417	3.01113	5.0397	5.61117	5.50254	4.80369	3.36686	6.70993	4.30715	3.12033	3.47928	6.84535	7.77343	7.24357	2.03964	0.608177	0.283531	3.14277	5.38447	4.96016	3.63559	7.28745	0.104191	1.39461	6.49106	2.21647	5.29218	9.35961	11.091	8.09968	10.0172	8.72496	4.85052	3.4995	2.65747	5.01023	2.75847	2.77309	blue
JreChr01G13249	51.284	48.2231	47.484	26.9745	42.5253	39.4467	27.184	26.6359	31.9932	21.8455	22.3064	21.5172	24.6767	24.0469	22.0781	30.1291	26.4674	28.388	59.8043	40.289	54.1829	60.7171	61.1406	70.072	48.997	36.3155	28.6044	21.8897	23.6006	28.3282	51.4254	63.9766	77.6251	66.3108	29.1531	43.4692	50.3835	64.528	56.7814	60.9737	54.5445	32.8492	49.5966	39.7869	46.8126	46.4854	58.235	29.1672	blue
JreChr01G13250	0.722013	1.3292	0.895085	1.45667	0.673409	0.657131	1.28407	1.35035	76.334	44.4518	47.3192	34.2497	47.9735	35.3855	58.4125	1.034	85.8666	1.62837	0.873176	1.42067	135.741	155.804	152.328	142.827	0.982101	0.929069	26.3228	42.0069	47.2572	29.5096	46.0116	150.32	1.89792	0.727714	1.79802	69.3433	47.1356	88.894	0.914406	0.866957	38.0801	0.642744	0.802747	0.816165	0.70897	0.602984	0.955762	53.5173	blue
JreChr01G13255	2.83194	4.28589	2.68366	2.23874	1.65163	2.00108	4.30729	4.75167	3.66917	1.26286	3.25466	1.93705	2.97283	0.617118	2.90332	1.68679	1.54791	2.24904	0.524436	0.785367	0.624255	0.059313	0.297303	0.137625	3.26716	1.96382	4.24271	2.15152	2.16442	1.82791	0.644686	0.164747	1.89198	2.55457	1.62883	3.29085	13.7525	10.9701	9.07844	11.0328	4.75051	8.63198	10.6827	8.28175	8.20486	7.25338	3.20233	2.20908	yellow
JreChr01G13260	21.1431	13.2863	2.00531	6.17275	7.0625	9.52516	7.13648	7.66284	8.81223	6.3682	4.15595	4.10353	4.7209	4.45199	3.65498	8.06767	5.18271	10.0059	11.7639	10.4032	14.3242	21.1227	21.6412	23.6221	12.1449	7.58681	7.87052	4.8759	4.27596	7.75208	12.1638	22.1287	2.41091	23.3708	11.3618	6.63498	76.5692	31.2941	26.2518	35.1019	99.6637	34.2257	29.0628	38.8303	82.1621	123.916	16.7636	3.75688	blue
JreChr01G13262	31.5411	33.3424	31.7552	15.9631	19.4516	18.3352	17.4669	13.9724	15.0587	11.3163	12.2681	14.2995	11.5638	11.4128	10.9246	17.3134	11.8619	14.7912	18.1224	22.1591	22.4697	34.3727	29.479	20.2259	32.2129	17.9166	15.4993	12.628	11.3004	14.6555	20.9171	28.0259	32.5579	38.9777	16.0444	12.7807	34.7943	41.8498	29.4028	28.6448	28.6204	18.9032	22.9771	19.254	20.5503	17.2221	27.2721	12.4993	brown
JreChr01G13269	10.8709	9.03556	14.7382	1.51558	2.08894	1.61533	0.522567	0.38451	0.61472	0.848619	0.390896	0.48147	0.360491	0.105815	0.087385	0.518616	0.847265	1.05183	2.70923	1.8486	4.39032	3.69912	3.36378	3.59386	11.5482	1.73995	0.507266	0.573662	0.184564	0.805905	2.98272	3.55225	0.402866	4.4426	0.459658	1.19705	2.077	1.48796	0.351275	0.654789	1.78787	0.863974	0.261863	0.245133	0.157877	0.121768	7.08115	0.247259	turquoise
JreChr01G13271	0.316985	0.167378	0.463512	2.47472	0.344881	0.570543	2.24893	2.30463	3.28035	0.067976	0.278395	0.996193	1.06577	1.69143	2.11786	2.49596	1.97053	2.22225	0.550211	3.77853	4.18587	4.79352	6.36237	1.33904	0.315958	1.13005	2.6113	0.447521	1.62502	2.22958	2.8382	4.16498	1.02417	7.32949	2.11095	0.541332	3.74439	4.42376	2.53359	6.63224	7.46356	5.21084	4.07869	7.88714	5.81736	5.02087	2.29698	2.18664	blue
JreChr01G13273	3.25052	3.31557	4.08131	1.71638	2.19903	1.08964	0.439182	0.549111	0.256005	0.08288	0.270755	0.076122	0.090466	0.594693	0.142119	0.083978	0.099127	0.712448	0.728327	0.176437	0.406389	0.289008	0.461764	0.094563	3.54913	1.66835	0.414766	0.143252	0.275759	0.298518	0.437051	0.281778	0.131904	0.301552	0.188605	0.902345	0.496879	0.70643	0.356051	0.234124	0.153721	0.0276757	0	0.020169	0.102995	0.0565713	2.7307	0.282403	turquoise
JreChr01G13281	37.3123	33.0451	38.5643	25.7569	19.7289	27.8818	22.7959	24.1057	1.82358	17.0751	16.4723	19.3468	20.6968	20.9434	21.9057	21.7701	18.5264	23.6378	22.3791	20.5845	21.514	19.5506	2.96977	11.1328	36.3072	24.4559	16.2418	17.6314	21.182	21.3114	21.4925	11.2177	19.99	18.8655	25.5656	23.652	30.5343	31.1116	31.6562	32.7296	30.3058	28.3274	25.2808	27.8231	25.6127	28.4901	36.425	15.8755	turquoise
JreChr01G13288	12.7931	13.947	12.7164	1.30974	2.17911	1.53437	1.04407	0.973511	0.658168	1.70771	2.61684	2.16989	1.77795	1.12589	1.76722	0.55229	0.992622	1.56787	0.207561	0.423996	0.993197	0	0.183644	0.020501	13.1522	1.67441	0.891915	2.16481	1.55702	1.0376	0.541585	0.0680483	0.858413	1.85781	0.113225	1.88084	14.4084	7.02522	2.17689	3.01396	1.7478	10.2055	3.81317	9.94904	7.08235	4.53939	8.94487	2.58064	turquoise
JreChr01G13291	0.515804	1.48293	2.65553	2.05447	3.07306	2.26876	0.122659	0.900021	0.598754	1.76813	1.50946	1.8959	0.01855	1.22679	1.22057	5.11317	1.38914	5.57491	9.07165	2.96281	7.21332	4.68705	8.33527	3.76767	1.55142	2.46543	0.540478	1.7245	0.821968	4.02574	6.41593	5.59666	9.93994	3.24214	0.816904	1.04531	2.84879	5.25784	1.89397	3.07187	19.2709	7.91625	11.1092	34.3763	24.4139	13.4348	2.16047	1.09342	blue
JreChr01G13293	250.483	254.368	268.099	303.292	269.929	394.376	249.7	235.901	220.437	1.08988	133.811	149.452	191.919	181.235	171.56	193.64	179.73	233.026	111.468	117.314	86.6597	62.1674	96.3563	113.313	257.65	322.532	235.346	94.7843	181.571	202.132	105.147	90.6121	68.3483	135.322	159.44	225.21	193.349	177.847	119.016	156.832	134.35	172.536	199.039	146.173	109.497	117.038	282.984	156.55	yellow
JreChr01G13297	67.203	56.7871	40.2873	33.5229	46.7382	29.8748	21.5792	22.7447	23.655	9.92254	9.77429	10.9162	13.0863	12.2495	12.8667	15.7477	17.5214	16.9594	28.219	21.6996	32.8871	35.2787	31.3365	30.9188	54.7591	36.712	22.6596	10.2044	12.7342	16.7428	27.6019	32.5113	18.2923	23.7566	17.072	25.6374	57.613	35.6659	31.6276	37.2166	24.1464	43.2305	37.9252	42.6466	40.0498	32.0565	39.5782	15.9234	turquoise
JreChr01G13306	28.9921	28.784	26.7384	14.2302	1.01976	16.5754	9.38983	9.16253	8.7969	6.18074	5.38102	6.81288	7.54175	5.79244	5.19952	7.0538	8.55741	7.45685	4.31636	5.8331	5.28848	4.43232	5.95978	2.79715	28.1715	10.6085	9.11642	6.12488	6.1779	7.68935	5.14598	4.39642	6.98242	4.05435	7.60643	8.47207	14.3537	7.29135	5.16771	7.83482	8.81986	13.2835	10.106	12.6778	9.31299	6.886	16.2847	3.34569	turquoise
JreChr01G13312	8.74745	4.37913	4.35043	1.34582	1.20859	2.03442	0.405608	1.35987	2.74654	0.093943	0.373822	1.56917	0.521954	0.075454	0.79186	0.318538	1.3406	0.538145	2.48525	0.523239	1.36599	2.66245	2.39533	1.39012	5.82567	1.52961	1.50401	0.678979	0.463089	0.732428	1.45816	2.1493	1.21301	0.06583	1.13573	1.34288	2.92416	2.30694	3.08938	1.79842	1.81498	3.50902	3.06205	2.55285	2.21452	2.19122	5.81156	0.545719	turquoise
JreChr01G13313	61.9076	64.7691	49.9724	1.5659	2.31488	1.00941	2.9376	3.76771	0.599287	1.12096	1.16925	1.95639	1.01342	0.875349	0.596657	0.585838	0.589346	0.104781	0.347139	2.15285	1.58456	2.62008	5.04761	3.59306	58.883	1.63006	2.43486	1.41553	0.828476	0.426655	1.36152	3.75359	3.04717	2.45551	0.641878	1.57728	18.6203	6.88366	4.55207	2.60511	2.98725	6.37329	5.59819	5.95224	5.9013	4.61183	56.7721	1.07875	turquoise
JreChr01G13315	0	0	0	0	0	0	0	0	1.54788	0.16128	0.359927	0	0	0.87874	0	4.60442	1.2798	9.72758	6.80643	2.49359	7.61925	20.2601	29.2771	65.0761	0	0	0.515961	0.173736	0.292913	5.20394	5.63976	38.2045	0	0.249278	24.9977	0	0.370794	0.220518	0.486659	1.36208	34.1816	0.275489	0.90601	0.776941	0.495147	0.295378	0	0.150005	blue
JreChr01G13317	29.2074	0.613674	57.025	54.0766	61.0003	30.9803	28.4749	27.0866	36.2466	6.83334	7.38598	8.5598	8.83136	9.09324	8.68795	17.1171	30.6603	37.603	31.0111	16.8456	71.9952	46.8162	50.0329	45.9551	28.9487	48.6857	30.6027	7.59304	8.87085	28.4601	39.9506	47.6014	30.7017	35.8228	17.9845	29.7885	61.2569	38.8742	16.5682	56.368	83.376	47.3604	55.7766	47.4202	53.0031	59.3003	34.9085	7.94273	blue
JreChr01G13325	0.114613	0.207628	0.220247	0.039725	0.115841	0.017515	0.081719	0.070256	0.041381	0.243796	0.348687	0.340386	0.319829	0.737081	0.179095	0.539834	1.42523	0.473648	4.74674	0.947765	4.70703	5.87175	5.30793	4.98936	0.180829	0.0576937	0.064452	0.310956	0.412002	0.812905	3.46718	5.38968	3.3932	1.21331	0.128176	0.057648	3.38096	2.68492	0.941877	1.37415	2.55328	4.36293	4.96117	4.86823	4.3489	5.25695	0.123455	0.255372	blue
JreChr01G13326	0	0	0	0	0	0	0.040682	0	0.061733	0.238816	0.445386	0.518442	0.350537	0.195054	0.133606	4.06385	1.46213	0.752537	3.68616	2.01927	9.19001	4.5742	3.95798	2.76897	0	0	0.0341383	0.400881	0.226399	2.09284	4.96515	3.76705	1.1563	0.654138	0.145628	0.066709	4.83438	1.79304	1.12079	3.71954	3.20682	0.0643903	0.041787	0.0431643	0.047641	0.130426	0	0.120514	blue
JreChr01G13339	35.5822	26.232	32.3377	12.079	13.5148	15.8627	11.3021	10.0022	10.5927	9.3119	7.39792	8.07739	8.88345	9.4885	9.91895	13.9053	11.5012	15.1961	15.4968	13.1598	14.6054	18.831	21.0853	32.0686	31.384	13.8188	10.6323	8.2624	9.4303	13.5342	14.4207	23.995	12.8177	12.5973	11.1301	11.8683	48.2177	40.4721	46.3771	36.3517	29.7926	32.0526	27.5408	21.3089	19.0096	17.3467	31.6913	8.53401	brown
JreChr01G13340	4.15306	1.61898	2.56055	1.32452	1.4706	0.821165	0.741113	1.86182	0.795734	0.592563	0.928522	0.43724	1.18973	1.00524	0.036999	1.75987	0.794338	2.06449	2.74702	2.20869	4.88371	6.35441	3.50101	4.38419	2.77753	1.20543	1.13289	0.652775	0.743989	1.53956	3.27981	4.74653	2.6637	1.98036	0.135519	2.90335	4.92144	4.20379	2.45786	2.88756	3.28452	4.03539	4.47323	5.5095	3.95562	2.52145	2.34746	0.313946	blue
JreChr01G13341	29.8116	30.718	31.4086	15.6391	20.3861	17.1737	19.7919	17.5838	23.6635	19.6765	19.1379	22.3423	23.4395	24.9925	17.9394	34.9518	4.37446	32.5455	46.6788	30.4552	40.9121	61.0971	72.3852	34.8377	30.6461	17.733	20.3464	20.3856	22.1238	23.9572	39.3487	56.1066	86.0682	58.3283	0.701917	28.7711	26.5547	15.6525	15.5345	20.6944	34.076	23.0293	29.2658	40.2058	29.8429	25.2476	38.3831	19.3003	blue
JreChr01G13348	1.59642	6.43235	4.03649	0.061167	0.564745	0.869356	0.977137	0.750619	1.21162	1.34481	0.784772	0.972151	1.09596	0.500569	1.09695	1.3075	1.73878	1.87145	3.57134	3.05354	2.55859	5.99791	6.29232	8.47067	4.02175	0.498423	0.979791	1.03391	0.897827	1.63924	3.06116	6.9203	1.14868	2.84737	0.898982	1.26277	6.00581	2.01611	2.26984	1.91358	3.10811	3.31294	2.40554	3.93103	2.65591	1.47059	4.14167	0.859723	blue
JreChr01G13353	25.1651	23.9096	27.1635	40.6712	32.7342	37.4458	30.6472	28.6751	27.8475	37.0888	35.9772	27.3511	32.7055	28.5688	28.7073	42.5335	36.8159	33.8847	18.5566	21.5151	14.5698	9.19061	11.0429	22.883	25.4127	36.9504	29.0566	33.4724	29.9938	37.7447	18.2138	14.3722	20.0693	23.9196	40.5997	34.3349	17.9587	34.6662	27.7398	30.5371	8.2367	19.7326	23.2312	29.2398	32.4731	32.2049	25.862	32.3641	yellow
JreChr01G13355	18.7468	16.932	14.928	4.91755	6.47216	7.35858	5.18731	3.41184	7.11324	3.28316	2.63143	2.5079	3.98491	3.30772	4.80013	4.61085	5.3534	7.57882	8.16231	4.21934	8.60487	13.3098	10.0466	11.2151	16.8689	6.24943	5.23746	2.80749	4.03092	5.84769	6.99551	11.5239	6.94493	11.9422	7.18445	5.85866	18.8703	12.5332	11.8579	15.3352	11.3271	20.7818	19.337	18.0785	16.0145	13.106	16.0875	1.67971	turquoise
JreChr01G13366	12.9168	10.1776	8.70062	0.000567	0.008452	3.01399	0.002792	0.007511	0.013014	0	0	0	0	0	0	0	0	0	0	0	0	0	0	0	10.5983	1.00767	0.00777233	0	0	0	0	0	0	0	0	0.001167	4.11747	0.047182	0.00534433	0.00377267	0	0.441293	0.003166	0.200656	0.004542	0.0161037	11.479	0	turquoise
JreChr01G13368	91.7681	75.5368	70.1331	10.2139	14.9663	11.9457	6.30579	8.94687	11.5206	10.7969	16.2787	13.1578	12.8027	15.8782	10.2072	10.2573	10.5849	16.2827	17.4996	15.4149	16.2961	22.7041	20.7139	28.5731	79.146	12.3753	8.92442	13.4112	12.9627	12.375	16.4036	23.997	18.469	17.1282	9.68881	21.0098	130.92	56.3027	18.2751	15.5959	15.3567	37.3402	31.0916	21.5516	16.0041	11.5073	85.9824	7.64985	turquoise
JreChr01G13371	167.804	5.22275	9.98771	68.8073	64.3028	31.5001	979.577	892.924	571.354	1556.78	1171.08	1238.63	1167.01	3112.59	1916.02	1168.58	1463.55	1263.27	2455.18	913.337	2551.32	3840.76	5320.6	3654.87	61.0049	54.8701	814.618	1322.16	2065.21	1298.46	1973.28	4272.08	1772.8	1502.67	4147.99	723.219	3.23513	68.9765	173.507	520.779	2278.87	0.920943	3.69879	1.90023	2.41976	2.311	26.2894	1428.58	blue
JreChr01G13372	15.4187	12.0415	12.7424	5.13631	5.03246	5.79616	6.74962	4.57967	2.71043	0.8757	1.06121	0.561184	0.750871	0.325343	0.854513	0.655279	0.356262	0.928126	0.065565	0.350454	0.260776	0	0	0.073669	13.4008	5.32164	4.67991	0.832698	0.643576	0.646556	0.225598	0.0245563	2.00285	1.04185	0.079424	2.63648	19.611	16.928	10.2489	6.38683	2.52781	47.3449	44.0239	39.1387	44.4571	39.4083	15.6798	1.1927	turquoise
JreChr01G13375	54.8141	51.7547	44.5298	25.5521	20.9945	28.385	32.6238	26.1819	27.4264	17.1261	15.8171	18.9523	14.6313	15.9376	16.2837	18.1055	16.6838	22.6236	21.972	19.7692	21.6411	22.2909	25.4638	1.26516	50.3662	24.9772	28.744	17.2985	15.6175	19.1376	21.1274	16.34	34.5162	25.9735	24.1151	1.94915	38.0945	39.2215	39.6882	35.6666	29.9818	52.7462	45.2783	42.7878	40.1761	36.8429	54.9728	26.4186	turquoise
JreChr01G13376	7.22426	131.07	91.3434	22.2089	24.3005	2.42636	12.9238	25.582	19.0011	12.3238	12.1948	13.1849	23.8514	17.4402	17.0721	17.1488	7.45243	16.9626	20.6542	14.7811	21.3491	24.0726	1.44838	0.510878	76.5459	16.3119	19.169	12.5679	19.4546	13.8546	18.9281	8.67728	21.1247	27.0347	18.3802	25.9066	51.6251	25.8922	29.6881	29.5233	35.8155	46.2266	25.7445	34.8588	16.2759	17.6224	55.5063	10.1016	turquoise
JreChr01G13377	19.1242	13.9288	19.7039	16.8947	16.2017	17.67	50.6777	64.3113	54.8083	26.5754	17.4561	21.7046	11.527	13.3203	14.6294	39.2352	18.3608	42.839	8.71882	9.49638	5.8493	10.3506	14.0264	22.9908	17.5857	16.9221	56.5991	21.912	13.1589	33.4784	8.0215	15.7893	13.0727	39.3553	46.2449	33.0323	11.1653	22.5705	25.9376	28.1292	25.179	14.8626	10.1221	29.0862	33.216	12.409	22.6521	30.31	yellow
JreChr01G13379	8.8979	7.51458	7.95453	3.28971	4.48663	3.7685	3.36016	2.73105	2.48234	0.640607	1.94548	0.94616	0.717424	1.16146	1.05776	3.60859	1.18885	2.16223	2.09941	2.34284	2.24931	0.747351	1.28537	0.162903	8.12234	3.84828	2.85785	1.17741	0.97888	2.31989	2.23052	0.731876	1.88889	2.25886	1.03463	3.13314	8.47668	7.90681	5.97181	8.04652	5.65379	8.48674	10.2782	14.64	11.9867	13.0621	8.21851	0.999529	turquoise
JreChr01G13380	2.61321	11.0949	0.382169	0	0.033081	0.149644	0.037686	0.009369	0	0.037398	0.020865	0	0	0.032438	0.019842	0.017879	0	0.041765	0	0.006756	0	0	0	0	4.69675	0.0609083	0.015685	0.019421	0.0174267	0.0198813	0.002252	0	0	0	0.370284	0	8.77925	0.836866	0.313514	0.129875	0.011308	0.843629	0.868622	0.970298	0.363959	0.00944067	0.316124	0.00599833	turquoise
JreChr01G13381	0.234421	0.290798	0.385289	11.5461	10.9432	13.14	12.5867	10.4338	0.406917	6.55282	2.95442	4.4845	6.28741	1.40962	5.78754	8.5126	8.58951	7.08234	3.68963	3.22208	0.200421	1.32275	5.52191	3.76836	0.303503	11.8764	7.80911	4.66391	4.49486	8.06148	2.37071	3.53767	0.668324	0.554127	5.53694	12.9882	68.1334	28.45	20.1443	25.7506	21.1309	29.0273	42.4154	41.5512	32.3375	21.5265	27.3268	1.77948	red
JreChr01G13394	29.002	21.851	24.5745	22.0179	21.2212	24.5106	25.3167	22.146	20.0234	15.7557	15.935	18.3708	27.2173	29.2973	25.1832	50.2726	30.6577	51.5997	60.4811	40.5554	68.4139	52.3888	53.6948	85.5802	25.1425	22.5832	22.4954	16.6872	27.2326	44.1767	56.4835	63.8879	37.1885	32.0101	23.571	21.6755	55.1636	75.5401	65.8515	66.8845	56.7974	50.2933	49.8478	59.082	59.5675	57.1066	27.3322	14.8954	blue
JreChr01G13397	2.1977	4.70605	5.6931	5.23403	4.6225	5.75499	2.14062	1.61819	3.69389	1.28209	0.130042	0.99131	0.870465	0.560631	1.44969	1.38864	1.15908	1.30048	1.01723	2.26314	1.47535	0.311493	0.072589	0.832499	4.19895	5.20384	2.48423	0.801147	0.960264	1.28273	1.58524	0.405527	1.33767	2.00077	0.64946	0.406884	2.64497	4.59119	4.94722	6.22377	5.01382	2.89361	3.35582	4.08162	4.56487	3.60545	4.26493	1.89006	turquoise
JreChr01G13405	255.222	239.487	196.781	52.6717	91.2689	70.3959	64.8268	46.2942	72.089	51.0455	66.0669	53.4741	49.926	61.6074	60.7054	55.5489	52.5634	61.1594	57.0302	49.2369	55.7279	62.7336	66.6057	60.0259	230.497	71.4455	61.07	56.8622	57.413	56.4239	53.9983	63.1217	94.9397	84.3207	55.1348	52.636	102.412	62.7071	68.2324	47.9688	66.6285	55.7742	52.3933	47.5026	38.9859	43.5183	215.459	49.5828	turquoise
JreChr01G13407	1.40064	3.06435	3.5782	0.315206	0.007934	0.180801	1.16341	0.004017	0.408541	0.006848	0.647166	0.007738	7.13889	0.634723	0.883997	0.905725	0.179736	0.005044	0.005998	0.002839	0.001412	0.002239	0.004233	0.004468	2.68106	0.16798	0.525322	0.220584	2.88587	0.363502	0.00341633	0.00364667	7.45761	7.42852	1.59923	2.12362	138.256	223.327	221.289	280.815	75.3389	8.84358	6.21973	50.9134	35.3351	5.52276	1.93269	0.263537	turquoise
JreChr01G13408	0.29808	0.010967	0.176579	8.23656	3.07527	6.05593	9.64404	8.22991	10.09	7.03302	1.84101	3.46198	8.19026	9.58198	0.805621	3.01938	5.28634	2.85615	7.14391	1.82054	8.22373	8.08428	12.971	6.14746	0.161875	5.78925	9.32133	4.112	6.19262	3.72062	5.72939	9.06757	5.74797	26.7811	7.07238	13.3066	0.797267	1.7808	1.79527	2.50593	14.3711	0.101012	0.083763	0.0329113	0.144592	0.000761	0.401381	6.83195
JreChr01G13410	2.55301	5.64803	13.312	3.00347	3.59626	16.4319	2.37144	1.25023	9.26489	1.60034	9.92658	9.36838	2.67076	1.82911	2.1832	8.67596	1.40083	1.65484	21.1721	2.01378	3.48403	14.8927	2.03309	19.6143	7.17101	7.67719	4.29552	6.9651	2.22769	3.91054	8.88999	12.18	2.18253	55.6506	24.2172	15.8578	2.52273	7.87499	8.92362	2.0831	12.7338	30.411	18.7739	14.8224	13.0252	7.84875	13.2741	11.6074	blue
JreChr01G13416	25.9331	18.2132	18.7536	8.80216	7.03377	10.0704	10.2247	7.98069	4.28967	3.64823	2.53861	4.75696	1.5657	2.49239	2.43736	4.6109	1.77087	4.96164	5.37556	4.14946	5.47081	5.30627	6.78442	4.97633	20.9666	8.63544	7.49836	3.64793	2.16515	3.78114	4.99861	5.68901	6.79341	4.65572	1.285	4.93844	20.4061	21.7345	25.0751	29.8988	24.4928	139.763	175.861	149.096	173.558	138.386	22.3891	9.16372	turquoise
JreChr01G13419	5.03738	6.56155	10.0748	2.27114	2.77468	1.15038	0.592505	0.962673	0.97413	1.3901	1.22568	2.54407	1.3423	1.70109	0.224472	1.0175	2.60079	1.56655	12.5673	5.14172	26.1417	13.3135	23.5807	12.3221	7.22458	2.0654	0.843103	1.71995	1.08929	1.72828	14.6169	16.4055	11.8766	11.0965	3.56095	5.19848	0.000574	0.00415233	0.00914833	0.088311	2.53658	0.462919	0.611727	0.679845	0.002354	0.00563833	4.12676	0.257988	blue
JreChr01G13424	2.8284	3.77361	6.3507	5.39097	7.69029	3.69251	6.26268	3.61453	5.38899	38.9822	36.1141	32.6721	11.6005	12.1094	8.53326	7.28037	7.62987	6.57535	8.75619	7.77662	8.82608	23.6032	14.2544	13.8891	4.31757	5.59125	5.08873	35.9228	10.7477	7.16186	8.45296	17.2489	27.0933	22.3222	8.81143	14.6377	5.20053	6.95563	31.9373	13.627	11.2286	15.5886	13.9104	15.5623	12.2463	12.4985	4.43539	15.0193
JreChr01G13425	4.48207	6.64618	7.02564	2.27575	1.30723	1.40903	3.51865	2.09115	1.72604	0.190214	0.961488	0.705749	1.06121	0.564642	0.794599	1.73492	0.785577	1.2883	1.26267	0.857807	1.86062	1.37244	3.76494	2.14065	6.0513	1.664	2.44528	0.61915	0.806816	1.2696	1.32703	2.42601	1.02605	1.01319	1.69554	1.62309	3.99319	1.90483	2.26006	3.07363	4.18188	5.38262	5.05188	5.29635	3.89668	2.88378	4.0621	0.838308	turquoise
JreChr01G13433	6.70618	7.42188	5.70216	0.691588	1.45033	1.66451	0.116863	0.515511	0.483379	0.069666	0.505533	0.215418	0.161259	0.025457	0.040611	0.545418	0.151545	0.451915	0.00607	0.009921	0.637158	0.01786	0.018056	0.010694	6.61008	1.26881	0.371918	0.263539	0.0757757	0.382959	0.217716	0.0155367	2.05155	0.669612	0.018669	1.13087	14.0326	7.6386	7.15547	10.8026	9.17574	9.1099	11.9275	18.9667	15.9383	12.0903	7.12298	0.103128	turquoise
JreChr01G13445	3.62356	4.67589	2.89964	3.70651	6.26614	6.6594	5.08735	3.39789	6.03042	0.801886	2.17396	2.01534	2.35357	0.912835	2.16302	5.61142	3.32137	5.37543	6.72145	5.36637	6.61839	9.89132	6.46989	8.01221	3.73303	5.54402	4.83855	1.66373	1.80981	4.76941	6.23541	8.12447	3.50007	2.5026	5.61235	5.09472	8.00823	7.55544	7.07795	7.14234	8.41156	4.30803	4.09784	6.89644	5.70491	5.49518	5.20189	2.19779	blue
JreChr01G13450	0.154415	0.184422	97.0368	0.148965	0.532377	32.9566	26.7653	17.7365	17.2568	17.6557	28.9059	19.5413	14.0532	17.0707	17.3849	32.2028	26.0741	35.5294	61.5127	51.4925	0.212789	0.687751	0.163813	0.754185	32.4586	11.2127	20.5862	22.0343	16.1696	31.2688	37.7393	0.53525	71.7799	0.224312	16.8069	25.2164	0	0.579856	0.895062	3.6821	12.0606	0	0.010478	0.28393	0.8265	0.195393	0.244011	11.8532
JreChr01G13458	12.0876	11.1332	13.4959	0.971584	1.84204	2.04496	0.446993	0.423023	0.179502	0.127377	0.235663	0.254275	0.143302	0.38482	0.081951	1.32305	0.400192	0.445906	0.58012	0.617256	1.33529	0.709528	1.46231	0.692018	12.2389	1.61953	0.349839	0.205772	0.203358	0.723049	0.84422	0.954619	1.16195	0.556267	0	0.27585	11.2107	2.92618	2.4487	1.75914	0.557027	2.54346	1.59342	4.00399	1.36142	1.0168	10.7169	0.102542	turquoise
JreChr01G13465	50.9177	44.7032	34.9842	115.842	125.646	135.782	67.367	111.228	119.182	102.78	88.9537	49.011	113.61	97.4858	96.9025	109.138	109.1	103.259	115.465	166.616	228.018	177.107	206.302	185.899	43.5351	125.757	99.2591	80.2482	102.666	107.166	170.033	189.769	138.831	115.236	120.437	163.455	41.0438	38.1117	45.2703	23.4171	102.811	38.7848	31.3051	38.1759	40.4436	27.331	25.2008	119.07	blue
JreChr01G13467	18.1064	1.32245	16.1192	4.2605	6.21851	5.34674	5.31406	4.56167	5.7835	2.9395	1.96671	2.02352	2.83541	3.33408	3.03984	4.54815	4.49764	6.19761	3.35538	4.41624	6.72253	3.37785	3.1844	6.33434	11.8494	5.27525	5.21975	2.30991	3.06978	5.08113	4.83138	4.29886	7.24181	6.67633	1.1642	6.49021	7.46484	5.37727	6.35901	5.14707	6.39612	7.33622	6.14908	6.90129	3.09606	4.86214	18.1237	3.23844	turquoise
JreChr01G13474	14.0703	17.6648	13.7743	0.280941	0.477453	2.82356	0.248617	0.326164	0.159402	0.014623	0.091843	0.032224	0.01379	0.00995	0	0	0	0	0	0	0	0	0	0.019973	15.1698	1.19398	0.244728	0.04623	0.00791333	0	0	0.00665767	0	0.048507	0.016658	0.074469	2.73269	0.408511	0.0347797	0.0795357	0	0.376415	0.120706	0.242712	0.178038	0.029693	13.7871	0.025227	turquoise
JreChr01G13477	63.5049	40.7745	49.1164	24.1639	32.4764	32.2201	10.3609	19.4422	22.8473	21.8996	26.1455	24.3498	20.6909	24.6389	21.2785	35.752	26.1256	30.9798	46.4314	38.1268	48.9458	54.4345	47.3898	55.6823	51.1319	29.6201	17.5501	24.1316	22.2028	30.9525	44.5013	52.5022	60.505	57.832	26.3348	21.1705	60.2689	72.3331	86.2445	78.6962	90.0536	61.9412	89.5336	91.4494	94.3039	116.762	57.2082	16.0316	brown
JreChr01G13485	633.461	428.929	417.478	301.584	245.219	328.975	305.374	214.119	92.5823	159.763	120.542	126.368	144.84	169.769	146.071	94.6611	120.484	85.6829	191.403	157.972	284.657	168.165	173.591	160.975	493.289	291.926	204.025	135.558	153.56	100.276	211.344	167.577	271.487	302.552	151.988	306.981	143.014	158.267	76.7805	109.79	84.0252	51.3222	31.2959	30.4763	53.4071	54.9614	554.314	68.5835	turquoise
JreChr01G13487	8.24756	9.83964	9.54591	0.65214	0.673891	0.888839	0.006101	0.00269	0.001757	0.000882	0.005025	0.000909	0.001597	0.001151	0.002267	0.001816	0.001597	0.001461	0.000804	0.001095	0.000646	0.000954	0	0	9.21104	0.73829	0.003516	0.002272	0.00167167	0.00162467	0.000848333	0.000318	0.002761	0.354118	0.001836	0.001808	14.6501	11.7996	8.91744	7.6047	11.0335	20.1264	22.8341	17.2744	15.6357	12.5547	7.9578	0.000381667	turquoise
JreChr01G13490	106.444	75.4469	63.5529	17.1554	15.5783	18.7718	15.9068	24.3774	12.8778	43.4568	30.3628	38.715	32.1581	29.1213	32.7293	25.4109	22.1778	21.4032	139.596	38.7868	148.805	57.9863	51.1197	98.8208	81.8145	17.1685	17.7206	37.5116	31.3362	22.9973	109.062	69.3089	188.989	91.0903	78.2211	18.175	109.286	369.159	1355.57	474.611	542.585	48.3749	46.5488	41.0587	80.9748	27.2077	75.8577	20.715	brown
JreChr01G13493	29.5756	26.9479	35.6337	20.7087	20.5159	19.8513	22.2963	17.3765	22.7114	14.9926	11.0382	9.85553	8.25654	8.93184	10.5351	22.4906	13.225	17.4313	17.224	13.07	22.4102	20.3652	26.1304	35.5936	30.719	20.3586	20.7947	11.9621	9.24116	17.7156	17.5681	27.3631	19.0893	20.8461	18.0574	18.9889	29.3443	33.0265	39.4753	38.2837	48.9568	63.832	64.8667	76.3481	78.7571	66.8738	26.6754	17.5712	brown
JreChr01G13494	0.033482	0.009469	0.180701	0.01629	0.005591	0.059221	0.732034	0.014213	0.017465	6.33992	0.045259	1.1369	0.021506	0	0.002778	25.2692	2.61982	33.162	0.160674	0.000638	0.016088	0.405272	1.49584	2.49898	0.0745507	0.027034	0.254571	2.50736	0.00809467	20.3503	0.0591333	1.4667	1.43329	5.62422	0.283649	0.018873	41.8282	75.0112	40.5663	26.0837	11.4714	43.4795	41.1285	91.5688	98.988	62.8292	0.158436	1.07522	green
JreChr01G13497	65.4609	57.8545	79.3039	38.2688	30.742	36.7831	41.6128	37.0887	61.8069	17.3227	8.50112	9.8639	11.8612	14.3281	14.8698	6.89407	11.2482	6.2942	7.56633	7.66358	5.29651	8.79111	10.5276	7.61983	67.5398	35.2646	46.8361	11.8959	13.6864	8.14548	6.84214	8.97952	19.7377	31.6204	11.6027	40.1591	0.47283	0.718739	0.539945	0.844372	1.6954	0	0.000626333	0.021563	0.129443	0.0504047	70.2207	34.8578	turquoise
JreChr01G13505	7.95574	7.71861	6.78793	2.44997	2.10116	1.21671	0.05737	0.288372	0.058102	0.105326	0.051124	0	0	0	0	0	0	0	0	0	0	0	0	0	7.48743	1.92261	0.134615	0.05215	0	0	0	0	0	0.296424	0	1.51975	5.44487	0.182695	0.104226	0.140352	0	0.217458	0	0.130499	0.0702163	0.019894	6.34314	0	turquoise
JreChr01G13511	10.3795	10.1098	13.4855	14.7064	21.0336	12.4464	3.8155	6.75778	3.87347	3.50455	2.41417	2.78071	1.78289	2.01881	2.64706	2.22163	1.23835	2.07444	1.50848	3.37758	2.61877	0.598648	2.62567	0.964387	11.3249	16.0621	4.81558	2.89981	2.14959	1.84481	2.50161	1.39623	4.07196	5.38478	2.66865	10.7843	5.95402	3.25714	2.55433	3.5038	4.31779	2.2444	2.50451	2.0094	2.32921	4.21555	10.6436	4.12555	turquoise
JreChr01G13514	1.58703	6.83454	5.41522	3.13198	2.19595	2.5639	2.97033	2.65597	2.31714	2.65847	1.67108	1.23921	3.00343	1.50984	1.88662	4.78123	3.04076	4.52993	7.90471	6.17679	0.146552	10.3095	7.95643	11.1632	4.61226	2.63061	2.64781	1.85625	2.1333	4.11731	4.74268	9.80971	5.99233	5.69581	2.8118	3.9258	10.6538	5.78935	6.12083	9.73223	4.04976	12.2021	11.1478	13.1273	8.69566	9.11254	5.98499	2.434	blue
JreChr01G13516	12.3467	15.5982	14.059	3.89324	5.20838	3.98108	1.55893	1.29361	1.33713	2.66863	3.26848	2.95966	3.23689	3.05943	1.52176	1.11474	1.27961	1.27604	0.000688	0.000484	0.714638	0.786663	0.000724	0.081912	14.0013	4.3609	1.39656	2.96559	2.60602	1.22346	0.238603	0.289766	1.05793	1.76494	2.62209	1.97615	6.99335	2.60627	1.59177	8.027	3.50202	9.56237	19.8182	19.0999	22.2694	10.9271	9.31075	1.63206	turquoise
JreChr01G13519	10.2101	11.7435	11.3414	0.820752	0.863272	1.53558	2.59161	1.67979	1.27209	0.64697	0.167914	0.271773	0.702651	0.462778	0.084856	0.971682	1.02733	1.02919	0.435627	1.01048	0.768851	1.25269	1.12377	1.15088	11.0983	1.0732	1.84783	0.362219	0.416762	1.0094	0.738318	1.17578	0.014683	1.00568	0.192175	0.701478	9.67789	4.017	2.56026	3.38809	2.39758	8.07269	6.59348	6.62645	6.27219	5.42766	10.593	0.524469	turquoise
JreChr01G13520	42.6421	45.0569	48.5812	42.3308	45.7681	41.6252	28.6246	25.2767	24.2153	12.1456	12.8942	14.51	11.8092	13.1926	13.2541	16.4749	12.555	18.2525	18.5041	17.9204	19.2504	23.8111	21.1685	32.3975	45.4267	43.2414	26.0389	13.1833	12.752	15.7608	18.5583	25.7924	17.5344	0.858001	20.4426	26.5269	27.5896	26.789	27.1354	28.4325	41.2779	25.9901	29.2641	29.8283	33.5399	35.7359	40.9651	16.5301	turquoise
JreChr01G13521	0	0	0	0.21005	0	0	0	0	0.222538	2.99074	1.24853	0.788353	0	0	0.139735	19.8115	1.85908	27.8624	0.217904	0.923684	2.14811	0.9795	0.097916	0.621783	0	0.0700167	0.0741793	1.67587	0.0465783	16.511	1.09657	0.5664	1.64482	1.26674	0.347277	0.281546	0.354552	1.13661	1.02126	17.9597	9.88464	0.226262	0.042435	0.352496	0.913296	0.188435	1.43798	0.415126	green
JreChr01G13525	5.18625	6.41374	3.81155	0.001987	0.003531	0.110399	0.695726	0.397936	0.456144	0.001766	0.011016	0.002064	0.002548	0.795629	0.002692	1.0383	0.52962	0.720352	0.478791	0.150085	0.951321	1.38761	0.703969	1.82688	5.13718	0.038639	0.516602	0.00494867	0.266956	0.762757	0.526732	1.30615	0.003187	0.00276	0.196827	0.298311	15.002	4.18062	0.752533	1.47948	1.40882	2.72839	2.17449	3.85908	1.88443	1.28036	6.26831	0.00194733	turquoise
JreChr01G13529	90.3778	42.5981	54.752	0.224883	0.736549	0.570684	1.01187	1.36582	0.908377	3.91841	4.32188	6.54988	1.83648	0.898507	2.18921	4.02267	0.554309	6.40189	0.241913	0.722755	0.895035	0.605046	0.75648	0.033372	62.576	0.510705	1.09536	4.93006	1.6414	3.65962	0.619901	0.464966	1.92729	6.93721	0.643584	2.19041	29.2709	24.1027	14.2577	8.19793	87.476	8.91867	3.96874	5.78251	15.4106	1.86432	76.7058	0.625183	turquoise
JreChr01G13532	23.8963	24.79	23.9284	5.84987	6.97418	9.04092	2.66317	2.78979	2.76115	2.49263	2.81087	2.43423	3.30431	3.35495	2.61939	3.84612	3.01086	4.70638	1.48781	2.06327	1.19251	1.46654	1.88468	0.604931	24.2049	7.28832	2.73804	2.57924	3.09288	3.85445	1.5812	1.31872	3.34623	2.97178	1.63407	4.40384	21.7361	3.48868	1.60246	1.35466	1.05321	5.65118	1.13837	1.57029	2.91685	2.22594	19.4282	1.6244	turquoise
JreChr01G13543	12.9535	9.73262	8.1393	11.4089	5.7621	9.87508	4.1462	3.60535	4.8624	6.25354	5.38243	6.5712	5.75131	5.28111	9.95338	6.62666	11.7403	7.21981	22.0695	9.59155	22.1355	22.0655	37.498	18.1291	10.2751	9.01537	4.20465	6.06905	6.99527	8.52893	17.9322	25.8975	14.5519	17.9663	10.2575	7.1772	13.5008	26.7305	21.8766	22.7873	35.5328	14.6168	15.5173	10.4719	18.8253	10.1959	16.2341	3.64237	blue
JreChr01G13545	20.2345	17.1229	12.3399	18.3787	22.0751	24.0537	14.9554	13.4796	15.4965	7.69042	8.17972	9.47374	10.9992	10.8485	10.3199	13.8778	10.9399	11.7773	24.922	19.6048	28.949	38.1072	33.5514	63.6548	16.5658	21.5025	14.6438	8.44796	10.7226	12.1983	24.4919	45.1045	27.4584	20.0417	16.1967	17.7095	16.5768	30.2461	27.1817	22.3919	26.8389	15.4389	22.6059	21.7927	27.1862	24.1202	17.5662	7.69919	blue
JreChr01G13548	22.4403	29.1384	26.6731	11.1166	12.0111	12.5874	3.29816	4.61843	7.05244	9.58997	10.1401	9.61757	8.64837	7.74032	11.0318	8.45991	8.3015	8.88277	12.17	11.6164	14.158	6.34238	8.42595	9.94486	26.0839	11.905	4.98968	9.78255	9.14015	8.54806	12.6481	8.23773	6.96885	7.67831	7.68131	7.80052	9.07297	8.7536	15.5217	9.93443	9.77791	5.48922	6.0066	3.8266	7.03091	8.90691	25.8005	10.2214	turquoise
JreChr01G13559	5.80315	4.51831	9.80449	4.41821	6.87751	3.9722	1.32933	1.38539	2.05645	4.19526	4.80545	2.67747	1.07097	1.75985	1.30515	0.536482	0.040477	0.604063	0.681105	0.026222	0.00403	0.641599	0.290967	0.014573	6.70865	5.08931	1.59039	3.89273	1.37865	0.393674	0.237119	0.315713	2.17928	4.87244	1.34456	2.94567	53.8199	55.7287	33.3524	25.2149	5.25675	75.9659	48.4255	28.8083	22.7586	11.7817	5.26908	1.55715	turquoise
JreChr01G13567	0.219933	1.0137	0.359628	4.21349	0.691955	4.57409	10.2575	11.3042	8.41819	0.43102	5.16612	1.70719	5.64792	6.01278	1.20844	0.987602	1.77004	6.93877	0.241356	0.741637	0.29016	0.098155	0.268792	0.031131	0.531088	3.15984	9.99331	2.43478	4.28971	3.23214	0.424384	0.132693	1.46763	0.899179	5.3319	0.898809	0.0147387	0.0964653	0.0859177	0.200144	0.008188	0	0.0101817	0.0387737	0.0338297	0.0167463	1.34661	2.2321	red
JreChr01G13578	39.548	18.2381	19.26	1.23527	1.2599	4.03909	0.287499	0.183647	0.100092	0.598048	0.585936	1.22557	0.329715	0.206153	0.353705	3.20464	1.42675	0.786399	0.621897	0.405809	2.13817	1.91309	1.46105	2.325	25.682	2.17809	0.190413	0.803184	0.296524	1.80593	1.05529	1.89971	3.18565	3.68578	0.775229	0.678444	88.6309	93.6102	75.3467	144.428	91.1095	29.5984	36.5242	18.6135	24.2527	75.4003	34.907	0.323562	turquoise
JreChr01G13580	14.3211	16.2313	13.5868	1.71579	2.1981	2.63987	2.39778	1.49741	1.52057	0.910184	1.49151	1.35165	0.576811	0.913966	1.36447	1.32107	0.102539	1.76218	1.95185	0.928148	2.95138	1.1627	2.23906	1.62507	14.7131	2.18459	1.80526	1.25111	0.951748	1.06193	1.94379	1.67561	2.02882	3.08996	1.1678	1.50404	7.2402	22.3361	13.7494	14.3265	6.06256	33.5657	39.1387	40.22	48.2315	70.8336	10.1239	0.775856	turquoise
JreChr01G13581	9.22869	10.59	14.3796	9.5718	9.10275	14.0774	0.178951	2.92844	6.35587	6.55443	5.57538	7.53609	2.82069	6.22971	6.35734	5.78249	6.18503	4.94097	0.0056	1.75685	0.003762	0.002514	0.004898	0.016322	11.3994	10.9173	3.15442	6.5553	5.13591	5.63616	0.588737	0.00791133	0.566582	3.57818	7.2907	8.97588	1.42724	3.93936	2.61159	0.508716	0.007331	0.003452	0.00201667	0.403706	0.003886	0.00307833	14.1526	4.23446	yellow
JreChr01G13583	15.7427	45.5247	39.3299	11.99	11.8445	12.5123	8.43734	1.45948	6.26099	12.5966	12.3403	8.63864	7.93241	7.90728	11.4664	4.85251	6.20608	14.0472	0.340931	6.76876	6.32051	9.4399	0.144105	6.50431	33.5324	12.1156	5.38594	11.1918	9.10202	8.36859	4.47673	5.36277	0.12024	11.8359	10.2399	4.20442	2.49944	7.28895	8.39575	4.83858	6.14558	6.73764	3.17849	5.96372	7.60901	14.2694	5.21439	13.4257	turquoise
JreChr01G13585	68.6108	67.6187	65.0204	26.5686	23.5427	28.817	19.0474	19.2864	20.2323	12.3548	14.8987	12.0433	14.5802	11.7665	14.304	17.9615	14.4466	15.6131	17.4163	14.8218	16.7432	24.5911	19.7773	18.8669	67.0833	26.3094	19.522	13.0989	13.5502	16.0071	16.3271	21.0785	32.66	41.9391	17.8681	26.2746	18.0905	16.4397	16.618	19.0306	22.7798	14.7968	13.9866	17.1389	16.2475	8.78971	69.6056	13.3811	turquoise
JreChr01G13589	3.13429	65.6251	74.4874	0.305982	2.88667	21.9858	0.388238	0.97991	0.020742	0.568618	1.44046	3.59454	0.934224	1.60721	0.865491	5.44509	3.68692	6.23821	23.4267	10.5008	32.3818	80.3219	38.8685	100.76	47.7489	8.39281	0.462963	1.86787	1.13564	5.1234	22.1031	73.3168	218.477	63.4237	9.78239	0.424592	349.133	58.3507	3.50144	11.709	39.5116	270.195	70.7431	80.5484	12.3317	16.6668	100.559	0.459658	brown
JreChr01G13593	0.802047	2.19308	1.89055	0.004162	0.001402	0.000405	0.713361	0.59071	0.000915	1.47352	1.55683	1.02027	1.63911	0.95514	1.18376	22.8136	4.05739	30.735	6.01554	8.95138	13.5542	9.09549	11.0769	14.6242	1.62856	0.00198967	0.434995	1.35021	1.25934	19.202	9.50703	11.5989	3.39591	4.23599	0.653004	0.949634	86.1444	53.5442	15.0706	14.9585	11.0492	13.991	7.0119	11.1049	3.05833	1.04993	0.654892	1.41506	blue
JreChr01G13602	16.3267	17.1026	19.0578	8.3372	8.73648	8.90313	8.42694	6.19515	6.50551	3.98112	3.54755	4.10359	3.85814	4.20439	4.10788	4.87265	5.24292	6.90493	5.8033	4.7541	6.64112	5.25987	4.31871	9.03035	17.4957	8.65894	7.04253	3.87742	4.0568	5.6735	5.73284	6.20298	8.15018	7.86341	4.13206	6.87881	14.4911	7.2883	7.94132	5.76673	5.47898	4.42462	4.25833	4.38397	4.77512	5.43497	16.9383	5.96892	turquoise
JreChr01G13604	10.3034	9.96903	6.5427	0.023277	0.190841	0.62605	0.224955	0.212384	0.04745	0.021721	0	0	0.050303	0.01903	0	0.203944	0.194862	0.262978	1.34509	0.396606	1.44746	1.01498	0.607509	0.836757	8.93838	0.280056	0.161596	0.00724033	0.023111	0.220595	1.06305	0.819748	0.289087	0	0	0.022257	4.10452	0.519438	0.174941	0.342822	0.207299	0.447983	0.210848	0.465378	0.211314	0.033804	9.93236	0.009239	turquoise
JreChr01G13611	12.5844	16.7698	12.4832	5.64372	6.19112	10.5881	4.53574	2.25991	2.69862	1.72105	2.3911	1.12289	1.15821	1.21386	2.30502	2.40177	1.45407	2.15238	1.44165	1.91552	1.15206	1.17237	1.11546	1.18837	13.9458	7.47431	3.16476	1.74501	1.55903	2.00274	1.50308	1.15874	0.739818	2.01045	0.75235	3.29565	19.1868	10.3485	14.0307	13.9138	10.3074	19.9523	21.6049	17.5517	14.6907	20.8216	13.266	2.02592	turquoise
JreChr01G13619	0.063582	0.069379	0.08248	6.47631	4.41279	2.64235	6.82675	9.066	6.09711	1.90839	3.62692	0.927084	4.53098	2.93947	3.99703	0.09707	2.61356	0.121056	4.27818	1.39489	0.11603	2.74462	2.72997	2.52347	0.0718137	4.51048	7.32995	2.15413	3.8225	0.943897	1.9297	2.66602	2.48416	0.113822	6.46146	5.60178	5.80164	10.4639	7.39314	4.34756	7.34819	7.07976	3.52046	3.79005	2.46072	2.38012	9.529	1.05039	red
JreChr01G13639	22.6586	18.6625	16.6984	6.3447	6.53875	8.24143	5.82824	6.2119	5.48983	3.10825	2.93065	4.0425	4.66972	4.4598	4.91982	5.83375	6.15185	5.91571	7.20988	8.47918	9.02168	9.56338	11.9558	13.9398	19.3398	7.04163	5.84332	3.36047	4.68311	5.9671	8.23692	11.8196	8.10812	9.16839	4.44968	6.40541	16.6962	8.8674	5.32678	9.35792	9.64072	17.1681	14.0941	10.2104	9.4536	7.52207	17.1656	4.21786	turquoise
JreChr01G13640	0.176059	49.3152	3.21979	101.666	0.17742	43.8786	0.063832	2.00489	2.97842	31.1102	34.8313	35.2692	22.1291	9.33019	41.5031	30.8808	2.14568	59.4947	28.8452	35.8995	65.1708	35.8721	68.6876	126.066	17.5704	48.5739	1.68238	33.7369	24.3208	30.8404	43.3051	76.8752	3.8264	38.8384	53.9914	2.39826	52.2939	97.5257	52.4734	49.959	63.8048	27.0114	35.4593	81.8946	29.7567	24.4811	32.1408	8.9949	blue
JreChr01G13656	33.104	7.68868	28.7346	5.6748	2.07398	11.44	11.2204	6.76363	12.4044	2.90676	2.70417	1.83829	3.8798	2.69746	3.25659	6.72335	5.20531	7.08773	5.07584	6.72425	6.4689	1.09345	11.5591	10.2561	23.1758	6.39626	10.1295	2.48307	3.27795	6.33879	6.08966	7.63622	19.2663	14.8762	3.48457	6.67835	57.2606	33.0964	41.8981	18.6881	42.0378	70.3187	72.4142	127.782	39.452	77.356	28.253	7.05719	turquoise
JreChr01G13658	105.325	52.2289	80.0749	205.615	179.778	182.052	121.67	119.783	101.191	55.3337	34.4385	60.7074	61.2704	50.9191	56.823	62.6932	57.4228	63.3936	100.796	72.1508	70.9918	85.9009	100.817	136.982	79.2096	189.148	114.214	50.1599	56.3375	61.1699	81.3129	107.9	80.2916	95.8077	56.7191	137.603	0.390447	10.6083	20.0397	34.4443	68.7539	0.0458533	0.460749	0.231718	1.31914	0.783158	156.601	95.5106
JreChr01G13659	5.84978	5.42343	13.8286	26.8409	33.1605	36.0458	26.752	0.475745	23.4078	9.5547	8.56869	10.3465	13.527	7.81725	10.1581	0.387939	13.9616	0.531821	15.4693	5.5507	16.1434	0.442262	15.5812	24.1767	8.36726	32.0157	16.8785	9.48996	10.5008	4.96047	12.3878	13.4001	11.576	18.1671	16.2449	31.9689	8.08067	4.92767	4.99637	10.0091	6.01551	0.142304	0.36276	1.19346	0.698801	0.107805	14.2689	9.05941	green
JreChr01G13664	11.2671	11.5892	9.18084	1.72973	0.752321	1.22667	0.329014	0.243808	0.255476	0.203502	0.170307	0.506229	0.031305	0.045952	0.194788	0.175433	0.10822	0.102625	0.056338	0.01269	0.025604	0	0.111415	0.132215	10.679	1.23624	0.276099	0.293346	0.0906817	0.128759	0.031544	0.08121	0.564004	0.353279	0.119492	0.133998	30.9096	10.9606	4.99738	6.50463	1.59409	1.08386	0.0707183	0.079832	0.0842937	0.031213	5.91331	0.0920797	turquoise
JreChr01G13671	10.8176	9.01922	6.41507	5.35313	10.975	8.74026	3.30509	6.54961	5.46588	5.96039	7.00899	5.45372	7.45796	7.62234	7.46836	13.6747	10.3162	11.9623	12.9745	16.01	13.1445	24.978	17.2407	23.819	8.75063	8.35613	5.10686	6.14103	7.51622	11.9844	14.043	22.0126	11.7363	5.06137	6.55524	8.08053	11.2495	8.16639	7.27187	8.54366	10.9319	6.21026	7.01405	6.46181	5.12455	5.57555	7.8501	4.81648	blue
JreChr01G13676	27.8931	51.5217	46.5592	6.79361	16.5357	15.9033	9.09682	7.73761	8.04259	20.2093	26.8906	19.584	32.2662	37.124	34.0296	10.0545	26.7885	26.017	45.0516	40.5497	46.8698	56.2799	45.2497	52.0188	41.9913	13.0775	8.29234	22.228	34.4733	20.9533	44.157	51.1828	56.5552	38.3197	71.0497	3.13419	31.4031	77.2939	78.2238	52.9902	33.0364	51.9371	46.9181	12.3434	31.3185	53.8429	45.1916	37.378	blue
JreChr01G13677	0.001294	0.00026	0	0.00111	0.010687	0.001807	0.275692	0	0.002113	0.001806	0.013462	0.004958	0.002778	0.305051	0.002646	0.719931	0.665082	0.863409	5.88414	3.29406	5.78869	0.365366	8.84755	5.32328	0.000518	0.00453467	0.0926017	0.006742	0.103492	0.749474	4.98897	4.8454	1.80041	0.919157	1.40515	0.002803	0.394382	0.520151	1.24975	2.90999	7.62495	1.28864	2.76053	3.17414	3.37564	2.53919	0.00137433	0.161012	blue
JreChr01G13683	11.3017	11.5817	14.8142	4.20697	4.81166	4.5012	5.42414	3.34205	6.34324	0.971732	0.329202	0.230694	0.596624	0.294422	0.443899	0.500036	0.493469	0.914902	0	0	0	0	0	0.346095	12.5659	4.50661	5.03648	0.510543	0.444982	0.636136	0	0.115365	0.838735	0.937648	0.852789	0.774504	4.64654	0.306975	0.214113	0	0.00225133	1.58017	0.212996	0.754551	0.051971	0	7.9103	0.755019	turquoise
JreChr01G13685	13.369	10.8469	7.18905	4.21366	3.86029	5.08569	4.49097	5.77147	4.30167	2.20154	2.8441	2.16426	2.37048	2.62327	2.84734	4.05781	5.63397	4.25413	4.91028	3.78103	5.78782	7.27622	5.39745	2.42667	10.4683	4.38655	4.8547	2.4033	2.6137	4.64864	4.82637	5.03345	5.18319	6.59783	8.04263	10.085	6.87186	4.19328	8.10342	7.26835	6.02388	2.94728	3.23043	5.25585	4.01354	2.22022	8.40216	2.61426	turquoise
JreChr01G13686	2.24454	14.2394	14.2499	1.96464	1.60439	4.32968	0.643658	0.872732	1.13332	1.5696	1.4705	2.3483	0.835066	1.11784	1.1156	1.63868	1.11836	1.4144	0.948895	0.93988	0.691003	0.42876	0.746933	0.381906	10.2446	2.6329	0.883236	1.79613	1.02284	1.39048	0.859926	0.5192	1.22668	1.18174	0.412874	0.669832	7.15639	5.52049	1.19144	1.58867	1.32609	25.658	23.3071	12.0002	6.79316	8.81636	6.14331	1.02124	turquoise
JreChr01G13692	1.05728	0.009077	0.588779	1.11215	1.41849	0.728153	0.011514	0.016146	1.74234	1.64111	1.46403	1.6979	1.51157	0.005896	1.53581	3.13552	2.25073	3.01146	4.27737	3.62411	6.25295	4.71247	4.59746	4.63708	0.551712	1.08626	0.590001	1.60101	1.01776	2.79924	4.71815	4.64901	4.75387	1.33214	1.03108	2.58943	51.2247	11.3607	4.68215	4.96317	5.05989	3.10572	7.67809	10.8509	49.4307	82.9785	0.861435	2.39352	blue
JreChr01G13698	26.4855	19.5362	20.5477	13.6073	19.3791	16.3496	10.6977	12.2604	11.6314	12.7393	12.673	13.7881	11.7648	14.351	13.4897	19.8523	15.4791	21.3134	30.6134	21.6273	29.8386	45.4164	38.4087	42.1661	22.1898	16.4453	11.5298	13.0668	13.2018	18.8816	27.3598	41.9971	20.2103	19.4508	14.2819	16.5205	22.0222	11.8056	15.5809	18.0594	30.4307	37.7249	29.8726	35.0959	33.3395	25.6528	19.8328	9.62347	blue
JreChr01G13701	1394.93	2394.1	2618.08	1587.54	2044.77	1866.44	855.604	905.587	580.712	718.582	784.464	684.44	734.75	429.183	799.779	1110.61	830.724	1237.6	1500.35	1402.23	970.873	1702.54	1555.4	1633.2	2135.7	1832.92	780.634	729.162	654.571	1059.65	1291.15	1630.38	2014.55	2034.1	849.49	874.568	746.294	985.409	1150.32	825.611	808.748	843.847	1177.98	1168.65	1412.46	1142.69	2048.57	879.017	turquoise
JreChr01G13704	40.3988	44.8781	34.0131	15.4224	10.6419	18.2058	15.935	11.6585	14.2075	6.81596	5.67545	5.67154	6.98465	6.89703	5.56263	10.7641	8.96175	11.8223	13.636	12.7828	17.9711	16.6748	17.3528	22.4206	39.7633	14.7567	13.9337	6.05432	6.48144	10.5161	14.7966	18.8161	14.4038	14.6757	7.7371	8.43926	36.3203	31.6313	32.018	30.6108	39.4943	68.3408	55.711	57.4584	54.6686	43.4954	48.2005	9.71011	turquoise
JreChr01G13705	4.66608	4.8045	7.99429	3.9123	3.62805	4.64816	2.9929	3.00485	2.72372	1.07208	2.00948	1.15221	2.15753	1.53048	1.3023	1.8778	2.50207	0.116611	3.35356	2.37799	1.92616	4.90257	4.53609	4.96964	5.82162	4.06284	2.90716	1.41126	1.66344	1.49883	2.55257	4.80277	4.69255	4.09686	1.27815	2.8203	16.4169	16.7768	13.3032	24.4594	28.5204	10.5241	8.41067	10.0162	8.78933	10.7585	4.98634	1.28859	turquoise
JreChr01G13708	16.4924	8.83461	9.35021	2.9337	3.87738	6.00911	3.34366	2.77036	3.11917	1.78641	1.38979	1.14824	1.92807	1.46528	1.66199	5.32559	3.23117	6.05991	3.37024	1.41231	3.04254	3.05718	5.14877	3.67214	11.5591	4.2734	3.07773	1.44148	1.68511	4.87222	2.60837	3.95937	5.3051	3.29786	1.34472	4.34293	63.1277	40.4538	31.3144	35.9383	28.6963	47.0405	40.2623	41.7777	41.8201	46.4639	13.9309	0.90704	turquoise
JreChr01G13721	0	0	0.179278	0	0	0	0	0	0	0	0	0.203086	0.014684	24.7159	0	2.43913	36.871	17.1567	641.87	151.027	738.959	988.879	739.654	717.534	0.0597593	0	0	0.0676953	8.24353	18.8223	510.619	815.356	52.9166	0.065016	0	0	0	0	0	5.06592	52.6675	0	0	0	0	0	0	1.45258	blue
JreChr01G13725	7.11256	5.40172	4.61281	0.018746	0.26649	1.43973	0.011521	0.061752	0.024141	0	0.016277	0.008036	0	0	0	0	0.00409	0	0	0	0.014242	0	0	0.010029	5.70903	0.57499	0.0324713	0.00810433	0	0.00136333	0.00474733	0.003343	0	0	0	0.021001	3.05294	0.007937	0.0110647	0.006566	0	0.22092	0.0616477	0.05341	0.02001	0.00343167	7.01165	0.004834	turquoise
JreChr01G13728	5.64633	7.57439	8.41441	10.8715	13.3718	14.2618	5.79492	5.68803	6.3451	0.684806	2.17788	1.44962	1.64141	1.67319	1.88587	0.107835	2.63868	2.87441	2.61866	3.88868	2.64247	5.36019	1.99642	2.30773	7.21171	12.835	5.94268	1.43744	1.73349	1.87364	3.04994	3.22144	1.25187	1.58637	1.74369	10.4235	2.64872	0.727102	0.162893	0.706062	0.57495	1.97716	2.93278	2.04292	1.17751	0.379762	5.09085	1.54331	turquoise
JreChr01G13731	14.6908	12.0256	0.595814	0.769801	0.694642	3.95503	0.840903	18.4519	18.695	15.5043	13.8464	18.6966	12.2863	18.6359	0.530092	19.0025	24.6521	22.471	15.9623	0.500117	21.5334	22.207	18.2792	17.173	9.10408	1.80649	12.6626	16.0158	10.4841	22.0418	12.6653	19.2197	19.0742	14.1748	13.5421	1.04785	9.43489	9.65501	20.2784	31.5706	15.8831	15.0214	15.9728	25.3827	9.01445	3.26896	15.0677	12.4981	blue
JreChr01G13734	8.20211	1.24851	2.48752	0.51376	3.21699	0.476611	7.4562	5.78587	4.02868	20.6058	26.5446	13.6313	35.8436	36.312	39.2124	33.4958	33.9177	33.7398	94.4243	75.654	124.651	146.399	153.273	212.422	3.97938	1.40245	5.75692	20.2606	37.1227	33.7178	98.2433	170.698	26.6786	27.555	13.2923	15.8384	0.288211	0.275849	2.57904	13.3013	44.9244	0.000800667	0.00924567	0.016998	0.000797667	0.0172523	0.947749	55.2411	blue
JreChr01G13735	10.6004	9.77412	12.9133	7.10288	8.77872	5.1109	1.15203	1.14202	0.668393	0.974683	0.775989	0.701402	1.14527	0.728569	0.517215	1.15986	0.661526	1.19816	1.43446	0.994711	1.14543	1.77994	2.75667	2.23263	11.096	6.9975	0.987482	0.817358	0.797017	1.00651	1.19153	2.25641	5.20575	5.72007	1.67484	2.71662	35.5068	36.2948	7.59618	12.3841	6.34461	43.3425	58.4225	71.8593	40.5919	27.5124	10.6588	0.634445	turquoise
JreChr01G13740	30.6662	27.0677	29.1402	13.1727	12.5812	13.7756	10.044	7.91744	10.9746	13.1313	10.3384	11.9951	10.5876	10.0506	10.3556	16.864	10.1582	16.3605	6.64501	11.1403	8.56695	6.03699	5.6017	4.64838	28.958	13.1765	9.64537	11.8216	10.3313	14.4609	8.78409	5.42902	12.7155	14.2268	12.76	9.80234	37.6547	36.211	36.5159	45.2158	36.532	28.8826	27.7054	32.6452	37.6119	35.5877	27.2479	6.37568	turquoise
JreChr01G13745	0.01017	0.104625	0.027385	2.02184	1.36941	1.10356	4.97998	5.80133	7.04878	6.06418	5.14988	5.38833	5.22476	2.52843	6.57783	15.3381	10.0861	13.6203	5.84424	8.46605	6.09974	10.97	7.0047	10.9356	0.0473933	1.49827	5.94336	5.53413	4.77701	13.0148	6.80334	9.63676	9.94486	9.85007	6.84762	6.91464	87.7027	66.0176	51.1235	21.8562	25.5214	11.0963	7.08971	11.8112	10.3017	27.2997	0.295084	12.6842	green
JreChr01G13761	25.7454	28.4919	18.1374	16.7326	14.367	10.3747	7.33469	6.51483	8.29245	5.97439	4.80579	6.84911	4.33974	4.10296	3.84389	3.99681	3.35053	3.17315	4.41102	4.74906	2.5948	1.30517	2.15635	0.023013	24.1249	13.8248	7.38066	5.87643	4.09553	3.50683	3.91829	1.16151	8.09685	16.9798	3.72339	8.31572	17.0531	5.21485	2.38008	1.88981	1.45801	7.46737	2.96564	6.73784	2.71302	1.19897	21.2166	4.47588	turquoise
JreChr01G13766	0.328278	3.35117	4.94421	0.710608	0.848865	1.39729	0.3354	0.039991	0.813278	0.616964	0.044331	0.373002	0.163669	0.043043	0.112697	0.712897	0.141863	0.086776	0.082382	0.139563	0.0678	0.123336	0.027851	0.077397	2.87455	0.985588	0.396223	0.344766	0.10647	0.313845	0.0965817	0.0761947	0.358993	0.020258	0.183063	1.37445	0.140498	0.0305007	0.0830613	0.065822	0.0508423	0.070668	0.008205	0.0534423	0.137927	0.100382	2.06924	0.334263	turquoise
JreChr01G13777	9.19234	12.0835	8.64395	0.183483	10.8082	11.4186	0.085389	4.36026	4.11162	2.29615	3.53691	4.62569	5.24992	6.57496	2.98225	10.9587	6.69135	5.51446	13.9375	16.1556	17.3973	16.0202	11.4652	22.3356	9.97325	7.4701	2.85242	3.48625	4.93571	7.72149	15.8301	16.607	1.11615	10.3721	5.08412	7.87943	3.45003	11.7949	8.67638	14.6402	20.1028	11.5096	17.4158	9.27704	8.25502	13.8812	3.33186	3.85013	blue
JreChr01G13780	1.56646	0.066571	0.996696	0.682627	0.067481	0.330565	0.850054	0.147217	0.153243	1.26719	0.485344	0.900162	0.243905	0.334273	0.759297	0.521756	0.193972	0.563232	1.80564	1.72521	1.87093	6.41678	1.95535	3.0382	0.876574	0.360224	0.383505	0.884233	0.445825	0.42632	1.80059	3.80344	9.56496	5.65572	0.906815	0.881006	0.832936	3.17243	2.00917	0.52676	6.69028	0.00316367	0.06887	0.757711	0.382946	0.0266347	0.989912	0.528725	blue
JreChr01G13790	1.81429	2.75746	6.22385	1.3753	1.11869	0.535654	0.532195	0.841534	0.74666	0.304361	0.520874	0.349886	0.578701	0.842469	0.544091	0.812461	0.853866	0.849671	0.54803	1.38661	1.21597	3.57345	0.996062	1.3285	3.59853	1.00988	0.706796	0.391707	0.655087	0.838666	1.0502	1.966	5.30367	2.08563	0.907914	0.922068	8.97161	3.39689	1.86303	1.97915	1.23137	3.60723	3.06954	2.10606	3.01203	2.34807	1.80188	0.64177	turquoise
JreChr01G13818	2.22941	2.90594	3.16991	4.53763	5.30577	3.61167	2.87975	2.65025	2.81717	3.82309	2.84404	4.30039	4.44701	3.52104	3.48581	4.66636	2.50012	5.49591	7.83839	8.54297	8.13531	12.2315	10.6471	15.2337	2.76842	4.48503	2.78239	3.65584	3.81795	4.22079	8.17222	12.7041	5.14436	5.56653	5.44419	4.88425	4.37361	5.11173	12.3956	10.4061	25.4083	6.34714	11.0572	8.90251	8.29204	4.37213	2.35944	3.97569	blue
JreChr01G13820	340.881	312.773	316.249	8.64065	36.5424	36.7551	1.28388	2.14949	1.40061	0.478515	1.05327	0.758497	0.676832	1.38681	0.274826	0.660648	0.598071	0.711996	0.4616	1.12509	0.136157	0.124879	0.418831	0.003729	323.301	27.3127	1.61133	0.763428	0.77949	0.656905	0.574284	0.18248	4.31156	1.58129	1.38893	4.31337	100.111	5.91066	1.57999	0.703141	0.00532167	392.538	309.446	255.307	89.7672	42.5985	339.08	0.728127	turquoise
JreChr01G13821	8.45533	8.61475	5.632	3.20876	2.05487	0.662908	2.12287	1.62682	2.05857	1.98182	1.60342	1.87467	1.95044	1.77293	1.41315	6.39144	3.99179	5.11288	2.50908	4.17478	1.42966	0.150487	0.058624	2.41651	7.56736	1.97551	1.93609	1.81997	1.71218	5.16537	2.7045	0.875206	3.72533	1.42654	1.0263	3.93523	65.4983	9.52539	2.1564	19.802	20.308	0.879115	1.53442	10.3067	9.69196	18.322	9.56805	0.560422	turquoise
JreChr01G13824	30.5437	23.596	13.0914	1.87972	1.76311	1.84061	1.27571	1.76995	1.73988	0.980481	0.521951	0.750073	0.865099	0.538697	1.44854	3.47769	2.19522	3.9643	1.69918	1.48468	1.80081	2.17254	1.8193	0.692123	22.4104	1.82781	1.59518	0.750835	0.950778	3.2124	1.66155	1.56132	7.85372	7.23138	0.831964	2.73667	22.3564	0.368274	0.709893	0.886813	0.536605	0.463459	0.662128	0.963916	0.41345	0.255453	17.2294	0.345682	turquoise
JreChr01G13826	17.8892	16.2044	13.8227	18.5438	19.5027	15.6982	14.4817	13.8983	16.9441	12.595	12.6504	13.846	14.3664	9.25635	11.2528	17.6086	17.6222	17.8002	37.541	26.9861	28.0662	36.1745	33.2284	45.781	15.9721	17.9149	15.108	13.0304	11.6252	17.677	30.8644	38.3946	33.3774	26.8603	18.3329	20.0174	11.8674	22.7222	25.2739	43.6741	65.9615	18.9043	28.7031	29.9702	44.0964	34.9985	24.9304	20.7451	blue
JreChr01G13828	22.0812	18.0635	22.1822	14.5873	15.1196	21.3327	9.3859	12.3195	5.40913	0.246024	1.03538	1.45557	0.686149	0.616361	0.830197	5.75569	5.61286	5.61241	3.88082	4.17063	4.38138	6.64438	8.1283	0.702091	20.7756	17.0132	9.03818	0.912325	0.710902	5.66032	4.14428	5.15826	3.3758	1.54332	3.97912	11.8975	5.06768	1.04334	3.29418	9.35098	8.21855	1.42801	2.18042	4.79376	1.9772	1.24952	24.548	3.13129	turquoise
JreChr01G13830	4.63147	2.72561	3.42226	0.280785	0.002208	0.635078	0.525193	0.366921	0.001709	0.001748	0.000368	0.001173	0.002382	0.001421	0.001524	0.001902	0.001293	0.002472	0	0.233027	0	0.00076	0.001758	0.000976	3.59311	0.306024	0.297941	0.00109633	0.00177567	0.001889	0.0776757	0.00116467	0.002519	0.002589	0.002867	0.281104	3.03438	9.4314	4.94136	3.09166	1.19974	17.4334	15.4668	12.3887	12.8004	10.2589	4.62823	0.0610983	turquoise
JreChr01G13831	15.2229	14.3478	17.618	32.5377	40.7077	38.5702	14.4629	14.6148	8.74593	14.4558	12.9191	14.3011	9.57664	13.309	8.57814	13.2739	12.7975	13.2508	10.4811	11.4949	11.3728	15.2549	12.3848	5.57379	15.7296	37.2719	12.6079	13.892	10.4879	13.1074	11.1163	11.0711	9.3041	6.86659	9.19879	39.0047	7.83012	4.11191	6.51631	4.85994	9.11745	5.89641	6.65032	6.12602	6.50699	5.93404	15.5425	7.93171	yellow
JreChr01G13832	14.5044	7.11519	0.212905	0.196438	24.4555	16.6889	35.0466	19.1198	9.22182	1.55252	4.4415	4.06739	4.56101	2.06132	1.43285	2.0195	3.19233	7.63748	3.97227	3.83702	4.73831	5.48602	6.3641	7.01307	7.27751	13.7803	21.1294	3.3538	2.68506	4.28311	4.18254	6.28773	8.32645	10.2382	2.67649	1.05234	10.7541	16.7645	9.66945	10.0998	12.5618	13.6866	12.2188	5.50675	4.45376	8.43829	16.14	4.57657	yellow
JreChr01G13863	12.5806	8.44745	9.9872	7.01026	7.04758	8.92874	5.55073	4.93144	5.72707	2.0939	2.56599	2.17763	5.17579	2.78069	5.3278	7.13673	4.32678	7.45236	4.53617	4.15417	5.85446	6.88647	5.20402	3.23807	10.3384	7.66219	5.40308	2.27918	4.42809	6.30529	4.84826	5.10952	6.65675	4.74509	3.50105	4.72953	16.2396	8.67521	7.64169	8.37999	5.82124	15.8866	10.014	17.7159	10.8399	10.5474	9.53016	2.86772	turquoise
JreChr01G13865	101.986	89.4796	107.788	44.6192	49.9017	54.4749	63.6581	53.3234	36.6493	62.8921	30.6693	62.7663	59.0666	55.6602	53.3125	91.0018	66.9736	87.2413	82.7853	45.7994	79.7624	111.106	108.239	171.362	99.7511	49.6652	51.2103	52.1093	56.0131	81.7389	69.449	130.235	94.7401	80.3499	75.857	49.531	118.642	216.881	254.685	256.696	137.512	209.591	253.345	295.685	317.478	191.558	97.5083	63.1226	brown
JreChr01G13866	35.5517	38.8664	38.6813	17.599	22.6715	19.0133	12.3128	14.4843	11.9487	13.493	10.7846	12.6865	10.7521	12.2745	11.4389	16.3312	14.5192	15.9529	12.3068	12.8842	13.1366	8.49616	5.60777	2.91001	37.6998	19.7613	12.9153	12.3214	11.4885	15.6011	12.7759	5.67131	13.774	18.4941	20.4347	18.2284	64.1242	45.8357	46.3186	48.2094	13.5247	23.7828	15.7685	25.2771	32.2875	28.3797	38.0764	15.2433	turquoise
JreChr01G13876	4.00968	4.78684	5.74117	20.0599	12.6082	14.5693	9.69824	14.215	14.6859	19.162	16.2799	18.5065	24.7117	25.7846	31.2133	21.9826	36.8216	27.8775	33.2441	32.1276	32.2711	27.8918	32.7982	37.5328	4.8459	15.7458	12.8664	17.9828	27.2365	28.8939	32.5476	32.7409	14.6784	60.7302	26.3135	25.7537	4.67373	8.50482	10.2221	11.71	20.1692	3.43629	5.7855	4.55539	6.13321	3.49001	5.35964	13.2891	blue
JreChr01G13896	17.4628	14.0544	11.99	12.5265	10.4693	14.1727	8.46805	6.23216	5.60537	5.92952	6.09838	3.6965	4.88824	4.8496	5.06114	8.49496	4.40747	6.92469	7.96835	8.60607	5.86449	6.99344	7.50538	6.96659	14.5024	12.3895	6.76853	5.24147	4.93299	6.60904	7.47963	7.15514	7.79878	11.2989	6.90936	8.4147	21.8432	9.13055	5.63197	6.85939	7.09623	14.6285	17.2293	13.5254	15.2452	15.3551	18.372	5.27259	turquoise
JreChr01G13897	25.2848	20.2571	25.6481	8.72883	12.2354	12.4736	5.40983	5.64586	10.0823	6.65237	7.55142	5.62425	8.7362	8.54406	5.55435	8.73516	9.13745	7.15752	10.6548	10.8364	13.4007	16.3943	15.0904	16.6338	23.73	11.1459	7.04601	6.60935	7.61154	8.34338	11.6307	16.0395	12.3827	15.2975	8.40806	13.2854	18.7278	19.5934	21.6331	13.2732	13.4499	17.366	16.1993	16.2679	14.8258	16.045	21.5949	8.02743	turquoise
JreChr01G13901	204.802	209.419	248.878	229.251	339.026	249.86	134.411	172.709	175.164	237.2	301.12	261.36	242.747	267.393	213.306	131.142	205.742	149.907	385.513	282.343	399.505	552.872	567.728	454.228	221.033	272.712	160.761	266.56	241.149	162.264	355.787	524.943	605.81	504.981	237.159	284.405	110.817	286.76	314.83	213.364	294.09	89.1056	162.243	128.953	152.917	174.774	190.407	255.093	blue
JreChr01G13908	2.86362	2.99072	3.34505	13.5786	1.47675	14.3537	21.9772	17.0107	13.6156	14.8581	18.1161	14.9835	14.3116	17.997	17.5834	16.9919	17.318	16.6197	21.1818	9.44757	19.276	16.4424	18.3975	10.8561	3.06646	9.80301	17.5345	15.9859	16.6306	16.9765	16.6351	15.232	29.3111	21.6204	6.3081	15.9785	14.4503	11.2277	11.5727	12.5779	10.8696	5.70782	5.8623	7.78051	5.85369	4.33445	2.27189	11.7224	green
JreChr01G13910	120.142	84.8642	108.389	54.7084	41.598	60.7605	50.1924	41.3229	44.8703	29.5593	29.9257	24.8472	25.3022	25.9451	26.3705	54.8665	38.2001	54.4417	68.0413	48.0611	73.0722	62.7357	57.2633	104.769	104.465	52.3557	45.4619	28.1107	25.8726	49.1694	63.0582	74.9225	51.4477	49.8752	30.0687	31.6991	98.0002	84.2246	83.2698	88.3693	68.4721	125.17	139.487	143.242	154.93	144.341	123.616	33.9245	turquoise
JreChr01G13914	9.76543	11.9625	7.89357	2.00474	1.36749	3.78517	2.67578	1.53696	2.56871	1.44002	0.716839	0.890312	0.936075	1.51931	0.611494	1.89582	0.065913	1.27975	0.169181	0.099246	1.26316	1.46032	1.70338	1.0867	9.87382	2.3858	2.26048	1.01572	1.02229	1.0805	0.510529	1.4168	1.90046	2.54684	1.79882	2.02515	6.18332	9.49937	11.9576	17.0171	15.1507	9.22657	8.76456	11.7419	12.2751	11.9371	13.2175	1.11922	turquoise
JreChr01G13915	44.4247	39.3471	38.48	31.1298	30.7538	26.5266	35.4332	35.0978	41.6035	19.168	22.5389	15.4548	22.0819	19.0621	17.7231	59.9546	45.236	54.0045	42.1084	49.5968	38.0844	49.6456	42.935	70.8158	40.7506	29.47	37.3782	19.0539	19.6224	53.0651	43.2632	54.4655	57.915	43.9054	10.7238	30.5765	40.9454	19.2196	18.4675	32.8031	22.8848	26.1192	21.7575	29.9897	15.4981	21.5861	51.5879	17.7304	blue
JreChr01G13930	0.004973	0	0.029018	0.006332	0.01255	0.01421	0.040968	0.011991	0.014235	0.020507	0.610366	0.515194	0.100424	0.589506	0.040242	7.21344	0.969757	9.85159	10.488	3.412	10.329	3.84042	8.49244	5.22091	0.0113303	0.0110307	0.022398	0.382022	0.243391	6.01159	8.07635	5.85126	0.0344	0.040707	0.033615	0.023749	0.188252	0.10719	0.0455033	1.71828	2.36949	0.0518323	0.045067	0.150427	0.0540893	0.03912	0.254482	0.180159	blue
JreChr01G13943	5.52735	6.09423	5.1971	2.47645	4.65044	2.05231	3.59661	2.99957	2.99604	2.32173	3.15698	2.42319	1.96298	1.75283	1.8639	3.52174	3.39674	3.3515	3.74772	2.94439	4.23752	8.48408	5.26053	6.5515	5.60623	3.05973	3.19741	2.63397	1.85991	3.42332	3.64321	6.76537	8.47758	5.36134	3.14094	6.64037	8.72294	7.12079	6.65391	5.66381	5.47502	5.74632	6.42437	7.6382	5.58672	6.21144	3.35544	2.94124	brown
JreChr01G13946	0.19068	0.205886	0.216688	0.126803	1.12749	0.528119	0.742744	0.710641	0.480683	0.571605	0.557448	0.86292	1.17693	0.401337	0.403477	1.09587	1.09022	1.03735	3.32377	1.51686	3.37434	4.3227	3.74726	2.59607	0.204418	0.594137	0.644689	0.663991	0.66058	1.07448	2.73833	3.55534	1.07962	0.414073	0.438928	1.30456	10.9583	4.61142	5.93159	7.40485	4.29709	61.3831	33.1046	26.9677	17.8381	11.2236	1.79347	0.59583	blue
JreChr01G13948	49.213	38.4097	32.7866	20.8112	21.5488	32.4009	15.7504	12.7375	11.4879	12.9726	10.5015	13.7423	15.1337	15.1935	12.8407	21.3057	14.2186	22.111	19.036	14.4315	19.1434	18.8118	19.9475	20.2689	40.1365	24.9203	13.3253	12.4055	14.3893	19.2118	17.537	19.6761	9.55795	15.1746	11.8406	21.9942	59.4825	52.6652	51.6986	44.1225	58.7661	58.2592	43.3389	45.9405	39.8584	29.1536	45.3602	12.1803	turquoise
JreChr01G13956	104.602	92.7779	93.5249	188.698	130.462	119.334	103.324	59.7219	304.989	158.789	356.583	249.682	117.203	155.063	159.476	464.228	286.156	398.849	305.24	1.68908	278.585	212.058	207.68	211.815	96.9682	146.165	156.012	255.018	143.914	383.078	195.171	210.518	570.848	192.471	176.049	128.046	545.875	1227.89	1319.44	1081.67	821.576	333.059	419.101	354.458	375.786	443.152	97.5381	112.985	green
JreChr01G13957	76.0095	59.6091	56.946	17.4228	25.1383	27.4361	14.9218	10.9245	8.76211	21.657	15.5801	16.5399	17.7912	18.4734	18.8165	67.7503	41.0183	59.7808	59.9828	64.5957	73.3032	52.1903	56.4857	74.0293	64.1882	23.3324	11.5361	17.9257	18.3604	56.1831	65.9606	60.9018	54.2849	43.708	7.16591	12.1739	328.34	144.592	40.5984	27.73	23.547	105.67	67.3756	74.2686	63.5003	66.1836	37.2424	16.875	brown
JreChr01G13961	40.014	0.249926	28.6671	406.807	356.05	251.371	250.66	287.375	207.594	241.852	245.532	238.421	162.893	236.277	158.727	145.826	210.675	169.305	632.16	368.428	618.327	600.52	640.109	717.347	22.977	338.076	248.543	241.935	185.966	175.269	539.638	652.659	647.482	779.402	307.355	345.759	4.26056	43.3257	192.587	187.732	597.316	0.510331	0.49825	1.25756	0.960763	0.640437	12.9757	364.751	blue
JreChr01G13963	20.5784	11.5648	11.0774	26.3269	25.5954	17.5718	21.5684	23.3944	37.4662	23.7037	16.1819	20.4515	25.4889	28.5717	21.4232	67.5375	45.3289	82.2241	27.1429	45.2055	30.3415	24.4386	24.1867	17.2926	14.4069	23.1647	27.4764	20.1123	25.1613	65.0302	34.2299	21.9726	23.4774	25.111	14.5763	31.3479	6.90825	9.18391	7.48922	12.3634	10.8213	2.82269	2.49227	6.46553	3.50415	1.24358	21.3285	28.9407	green
JreChr01G13973	1.40708	0.514762	1.05777	2.72681	5.03643	2.77277	2.51783	2.69029	2.89987	7.05707	4.97451	4.8958	4.72854	4.47308	4.35749	11.3482	8.13913	14.6735	10.2779	9.25308	10.9885	8.7372	6.75211	11.9363	0.993205	3.512	2.70266	5.64246	4.5197	11.3869	10.1732	9.14186	4.62346	5.87368	7.37529	6.03401	4.17203	5.41542	7.5005	6.21467	8.105	8.58338	7.96164	6.68437	8.78396	11.214	0.920071	3.96691	green
JreChr01G13975	150.508	116.998	164.886	160.869	147.657	146.428	141.341	112.408	101.993	93.1584	81.8808	82.5407	84.7693	83.4608	84.5539	82.724	79.5264	84.1194	50.0134	67.2295	63.2368	42.4684	48.0636	46.8013	144.131	151.651	118.581	85.86	84.2613	82.1233	60.1599	45.7778	121.8	152.488	125.258	124.28	180.222	244.213	249.739	207.366	107.071	198.051	204.572	194.099	195.18	204.012	132.607	81.2739	yellow
JreChr01G13983	187.883	174.195	347.505	10.1627	20.2572	39.5178	4.53213	4.41476	3.10994	1.02879	1.53054	0.948856	0.8548	1.2294	0.384946	2.28509	0.950244	1.21356	0.378452	0.71539	0.315966	0.20786	0.311125	2.15629	236.528	23.3126	4.01894	1.1694	0.823048	1.48297	0.469936	0.891757	3.88093	2.64989	1.02274	5.13828	102.441	23.843	5.66506	8.88837	2.4545	147.381	51.2994	45.6397	33.9851	12.7063	218.352	0.225618	turquoise
JreChr01G14000	7.18148	7.26879	10.0032	29.5468	37.1776	19.7141	23.5232	13.1888	11.7261	6.58601	7.2689	8.31454	11.275	10.0031	7.10529	9.54025	14.0165	9.74295	8.99825	10.2863	10.686	11.4768	18.8362	8.75299	8.15117	28.8128	16.146	7.38982	9.46112	11.0999	9.99016	13.022	8.24885	10.0329	8.93212	23.398	6.93313	8.56828	9.75036	8.81123	10.585	3.63914	9.0978	8.74763	6.50568	6.32376	11.0203	8.66677
JreChr01G14021	3.84714	4.1265	4.06933	0.293391	0.963835	0.882217	0.042465	0.024561	0.115731	0.065561	0.029262	0.112399	0	0	0	0	0	0	0	0	0	0	0	0	4.01432	0.713148	0.060919	0.069074	0	0	0	0	0.440565	0.046087	0	0.053743	0.259364	0.306073	0.0276323	0.0428373	0.0948167	0.0124227	0.0112207	0	0.0168967	0.054909	5.24049	0.039686	turquoise
JreChr01G14022	23.9135	23.3066	24.4032	15.006	16.3233	15.8036	11.33	13.3552	11.2365	4.71849	5.76373	7.55798	3.69663	3.09699	6.54647	7.2158	5.99404	7.95028	4.901	4.82061	5.15844	8.69471	8.93234	9.15207	23.8744	15.711	11.9739	6.0134	4.4467	7.05337	4.96002	8.92637	7.239	11.424	12.4493	16.4288	17.3182	19.458	19.3288	18.1516	13.5577	22.4479	17.7912	23.1833	20.6153	20.4297	20.1776	6.2286	turquoise
JreChr01G14027	1.23191	1.06319	1.16524	3.37046	0.476108	1.70196	7.90707	6.36045	4.46734	5.50394	4.57907	4.78476	9.42553	8.24111	7.86651	16.9148	13.728	14.1532	20.0983	18.4275	17.6072	26.4662	18.0667	46.9549	1.15344	1.84951	6.24495	4.95592	8.51105	14.932	18.711	30.4959	13.9312	14.6293	5.66864	2.62337	15.1757	11.3341	3.70741	23.4079	86.0468	19.067	13.4879	14.2126	12.468	15.6893	1.52795	7.93599	blue
JreChr01G14034	3.10213	4.89511	4.11918	0.006854	0.070147	0.633913	0.113516	0.049825	0.020236	0.139962	0.005353	0.013661	0.005509	0.114919	0.011261	0.015398	0.018168	0.005552	0.030892	0.004875	0.003802	0.086059	0.007868	0.006926	4.03881	0.236971	0.0611923	0.052992	0.0438963	0.0130393	0.0131897	0.0336177	0.006141	0.133672	0.004407	0.004485	5.60518	0.295693	0.240088	0.140136	0.00589733	0.800805	1.10369	0.52682	0.0950253	0.0419113	0.704669	0.013284	turquoise
JreChr01G14036	7.63039	5.80374	5.43048	2.00404	1.93315	2.33552	1.82	2.3304	0.926048	0.451739	0.961986	0.663219	1.15367	0.019051	1.02002	0.090551	0.220654	0.011379	0.008051	0.443829	0.003025	0.00132	0.000855	0.004547	6.2882	2.0909	1.69215	0.692315	0.730914	0.107528	0.151635	0.00224067	1.70523	2.61943	0.170597	2.27631	15.053	32.5491	38.0427	36.8106	18.0678	66.1439	84.5407	53.4784	58.4383	42.8123	6.26276	0.409552	turquoise
JreChr01G14040	16.1006	12.524	12.5935	7.76115	6.36458	7.08735	4.80948	4.82655	3.04409	2.98999	3.09825	4.94538	3.56086	4.17474	3.64779	3.65153	3.90497	3.75738	10.7902	7.76839	10.1855	16.6302	12.9982	15.0359	13.7394	7.07103	4.22671	3.67788	3.79447	3.77129	9.58135	14.8881	17.6101	12.5637	9.51205	5.95084	23.8051	6.24008	12.6167	14.191	27.5162	24.2697	48.4124	42.3595	71.8633	74.0824	10.9971	3.11847	brown
JreChr02G10002	66.3242	91.7645	61.5103	28.0546	39.1617	38.4238	29.473	27.2091	28.3197	21.4317	23.0973	23.0084	29.387	30.091	26.506	39.6966	40.7984	41.9282	39.3919	32.4646	30.3435	41.4365	42.3679	35.6461	73.1997	35.2134	28.3339	22.5124	28.6614	40.8077	34.0667	39.8168	26.1671	41.1776	23.8239	34.749	42.8186	30.895	23.2665	27.1426	50.0504	34.5173	36.5174	35.3176	28.7915	26.2661	54.254	29.3207	turquoise
JreChr02G10018	7.90136	0.390545	8.81504	0.263899	1.13138	1.02344	0.041603	0.263763	3.68159	0.74602	1.26724	0.434426	0.850331	0.914751	0.669538	0.302998	0.198239	0.497309	1.49329	0.765032	0.033703	1.24223	0.548412	0.489581	5.70232	0.806242	1.32899	0.815894	0.81154	0.332849	0.764009	0.760073	7.85004	0.480049	7.50063	0.372257	0.571595	0.367668	0.333834	0.9796	1.02817	3.9096	0.734814	3.21768	0.977664	0.691587	0.947314	2.40346	turquoise
JreChr02G10019	5.58851	7.74723	5.23218	0.946221	1.15424	1.08105	0.915535	0.885592	0.649631	0.411545	0.099262	0.481499	0.395033	0.10226	0.200584	0.680497	0.199425	0.466227	0.505099	0.444007	1.38645	0.948509	1.10896	1.12408	6.18931	1.0605	0.816919	0.330769	0.232626	0.448716	0.778518	1.06052	2.0176	1.59639	0.170743	1.59597	25.2554	16.7058	12.4655	1.49245	0.404188	14.0412	11.5355	11.9023	8.22011	11.2041	5.76823	0.05164	turquoise
JreChr02G10058	10.2052	17.258	20.9707	9.61175	11.1151	11.0286	10.4312	11.5801	7.43371	3.24813	2.99618	1.87135	3.05681	3.63173	4.59799	8.08754	6.98384	6.57985	4.84395	6.89639	6.97958	5.11853	7.73172	6.78213	16.1446	10.5852	9.815	2.70522	3.76218	7.21708	6.23997	6.54412	5.71947	11.2596	4.46908	8.19374	20.7214	18.7434	15.0315	20.1644	14.8059	23.8887	16.0112	17.4811	18.3111	16.5857	13.3212	4.63951	turquoise
JreChr02G10059	54.7292	65.8117	56.3166	3.57907	7.43947	13.4053	3.03904	3.51313	1.94129	0.420144	0.723553	0.421162	0.289347	0.544292	0.621688	0.438416	0.016287	0.008695	0.011802	0.000819	0.275997	0.00395	0.004542	0.011816	58.9525	8.14128	2.83115	0.52162	0.485109	0.154466	0.096206	0.00676933	2.43322	0.026362	0.01948	1.46284	72.5525	10.5258	4.8309	7.26907	2.05445	105.335	55.5827	68.4588	81.5333	103.91	62.9122	0.0146457	turquoise
JreChr02G10071	18.3209	14.8933	16.0422	11.7241	2.80362	15.4676	9.03581	13.2756	14.7635	4.73599	5.33449	7.23421	7.28878	8.79205	6.7794	10.264	9.92116	10.5367	13.134	8.51585	8.55491	12.0745	10.0529	14.2822	16.4188	9.99844	12.3583	5.76823	7.62008	10.2406	10.0683	12.1365	8.3392	9.76394	11.511	16.9209	17.1972	21.0442	15.4077	15.6374	11.9224	8.82103	11.7342	12.781	10.0727	7.90326	17.2598	9.38969	turquoise
JreChr02G10077	6.04832	5.45265	6.92878	3.60272	3.82225	4.6766	1.01441	0.928969	5.49697	0.50792	1.1752	2.03537	2.81624	2.38698	2.90913	4.49804	4.89885	4.65282	5.87609	5.03481	7.35101	6.12255	5.62232	12.9456	6.14325	4.03386	2.48012	1.2395	2.70411	4.68324	6.08731	8.23017	3.83672	4.15236	0.93638	1.99072	6.56949	7.5172	4.04533	5.29007	6.33668	8.00592	8.63418	7.28188	8.16715	5.08427	6.59119	3.46176	brown
JreChr02G10078	7.70446	6.59186	8.43944	6.16734	6.60237	6.0147	11.4137	11.5053	10.0479	4.1261	3.62183	5.33174	6.44731	6.84404	6.39052	13.2476	10.7421	13.817	13.0914	11.896	12.8416	17.9454	17.0573	24.4185	7.57859	6.26147	10.989	4.35989	6.56062	12.6023	12.6097	19.8071	11.7704	13.0422	10.1037	11.0841	11.9675	26.8747	31.5301	42.6488	25.6822	16.4135	26.0012	20.3021	22.6409	19.6163	8.02184	8.2515	blue
JreChr02G10085	19.1646	24.2692	13.2797	1.36794	1.59842	2.42861	1.78648	0.333499	2.21173	7.88441	6.73206	8.3263	5.75495	2.91453	10.5724	4.27288	3.16355	6.20426	11.1981	4.49099	10.2508	17.7058	14.794	15.5714	18.9045	1.79833	1.4439	7.64759	6.41397	4.5469	8.64665	16.0238	16.953	20.6317	33.9645	5.35141	32.9509	38.6729	45.4794	38.3427	34.4052	57.6647	31.2385	36.1592	35.2209	62.2781	30.3817	4.88108	brown
JreChr02G10088	30.7249	33.1271	36.4741	21.6955	21.2633	27.8787	32.9538	23.9569	34.5988	14.9839	13.9893	15.1135	18.2409	18.3729	20.0308	20.2674	16.4544	15.1026	4.89894	10.7951	4.1819	3.76605	4.22067	6.37822	33.442	23.6125	30.5032	14.6956	18.8815	17.2748	6.62532	4.78831	5.81305	10.2379	24.0065	25.6556	13.7123	15.9064	12.6923	16.0396	14.4546	26.7757	14.4475	19.9591	17.0885	16.8861	37.2957	21.9985	yellow
JreChr02G10089	189.682	110.316	169.417	20.1099	55.9384	30.6893	25.2731	22.8479	19.4504	11.4696	12.4789	10.9494	7.53517	9.2815	8.53576	9.79635	7.96266	10.439	7.04122	9.10202	7.15667	3.36433	5.73197	3.98455	156.472	35.5792	22.5238	11.6326	8.45081	9.39934	7.76664	4.36029	29.229	24.6381	14.9454	25.373	57.2574	22.3201	15.4746	16.5576	11.9139	122.104	67.373	59.6993	60.2831	61.152	150.458	14.1835	turquoise
JreChr02G10115	5.69408	4.76722	4.07	0.286302	0.266779	0.880866	0.180388	0.034655	0.290497	0.434157	0.392531	0.619571	0.347344	0.284799	0.610112	0.595075	0.706825	0.796091	1.15459	0.418096	1.22734	1.10979	1.47074	1.93852	4.84377	0.477982	0.168513	0.482086	0.414085	0.69933	0.93334	1.50635	0.639599	0.365594	3.88218	0.506298	16.9177	3.79612	1.75684	1.66654	2.56052	3.90769	1.23476	1.53161	0.833253	0.554273	3.46785	0.304468	turquoise
JreChr02G10119	3.20638	2.31374	3.38233	0.923942	1.72613	0.917083	0.907078	0.040289	0.587023	0.010169	0.663462	0.177671	0.064351	0.081935	0.12828	0.059864	0.053073	0.095106	0.064705	0.083146	0.217181	0.132879	0.087729	0.097694	2.96749	1.18905	0.511463	0.283767	0.091522	0.0693477	0.121677	0.106101	0.002337	0.03543	0.643469	4.33181	0.576839	0.782931	0.708209	0.477746	0.110749	0.229183	0.371364	0.0689287	0.456554	0.453519	1.92944	0.629617	turquoise
JreChr02G10122	14.8028	6.60305	10.341	4.83479	6.37064	3.94278	0.061804	0.361631	0.525737	0.524683	0.657094	0.145087	0.494115	0.333558	0.060401	0.118578	0.151622	0.067159	0.061143	0.106376	0	0	0	0	10.5823	5.0494	0.316391	0.442288	0.296025	0.112453	0.0558397	0	1.08561	0.014525	0.053229	2.44073	0.282062	0.303001	0.064798	0.181694	0.159059	0	0	0.0288327	0	0.119316	10.3115	0.0521463	turquoise
JreChr02G10123	0.215196	0	0	0.054174	0.159657	0.144816	0.359614	0.41658	0.780424	0.112802	0	0	1.01239	1.00679	0.832658	0.779858	0.551664	0.453775	2.20531	1.26511	6.02375	11.7392	11.7234	94.3869	0.071732	0.119549	0.518873	0.0376007	0.950612	0.595099	3.16473	39.2832	1.68555	6.238	1.18654	0	0.0583343	0.200575	1.40745	0.639737	0.741859	0.090236	0.024213	0.0264507	0.061709	0.0653773	0.0156553	1.63747	blue
JreChr02G10136	43.614	55.3838	47.368	24.3082	22.6238	29.106	25.4555	19.3309	20.7101	14.0547	28.1024	23.0085	20.7385	19.4047	14.9724	35.4299	27.5139	45.876	78.7254	50.1007	56.1491	135.981	97.1709	50.5085	48.7886	25.346	21.8321	21.7219	18.3719	36.2733	61.6584	94.5533	147.853	109.607	19.0179	34.1772	86.8828	79.6654	54.5782	50.1198	60.7325	24.2186	28.1113	30.9232	37.033	34.388	44.1931	15.0328	blue
JreChr02G10149	22.3652	27.0862	31.4729	7.71086	7.32755	7.55691	8.48147	6.90991	9.45454	6.78531	6.88465	8.79518	7.4462	6.57498	5.11708	6.97907	8.71649	9.17803	9.4917	5.56017	8.72452	10.8868	10.721	15.3042	26.9748	7.53177	8.28197	7.48838	6.37942	8.2912	7.92547	12.304	9.22339	9.20841	5.47955	11.2169	13.1511	15.5383	15.8424	15.3225	15.9993	12.2494	8.58994	12.2908	9.91865	10.8946	20.1988	9.37829	turquoise
JreChr02G10156	14.7	12.4285	11.3715	2.25895	3.80206	4.94024	4.16918	2.72556	1.97307	0.965686	1.09016	0.127695	1.39599	1.48942	1.46357	2.36479	2.27465	1.75852	4.28252	2.65891	4.22134	3.61861	5.15339	7.52625	12.8333	3.66708	2.95594	0.727846	1.44966	2.13265	3.72092	5.43275	4.27162	2.33872	1.84048	3.75101	8.98174	6.27752	4.48495	13.9047	8.97601	23.0259	37.3217	50.0084	63.3261	52.7085	14.3465	1.23964	turquoise
JreChr02G10158	11.7162	16.7023	10.741	5.82415	9.33837	6.81701	7.91351	7.09826	8.07086	3.48755	2.98744	3.01215	2.06879	2.50003	3.01096	6.07409	3.54693	4.21542	3.52016	3.72289	4.6327	4.38707	4.00408	4.15148	13.0532	7.32651	7.69421	3.16238	2.52659	4.61215	3.95858	4.18088	8.33498	6.37753	3.29471	5.21423	6.81069	8.60754	13.5352	11.0505	8.30339	9.02702	8.19106	8.64734	8.59626	6.08796	14.6188	4.83955	turquoise
JreChr02G10159	5.61075	6.63062	5.6336	8.32405	4.54191	6.55155	4.5739	3.7798	3.87681	1.13829	1.46253	1.89135	0.833817	0.569655	0.095892	1.73927	1.08574	1.48206	1.64115	2.17217	1.59209	1.20598	1.42686	0.878102	5.95832	6.4725	4.07684	1.49739	0.499788	1.43569	1.8018	1.17031	4.92751	4.4585	1.30535	4.9087	1.46867	3.65805	2.78983	3.0134	2.53421	9.27526	3.95161	2.85274	18.8481	11.7369	9.05536	3.48709	turquoise
JreChr02G10174	5.21337	7.55288	6.38463	3.66493	3.76564	3.89839	4.45863	3.6204	3.1115	3.50641	3.63218	3.64626	2.78169	2.98817	1.72663	3.74942	4.87309	6.80137	8.61433	6.2987	9.45923	11.7967	10.8074	9.75753	6.38363	3.77632	3.73018	3.59495	2.49883	5.14129	8.12409	10.7872	0.062379	7.45228	3.19934	5.207	22.0185	19.5862	15.1202	14.1019	12.2091	15.3088	14.2135	16.3951	11.4458	17.4627	4.49987	3.4115	blue
JreChr02G10191	310.565	316.058	285.407	53.9941	56.3307	78.8211	78.9855	71.8482	70.8584	30.494	34.3565	32.6338	54.9225	63.8556	62.7231	79.9045	73.8152	78.9534	80.539	54.5444	62.5032	80.5602	100.537	143.762	304.01	63.0486	73.8974	32.4948	60.5004	77.5577	65.8622	108.286	75.7694	85.7897	65.3184	70.1742	250.768	196.864	142.832	150.555	128.434	172.782	131.431	176.055	127.391	108.757	277.123	38.6883	turquoise
JreChr02G10193	120.173	137.9	239.551	1235.86	839.41	968.103	1138.59	1110.66	910.241	783.922	610.066	692.855	1121.22	937.197	1072.12	1813.78	1398.25	1597.47	1317.39	1504.12	1307.63	1571.31	1575.69	2571.4	165.875	1014.46	1053.17	695.614	1043.51	1603.17	1376.38	1906.13	1014.69	1347.18	1144.83	977.519	0	37.508	119.82	459.363	1025.84	0	0.00375833	0.0259117	1.90776	2.43525	194.254	883.776	blue
JreChr02G10210	8.44141	14.7597	17.9732	938.103	440.257	427.793	755.089	772.622	1011.9	2821.43	1934.28	2194.93	2237.18	1333.88	1914.85	2850.42	1808.43	2786.18	1180.28	2702.69	571.167	530.608	512.849	2108.11	13.7247	602.051	846.537	2316.88	1828.64	2481.67	1484.71	1050.52	472.316	796.683	656.899	860.994	6.54767	187.064	623.567	1032.56	259.201	0.0633163	0.323614	0.346734	0.60057	1.5772	7.39914	4262.29	green
JreChr02G10216	33.7523	35.2169	28.5853	27.2064	33.3572	29.9982	17.4177	18.0708	17.223	13.6886	14.0485	12.8374	16.7748	13.9678	12.9872	23.223	22.0487	24.159	33.1803	27.4758	31.3995	43.3502	34.7756	27.6677	32.5181	30.1873	17.5705	13.5248	14.5766	23.1436	30.6852	35.2645	23.2844	28.78	18.0568	26.8914	29.3367	26.6461	32.0026	31.8938	42.0177	32.0666	36.313	33.0463	23.6496	41.6867	30.6846	14.822	brown
JreChr02G10236	11.7866	7.76202	10.4993	75.9859	65.7654	65.363	83.1663	100.782	90.117	107.252	78.2638	104.473	62.2181	61.8858	49.9071	163.94	120.489	151.307	131.838	114.07	134.048	98.1555	122.937	221.065	10.016	69.0381	91.355	96.663	58.0037	145.246	126.652	147.386	61.8098	49.3288	152.442	93.6031	75.303	148.587	80.7444	182.482	209.874	35.3731	46.7851	73.0666	85.7128	57.6167	14.9535	162.74	blue
JreChr02G10240	1.60274	2.18792	3.35779	42.3452	55.6712	63.0888	2.35604	175.089	0.350192	29.5048	485.018	0.534917	68.5422	171.715	1.4823	89.8926	266.965	109	0.484904	0.334293	1.53586	3.65984	0.365617	265.221	2.38282	53.7017	59.2649	171.686	80.5797	155.286	0.785019	89.7487	0.399421	0.318429	0.507898	0.187363	0.88512	7.76703	47.9737	19.1282	91.1186	0	0.0415283	0	0	0	2.34626	18.9897	green
JreChr02G10242	12.3819	11.4075	11.3359	5.27554	7.16529	5.98855	5.93737	4.04362	5.87095	3.36559	3.42604	4.23044	3.86333	5.18712	4.55634	4.83802	5.91003	4.79831	11.1834	8.13179	8.59398	17.9234	16.6503	21.8307	11.7085	6.14313	5.28398	3.67402	4.5356	5.18212	9.30307	18.8015	11.7523	11.4035	5.63476	6.58514	6.19483	4.86145	9.05023	7.64623	11.9369	12.5425	8.5851	9.11011	9.9867	8.17627	10.3489	5.69777	blue
JreChr02G10246	50.0713	52.6972	52.6087	17.2608	18.8858	24.0667	19.5403	16.2951	13.7423	9.88046	12.1864	10.1862	10.5261	11.2224	10.8227	21.158	12.8851	17.7101	12.3212	13.3524	13.5065	12.6826	11.3333	19.7866	51.7924	20.0711	16.5259	10.751	10.8571	17.2511	13.06	14.6008	15.2288	14.0192	14.0051	16.175	36.3484	27.021	24.0176	25.2067	23.7351	43.5254	32.0974	42.7947	43.5352	48.2035	57.1031	8.50057	turquoise
JreChr02G10249	6.83423	2.51659	1.87224	1.1327	1.57067	2.10643	1.15065	0.260993	2.16565	4.57161	2.7913	5.36507	3.92318	3.46738	3.62116	18.3676	8.38314	9.85714	22.7146	19.9431	39.3782	28.569	26.9873	19.7257	3.74102	1.60327	1.19243	4.24266	3.67057	12.2026	27.3453	25.094	39.004	19.4497	3.02504	2.949	83.8248	45.557	68.5975	94.14	143.645	37.301	38.8429	31.1205	27.5701	61.109	8.9723	3.41749	blue
JreChr02G10259	10.1128	12.5926	12.9692	6.77837	8.85221	8.88823	6.22864	6.55245	5.21133	6.33128	3.9705	4.41099	3.71675	3.34069	4.40254	4.208	4.58437	6.50241	1.9753	3.73605	2.47186	4.09594	2.46905	3.27639	11.8916	8.17294	5.99747	4.90426	3.82	5.09826	2.72774	3.28046	4.16598	4.58773	4.04293	7.59819	5.04105	6.57206	5.7141	5.20787	4.29956	4.04943	3.41054	5.45056	2.6615	2.92204	14.4381	5.12928	turquoise
JreChr02G10263	11.5396	9.03708	5.73715	1.07686	1.91171	1.61013	0.445241	0.402786	0.647911	0.187061	0.568924	0.000292	0.628074	0.60399	0.544384	0.727554	0.091267	0.917262	0.664427	0.786633	0.905667	1.13476	0.865878	2.38138	8.77129	1.5329	0.498646	0.252092	0.592149	0.578694	0.785576	1.46067	0.01264	0.825885	0.000325	0.559063	3.85039	2.10622	2.10332	2.83858	2.02597	3.57433	1.85071	2.74552	2.57671	1.47356	7.67835	0.0810257	turquoise
JreChr02G10268	0.269264	36.9646	38.1791	36.1048	22.4157	25.5877	7.98959	19.2158	12.5184	6.77888	8.50293	7.52011	7.59689	5.20103	5.48416	12.2333	5.60848	14.8436	5.07489	8.15407	5.9417	11.0932	7.21995	11.7212	25.1376	28.036	13.2413	7.60064	6.09403	10.8951	6.39022	10.0114	6.99918	6.12293	7.83892	14.8341	32.6123	30.9402	19.8666	32.0549	18.8357	27.106	23.6156	25.0849	21.6445	22.4755	43.4287	3.66265	turquoise
JreChr02G10275	769.305	783.77	500.775	166.298	207.72	285.675	161.845	141.682	177.127	83.1476	0.149368	91.816	132.312	144.679	117.609	228.282	162.718	221.527	163.573	134.099	159.411	152.587	211.373	218.578	684.616	219.898	160.218	58.371	131.533	204.176	152.361	194.18	169.192	166.329	144.658	124.377	774.683	412.518	291.019	248.479	267.714	596.825	445.818	444.403	315.762	357.616	746.006	52.3422	turquoise
JreChr02G10290	343.134	294.015	263.385	56.3355	67.4653	88.863	83.2368	34.9807	65.2898	35.1804	28.6183	34.3846	42.0541	52.2766	45.5737	54.9291	63.2038	65.9919	59.0834	53.0481	91.3089	101.379	111.007	98.4848	300.178	70.8879	61.1691	32.7278	46.6348	61.375	67.8135	103.624	84.5191	69.737	63.7935	59.3471	192.247	113.134	85.6742	49.4716	98.4686	168.59	132.022	162.163	106.927	120.466	307.001	45.8924	turquoise
JreChr02G10292	36.1101	31.9448	32.3219	19.2197	22.9055	23.1024	18.9335	21.4397	21.7384	11.3774	11.1265	12.4846	16.5829	26.5634	12.1862	27.4031	19.3798	30.8137	23.1031	26.552	27.3789	18.2628	18.999	22.0701	33.4589	21.7425	20.7038	11.6628	18.4442	25.8656	25.678	19.7773	14.2588	14.7485	15.6613	17.5185	66.3816	38.9646	36.5144	28.9821	25.6151	39.6106	42.6205	41.0662	41.4611	45.8051	30.9163	12.6549	turquoise
JreChr02G10299	0.013454	0	0	0.056293	0.013481	0.050579	0.014749	0	0.014937	0.469026	0.43584	0.548749	0.249319	0.349047	0.260503	3.83869	0.414217	7.89314	0.080324	0.109095	0.480045	0	0.072263	0	0.00448467	0.0401177	0.00989533	0.484538	0.28629	4.04868	0.223155	0.0240877	0.452161	0.221452	0.758672	0.261084	0.256817	0.033108	0.138857	0.2958	0.413355	0	0.0223907	0.0163567	0.0516037	0	0.00423867	0.21664	green
JreChr02G10301	44.6778	42.0741	39.7551	11.1617	18.6706	12.4045	18.0791	10.0244	9.36606	5.7755	4.01253	5.95174	4.48189	7.40111	5.47138	11.9114	6.09155	12.9977	7.63248	7.50768	4.91005	3.19377	3.82611	13.9707	42.169	14.0789	12.4898	5.24659	5.78479	10.3336	6.6834	6.99687	5.60192	7.47073	9.97176	9.43936	51.0971	32.7216	31.7055	30.207	32.6753	54.9582	39.0138	39.9565	43.2037	39.5558	45.9963	6.35964	turquoise
JreChr02G10310	74.2403	22.0942	56.0732	25.4313	28.8051	37.863	12.9763	13.975	21.8278	8.5768	6.8804	10.3158	11.6524	9.12818	10.0732	9.81143	7.61504	12.3432	7.94885	9.54429	11.8714	23.3059	15.0238	15.8487	50.8026	30.6998	16.2597	8.59099	10.2846	9.92323	9.78818	18.0595	11.5062	10.3764	13.0612	22.6508	23.2607	22.3456	20.3413	10.1846	16.7961	29.7447	21.4238	26.3744	21.9793	16.6087	62.25	11.037	turquoise
JreChr02G10315	3.43034	2.5143	3.8301	3.70191	2.19013	3.94495	1.28809	1.31231	3.49923	1.48242	1.84082	2.27043	2.0969	1.08758	2.00972	2.79828	1.22957	3.71194	3.98048	3.29122	2.75843	4.58958	5.74941	11.9878	3.25825	3.279	2.03321	1.86456	1.7314	2.57993	3.34337	7.44227	3.06975	2.74724	4.49434	1.6598	9.41489	12.5239	14.1196	8.8742	13.7706	2.64019	4.61	4.28173	4.51252	3.98891	4.51641	1.66375	blue
JreChr02G10316	27.2291	20.526	24.2582	16.1171	17.0678	18.5524	19.5349	18.8973	21.4909	16.2759	17.3836	21.0656	12.6912	13.5882	14.479	5.73584	9.34292	7.81581	13.6883	14.574	17.532	20.0328	12.8527	19.9751	24.0044	17.2458	19.9744	18.2417	13.5861	7.63152	15.2648	17.6202	23.597	31.803	19.5864	19.8597	17.7255	11.7358	11.0394	8.82943	12.2781	17.9211	12.5761	13.4107	9.6487	8.1047	24.6142	21.0688	turquoise
JreChr02G10318	12.5491	12.7463	12.6485	3.92336	3.9425	4.85529	2.9926	2.43149	1.83801	0.908134	1.12094	1.04494	0.771931	0.687606	0.026404	0.847444	0.59575	0.717631	0.009447	0.011301	0.424637	0.013885	0.522064	0.014328	12.6479	4.24039	2.4207	1.02467	0.495314	0.720275	0.148462	0.183426	2.091	1.66335	0.014631	2.41223	23.2178	8.8404	7.76466	5.3475	2.18596	7.33381	7.22289	5.98941	5.20023	3.20573	10.4677	0.199197	turquoise
JreChr02G10322	92.6076	51.1738	66.0634	34.5635	43.9616	55.5607	11.3162	13.4719	5.00904	17.273	14.0591	18.4635	16.7079	12.4313	12.2312	11.4285	14.2661	8.33224	33.0418	28.7242	29.3685	38.8417	45.0244	48.3323	69.9483	44.6953	9.93238	16.5985	13.7901	11.3423	30.3782	44.0661	52.496	45.7883	28.4097	42.5542	58.5332	42.2339	40.2509	64.3829	105.242	41.7829	38.8306	39.9152	45.243	40.4741	87.0437	18.4269	turquoise
JreChr02G10329	4.67981	0.072682	1.19315	2.94213	3.4058	2.97566	1.00084	1.00864	0.702576	0.154267	0.064211	1.78724	1.92588	2.29905	2.01221	3.25368	3.86746	3.75704	17.6533	7.67039	14.1968	17.8375	14.1157	0.18708	1.98188	3.10787	0.90402	0.668571	2.07904	3.62606	13.1735	10.7134	4.55665	5.68036	4.70378	5.65037	9.96525	2.97979	2.85811	3.67739	7.38469	1.12539	1.31092	1.47029	2.10455	1.57445	3.40514	2.37526	blue
JreChr02G10332	11.9167	12.0366	14.6392	3.8076	3.38167	5.14762	5.04661	4.58835	5.47424	2.36737	1.55085	2.15509	1.73179	2.60638	2.17461	3.84151	1.99961	4.15642	2.68705	1.72547	3.40885	3.44743	4.47322	3.62556	12.8642	4.1123	5.0364	2.02444	2.17093	3.33251	2.60712	3.84873	3.92642	3.34337	2.86791	2.75515	40.3759	46.2922	30.205	35.1034	22.5713	35.3467	36.4255	43.2511	33.7672	20.3417	14.5725	1.79256	turquoise
JreChr02G10333	25.0891	23.1593	20.2217	6.18944	5.88294	10.1467	4.64197	2.98251	4.76827	4.06539	4.41217	3.89117	5.32208	5.01715	3.7591	6.80241	6.04975	7.38134	11.9264	11.8232	7.76068	10.4146	14.5982	12.3086	22.8233	7.40636	4.13092	4.12291	4.69944	6.7445	10.5034	12.4405	16.5783	13.4508	5.59048	5.32309	19.2689	17.3145	21.7346	16.7539	18.5785	20.0788	26.5598	27.1191	27.0051	21.1804	21.1689	3.49951	turquoise
JreChr02G10342	11.485	14.704	27.5511	54.5896	51.8507	55.522	35.0942	39.223	31.9303	10.9173	6.79581	12.0788	7.66199	5.46026	9.97065	12.4269	8.90744	12.7038	4.91585	7.80761	9.9887	12.1092	5.33116	8.08388	17.9134	53.9874	35.4158	9.93064	7.69764	11.346	7.57072	8.50806	9.14083	10.6933	11.255	41.78	9.14224	10.4772	9.82594	9.11169	9.75767	2.53297	6.71	7.70215	6.85305	10.6599	15.1662	18.1127	yellow
JreChr02G10344	12.3427	13.4053	14.265	5.06683	4.00347	6.03393	5.47481	5.26938	5.15962	3.03938	2.86375	2.55949	2.19974	3.80672	2.98594	4.55536	3.06034	3.70421	5.02343	4.30905	4.14978	9.21567	6.89157	5.89962	13.3377	5.03474	5.30127	2.82087	2.99747	3.7733	4.49409	7.33562	10.2264	8.11244	3.92869	6.24211	8.96997	8.70067	8.4075	7.4411	8.92188	11.4208	9.55098	13.4349	8.55916	8.83977	11.9741	4.42181	turquoise
JreChr02G10355	11.9526	11.4327	10.6308	0.585661	0.394564	1.27387	0.019211	0.039564	0.132233	0.223815	0.098556	0.058159	0.169385	0.030642	0.07466	0.107824	0.029177	0.018144	0	0	0.049756	0.059325	0	0.000647	11.3387	0.751365	0.0636693	0.126843	0.0915623	0.051715	0.0165853	0.0199907	0.129908	0.261346	0.092277	0.149118	9.78579	1.82729	0.51387	0.773872	0.0198503	2.35596	0.191046	0.435826	0.0612833	0.047039	9.74283	0.141163	turquoise
JreChr02G10360	4.58158	5.10703	3.52571	1.15952	1.67999	1.50564	0.531312	0.790028	0.641896	0.178446	0.006431	0.014969	0.01488	0.004113	0.101906	0.013322	0.205185	0.296354	0.794959	0.014432	0.0039	0.006484	0.008222	0.012933	4.40477	1.44838	0.654412	0.0666153	0.0402997	0.17162	0.271097	0.009213	0.035676	0.006437	0.016419	1.00033	6.34984	6.04423	3.4108	2.12905	0.498235	10.7817	17.1628	19.7321	6.57935	3.32258	2.96462	0.017732	turquoise
JreChr02G10361	5.40799	3.0318	4.69003	2.03941	3.22725	3.34405	0.035449	0.010401	0.234561	0.001742	0	0	0	0.004477	0	0.004328	0	0	0	0	0	0	0.011856	0	4.37661	2.87023	0.0934703	0.000580667	0.00149233	0.00144267	0	0.003952	0.017274	0.004511	0.005236	2.70131	30.7614	33.4168	3.78231	0.233335	1.24543	43.0212	23.2811	4.81852	4.48077	0.0381693	3.42991	0.00411233	turquoise
JreChr02G10368	11.3416	3.47987	5.00609	0.483852	0.133754	0.785698	0.242169	0	0	0.131179	0.0113	0.007259	0.250649	0.090197	0.129675	0.002881	0.125245	0	0.111937	0	0.070455	0.320656	0.022444	0.042064	6.60919	0.467768	0.080723	0.0499127	0.15684	0.0427087	0.0607973	0.128388	0.119389	0.092364	0.002142	0.515115	13.8645	2.63791	3.76481	5.60515	14.7842	9.88544	5.89298	11.1468	8.91342	5.93675	5.0646	0.145853	turquoise
JreChr02G10369	3.94216	4.54624	4.28731	1.7008	1.81329	1.70854	0.977332	2.35837	0.625582	1.8263	1.91569	0.575124	2.04405	2.1984	1.30453	0.962096	0.816682	0.911148	0.231909	0.580515	0.040412	0.005226	0.002605	0.006707	4.25857	1.74088	1.32043	1.43904	1.84899	0.896642	0.284279	0.004846	0.00498	0.005391	0.740278	2.40777	2.18937	4.22611	3.42933	2.73368	0.776616	3.11483	2.00381	1.96572	1.55508	1.11474	4.24108	1.18103	turquoise
JreChr02G10376	26.724	44.777	21.0918	9.12491	8.31856	25.2205	11.7571	4.67485	6.39444	0.561994	0.788518	0.154653	3.47931	3.63475	1.66533	0.071137	1.09093	0.122652	0	0	0	0	0	0.053809	30.8643	14.2213	7.60879	0.501722	2.92646	0.42824	0	0.0179363	0.230946	1.13635	1.23849	19.6815	53.9248	31.2172	2.32338	4.32097	5.9823	56.1429	47.8197	50.1161	42.7015	30.998	36.0781	3.25798	turquoise
JreChr02G10378	5.04642	0.140126	0.145668	39.4737	38.2592	43.1281	63.0916	48.9932	54.0567	22.6166	27.6703	30.2081	3.36442	8.37509	24.3448	23.7332	22.2187	2.47645	21.6078	22.9053	2.17199	32.1573	30.0928	21.2336	1.7774	40.287	55.3805	26.8316	12.0281	16.1428	15.5617	27.8279	62.4612	8.10765	3.4514	39.8154	31.5887	34.5759	30.8728	19.5449	15.1489	21.5109	25.6702	26.5465	16.6582	15.8272	40.7086	29.66	red
JreChr02G10383	8.31213	13.0501	8.69125	3.62395	5.85789	5.60335	6.30215	6.23278	3.43477	4.98394	2.50176	4.38023	3.19045	3.91843	3.09509	9.38074	5.37572	9.54873	15.6218	13.3204	12.42	23.592	17.7234	8.03525	10.0178	5.0284	5.32323	3.95531	3.40132	8.10173	13.7874	16.4502	26.3685	18.4194	9.17971	3.25137	33.8837	15.3288	14.8432	22.5212	38.6007	13.6486	5.58236	8.98499	6.05475	4.55608	9.5129	6.36305	blue
JreChr02G10388	26.5856	0.385981	0.647383	0.484621	1.14825	1.03616	4.23317	3.01692	0.090656	1.19617	11.6424	0.78081	0.723921	0.745923	0.894609	2.38603	9.62261	0.723993	0.877073	0.551846	0.801845	0.81779	8.79667	11.1706	9.20632	0.889677	2.44692	4.53979	0.788151	4.24421	0.743588	6.92834	0.647307	22.5218	0.822757	1.29526	15.3269	7.60411	6.61952	5.13383	5.07993	11.0229	7.76526	10.7321	0.774788	9.85853	1.12469	9.08495	turquoise
JreChr02G10402	0.019491	0.03462	0	0.012212	0.121248	0.001159	0.016719	0.020915	0.566503	0.083535	0.005281	0.01134	0.211283	0.035989	0.077718	0.717996	0.897624	0.968657	2.47413	1.67429	2.18764	6.20362	3.17383	9.17062	0.018037	0.044873	0.201379	0.0333853	0.10833	0.861426	2.11202	6.18269	6.27359	4.72101	0.296787	0.326752	4.36431	9.89836	7.97658	17.5845	45.0963	1.14615	2.59315	10.0686	4.57805	5.16372	0.230801	0.343803	blue
JreChr02G10407	9.85587	9.61709	12.3353	2.81203	3.72886	2.74542	1.74424	0.960139	0.543025	1.46771	2.06975	1.95956	1.48465	0.922668	1.1684	0.118051	0.118148	0.502438	0.192526	0.562288	0.881978	0.274853	0.399033	0.229472	10.6028	3.09543	1.08247	1.83234	1.19191	0.246212	0.545597	0.301119	2.78058	0.962249	0.63604	0.918473	30.7695	29.2505	36.0694	29.8463	20.6179	40.3801	15.7407	10.7584	9.7767	9.16379	9.5852	0.262171	turquoise
JreChr02G10416	7.77852	5.50166	4.91586	1.94908	0.595463	1.19833	2.81846	2.51257	2.87123	1.25672	1.97731	1.68615	1.61966	0.776682	1.27011	0.509581	1.12637	0.745574	1.09621	0.386401	0.648976	1.03532	1.07102	1.62865	6.06535	1.24763	2.73409	1.64006	1.22215	0.79384	0.710528	1.245	0.003463	1.20327	1.89439	2.62584	5.36067	1.71893	1.93272	1.63055	2.57124	2.77958	3.47873	5.26195	3.95847	2.39601	6.82623	2.47817	turquoise
JreChr02G10418	9.10912	7.99789	7.31633	5.23907	7.41115	5.30746	8.755	8.11517	10.7738	1.5295	2.17476	1.57827	3.68365	4.14602	3.76074	7.68236	6.60511	8.20754	11.6951	8.44823	14.7179	13.36	13.9633	14.0715	8.14111	5.98589	9.21465	1.76085	3.86347	7.49834	11.6204	13.7983	0.230742	7.66942	2.3447	7.23229	23.8919	28.4121	10.6981	18.8588	15.2001	28.0058	38.2168	33.8969	25.8237	18.3312	6.34949	3.09029	blue
JreChr02G10420	3.18642	3.07587	2.63521	0.895618	1.29323	0.429381	0.38488	0.185337	0.023796	0.039578	0.671835	0.251308	0.242406	0	0.165886	0	0.129595	0.32578	0.077645	0.074436	0.07973	0	0.174481	0.05442	2.96583	0.872742	0.198004	0.320907	0.136097	0.151792	0.0772703	0.0763003	0.815216	0.178218	0.147125	0.370392	0.556401	0.511288	0.224972	0.303131	0.0187183	0.0590323	0	0.0144163	0.0158807	0.014951	1.84537	0.289612	turquoise
JreChr02G10424	134.858	110.976	67.288	16.9336	15.1647	24.4998	18.3288	14.0357	19.5812	9.33269	8.84882	7.10171	6.22948	6.27408	7.80187	9.4785	6.90797	11.7503	15.1434	9.31456	19.2347	29.879	19.4592	29.3659	104.374	18.866	17.3152	8.42774	6.76848	9.37892	14.5642	26.2347	21.4751	31.0251	9.02984	16.2487	67.8339	68.6801	120.16	102.386	84.9771	160.806	126.978	130.51	92.0656	118.183	118.127	13.262	turquoise
JreChr02G10433	9.74199	9.74417	8.86093	5.23637	5.46958	4.82786	5.49727	4.34366	6.12385	6.0326	5.80571	4.85366	1.10321	6.98761	6.21056	6.31796	5.79141	4.97532	4.0898	2.91845	4.16054	4.11797	1.01425	3.30871	9.44903	5.17794	5.3216	5.56399	4.76713	5.6949	3.72293	2.81364	5.14148	4.25531	6.5987	7.08441	10.594	11.5506	9.6974	7.55689	4.41091	8.2185	6.11808	3.71122	3.94387	7.02226	6.33491	5.29169	turquoise
JreChr02G10434	28.3967	19.2861	21.8256	11.0385	14.8691	18.5592	12.8195	10.4389	9.51523	12.6304	13.9554	14.448	10.4256	9.55237	14.0484	36.2829	21.9886	28.7776	30.6484	25.8242	33.1471	52.0951	30.3263	63.4906	23.1694	14.8223	10.9246	13.678	11.3421	29.0164	29.8732	48.6373	35.1806	18.3853	22.2755	11.8715	29.4875	42.4816	44.8481	53.8665	66.6314	54.9527	49.9536	71.5338	53.8537	58.3081	26.6734	16.2498	blue
JreChr02G10441	15.4551	11.3058	13.3394	11.371	11.4122	12.5502	12.2295	3.04894	9.71547	5.38454	2.46346	5.09119	6.06842	4.4733	5.17411	9.68571	8.97135	10.0551	10.6801	7.25138	11.1081	10.4729	11.3794	16.4777	13.3668	11.7778	8.33129	4.31306	5.23861	9.57073	9.67985	12.7767	7.29509	11.533	6.07879	10.9704	21.1476	14.3448	7.61588	13.4367	10.6402	20.7816	16.7893	21.8907	16.6079	11.0626	12.8405	5.61604	brown
JreChr02G10443	23.3331	16.835	26.5337	27.1759	20.5848	21.7783	37.496	34.749	32.6433	10.3775	5.92882	8.07958	16.7146	15.9006	14.47	17.75	18.8888	0.786124	13.6822	12.0102	1.56179	20.3034	22.7877	14.5474	22.2339	23.1797	34.9628	8.12864	15.6951	12.475	9.08473	19.2128	32.0489	31.7407	15.9736	9.08065	22.8986	28.7532	16.9937	26.9346	25.4144	23.5007	33.208	40.2087	44.3639	35.5066	12.8393	11.8251
JreChr02G10449	44.4552	42.7248	38.1276	13.5619	18.634	35.8906	22.4265	13.4528	15.1931	10.0239	16.2672	10.4689	20.4181	14.0842	12.8899	12.7253	14.5652	28.1297	14.5348	11.3791	21.2304	22.3092	18.6974	26.0167	41.7692	22.6955	17.0241	12.2533	15.7974	18.4734	15.7148	22.3411	14.7929	14.5853	13.8274	20.0326	29.2832	22.5433	20.4584	29.6008	24.0765	43.9526	41.565	53.399	57.8363	38.1876	37.9548	9.45234	turquoise
JreChr02G10463	39.8968	7.79931	27.9767	16.0174	20.9573	23.914	30.4891	24.8748	30.9923	15.8573	25.6094	25.036	23.1347	33.3288	16.4959	18.8859	21.1956	18.4706	51.9629	35.5664	44.9321	49.7397	49.9707	69.9366	25.2243	20.2962	28.7854	22.1676	24.3198	19.5173	44.1538	56.549	23.8718	22.1725	26.7824	31.2264	6.89421	6.23795	9.48659	5.91124	10.9973	11.3766	15.2191	12.6932	11.5479	10.3969	22.8206	11.64	blue
JreChr02G10469	25.1715	19.6586	21.3696	7.10204	5.95742	6.05955	4.46072	5.16199	4.02015	3.8645	3.36831	4.6575	3.91043	5.20689	4.21973	6.29795	5.80256	7.10154	10.527	8.31942	9.18511	12.5802	14.1361	13.3936	22.0666	6.373	4.54762	3.96344	4.44568	6.40068	9.34384	13.37	14.7096	8.47717	41.4496	4.01305	14.6602	9.35514	9.10391	9.60732	10.7814	5.55358	5.04729	5.94127	4.4418	4.97248	13.4328	6.53625	turquoise
JreChr02G10470	31.4863	34.3484	38.4533	11.8766	17.2221	37.4778	11.2332	18.4788	16.3789	23.8206	13.0558	13.7647	12.3859	16.2075	17.1834	32.0151	12.3642	23.1732	15.8868	11.4082	17.1526	10.1895	15.4097	0.223663	34.7626	22.1922	15.3636	16.8804	15.2589	22.5175	14.8159	8.60762	17.7281	15.4718	31.2662	12.1494	98.3645	15.033	6.02075	9.93832	3.77809	69.595	52.2758	19.4764	18.2073	12.4168	39.4983	11.0585	turquoise
JreChr02G10472	4.92298	4.93936	3.66488	0.039769	0.218435	1.04138	0.040175	0.017131	0.097648	0	0	0	0	0	0	0.013869	0	0	0	0	0	0.018448	0	0	4.50907	0.433193	0.0516513	0	0	0.004623	0	0.00614933	0	0.033212	0.033495	0.019749	6.48629	0.593794	0.0882783	0.0524273	0	0.576022	0.144101	0.0915677	0.086311	0.0106287	3.61805	0.00424133	turquoise
JreChr02G10494	21.6745	17.5521	17.052	5.91454	6.93477	6.91132	6.7297	5.45309	7.32045	9.72651	12.3703	13.442	8.30008	9.17237	10.2053	9.46916	7.93445	10.1842	17.3953	10.2512	18.7607	22.1031	24.5238	28.5347	18.7595	6.58688	6.50108	11.8463	9.22591	9.19595	15.4691	25.0539	13.9736	13.2672	8.95143	9.82834	19.9332	15.811	15.822	12.148	16.8882	15.1294	16.5534	18.0436	16.3492	15.0752	16.2736	9.91053	blue
JreChr02G10497	30.7313	37.5732	26.6868	15.747	11.2678	8.8396	9.30885	7.04878	13.0726	9.32513	9.16993	9.66843	8.77454	9.83117	14.4134	19.6849	17.6784	21.7859	20.7388	15.4927	20.1245	20.588	21.4437	38.7204	31.6638	11.9515	9.81007	9.38783	11.0064	19.7164	18.7854	26.9174	13.1435	4.70996	15.7824	11.2641	60.9225	48.5334	59.8913	49.7804	28.2855	33.1447	31.414	41.9573	36.9898	40.651	29.6248	7.59131	brown
JreChr02G10502	3.50088	2.89835	2.70696	0.007924	0.083953	0.684349	0.00392	0.001998	0.004551	0	0	0.00204	0.005392	0.005883	0	0.013358	0	0.006196	0.003978	0	0.006497	0.006173	0.014352	0.006947	3.03539	0.258742	0.00348967	0.00068	0.00375833	0.006518	0.00349167	0.00915733	0.005402	0.001763	0	0.001882	2.12272	0.0120333	0.00130967	0.0119627	0.00729933	0.19868	0.0151643	0.444386	0.0105053	0.00672867	4.53676	0.000853	turquoise
JreChr02G10523	25.8227	25.1406	24.3409	27.8272	35.7686	29.4025	25.215	28.6116	17.728	9.76703	10.2803	11.053	11.2337	8.3993	10.6515	13.0426	13.0628	11.5812	5.73347	6.96169	2.80887	1.81926	3.4648	3.8717	25.1014	30.9994	23.8516	10.3668	10.0948	12.5622	5.16801	3.05192	6.0093	7.01616	12.5554	28.9321	6.75162	7.04342	4.9152	5.96447	2.6809	3.45401	1.90809	3.17728	2.1199	2.43111	28.6899	15.9418	yellow
JreChr02G10527	20.5499	22.0618	17.8521	5.46302	6.9331	6.13013	7.75454	8.84789	12.0594	4.55932	4.74609	4.76776	4.71927	5.61674	4.34822	8.12129	6.6425	11.5775	7.16492	6.32292	5.65006	6.65398	5.46025	5.97824	20.1546	6.17542	9.55395	4.69106	4.89475	8.78044	6.3793	6.03082	9.17561	8.90717	6.93642	5.57943	16.0551	8.7784	7.69727	7.94144	10.2909	12.9606	12.5188	16.957	12.5601	13.6164	18.5587	4.49933	turquoise
JreChr02G10531	11.8701	13.6375	5.78091	10.7812	9.56592	8.29351	0.083582	7.38813	9.84103	9.25846	0.120649	9.82046	10.4644	8.25461	8.12364	23.2497	20.7688	21.7736	1.24272	13.7034	7.89344	6.0322	4.99767	3.91203	10.4295	9.54689	5.77091	6.39986	8.94755	21.9307	7.61317	4.98063	0.058569	8.93311	8.16144	10.4797	46.889	44.9223	15.6846	9.20343	2.17343	15.1637	10.4093	3.13231	4.5192	3.13929	9.63005	10.6454
JreChr02G10539	75.614	61.3848	49.0956	0.664016	1.48927	19.1571	0.449881	1.20471	0	0	0	0	0	0	0	0.0188	0	0.003179	0	0	0	0	0	0	62.0315	7.10346	0.55153	0	0	0.00732633	0	0	0	0	0	0.004349	26.5614	2.25726	0.0311303	0.191189	0	2.61215	1.13383	2.29148	0.831733	0.112436	64.1818	0	turquoise
JreChr02G10540	19.8135	17.8927	18.0963	7.76656	8.08141	9.42119	5.63733	6.77779	5.09912	2.19567	1.92478	2.34442	3.19042	2.25499	1.65553	4.39919	3.14897	3.69559	3.91528	3.3811	3.27179	4.72681	3.43187	5.52969	18.6008	8.42305	5.83808	2.15496	2.36698	3.74792	3.52272	4.56279	5.84854	4.36863	4.38137	7.16613	15.119	6.71246	5.09343	7.99971	6.14829	7.26001	9.50151	9.60333	7.38873	6.45188	21.6689	3.96458	turquoise
JreChr02G10543	12.7191	0.590625	0.606421	0.536924	0.483228	0.60532	0.557604	5.47021	0.580467	1.26456	0.850066	7.16356	9.60568	1.08442	1.5954	8.67374	1.48706	8.15703	3.15481	0.951219	2.21774	7.79039	8.44697	1.53463	4.63872	0.541824	2.20276	3.09273	4.09516	6.10594	2.10792	5.924	0.518586	1.08715	1.76621	4.65946	7.25544	3.82234	1.53025	2.44848	2.29652	5.11326	4.80512	4.67714	3.43056	2.01402	10.16	4.35582
JreChr02G10552	46.8422	50.6196	39.5115	15.4502	13.8382	16.9874	15.9301	12.2344	15.9178	17.9421	22.0214	14.2315	18.8835	21.3142	20.9337	23.6607	17.6123	25.9318	34.3969	27.0943	38.5547	40.5582	45.0436	71.44	45.6577	15.4253	14.6941	18.065	20.3771	22.4016	33.3486	52.3473	61.3643	53.8127	27.6361	18.7807	42.6172	61.6773	67.8868	45.9001	46.5648	54.7935	49.1113	42.7685	55.8243	68.4254	38.9539	19.3326	brown
JreChr02G10556	4.209	4.18967	3.6527	1.56373	3.12867	1.69069	1.95405	3.31857	2.07282	0.733535	1.82989	1.6454	0.97756	1.55196	0.395431	5.33105	2.04108	4.3411	8.12697	5.45345	8.7605	14.2518	11.2594	16.5569	4.01712	2.1277	2.44848	1.40294	0.974982	3.90441	7.44697	14.0227	4.38	5.92767	2.17839	2.86742	2.0256	1.16366	0.861807	1.76136	5.36578	0.832192	0.935114	1.60318	0.882909	0.83742	3.12162	1.55408	blue
JreChr02G10557	7.84132	5.44689	9.51407	5.71854	5.45683	4.15365	3.5194	5.81126	3.27271	3.81013	4.78377	2.13169	3.30283	4.45876	3.67572	4.12746	5.04207	5.36069	7.29666	6.06548	7.1909	9.97138	10.8486	11.6129	7.60076	5.10967	4.20112	3.57519	3.81244	4.84341	6.85102	10.811	13.6152	7.251	6.08452	3.39028	4.63499	6.83511	7.51968	6.30204	7.01987	4.07471	4.76508	4.05048	3.40806	3.61356	7.68413	5.8079	blue
JreChr02G10564	8.51138	8.19243	7.58912	4.43545	3.89096	3.85653	5.13691	4.00126	3.13079	1.6583	2.74669	2.5211	2.40917	2.02771	1.70428	2.65978	2.89836	2.96971	4.29191	4.16259	4.32113	6.09448	4.05708	4.92047	8.09764	4.06098	4.08965	2.3087	2.04705	2.84262	4.25854	5.02401	0.067918	3.68185	2.64174	5.01812	7.09997	7.37479	10.2392	7.34506	8.29447	9.39694	8.62454	7.90297	7.33861	8.55392	7.17044	2.90081	turquoise
JreChr02G10571	12.4047	12.8031	14.1278	5.14369	4.58421	2.96643	7.223	5.70787	7.24402	4.60686	3.55872	4.32921	3.96098	5.84657	4.61641	8.30637	7.70505	9.04811	6.71556	6.04435	6.05339	4.77131	3.02035	6.07972	13.1119	4.23145	6.72496	4.16493	4.80799	8.35318	6.2711	4.62379	4.83556	5.93335	2.85088	5.30841	20.3565	16.9911	12.3423	12.7448	7.09417	16.1647	13.9952	13.5059	14.2812	11.7114	11.2179	3.69539	turquoise
JreChr02G10572	11.9108	11.4351	11.6552	12.7726	13.0061	10.1324	11.6968	13.3683	11.6935	3.20403	3.28618	2.36215	4.56897	3.51101	4.37715	6.74268	6.06042	5.93171	4.41506	5.47931	4.72829	5.36329	4.844	5.5239	11.667	11.9704	12.2529	2.95079	4.15238	6.24494	4.87422	5.24373	4.59979	10.0293	4.14115	10.7471	4.76327	5.62703	6.59881	6.88022	8.34003	5.74449	7.76829	8.05589	8.64805	7.50346	10.0842	4.09946	turquoise
JreChr02G10579	4.20178	5.72595	4.37391	6.18112	10.9826	6.33457	10.3845	5.61514	7.93067	4.38631	4.93977	3.71482	2.09686	1.70351	2.12142	2.40298	3.45898	1.91321	9.56838	7.0919	6.76728	15.9338	9.3436	4.53712	4.76721	7.83278	7.97676	4.34697	1.97393	2.59172	7.80919	9.93817	10.0093	9.45074	5.29918	18.0044	11.1736	9.00985	6.48094	8.6103	7.93672	11.2329	19.2045	15.2028	18.7144	22.4355	3.71037	9.42161	blue
JreChr02G10582	16.8728	4.55398	10.5731	5.72385	6.88195	4.9445	1.19537	0.969006	0.795028	1.03307	1.31911	0.521827	0.840618	0.001202	0.322909	0.071214	0.000392	0.001802	1.98574	0.996157	1.28956	4.79644	3.45146	1.70606	10.6666	5.8501	0.986467	0.958004	0.388243	0.0244693	1.42382	3.31799	4.58088	4.47805	2.28309	3.83815	12.3518	9.7668	13.477	15.5225	45.5532	22.8635	27.8247	23.7134	18.7351	22.3001	11.1338	0.594783	turquoise
JreChr02G10583	11.6782	19.5952	14.8235	5.54768	5.14736	5.64737	4.66694	1.87553	5.20246	1.81218	1.27826	2.18764	1.96759	2.0576	2.76916	1.74961	1.82277	2.80732	1.50647	4.7539	2.53851	2.32469	3.03425	1.86335	15.3656	5.44747	3.91498	1.75936	2.26478	2.12657	2.93296	2.40743	2.40789	4.90922	3.16135	3.6504	8.22491	6.45367	5.51062	5.39925	8.49377	9.19126	5.38722	5.68885	5.51738	4.80523	13.0146	2.70015	turquoise
JreChr02G10586	0.85682	0.03228	0.042312	0	0.000947	0.111811	5.29352	0.005895	0	0.772163	2.35627	0.312732	0.149396	4.05129	1.41706	3.52015	0.5086	2.84464	59.4415	50.7704	62.1586	95.2715	65.6767	81.9776	0.310471	0.037586	1.76647	1.14705	1.87258	2.29113	57.4568	80.9753	197.925	109.103	31.6116	0.465504	4.16437	13.9877	14.3752	64.0004	596.683	107.068	359.777	489.221	536.671	733.353	2.84639	0.0930333	blue
JreChr02G10595	796.818	759.299	795.203	873.5	717.974	1049.46	856.749	816.901	1142.76	581.825	588.976	571.397	724.082	739.776	818.223	654.465	709.79	613.068	160.482	437.999	204.151	19.6528	66.5863	95.2886	783.773	880.31	938.802	580.732	760.694	659.107	267.544	60.5092	128.129	336.254	729.019	820.569	211.791	239.141	128.684	162.07	45.477	83.3207	69.6372	97.6704	84.9912	74.736	816.897	563.25	yellow
JreChr02G10603	19.7515	15.8414	19.1997	23.2746	17.6385	16.1094	10.3789	13.1385	10.2838	9.74652	10.7815	8.72964	6.61492	4.53754	6.85058	11.3675	8.6907	9.57669	17.6645	16.989	18.1102	18.0176	14.4902	22.0428	18.2642	19.0075	11.2671	9.75254	6.00101	9.87828	17.5879	18.1835	14.3716	16.3835	11.1788	14.9985	11.5027	9.41645	11.2236	11.4262	11.827	8.81131	9.75309	13.3284	12.1627	9.34513	20.0765	6.92389	brown
JreChr02G10604	5.22351	4.5345	4.57472	3.74022	3.82447	5.53227	2.36434	3.59004	1.57955	0.983491	1.78164	2.46303	1.21765	2.39274	1.43711	2.62823	1.1482	2.04324	0.643368	0.889547	1.50774	0.014791	0.003337	0.183005	4.77758	4.36565	2.51131	1.74272	1.6825	1.93989	1.01355	0.0670443	0.028826	2.66803	2.29204	4.1844	3.14674	2.87006	1.72493	2.08365	0.574711	2.17329	3.18801	2.25096	2.86544	2.29573	5.15376	0.972765	turquoise
JreChr02G10605	60.1694	62.2206	73.3886	38.5786	31.7466	38.4066	38.2244	41.769	27.9004	19.3416	17.7538	15.986	26.6036	22.682	25.8292	32.627	31.9631	26.7125	24.6579	30.7862	26.9962	29.2252	23.1218	32.5416	65.2595	36.2439	35.9646	17.6938	25.0383	30.4342	27.4801	28.2962	34.3146	49.9905	26.005	26.7281	35.9707	38.1167	44.491	40.7675	28.2062	40.1336	59.765	40.3225	29.5336	35.9827	61.7986	44.8532	turquoise
JreChr02G10608	4.82459	2.23899	3.1548	1.4868	2.63254	1.96674	0.76651	1.28979	1.81818	2.62224	1.9397	2.72887	3.31094	3.53044	2.51028	5.54261	4.73549	6.63886	8.23113	5.82721	8.8305	8.60902	9.79138	10.6867	3.40613	2.02869	1.29149	2.43027	3.11722	5.63899	7.62961	9.69569	4.11212	4.28776	2.18537	2.70317	6.72998	10.8058	15.4871	14.3461	11.0002	10.0315	14.2625	15.3662	16.5431	12.6457	3.67228	1.89447	blue
JreChr02G10615	47.9512	81.5253	61.116	58.443	87.2085	90.9352	39.1814	39.1465	46.8063	23.4083	19.5982	31.3908	23.9858	31.985	26.6538	18.8831	25.1878	29.1959	17.4629	22.8372	21.0581	15.4055	18.4136	19.7508	63.5308	78.8622	41.7114	24.7991	27.5415	24.4223	20.4527	17.8567	23.3363	31.4258	36.0944	47.891	36.7579	24.2927	16.5319	20.3921	21.785	63.1931	43.0281	38.3864	34.2264	43.7534	78.8332	32.8988	turquoise
JreChr02G10621	15.9712	12.3384	21.5653	20.4845	20.8774	22.6882	22.9763	20.7706	12.9069	14.9904	11.9064	13.5002	11.34	11.5303	12.4826	10.2099	8.66797	9.63509	4.87923	5.2369	5.44599	4.16863	5.91751	2.41515	16.625	21.35	18.8846	13.4657	11.7843	9.50434	5.18738	4.1671	7.03171	11.046	12.3149	18.203	17.3128	14.2849	11.0406	9.2163	7.8697	16.6652	16.3725	13.6067	13.0965	15.207	15.7164	8.26197	yellow
JreChr02G10642	2.15911	6.78482	6.61233	3.93065	5.42117	5.01041	0.509588	1.16206	1.15898	0.370153	1.25907	1.57308	0.222484	0.22446	0.299864	0.437895	0.607542	0.17438	0.040197	0.703701	0.080649	0.38459	0.494517	0.189828	5.18542	4.78741	0.943544	1.06743	0.248936	0.406606	0.274849	0.356312	0.018297	0.603984	0.807388	0.440796	0.178641	0.0459113	0.0294213	0.2701	0.332359	0.0527777	0.0372637	0.0287107	0.070029	0.0191897	0.725878	1.10359	turquoise
JreChr02G10643	2.59515	1.96158	1.96436	0.071057	7.18241	4.70758	4.86532	0.103176	8.42792	6.00489	9.77443	8.0007	2.5305	2.49837	2.91898	1.91336	2.37238	3.39089	1.83154	2.36148	2.86364	1.70128	0.03984	0.925618	2.1737	3.98701	4.46547	7.92668	2.64928	2.55888	2.35222	0.888912	0.081819	4.65994	8.4387	9.27331	0.0193493	0.057291	0.475634	0.206322	2.43256	0.0321787	0.126709	0.118654	0.379401	0.495615	0.750106	4.51818	red
JreChr02G10646	10.1416	8.73412	12.361	3.65762	4.53548	4.30194	3.00219	4.4438	2.9	3.48889	2.54446	2.10461	1.72233	1.33962	1.44333	3.88119	3.72879	4.85117	5.26913	3.78223	5.48602	9.64732	7.01985	14.9021	10.4122	4.16501	3.44866	2.71265	1.50176	4.15372	4.84579	10.5231	7.63564	5.93037	3.75603	4.79157	6.94317	7.14884	5.57933	6.44578	6.02506	12.4296	8.65497	8.54259	6.16358	5.31204	11.9764	4.62972	brown
JreChr02G10658	10.9301	6.36731	6.2734	2.52354	4.60063	3.77084	4.41179	3.69363	3.09765	1.5176	1.55207	2.72286	2.30028	2.84913	2.19439	3.63061	2.43913	3.4535	7.13085	3.29042	6.26065	9.37959	7.38624	10.9922	7.85694	3.63167	3.73436	1.93085	2.44793	3.17441	5.56064	9.25266	6.22458	5.54427	2.13351	4.54287	6.90801	5.35844	4.29807	6.0349	9.19175	7.40402	6.37477	9.73526	7.98836	5.3835	7.66244	2.5844	brown
JreChr02G10667	54.7291	107.905	55.5634	23.7249	30.1247	63.4644	21.9907	17.4045	11.7782	7.6808	6.68505	5.84893	5.66146	4.67976	7.19261	21.8256	6.71586	1.0894	13.0624	7.46647	11.8242	7.11958	9.77443	4.75324	72.7327	39.1047	17.0578	6.73826	5.84461	9.87697	10.7843	7.21575	7.26056	13.0025	6.10323	30.5591	124.456	16.4496	10.6876	15.238	3.05859	34.536	43.2413	20.6751	43.7533	22.4957	95.8617	3.97174	turquoise
JreChr02G10671	51.063	35.2558	45.2006	105.516	139.864	76.8018	9.20724	67.0551	93.8512	139.759	115.841	126.172	136.954	148.26	3.87066	113.333	116.75	91.6966	2.74608	89.234	135.287	98.2895	121.646	135.634	43.8398	107.394	56.7045	127.257	96.3618	107.26	75.7558	118.523	95.625	167.654	107.376	157.832	298.955	183.509	123.403	236.211	160.551	69.3162	46.1607	48.0894	122.846	99.473	53.6737	106.265	green
JreChr02G10681	13.8212	12.1462	13.6547	7.14094	6.6474	8.10504	11.4096	8.71833	7.53919	2.61144	3.82068	2.49994	2.60121	2.01687	3.00664	5.55899	4.25092	3.68453	5.1225	5.00446	6.69926	5.20941	7.49397	7.85074	13.2074	7.29779	9.22239	2.97736	2.54157	4.49815	5.60874	6.85137	4.8351	11.0263	4.73447	5.31829	7.94362	6.6819	5.22539	8.48539	8.64074	12.4786	7.8848	7.23468	4.95124	4.82226	15.6768	7.34532	turquoise
JreChr02G10683	5.5704	4.63451	4.31321	0.167329	0.581671	0.903474	0.124144	0.286066	0.205151	0.255901	0.381571	0.183178	0.373796	0.278201	0.600485	0.747732	0.454479	0.172769	0	0	0.100038	0	0	0.038511	4.83937	0.550825	0.20512	0.27355	0.417494	0.458327	0.033346	0.012837	0.038475	0.055598	0.060194	0.300533	8.07871	1.59012	0.204248	0.693521	0.174604	3.23714	2.68444	13.516	37.1002	52.7167	4.06396	0.0246247	turquoise
JreChr02G10686	4.7148	7.36118	7.37173	0.335067	0.458919	0.793961	0	0.009996	0	0	0	0	0	0	0	0.424817	0.782348	0.268543	0	0.011989	0	0.012632	0	0	6.48257	0.529316	0.003332	0	0	0.491903	0.00399633	0.00421067	0	0.024673	0.01232	0.130879	1.95136	1.97652	0	0.00809167	0	0.0387303	0.087068	1.879	0.435577	0.0184447	8.72486	0.000951667	turquoise
JreChr02G10688	3.88722	3.1344	4.15772	3.57558	4.5866	4.16025	5.05785	4.62865	4.999	0.216846	0.228201	0.327858	2.15424	1.55435	0.296019	2.12944	2.16237	1.26788	2.25352	0.297031	0.244294	3.69729	3.668	4.78213	3.72645	4.10748	4.89517	0.257635	1.33487	1.85323	0.931615	4.04914	2.84048	0.138588	2.56953	3.47121	4.01009	3.01285	0.189476	2.75733	2.60853	3.64871	4.18921	4.91839	4.11726	5.16848	2.80863	2.02235	turquoise
JreChr02G10694	0.370569	0.640068	0.824473	0.150619	2.88127	0.09227	0.110409	0.167922	0.134982	1.003	0.065754	0.372984	0.12765	0.127228	0.160341	0.257782	0.214598	0.320286	0.29793	2.87647	0.167486	5.18429	4.67027	0.544282	0.611703	1.04139	0.137771	0.48058	0.138406	0.264222	1.11396	3.46628	0.002013	0.148117	0.193225	1.95929	0.387936	0.151252	0.354754	0.253057	1.02643	0.506063	0.299417	1.96035	0.202569	1.35842	0.266439	0.377928	blue
JreChr02G10697	7.30408	2.78756	2.53457	0.706025	1.50249	0.642667	0.029605	0	0.082521	0.222645	0.50049	0.123206	0.127079	0.294452	0.19683	0.722535	0.583912	0.674552	5.90249	0.936202	5.97255	5.25488	4.47466	4.62206	4.20874	0.950396	0.0373753	0.282114	0.20612	0.660333	4.27041	4.78387	8.97631	8.68248	1.24382	0.586943	16.0745	6.43844	0.13354	0.181556	3.91043	3.32607	5.44525	5.23385	5.55239	8.38194	4.18387	0.133375	brown
JreChr02G10698	35.5803	38.9676	35.6017	35.8173	32.8097	35.2883	23.0339	17.9281	19.6407	17.9413	18.0352	21.6295	14.9346	13.5153	11.0835	24.5653	12.6896	17.6058	9.88609	13.8682	10.7602	7.15256	9.8061	10.6445	36.7166	34.6384	20.2009	19.202	13.1778	18.2869	11.5048	9.20106	12.9864	11.3163	13.3445	24.633	12.4474	9.72707	11.9432	12.7735	10.4411	11.5806	14.0064	16.5414	10.2203	13.5575	31.0898	19.4827	turquoise
JreChr02G10705	20.6876	28.5392	30.0513	22.8781	24.0892	22.3499	30.3209	24.672	24.5912	26.6249	36.9831	30.1965	26.2099	24.9736	21.1877	42.48	31.3848	39.6142	41.5153	47.0164	50.1953	62.9191	70.4024	46.0703	26.4261	23.1057	26.5281	31.2682	24.1237	37.8263	46.2424	59.7973	107.215	74.6643	14.5346	22.8801	29.5673	26.5209	54.0502	33.9736	31.3125	7.87161	12.8429	12.6452	13.0071	12.9424	26.0754	21.7198	blue
JreChr02G10707	0.023893	0.066911	0.102013	1.40456	0.594619	0.338883	1.09137	1.08736	1.36509	1.35658	2.08784	1.13357	2.15581	1.62669	1.16918	3.31441	3.50407	2.94384	3.97547	2.84087	4.57173	6.81173	3.28496	4.44984	0.0642723	0.779354	1.18127	1.526	1.65056	3.25411	3.79602	4.84884	0.105676	3.90929	1.5764	1.64634	5.16631	4.42258	7.5362	15.9568	8.20528	20.176	32.6893	19.8822	25.7055	16.2746	0.0259283	1.25013	blue
JreChr02G10722	19.095	19.9982	17.8129	9.5573	12.6465	9.61325	8.8842	6.65507	7.18841	5.49645	5.65658	5.48288	7.29744	6.7084	7.47833	8.63287	7.23436	8.29674	9.3416	6.45562	9.87139	12.8356	14.2695	12.1186	18.9687	10.6057	7.57589	5.5453	7.16139	8.05466	8.5562	13.0746	6.32282	8.01349	7.7569	9.32839	10.715	12.9389	12.9068	13.6429	13.9879	15.167	17.9695	19.611	16.7805	16.6993	16.7632	6.00896	turquoise
JreChr02G10723	10.5864	6.85293	5.72202	6.17753	4.80119	4.4364	3.28773	3.76031	4.54672	4.72755	5.39947	6.57496	5.91843	6.44858	4.27106	12.3796	8.4955	13.087	24.9495	11.7198	26.0274	62.4063	45.2792	36.5577	7.72044	5.13837	3.86492	5.56733	5.54603	11.3207	20.8989	48.0811	22.3249	17.8409	10.3322	7.91467	10.6317	10.6373	18.7995	14.4675	35.7431	12.6362	20.0059	18.6566	16.3412	8.91113	8.08463	4.41897	blue
JreChr02G10729	23.7209	9.01597	27.448	36.4069	40.6512	34.9952	30.2062	24.2702	19.6253	18.3181	14.6344	16.4368	15.5774	20.0412	18.4173	15.1851	17.6059	6.61503	1.48339	27.3259	20.8792	29.8002	32.1754	28.859	20.0616	37.3511	24.7005	16.4631	18.012	13.1353	16.5629	30.2782	67.0925	10.3395	23.399	8.29102	50.8806	65.6028	50.6209	36.8593	28.2327	86.2952	49.2025	91.9241	96.393	41.7598	22.4081	17.3674
JreChr02G10730	0.091661	0.087004	0.029983	0.832088	0.807473	0.252576	0.735491	1.39934	1.05123	1.93788	2.25603	2.06358	1.72605	7.0688	1.3739	6.9604	6.85416	10.4283	418.322	141.962	499.249	1132.72	1043.77	1178.03	0.0695493	0.630712	1.06202	2.08583	3.38958	8.08094	353.178	1118.17	79.8608	29.4768	14.0491	0.555842	0.0729037	0.561725	1.00807	2.51485	309.328	0.00303733	0	0	0	0	0.038733	1.93479	blue
JreChr02G10731	20.1626	19.9089	23.5415	18.1162	22.7457	17.7395	16.3629	16.2062	17.0689	12.1685	9.95304	10.3241	7.51207	8.20504	8.59167	12.2995	8.42122	9.95539	5.04759	6.13097	6.29843	8.27116	4.92814	4.59256	21.2043	19.5338	16.546	10.8152	8.10293	10.2254	5.82566	5.93062	3.75863	7.79947	13.2257	17.943	12.8419	18.8176	20.4263	18.1303	9.13483	9.90469	13.3093	13.0289	13.9132	13.3921	17.2706	11.6366	yellow
JreChr02G10732	1.78612	2.34195	1.77642	2.23773	3.044	1.79649	3.33387	3.04014	1.88924	0.580778	2.93829	3.12905	2.6973	3.29714	1.5582	2.1535	4.38703	4.06839	7.89837	2.34462	4.00888	9.44276	7.04281	7.4209	1.96817	2.3594	2.75442	2.21604	2.51755	3.53631	4.75062	7.96882	0.29584	0.92574	0.463532	2.61968	2.93304	3.01633	2.46483	3.08461	5.40935	1.53602	0.931881	0.324342	2.23378	1.40496	1.418	2.41658	blue
JreChr02G10733	32.2163	27.889	21.4585	0.320929	0.03956	7.18652	0.319569	0.702133	0.006888	0	0	0	0	0	0	0	0	0	0	0	0	0	0	0	27.1879	2.51567	0.342863	0	0	0	0	0	0	0	0	0.029078	10.8392	0.582561	0.010906	0.0559983	0	1.51194	0.612694	0.860495	0.623971	0.000520333	25.3547	0	turquoise
JreChr02G10737	33.4197	26.0183	27.3207	0.435512	1.46379	1.156	0.137415	0	0.559843	0.741086	0.180841	0.741696	0.562523	0.272952	1.04685	0.902126	0.469859	0.373024	0.593542	0.304557	0	0.253192	1.16259	0.216353	28.9195	1.01844	0.232419	0.554541	0.627441	0.58167	0.299366	0.544045	20.6158	13.8757	0.329379	0.387172	53.8968	21.1535	12.5119	6.82584	0.770457	5.85721	3.14745	3.0754	1.40104	2.61817	35.99	0.317645	turquoise
JreChr02G10738	7.5098	241.216	217.249	117.601	121.823	142.408	109.657	87.885	106.428	48.303	59.2349	52.1381	81.2923	94.1987	76.0863	55.5517	63.024	56.5303	46.3606	42.8115	44.2156	48.9906	6.22485	86.1856	155.325	127.277	101.323	53.2253	83.8591	58.3687	44.4626	47.1337	49.7515	64.8731	66.8997	104.067	102.294	36.0089	14.8625	17.6983	15.2829	110.16	72.2843	50.5732	33.3844	44.6569	94.6417	47.2698	turquoise
JreChr02G10739	84.1304	81.9828	74.2323	33.2702	34.5371	42.2574	34.4831	29.1391	15.2877	15.5116	17.1975	17.2787	14.7025	17.7263	16.3318	15.5627	16.4699	18.67	16.1912	13.3288	17.9785	22.7629	23.3382	27.9317	80.1151	36.6882	26.3033	16.6626	16.2535	16.9009	15.8328	24.6776	30.6029	26.5573	23.5149	31.6061	57.2192	45.9866	39.7004	32.8099	28.4437	62.5105	32.6021	57.2774	45.8437	42.8505	55.626	22.0475	turquoise
JreChr02G10743	4.63548	6.24364	11.816	8.20426	13.3625	6.29661	8.8592	4.11098	0.732885	10.0989	8.54814	11.0895	2.99028	0.918991	2.58488	7.61506	6.63544	9.44631	4.41288	8.59982	3.23128	8.52703	1.21758	4.60644	7.56505	9.2878	4.56769	9.91217	2.16472	7.89893	5.41466	4.78368	5.46288	7.34746	6.79405	0.962323	9.44881	9.58903	9.35676	2.5422	1.91687	3.78198	2.14527	3.51231	3.03719	3.02527	5.88013	12.973
JreChr02G10758	38.5116	38.2843	39.8953	32.4512	24.096	29.7886	30.0899	24.7849	23.4075	11.6179	9.12492	12.5196	10.8612	10.3258	11.2848	12.1179	11.3326	15.0737	22.0984	17.6321	11.3851	33.9457	34.0631	46.7724	38.8971	28.7786	26.0941	11.0875	10.824	12.8414	17.0385	38.2604	27.71	21.0083	16.9074	18.1839	25.4941	19.5045	26.293	23.7282	42.5635	66.8292	57.2114	51.7658	48.2907	44.2239	41.8066	31.0457	turquoise
JreChr02G10761	16.9918	13.2798	8.88417	8.0667	6.87082	10.6378	8.0735	5.93627	7.30649	2.34034	2.52464	2.17151	2.8069	1.8578	2.46114	3.38137	3.85534	2.74496	4.84942	3.24414	6.06073	3.49329	5.34267	3.91548	13.0519	8.52511	7.10542	2.3455	2.37528	3.32722	4.7181	4.25048	1.91316	4.10591	4.30981	5.75207	8.54819	11.5338	6.69466	8.42899	4.13871	9.8554	8.6876	10.3141	6.90524	6.48027	14.2277	4.01595	turquoise
JreChr02G10782	20.6642	20.0119	22.0823	33.4287	41.0392	29.6701	22.399	3.14982	19.3992	14.069	1.65574	15.2281	2.11906	13.2491	12.2525	22.0048	16.6208	20.6498	18.4675	18.8914	18.6955	36.2739	29.698	32.8859	20.9195	34.7127	14.9827	10.3176	9.20689	19.7585	18.6848	32.9526	30.3815	33.0748	1.18704	3.12796	14.1064	21.5978	18.7785	20.7704	14.9373	15.6914	7.8424	20.0098	9.85432	23.6749	18.9904	7.26474	brown
JreChr02G10785	38.5353	40.0335	23.6946	1.75172	1.95782	5.18675	0.209751	0.592387	0.387483	0.165476	0.033523	0	0.093698	0.045371	0.056622	0.051497	0.069788	0	0.105468	0.031083	0	0	0	0	34.0878	2.96543	0.39654	0.066333	0.0652303	0.0404283	0.045517	0	0.281935	0.120996	0.232292	0.474354	30.1528	0.231144	0.174434	0.361266	0.0324453	18.2221	4.54052	4.03537	0.780433	0.31046	27.2575	0.0369763	turquoise
JreChr02G10789	10.6181	12.4857	13.9025	6.5689	6.47539	6.49456	8.24627	4.72894	3.74761	3.54245	1.15345	2.01732	3.56091	2.33462	0.242075	3.2982	3.56398	1.7602	2.65454	3.22216	3.17606	3.88437	4.97565	4.01119	12.3354	6.51295	5.57427	2.23774	2.04587	2.87412	3.01759	4.2904	2.98662	4.00781	2.82788	6.92527	10.2174	7.98494	6.59641	7.8378	2.55552	13.6755	9.40225	10.5738	10.9651	11.4586	11.5362	3.00505	turquoise
JreChr02G10806	0.030797	0	0.340876	15.0868	19.8141	9.36175	64.9717	67.3931	84.5751	18.5345	29.6451	25.1972	29.9992	26.5564	25.044	24.702	28.6277	29.1437	17.5588	23.1833	20.8125	18.4617	19.509	16.3453	0.123891	14.7542	72.3133	24.4589	27.1999	27.4911	20.5182	18.1053	36.7317	46.9263	38.9624	78.2048	0.0418383	0.274367	1.18654	1.79173	3.78292	0.0568083	0	0	0	0.00458033	0.018629	40.6206	red
JreChr02G10823	12.7792	8.85995	11.0353	0.70944	0.539813	1.51326	0.558936	0.102958	0.202619	0.605214	0.177828	0.1807	0.273855	0.183663	0.626367	0.266698	0.292038	0.55676	0.988401	0.34222	0.213499	0.109751	0.396594	0.113591	10.8915	0.920838	0.288171	0.321247	0.361295	0.371832	0.514707	0.206645	0.319021	0.148265	0.287876	0.487057	0.213798	0.217996	0.459772	0.279414	0.148729	0.183665	0.374622	0.812609	0.304679	0.48627	10.3544	0.171325	turquoise
JreChr02G10829	27.0219	20.8272	21.1148	10.2772	9.52234	12.2311	11.9972	10.1203	9.29826	4.89948	4.04909	5.13523	5.06445	4.60423	5.1055	7.75558	5.80348	11.1747	13.3072	8.63861	15.1951	17.5397	16.4904	26.1605	22.988	10.6769	10.4719	4.6946	4.92473	8.2446	12.3803	20.0635	9.42938	10.006	8.7879	8.57019	28.9026	21.7985	21.9068	23.8056	30.6837	53.1062	48.316	56.6477	49.804	43.1983	27.748	7.5046	brown
JreChr02G10839	5.2665	5.66001	7.34154	6.50581	5.8961	7.41012	10.1508	9.79138	9.80073	4.78132	6.66259	5.44517	5.2976	6.16357	5.26078	15.6449	11.2825	7.65265	22.4246	13.0726	23.0021	24.2087	16.6664	26.2396	6.08935	6.60401	9.91429	5.6297	5.57398	11.5267	19.4998	22.3716	20.3522	13.6042	3.24012	5.03389	3.88537	7.73289	4.26332	6.82191	7.07215	0.872837	1.28651	2.09264	1.3153	1.66969	4.72478	2.43798	blue
JreChr02G10848	8.17818	6.08043	4.447	0.005082	0.007039	2.87013	0.007253	0.008015	0.011901	0.008977	0.020033	0.010534	0.021431	0.015729	0.011129	0	0	0.002771	0.019285	0	0.003973	0.012761	0.005302	0	6.2352	0.96075	0.00905633	0.0131813	0.0160963	0.000923667	0.00775267	0.006021	0.048963	0.006131	0.004527	0.005406	4.18221	0.807975	0.00433	0.139511	0.00590833	1.79401	3.69784	3.27947	2.62804	1.98921	6.74166	0.002538	turquoise
JreChr02G10863	13.1262	0.07031	13.0786	0.055555	10.8485	0.083869	8.9318	7.93925	8.79603	0.123513	0.124041	0.087179	0.116242	3.25579	2.44737	8.10534	5.41459	0.111542	5.61707	0.118567	0.131994	0.152773	5.16616	0.172898	8.75837	3.66263	8.55569	0.111578	1.9398	4.54383	1.95588	1.83061	0.062783	5.01059	0.165977	10.1846	11.772	5.12304	2.3798	0.790521	9.75557	8.99165	5.6317	8.79471	0.543133	5.41454	8.93524	3.62168	turquoise
JreChr02G10864	38.1922	28.7916	27.032	6.49097	10.0482	10.109	6.64327	6.85173	7.19827	5.95025	5.84741	5.67845	3.81489	5.25268	5.61077	11.5525	8.42533	10.7112	5.44052	0.173056	8.21955	7.15681	0.256916	9.56813	31.3386	8.88274	6.89776	5.82537	4.89278	10.2297	4.61104	5.66062	10.7916	6.37858	3.26852	8.46319	71.9975	33.4627	21.9888	20.9348	18.5387	55.8267	33.3268	60.8716	15.9258	36.8631	34.6356	4.27626	turquoise
JreChr02G10871	82.6008	73.7068	67.6803	51.3452	48.4053	66.1936	65.7466	49.1149	69.2305	18.9025	10.7915	25.6733	19.6609	20.4094	33.3186	48.3559	47.2324	21.5398	27.8081	22.6838	19.2615	14.0042	9.70472	31.4328	74.6626	55.3147	61.364	18.4558	24.463	39.0427	23.2511	18.3806	19.5339	15.9905	27.8194	35.5651	70.0675	68.9168	37.4693	47.1668	28.9656	78.9673	45.9579	47.9509	45.2458	44.4142	90.5772	17.2464	turquoise
JreChr02G10875	12.5758	10.9403	9.12356	8.68863	7.90958	10.1448	18.3672	16.6869	12.966	4.45124	3.53198	3.30497	5.88401	5.381	4.10085	12.2413	10.6104	8.75777	12.4402	10.9702	13.7205	6.59997	6.61474	8.64077	10.8799	8.91432	16.0067	3.76273	5.12195	10.5365	12.377	7.28516	5.0908	7.02267	3.01172	15.1939	2.05686	3.61752	1.75215	3.24711	2.00968	2.66076	5.572	7.73225	9.69251	4.92466	13.3911	6.4065
JreChr02G10887	13.5392	13.4909	13.1576	6.19525	4.86222	6.93993	6.75048	5.02329	6.56274	0.940322	2.32341	1.49988	1.8483	1.84973	1.99566	3.68438	3.05178	2.21205	2.66478	3.10155	3.51312	3.91283	2.5203	4.49019	13.3959	5.99913	6.11217	1.58787	1.89789	2.98274	3.09315	3.64111	2.15777	3.1906	1.81774	5.47169	13.8871	13.0441	9.81507	12.5125	13.58	13.7597	18.6525	23.4882	18.4214	18.5342	11.6193	1.93565	turquoise
JreChr02G10889	2.06651	0.711598	0.770289	3.09933	3.12461	2.42319	1.4879	0.235906	3.97576	3.19259	0.322972	0.604471	7.73583	6.56127	4.94	5.78762	3.9975	1.24007	0.317683	3.57144	0.219118	0.327661	0.333148	0.359587	1.1828	2.88238	1.89986	1.37335	6.41237	3.67506	1.36941	0.340132	1.91379	4.39123	2.72287	3.73633	0.835559	0.885444	0.618339	2.00155	1.43323	1.57995	0.309053	1.17143	0.715778	0.695743	0.215147	0.542912	red
JreChr02G10892	0	0	0	1.3956	0.820784	0.308582	2.52938	1.20523	0.537481	1.14195	1.04245	1.79846	2.16616	0.873123	1.40282	10.5461	5.96803	9.73017	51.9267	19.0442	58.2292	147.154	110.003	240.626	0	0.841655	1.42403	1.32762	1.4807	8.74811	43.0667	165.928	64.6133	40.9491	24.7433	0.567617	2.26998	13.8219	44.5515	23.442	108.914	2.46856	4.50086	5.66814	3.70711	1.1935	0.111283	1.87795	blue
JreChr02G10903	22.6349	33.1071	28.2138	0.733831	18.8817	11.7307	2.06629	1.20696	12.5096	8.66737	19.388	9.67972	9.82444	13.3546	16.1175	12.8798	9.24548	13.457	30.3253	39.3824	28.9561	30.9968	1.44335	33.0286	27.9853	10.4488	5.26095	12.5784	13.0989	11.8608	32.888	21.8229	22.6714	43.8719	30.4082	15.3111	15.4863	34.745	24.7924	22.9784	28.6346	17.6305	19.4171	12.3884	13.9655	10.1949	24.6109	11.4513	brown
JreChr02G10906	0.137003	0.107046	0.106545	0.14202	0.054946	0.092347	0.158004	0.12479	0	0.117092	0.224436	0.215459	0	0.108773	0.173516	0.63615	0.202266	0.006482	8.31707	8.15371	6.69928	18.9407	15.0477	20.4774	0.116865	0.0964377	0.0942647	0.185662	0.0940963	0.281633	7.72336	18.1553	33.5405	19.4763	9.83827	0.110235	18.3247	1.17777	0.474215	5.30738	54.861	87.8867	61.427	32.235	20.4655	8.1929	0.129402	0.135413	blue
JreChr02G10909	0.154687	0.162645	0.198671	4.68029	5.28378	4.09916	5.75039	0.151661	0.13838	5.3572	6.71266	0.08939	4.30466	5.86792	4.9279	3.95473	0.201297	3.98106	0.223232	0.092841	5.42298	0.23193	7.87047	2.88141	0.172001	4.68774	2.01348	4.05308	5.03349	2.71236	1.91302	3.66127	10.9054	0.193209	5.23252	0.127827	18.056	61.5604	50.9401	23.0512	4.04739	4.41443	0.164591	5.06879	2.87402	19.807	3.24217	4.06678
JreChr02G10913	3.03676	3.37556	3.30474	0.30802	0.232757	1.05291	0.506627	0.371376	0.440509	0.037823	0.221232	0.335964	0.398096	0.213789	0.031935	0.337231	0.342045	0.297941	0.110633	0.02952	0.148901	0.188572	0.065122	0.208166	3.23902	0.53123	0.439504	0.19834	0.214607	0.325739	0.0963513	0.153953	0.221831	0.034338	0	0.387869	4.58564	2.78444	0.693475	0.65517	0.298825	2.95965	3.14514	2.86319	1.71469	1.27094	4.34655	0.116283	turquoise
JreChr02G10915	21.331	18.9378	19.427	35.6351	28.2138	19.3041	16.5975	16.5525	13.5516	40.0183	37.063	35.4107	38.5347	28.808	25.9002	31.468	31.3222	35.4547	72.1321	54.0958	0.184722	117.444	125.666	34.5502	19.8986	27.7176	15.5672	37.4974	31.081	32.7483	42.1376	92.5535	44.8022	66.7723	39.8357	39.6502	24.858	40.3883	27.2837	33.8438	56.6936	18.1692	36.2809	29.5975	25.3222	29.9257	16.8864	17.9906	blue
JreChr02G10919	9.27308	11.5035	12.036	6.99078	6.80362	7.13084	3.508	4.62733	3.26438	2.38844	3.2804	2.55414	3.19154	2.96816	2.50814	3.32686	2.78929	4.60799	6.19212	4.79834	5.45905	5.80915	5.55983	8.21076	10.9375	6.97508	3.7999	2.74099	2.88928	3.57471	5.48317	6.52658	7.68262	5.59011	2.63489	3.96524	13.4863	9.15965	9.72738	9.22334	20.238	17.6514	22.7787	25.2114	25.0745	21.3271	13.0156	3.01008	turquoise
JreChr02G10931	0.910137	0.347997	0.066906	0.006928	0.073066	0.119207	0.27238	0.004895	0.007133	0.001032	0	0.002955	0.00624	0.077232	0.002992	4.26537	1.57694	2.53116	16.4806	3.1665	23.1245	25.5098	11.2687	18.0178	0.44168	0.0664003	0.0948027	0.001329	0.0288213	2.79116	14.2572	18.2654	3.98431	1.81831	0	0.124975	2.35431	5.54527	4.78524	21.9542	25.9146	8.12911	5.16984	19.8477	18.0642	14.4853	1.72558	0.00471867	blue
JreChr02G10936	10.5357	7.87145	6.90936	0.375751	0.054028	0.027894	2.55388	0.278976	0.776659	2.28271	2.2532	1.48028	4.13272	0.63358	1.65927	1.0304	0.543342	0.662126	0.391822	0.157434	0.077401	0.173064	0.121367	0.123201	8.43883	0.152558	1.20317	2.0054	2.14185	0.745291	0.208886	0.139211	15.8259	8.89054	2.46715	3.35178	38.9683	307.361	565.972	310.88	60.7216	14.9973	46.4523	60.5945	113.062	152.418	4.4935	0.740729	turquoise
JreChr02G10938	9.32576	6.61723	16.5486	4.92712	5.57687	9.60342	5.50758	3.50231	4.1864	3.83429	2.99347	2.2445	1.66524	2.06189	3.84319	4.77236	3.37524	3.59708	4.63844	4.37439	2.97899	3.07959	4.50723	7.84389	10.8305	6.70247	4.39876	3.02409	2.52344	3.9149	3.99728	5.14357	4.23193	3.77399	3.9808	5.77412	7.91965	12.8431	13.5901	13.7097	9.60898	10.6202	14.7874	10.1151	12.7629	10.1808	10.5343	3.18966	turquoise
JreChr02G10940	7.6658	9.91526	4.43374	2.51048	2.30967	1.96768	0.532864	0.795285	1.38019	1.14343	0.340005	0.750304	1.05391	0.199068	0.363655	3.70816	4.34533	3.43609	1.58787	1.95255	1.76542	1.95075	1.71926	8.19247	7.33826	2.26261	0.90278	0.74458	0.538876	3.82986	1.76861	3.95416	1.24567	0.934006	0.045038	1.4604	25.027	3.92382	0.975184	39.3719	68.9865	0.686461	0.232422	0.282206	0.122669	0.121332	5.38559	0.506522	turquoise
JreChr02G10942	153.545	120.49	122.659	145.714	156.019	164.678	3.29835	121.233	69.4313	134.739	122.813	133.216	165.185	180.881	170.806	55.8185	178.527	180.085	90.9559	115.046	80.7437	47.5068	58.4272	63.776	132.231	155.47	64.6541	130.256	172.291	138.143	95.5817	56.57	46.4536	78.5241	141.667	139.75	64.4813	82.7841	59.5044	53.9054	42.1367	53.0361	45.2197	60.0652	52.8603	47.5341	142.307	89.9111	yellow
JreChr02G10946	11.282	17.0798	12.5231	14.7435	11.703	16.146	23.1087	23.0209	0.633103	0.293793	5.66761	8.06623	0.762272	7.71702	10.7914	1.72276	1.07756	0.500813	0.495146	14.7496	13.3114	12.0753	12.0121	13.0642	13.6283	14.1975	15.5876	4.67588	6.42358	1.10038	9.51873	12.3839	11.8179	11.8034	8.65735	11.0302	46.5159	48.3048	32.27	56.0051	20.1919	0.545413	5.88486	4.13995	4.43787	5.68282	12.006	10.1844	turquoise
JreChr02G10955	56.5439	32.2924	48.5271	12.4742	11.4852	11.333	8.70606	8.10404	10.6547	6.70797	7.39844	7.33661	7.67317	5.23029	8.61455	13.2331	7.78814	13.6839	3.09939	5.63309	2.55856	3.54755	5.76916	9.05451	45.7878	11.7642	9.15493	7.14767	7.17267	11.5684	3.76368	6.12374	13.6154	15.8233	8.69876	11.2343	159.397	195.966	242.541	185.885	128.516	146.327	73.4246	107.814	132.48	86.7268	56.1161	4.72119	turquoise
JreChr02G10956	42.0292	52.7179	53.7728	17.9162	22.4261	30.2008	20.8132	23.0829	21.945	11.8344	15.9021	13.3232	16.9145	18.3098	18.7797	11.239	13.8843	14.7045	13.8594	10.721	14.9232	9.03119	14.0371	16.9013	49.5066	23.5144	21.947	13.6866	18.0013	13.276	13.1679	13.3232	17.1453	14.3976	20.6909	24.3956	25.1479	21.2125	20.8852	18.5202	23.1465	21.6973	17.1854	21.419	19.5701	17.7006	46.5813	16.7674	turquoise
JreChr02G10966	10.2775	10.2942	8.15346	10.4975	7.78029	6.75389	6.89043	12.9855	6.9252	7.25509	5.96108	6.75922	6.23016	4.52015	5.79571	11.9947	8.08121	7.51155	8.25122	8.96851	14.4715	15.4365	16.5035	13.9762	9.57504	8.34389	8.93372	6.65846	5.51534	9.19582	10.5637	15.3054	4.73858	11.2186	7.25124	11.5527	18.0744	13.7047	11.2706	11.3138	14.9762	15.6539	12.2355	13.6192	10.7275	15.3535	7.16693	5.72852	blue
JreChr02G10968	2.19904	8.68771	7.90146	0	0.000854	0.000842	1.38464	0.651154	0.644645	1.53032	0.097104	0.710682	2.99878	1.32285	0.513908	0.002734	0.002634	0.002286	0.725794	1.25459	0.498796	0.611207	0.833923	1.08036	6.26274	0.000565333	0.893481	0.779367	1.61185	0.00255133	0.826393	0.841829	0.004068	1.13394	0.000526	0.013342	1.04027	8.00966	1.26429	1.74744	2.35534	1.86185	0.001919	0.00538633	0.275349	0.664072	12.5366	0.00154267	turquoise
JreChr02G10970	9.90652	7.43241	13.1836	4.4399	4.66243	3.48544	4.34312	4.4478	3.87593	1.90995	2.79668	2.84939	1.36393	2.64281	2.46448	2.25651	1.47093	2.80849	2.52203	3.06002	2.51485	2.6997	3.21585	3.23125	10.1742	4.19593	4.22228	2.51867	2.15707	2.17864	2.69896	3.04894	0.003118	1.88304	2.57127	3.95008	4.71066	3.83835	3.76215	3.25381	1.9451	2.90369	2.71718	3.15201	2.62733	2.82584	6.46257	3.27773	turquoise
JreChr02G10986	12.1401	8.36913	8.34738	3.37778	7.55488	4.58572	2.18567	2.21711	1.30523	0.442197	1.55497	1.00294	1.30532	1.10001	0.56378	1.8022	1.4545	1.69929	4.57236	3.0415	3.90636	7.13395	5.91644	8.85828	9.61888	5.17279	1.90267	1.00004	0.989703	1.652	3.84007	7.30289	7.95622	9.68013	0.239662	3.22574	3.688	4.13507	2.84717	1.30325	2.66486	3.81457	3.43108	1.49047	1.03257	0.801738	10.9937	0.606938	turquoise
JreChr02G10987	2.23242	2.17596	0.947716	0.872285	0.698824	0.039099	0.509233	0.004939	0.02337	0.6555	0.062233	0.622397	0.069312	0.941655	0.01062	0.719143	0.570183	1.32951	13.8274	6.97843	20.1494	18.7257	17.3255	25.899	1.78536	0.536736	0.179181	0.44671	0.340529	0.872945	13.6517	20.6501	9.94302	11.7731	10.5698	1.72802	1.8596	1.35608	0.914295	0.726961	12.5364	1.44012	1.87555	2.62831	1.5229	0.661133	2.49433	0.665378	blue
JreChr02G10988	19.6973	18.7197	21.2457	10.7147	14.4134	11.7825	14.7544	11.0466	9.16909	4.75545	7.3204	6.08335	4.9913	5.20792	5.22009	6.52068	6.71369	6.24459	5.82574	6.88027	5.51204	5.57483	5.24217	7.30489	19.8876	12.3035	11.6567	6.05306	5.13977	6.49299	6.07269	6.04063	7.33017	11.8508	7.76237	13.9364	12.1587	15.3369	11.9392	10.0476	9.54317	13.7022	12.052	10.4023	10.1347	10.2244	17.9967	4.90479	turquoise
JreChr02G10991	106.203	67.1614	55.1329	38.2474	46.8649	69.1101	26.7677	21.1397	47.7046	27.5847	14.4316	23.3136	19.0274	24.616	22.81	27.5139	27.6877	30.1931	29.6957	34.0207	42.2719	25.1173	23.6872	35.2004	76.1656	51.4075	31.8707	21.7766	22.1511	28.4649	35.3294	28.0016	29.9423	21.7337	26.8047	24.7419	71.2205	62.3684	53.4956	60.1409	62.6428	101.01	47.4409	93.4144	65.9625	70.9698	116.701	15.7568	turquoise
JreChr02G10993	138.633	125.228	151.228	189.636	180.293	302.027	136.748	158.783	155.767	102.282	81.981	107.281	135.136	134.437	138.695	258.054	204.479	267.462	144.183	194.623	128.481	48.3958	72.3582	122.13	138.363	223.985	150.432	97.1814	136.089	243.331	155.762	80.9615	37.7122	68.4518	114.84	241.362	30.3001	38.2667	37.2964	56.7871	39.7214	40.6287	41.7623	43.1842	51.0018	32.1401	174.735	73.9567	yellow
JreChr02G10996	16.4997	16.3772	17.0909	8.25348	10.466	11.5294	3.29971	3.03479	4.06456	4.37697	5.27507	4.47488	7.62163	7.11742	5.66336	14.2752	10.4292	12.247	6.34287	9.75621	5.2982	2.44656	4.44442	5.6612	16.6559	10.083	3.46636	4.70897	6.80081	12.3172	7.13242	4.18406	3.11068	3.41221	7.01849	7.46145	0.876889	0.839394	1.53149	2.04659	0.92947	0.0154073	0.00791267	0.027514	0.300797	0.110404	14.8463	4.6119	turquoise
JreChr02G11007	19.7595	28.0143	29.9199	8.09691	6.65284	9.60459	11.9401	13.1617	24.2039	3.02615	3.0054	2.67605	2.5786	2.6314	1.22043	0.548775	1.05725	1.03817	0.029569	0.004321	0.015	0.02012	0.019921	0.004645	25.8979	8.11811	16.4352	2.90253	2.14348	0.881398	0.0162967	0.0148953	0.034315	1.78842	3.4643	8.70991	3.29165	1.43548	0.118237	0.0682933	0.00287133	0.00298367	0.00683633	1.33273	0.685778	0.00472067	19.9823	3.89374	turquoise
JreChr02G11008	189.624	149.888	148.345	39.0191	70.9162	68.591	35.9454	30.8606	25.4615	45.5118	36.2551	48.6094	38.8557	31.2702	40.3034	90.8078	57.8976	115.095	86.4513	68.1564	78.6737	60.0598	68.2483	118.398	162.619	59.5088	30.7558	43.4588	36.8098	87.9334	77.7605	82.2355	149.598	103.152	42.8181	34.7169	172.563	80.1566	68.737	82.1784	109.616	331.152	310.715	301.311	272.441	251.504	209.468	29.8855	turquoise
JreChr02G11013	0.00576	0.00602	0.001575	0.405051	1.27201	0.964961	4.45588	3.76957	1.7926	0.109936	1.41984	0.732272	5.05775	4.01201	5.4348	19.4861	12.3068	18.0692	6.49126	15.722	11.3488	12.3562	12.6877	4.37345	0.00445167	0.880675	3.33935	0.754016	4.83485	16.6207	11.1873	9.80577	4.47194	2.02503	2.84233	1.46703	0.199042	0.410109	1.50353	4.39763	2.52465	0.00521233	0.129462	0.589496	0.616658	0.46534	0.00993533	2.27197	green
JreChr02G11017	37.3922	40.4233	42.3185	18.5032	27.687	27.4251	19.88	18.9556	17.604	24.5402	31.6662	25.5366	31.2784	27.4903	29.638	27.5607	32.2173	40.932	53.6284	62.9096	58.2307	61.9819	73.2054	71.3144	40.0447	24.5384	18.8132	27.2477	29.4689	33.57	58.2562	68.8339	44.4663	37.3124	21.7633	23.079	46.6974	60.6983	73.7442	81.2952	84.0634	53.0304	63.3891	42.8414	39.9134	51.1887	32.4798	18.3238	blue
JreChr02G11020	3.21462	3.45754	2.23325	0.072391	0.235205	0.278231	0.052985	0.041826	0.074528	0.067327	0.025126	0.019848	0.080638	0	0.041813	0.084036	0	0.023168	0	0.043584	0	0	0	0	2.96847	0.195276	0.0564463	0.0374337	0.040817	0.0357347	0.014528	0	0.054587	0.126743	0.0513	0.115364	2.94267	1.40759	0.972412	0.866329	0.478398	1.47656	2.06729	2.19592	2.04309	2.22554	2.62098	0.0149233	turquoise
JreChr02G11025	7.35309	31.0878	8.08132	10.18	4.33009	6.91418	10.1558	10.9448	28.1589	14.2062	11.819	39.1613	5.86388	10.9512	13.0034	17.2299	18.092	20.9273	20.7543	14.2637	23.3959	29.8266	28.5157	18.6902	15.5074	7.14144	16.4198	21.7289	9.93949	18.7497	19.4713	25.6775	54.5372	18.0576	29.0227	14.6513	11.4652	35.4035	49.5692	20.491	24.9922	24.6236	16.6657	15.9643	16.3947	14.7575	13.4281	7.65232	blue
JreChr02G11029	1.07018	1.14504	1.32583	0.764481	2.16132	1.29052	0.425499	0.354962	1.02473	3.41634	2.84021	3.19405	2.78946	4.76102	3.81257	5.56714	5.51804	6.11925	12.8947	11.7162	17.252	13.3392	13.8529	11.1409	1.18035	1.40544	0.601729	3.1502	3.78768	5.73481	13.9543	12.7777	8.57629	7.216	3.39739	3.53699	5.92491	0.286856	0.563149	0.896406	2.52384	37.8942	29.1073	7.80575	2.39842	1.94364	0.595676	3.12625	blue
JreChr02G11031	23.8249	24.031	19.1137	5.69474	6.31857	10.6337	6.51978	2.57447	6.36565	3.39869	4.04713	5.95302	5.65599	4.54801	5.0522	16.8788	12.1611	22.019	14.4196	14.0872	24.0235	14.0852	11.8426	26.5175	22.3232	7.54901	5.1533	4.46628	5.0854	17.0196	17.5101	17.4818	12.9611	13.0129	11.1579	8.77486	45.6854	31.9439	19.9811	24.3209	31.4795	97.2592	108.187	120.309	156.53	149.9	25.6619	6.12578	brown
JreChr02G11032	20.5679	16.3389	16.8927	11.6551	11.2547	17.1356	6.44846	6.20379	6.36497	6.07676	5.59159	6.24833	5.89236	6.92215	4.66568	6.92542	6.66495	6.40025	20.2067	0.760244	15.3507	0.3303	28.2233	8.56007	17.9332	13.3485	6.33907	5.97222	5.82673	6.66354	12.1059	12.3712	10.1727	13.3428	7.33422	0.376407	14.5218	14.9626	19.4786	20.7269	22.1599	18.5205	24.7803	15.3327	14.5542	13.994	16.7719	8.02224	turquoise
JreChr02G11034	0.832722	0.107586	0.226436	0.249578	0.207944	0.319023	2.89454	1.48407	5.6258	1.39815	1.87098	0.81755	5.46718	6.38964	7.93112	6.4526	4.02855	0.49108	10.0617	10.4578	30.6328	27.3927	31.6167	134.484	0.388915	0.258848	3.3348	1.36223	6.59598	3.65741	17.0508	64.4979	13.5874	42.5332	12.2327	0.234345	0.203799	0.231593	0.172072	0.178543	0.271652	0.131606	0.121934	0.0473353	0.110256	0.060744	0.95468	11.1066	blue
JreChr02G11040	1942.72	1475.11	679.768	10.3157	51.5347	14.2197	1.90553	6.38167	16.5567	7.62589	6.66506	1.10521	4.01515	9.76057	1.01039	1.54781	0.649906	0.585527	0.169015	0.003807	0.076555	0.196781	0.083984	0.180294	1365.87	25.3567	8.28129	5.13205	4.92871	0.927747	0.0831257	0.153686	5.96831	5.51055	1.00283	30.6823	0.144562	6.5332	0.218276	0.268447	0.209601	0	0.252577	7.82147	4.35023	1.49548	892.009	0.867108	turquoise
JreChr02G11051	160.771	110.686	85.7921	3.37885	6.35943	6.66858	3.78486	3.96948	4.7939	28.904	24.0932	30.8633	8.24506	24.2095	26.7598	27.8696	23.0333	37.6542	63.3216	51.1256	75.315	97.2456	88.3881	42.3478	119.083	5.46895	4.18275	27.9535	19.7381	29.519	63.2541	75.9938	33.1845	28.7834	46.3266	8.07764	57.2076	59.972	69.6141	33.7092	68.2604	51.4375	28.2208	14.9953	13.9036	26.5896	126.832	29.3051	brown
JreChr02G11063	21.2977	22.4617	20.0995	2.70669	4.23532	6.53291	2.19146	2.51751	2.1646	1.15779	1.31448	1.43963	1.5331	1.62812	1.55691	0.007369	0.781675	0.142356	0.007254	0.00391	0.256866	0.031541	0.024373	0.00435	21.2863	4.49164	2.29119	1.30396	1.57271	0.310467	0.0893433	0.020088	0.029097	1.94037	1.4239	2.59139	24.6635	2.53641	0.740542	0.416774	0.017165	3.33244	2.33024	3.05216	2.24431	1.79946	17.094	1.07875	turquoise
JreChr02G11067	28.5654	24.3162	23.0734	2.05179	2.48729	4.91026	1.62138	1.1332	1.76876	0.51964	0.117445	0.292374	0.646822	0.149183	0.011158	0.006576	0.276273	0.362686	0.022324	0.02922	0.028921	0.004405	0.005773	0.007187	25.3183	3.14978	1.50778	0.30982	0.269054	0.215178	0.0268217	0.00578833	0.982657	0.070849	0.435502	0.911576	14.3426	4.16725	1.1136	0.946994	0.157711	33.1517	12.611	22.4241	10.0316	16.8332	27.2832	0.160091	turquoise
JreChr02G11070	9.59842	14.7329	13.7026	10.8316	12.2262	12.0847	3.59104	3.85355	4.45437	5.98651	7.95775	6.74024	5.19082	7.38894	5.7809	10.7546	6.36268	10.0519	14.9271	13.0543	17.2556	15.6597	15.8676	21.1293	12.678	11.7142	3.96632	6.89483	6.12022	9.05638	15.079	17.5522	18.1747	13.9859	14.6779	7.96753	6.65293	8.82597	9.80931	11.1533	15.5273	10.8619	17.6864	7.59423	15.6196	15.5382	13.9483	4.71637	blue
JreChr02G11075	62.1411	56.6667	64.7305	39.8567	51.5731	46.7403	19.759	19.135	23.6917	26.9833	24.2406	31.6346	33.9986	25.3161	29.0388	49.9889	38.127	52.2259	21.7697	26.2354	18.1778	16.9514	21.5483	26.2451	61.1795	46.0567	20.8619	27.6195	29.4512	46.7806	22.0609	21.5816	38.0497	38.3435	35.3858	37.735	54.2802	18.3075	11.0212	14.8008	14.1584	28.0829	37.786	41.7077	26.7985	33.8663	58.7559	21.988	turquoise
JreChr02G11076	28.8887	38.5277	33.1194	16.4495	13.7103	0.211619	0.33958	0.369037	18.9831	11.0937	0.205733	11.6952	12.6168	10.5868	10.8236	0.208507	19.7588	20.385	17.2505	17.73	22.8732	22.8253	17.7247	23.1468	33.5119	10.1238	6.56392	7.66489	11.3424	13.4507	19.2846	21.2322	11.2774	13.8502	10.7028	15.1333	39.0037	58.9169	66.4071	74.9822	54.8383	65.6465	55.4757	68.849	62.4023	42.7924	31.5523	8.15045	brown
JreChr02G11085	38.4055	27.9508	22.9659	10.6717	12.9884	16.1169	4.75107	8.74244	9.09701	5.78989	3.94052	7.10816	8.6731	11.5165	9.31176	22.4117	13.3533	19.5524	10.8377	17.7802	13.4367	8.01378	13.2616	13.0849	29.7741	13.259	7.53017	5.61285	9.83378	18.4391	14.0182	11.4534	20.4326	16.6516	8.52739	10.8574	21.1471	29.9916	18.4434	25.6073	25.3752	14.0408	9.43984	15.1488	12.4909	18.9979	49.5797	6.19935	turquoise
JreChr02G11090	0.14089	0.170402	0.110954	9.43017	5.52723	5.3751	14.4864	13.5144	13.2385	11.754	10.8772	14.4408	13.0456	15.1116	13.2231	9.48817	9.13608	6.68561	3.02541	8.40282	7.27929	0.281912	1.05475	0	0.140749	6.7775	13.7464	12.3573	13.7935	8.43662	6.23584	0.445553	10.1791	21.4387	10.0452	14.1507	0.258655	0.552548	1.06717	0.525149	0.00459033	0.312862	0	0.023744	0.0633587	0.0190553	0.0797837	21.5521	red
JreChr02G11093	238.413	187.859	183.858	0.070844	83.9219	89.8363	60.7514	59.012	1.43191	74.9897	58.8907	72.5612	81.804	72.8351	82.5699	158.226	101.44	163.48	168.117	141.642	147.029	157.556	165.117	280.001	203.376	57.943	40.3984	68.8139	79.0697	141.049	152.263	200.892	167.362	160.536	93.1323	105.283	1553.07	1271.98	803.068	788.795	644.014	223.581	277.952	304.252	432.72	387.691	215.36	47.654	brown
JreChr02G11101	8.3786	6.50826	5.62917	4.34677	4.19916	4.08455	4.28177	3.48531	3.68125	7.28135	5.89521	7.69815	5.16558	4.82705	3.40556	10.7738	5.16929	13.8067	10.5126	6.96056	8.06019	18.7474	11.0444	16.9262	6.83868	4.21016	3.81611	6.95824	4.46607	9.91657	8.51112	15.5727	7.78507	10.2778	4.57883	6.96117	9.17202	10.7683	10.9821	12.1115	19.518	6.63046	6.69734	6.38657	8.70765	9.75621	6.62668	3.76275	blue
JreChr02G11103	310.536	283.919	266.749	1.17785	14.8852	23.7638	4.88108	1.02347	2.78207	6.81986	1.17346	0.599387	0.174778	0.284882	0.478167	3.25435	0.453568	3.33724	2.59407	0.758029	5.59493	4.36179	2.10235	1.14331	287.068	13.2756	2.89554	2.86424	0.312609	2.34839	2.98234	2.53582	0.779709	115.055	0	1.61004	19.9623	15.542	1.51931	0.444196	0.397331	25.6015	16.2604	41.63	29.436	15.1039	268.388	0.4862	turquoise
JreChr02G11104	15.9448	16.7744	12.0463	0	0.704676	0.558267	0	0	0	0	0	0	0	0	0	1.05066	0	0.458139	0	0	1.15435	1.68727	3.05408	1.1759	14.9218	0.420981	0	0	0	0.502934	0.384783	1.97242	15.3673	11.2716	0	0.003826	0.060665	0.0523307	0	0	1.10155	0.020841	0	0.0424087	0.132744	0.0460777	32.4977	0	turquoise
JreChr02G11106	4.46972	7.30514	7.9387	10.6469	10.9321	10.0674	4.29077	4.24545	4.18203	0.064073	0.06985	0.081693	4.17992	0.080745	0.071176	1.93583	5.62575	6.01061	3.60625	3.20468	4.36237	5.03112	7.75756	3.24708	6.57118	10.5488	4.23942	0.071872	1.44395	4.52406	3.72443	5.34526	8.03309	5.4337	4.85604	3.53767	8.79242	9.65887	1.38851	30.1889	14.6225	9.07385	5.57025	5.40094	5.02914	3.63632	10.8264	4.71007	turquoise
JreChr02G11115	176.28	168.593	228.045	377.29	383.135	284.785	268.688	223.394	287.321	199.481	323.096	250.616	263.444	293.063	251.717	276.579	255.081	225.992	472.073	427.202	383.03	472.743	436.794	545.906	190.973	348.404	259.801	257.731	269.408	252.551	427.435	485.148	966.57	826.271	303.209	8.63846	101.586	165.546	207.154	206.766	181.336	170.722	268.657	284.316	373.689	413.506	186.798	281.046	blue
JreChr02G11123	23.6535	22.9018	16.6683	17.5086	16.2688	16.3467	13.3572	14.2718	15.3947	5.52846	5.19357	5.6638	6.75138	9.84369	7.5956	11.864	9.93853	12.013	7.28703	7.04629	7.59043	10.1046	10.3455	15.098	21.0745	16.708	14.3412	5.46194	8.06356	11.2718	7.30792	11.8494	9.97265	12.8654	8.19102	14.0873	31.1954	17.9277	17.1666	18.9156	25.1223	32.8997	33.1029	35.2013	29.6797	23.7323	19.277	6.05952	turquoise
JreChr02G11125	28.5328	22.9128	20.5404	2.87734	6.3756	8.37819	2.16665	1.16014	1.38617	1.66426	0.940531	0.932505	0.588764	0.055125	0.209291	0.698037	0.104117	0.163896	0.15228	0	0.014184	0.08614	0	0	23.9954	5.87704	1.57099	1.1791	0.284393	0.322017	0.055488	0.0287133	2.10515	2.99906	1.26742	2.4194	16.2673	31.4808	34.5595	68.4007	44.5226	28.2024	14.1834	14.6066	18.7759	25.719	31.764	0.948667	turquoise
JreChr02G11129	1.47124	1.07131	0.932836	0.80662	0.925643	1.28572	0.736807	0.439116	1.0002	1.00384	1.00489	0.758596	0.677525	0.998069	0.127288	2.92388	1.94932	3.78436	3.99563	2.43109	3.60208	5.181	4.71441	4.32767	1.15846	1.00599	0.725374	0.922441	0.600961	2.88585	3.34293	4.74102	2.99402	2.48671	0.059396	0.850099	2.76209	1.77256	1.37018	1.86685	3.52882	2.01306	1.94889	2.98152	2.29783	1.87791	1.06207	1.04161	blue
JreChr02G11132	2.26233	2.03693	2.15755	1.60481	1.60305	1.32651	1.62719	1.87862	1.408	2.3318	2.79136	2.44303	2.9698	3.45262	2.40475	4.97302	3.98989	4.85639	11.6169	8.53242	10.2136	16.612	13.9379	16.7578	2.15227	1.51146	1.63794	2.52206	2.94239	4.60643	10.121	15.7693	7.67431	7.00021	3.54642	2.52939	8.43717	8.06977	9.22474	9.94455	17.7425	6.69978	5.37666	6.07092	5.62955	5.62723	1.7176	1.82345	blue
JreChr02G11136	9.91444	13.5599	13.7252	0.761047	1.07662	2.01182	1.57173	1.33995	0.469243	0	0.064588	0.019939	0	0	0	0	0	0	0	0	0	0	0	0	12.3999	1.28316	1.12698	0.0281757	0	0	0	0	0	0.060264	0.007375	0.195375	2.10734	3.26579	5.96308	5.15569	3.06463	3.31647	0.978134	0.244535	0.662474	1.15568	15.9225	0	turquoise
JreChr02G11137	7.47778	6.12129	4.70528	1.08413	1.5091	0.943411	1.77341	2.26363	1.22776	1.45275	0.996605	0.789912	1.559	0.678221	0.687849	1.75616	1.36213	2.78607	2.18266	1.76233	1.6538	2.7208	2.12239	3.65259	6.10145	1.17888	1.75494	1.07976	0.975023	1.96812	1.86626	2.83193	1.05953	1.11186	0.448744	2.15705	2.83	5.08119	4.9975	6.16551	6.68825	4.50784	6.18988	6.4541	7.56968	3.76323	9.05071	1.54446	turquoise
JreChr02G11146	4.52548	4.83936	6.20713	1.36538	2.00988	1.2463	0.376098	0.471825	0.41971	0.139972	0.636743	0.521039	0.336743	0.252353	0.272676	0.646066	0.036281	0.396657	0.296709	0.221168	0.432022	0.309515	0.112122	0.161281	5.19066	1.54052	0.422544	0.432585	0.287257	0.359668	0.316633	0.194306	1.34496	0.722165	0.126821	0.454911	15.3837	16.6599	6.99413	7.8905	4.36547	13.4178	18.7472	13.0465	17.6408	16.1031	4.19566	0.17611	turquoise
JreChr02G11149	17.9185	9.14575	9.39696	5.46429	10.2803	19.7406	2.00073	6.31968	11.4691	3.60982	4.18143	6.21426	8.5057	8.87737	6.8942	10.0613	7.41255	3.54228	2.04895	8.24816	5.24832	1.91629	2.10376	6.6133	12.1537	11.8284	6.5965	4.6685	8.09242	7.00537	5.18181	3.54445	0.900359	7.6949	9.15354	15.3632	4.95587	3.63755	2.38485	4.07732	2.62892	1.65472	1.97535	1.99264	3.28727	2.28764	15.465	6.22212	turquoise
JreChr02G11152	26.9565	42.6583	37.5776	16.6336	22.9613	17.4541	15.418	14.118	9.72123	9.028	9.92095	10.208	9.44211	10.3515	8.17932	21.4804	10.8967	24.5294	21.5029	18.6557	24.1088	20.3676	27.9422	21.9707	35.7308	19.0163	13.0858	9.719	9.32432	18.9689	21.4224	23.4268	21.6493	20.9939	6.82152	16.5987	44.5189	46.9108	26.1866	23.4557	17.2887	13.2013	21.2483	19.3596	16.6493	18.4817	27.2991	9.75419	turquoise
JreChr02G11159	39.2931	40.43	36.0411	16.9947	20.3924	22.7546	22.0994	18.712	19.6304	11.8627	12.1776	12.2434	11.6405	12.9975	12.0476	18.5618	13.9733	19.2619	16.2208	15.9512	16.3714	19.5767	18.8355	20.2731	38.588	20.0472	20.1473	12.0945	12.2285	17.2656	16.1812	19.5618	22.685	23.4838	15.0439	18.6865	38.6471	37.1185	32.625	30.6791	25.3836	36.6194	39.2817	52.4043	49.9473	50.9377	36.7343	15.0359	turquoise
JreChr02G11162	54.2792	55.5084	45.3059	14.9715	16.3793	21.4171	19.4403	10.7118	20.6231	13.0381	13.5316	14.9568	14.8239	16.0865	16.6331	18.9658	16.0269	18.7205	33.8469	27.5191	37.5778	49.9722	47.1527	52.1425	51.6978	17.5893	16.9251	13.8421	15.8478	17.9044	32.9813	49.7558	45.3422	35.0638	20.6497	16.8571	49.3501	52.6533	68.4126	43.7039	56.685	46.986	35.2828	36.8154	36.8313	38.1199	47.1406	19.0721	brown
JreChr02G11170	3.5424	2.62278	2.5106	4.78187	4.59972	2.40725	2.52631	3.16405	1.81976	4.94346	4.70061	5.24725	6.97013	3.54367	5.40833	14.0797	14.6057	20.9354	21.5333	14.9401	18.0056	32.1372	28.9269	8.88059	2.89193	3.92962	2.50337	4.96377	5.30738	16.5402	18.1597	23.3149	10.1126	6.84384	12.4494	5.18087	10.8208	9.37747	5.56166	7.24311	12.0103	11.1653	6.82825	6.78303	6.79128	3.74704	3.6061	9.68501	blue
JreChr02G11172	26.1275	33.0852	0.004861	0.004662	0.009195	18.6336	0.00741	0.003433	0.116454	0.003404	0.029771	0.186033	0.268634	0.085925	0.002905	0.055142	0.030373	0.028361	0.047515	0.05962	0.015127	0	0.000196	0	19.7392	6.21581	0.0424323	0.0730693	0.119155	0.0379587	0.040754	6.53333e-05	0.005397	0.243451	0.007051	0.00529	164.517	14.2665	0.037504	0.277328	0.031134	0.00637867	0.0206163	0.00885367	0.00520367	0.005035	29.2974	0.0446943	turquoise
JreChr02G11180	16.0268	11.3011	6.33553	1.05238	0.848458	0.766295	0.005068	0.00527	0	0	0	0	0	0	0.004315	0.000497	0	0	0	0	0	0	0	0	11.2211	0.889045	0.003446	0	0.00143833	0.000165667	0	0	0	0	0	0.010044	12.2726	1.03087	0.008682	0.00351	0	0.00810633	0.00419867	0.013956	0.0363037	0.00650733	8.71796	0	turquoise
JreChr02G11183	4.43102	2.21559	2.80731	0.535181	0.826649	1.16744	0.574164	0.014049	0.02602	0.068365	0.000675	0.01799	0.012009	0.022081	0.0021	0.032431	0.006781	0.032439	0.052142	0.02184	0.01099	0.119603	0.049176	0.036963	3.15131	0.843088	0.204744	0.02901	0.0120633	0.0238837	0.028324	0.0685807	0.023148	0.081154	0.076873	0.17047	2.19371	2.66184	2.8605	2.00422	1.22445	0.112147	0.256638	0.652787	0.479385	0.321638	2.22121	0.00719933	turquoise
JreChr02G11184	8.59287	9.81918	9.22873	2.45335	2.80978	3.0508	0.008671	0.236807	0.62324	0.945673	0.649575	0.003882	0.139263	0.006564	0.002312	0.069484	0.12213	0.533728	0.000359	0.001102	0.000196	0.007278	0.001265	0.00021	9.21359	2.77131	0.289573	0.533043	0.0493797	0.241781	0.000552333	0.00291767	0.02938	0.843926	1.29994	1.46851	15.651	8.0603	4.34533	2.72976	38.7265	2.49154	0.42804	1.38566	0.385916	0.221415	6.94304	0.697082	turquoise
JreChr02G11188	7.07033	8.47574	7.56586	3.67181	3.26396	5.19344	4.82372	1.98012	3.08519	3.08123	3.21017	0.697561	0.28588	2.45618	1.42502	7.45739	4.42928	7.17274	8.91331	6.16058	6.08021	15.9968	11.0682	7.44777	7.70397	4.04307	3.29634	2.32965	1.38903	6.35313	7.05137	11.5043	9.68777	8.2024	6.44841	6.33826	9.55492	10.0642	12.133	11.7727	17.406	5.38052	6.85929	8.50426	7.39056	4.76225	7.02629	2.44093	brown
JreChr02G11189	10.9049	12.5275	12.0357	6.39139	4.20061	6.55569	5.52824	5.52582	5.08908	3.67274	2.76575	3.35882	1.82001	4.03871	1.52314	3.07154	2.00669	3.07786	4.74982	5.46671	4.29515	9.01718	9.23291	0.890451	11.8227	5.7159	5.38105	3.26577	2.46062	2.7187	4.83722	6.38018	19.3965	23.6358	6.50951	7.12924	8.29381	9.69971	10.8367	8.47997	14.7575	5.39831	3.85793	5.26955	5.7347	5.76342	8.81314	4.60596	turquoise
JreChr02G11197	15.5439	15.8029	12.9251	3.01116	2.77025	2.53273	3.14555	3.42498	1.93722	5.63511	4.64506	4.42452	2.49162	2.29478	3.13126	3.06043	3.06737	5.78031	4.86503	5.09543	5.23623	7.71696	9.90242	10.3516	14.7573	2.77138	2.83591	4.90156	2.63922	3.96937	5.06556	9.32366	19.0869	9.5444	5.00124	1.4645	4.71615	2.7175	1.3889	3.11059	7.49539	1.05689	0.263647	0.416182	0.135146	0	19.2836	3.07685	turquoise
JreChr02G11204	6.88481	39.7706	36.6947	20.3992	23.663	18.5443	15.7063	18.1348	19.5631	29.318	31.3242	32.7331	29.9046	31.9335	0.091273	27.6707	28.5531	30.4824	65.6904	48.9642	62.6775	94.6934	80.5898	104.227	27.7834	20.8688	17.8014	31.1251	20.6431	28.9021	59.1107	93.1702	72.769	77.9262	31.6939	27.1325	35.7377	38.3217	56.6052	41.0486	63.5045	53.6487	32.5497	44.9811	34.5651	34.3794	36.2118	28.5175	blue
JreChr02G11206	31.4997	22.2481	42.1177	24.19	26.152	26.8487	12.2304	12.0952	10.3596	9.55119	5.27515	11.9851	15.2617	15.9799	11.0839	11.2623	17.7258	22.245	33.6017	26.0623	22.5684	37.0014	33.1204	48.2824	31.9551	25.7302	11.5617	8.93713	14.1085	17.0777	27.4108	39.4681	38.0576	20.8896	17.2318	20.7133	38.4355	32.2291	22.8549	29.8065	31.866	28.3271	30.2122	33.1736	25.1387	22.7124	35.1233	7.95251	brown
JreChr02G11220	22.7885	10.078	21.8457	10.7644	15.0227	9.58624	0.07365	0.081341	9.34474	4.50283	6.6625	4.18802	7.47427	0.077398	8.32797	10.7743	7.15567	11.8737	1.18137	14.4088	27.1466	19.2983	16.694	4.99018	18.2374	11.7911	3.16658	5.11778	5.29321	9.93457	14.2456	13.6608	13.402	14.154	0.604621	2.44374	24.0774	24.221	26.9343	27.6893	13.0755	15.0249	16.2728	14.7164	12.0986	11.9367	20.3459	7.75406	brown
JreChr02G11221	2.01637	1.56534	2.26143	1.27561	0.137277	0.136273	0.099292	4.41166	0.264288	21.8259	0.27901	0.15502	40.799	0.256746	1.41138	0.247624	0.610964	0.301065	0.754564	0.499377	0.516368	0.497596	0.302847	0.176307	1.94771	0.516387	1.59175	7.41996	14.1557	0.386551	0.590103	0.325583	0.521125	0.106731	0.591218	46.7707	0.481202	12.5147	0.603757	1.69339	9.60915	3.76798	4.05407	8.43448	8.78066	5.7213	0.537094	0.152892
JreChr02G11224	9.51497	8.30234	7.52631	3.14504	2.7512	2.46393	0.304599	0.931557	0.521303	1.07335	1.02005	0.401176	0.812163	0.122944	0.215287	2.53473	1.71887	2.45719	0.556001	0.949235	0.477645	0.010807	0.016627	0.80252	8.44787	2.78673	0.58582	0.831527	0.383465	2.23693	0.66096	0.276651	1.97725	0.578564	0.586851	3.82268	0.217112	0.0496623	2.40927	7.68894	15.3045	0.002056	0.000732667	0.008348	0.01802	0.003434	6.65118	0.467942	turquoise
JreChr02G11225	7.3948	3.7605	5.92367	18.8831	14.2276	17.5275	18.6108	19.0347	13.9503	15.8383	12.7303	19.0148	14.9475	10.0713	14.1239	21.9917	19.6076	21.5184	4.78606	9.36124	4.2299	0.882284	3.05341	3.06475	5.69299	16.8794	17.1986	15.8611	13.0476	21.0393	6.12573	2.33348	0.129588	9.58526	15.5116	15.6313	2.3374	3.05888	2.21279	2.67876	0.0102553	0.389768	0.009337	0.456636	0.005422	0.001613	6.9372	15.2403	red
JreChr02G11230	5.24577	5.82979	2.92609	0.15708	0.038545	1.15728	0.017781	0.138602	0.086102	0	0.000255	0.007556	0	0	0.043663	0.012983	0	0	0.028141	0	0.013392	0.016411	0	0	4.66722	0.45097	0.0808283	0.00260367	0.0145543	0.00432767	0.0138443	0.00547033	0.099587	0	0	0	2.14771	0.0924297	0.00479033	0.0171103	0.0169087	0.0579043	0.0610817	0.148497	0.0516903	0.00461167	3.48486	0	turquoise
JreChr02G11231	3.04578	3.17398	5.14305	20.3868	16.9888	7.31372	8.32663	9.78514	6.6277	23.3751	18.979	20.1292	18.9369	19.7919	19.212	13.2422	21.3656	14.3946	13.015	10.1707	15.4303	7.86128	7.06043	4.53254	3.7876	14.8964	8.24649	20.8278	19.3136	16.3341	12.872	6.48475	11.9351	15.5396	24.0769	25.6107	1.2161	0.453577	2.52085	1.28818	0.99037	0.0529553	0.0481367	0.0567367	0.009655	0.0164387	3.58763	17.2122	green
JreChr02G11236	52.5285	46.6827	55.3596	45.2597	68.3371	72.6916	100.96	109.198	81.0987	199.141	160.715	148.482	54.4069	87.0257	110.622	169.06	101.164	172.955	68.693	0.135237	65.3751	83.5721	121.307	135.715	51.5236	62.0961	97.0857	169.446	84.0182	147.726	44.7345	113.532	109.795	183.5	144.71	95.6648	79.9018	226.783	237.359	219.533	141.117	67.6092	63.8595	93.1336	120.321	99.565	54.334	170.88	green
JreChr02G11237	0.101462	12.7871	0.141503	10.1859	15.1737	13.0102	11.2802	11.7535	13.4958	11.7372	0.141215	0.159239	14.9287	15.997	16.0178	0.179153	19.1068	14.1929	0.653895	0.135623	9.00743	16.9668	30.0783	23.5344	4.34336	12.7899	12.1765	4.01254	15.6478	11.1596	3.26565	23.5265	20.8851	0.164792	13.8757	15.9865	11.6184	5.91212	7.24968	8.39012	11.9796	4.26651	7.38972	13.3009	5.41613	7.47239	5.47459	14.9326	blue
JreChr02G11238	9.35292	8.23526	7.35741	4.35184	5.70511	4.71516	2.77132	2.66298	3.43534	4.9106	4.82349	5.36517	3.56998	3.56282	4.18786	5.73571	4.70824	5.06802	12.5581	8.84682	13.6208	16.023	15.8078	18.7543	8.3152	4.92404	2.95655	5.03309	3.77355	5.17066	11.6752	16.8617	15.5276	12.8114	7.60792	3.21836	3.06093	4.07061	5.75399	5.89805	14.0347	2.70637	4.29721	5.63813	4.25953	2.42103	7.55751	4.64369	blue
JreChr02G11239	9.23396	9.93674	9.52208	7.247	10.0791	8.26125	4.26074	4.97928	5.20909	10.1445	9.82787	10.6169	10.6513	13.2732	10.4129	8.03281	7.75365	7.99439	16.0097	15.3076	19.0213	25.2469	26.6858	32.3421	9.56426	8.52913	4.81637	10.1964	11.4458	7.92695	16.7795	28.0916	10.9154	13.713	12.186	9.12449	10.6649	14.5101	18.2065	15.8469	22.1297	7.98452	11.0315	9.17687	9.66583	8.49728	8.74347	4.85589	blue
JreChr02G11247	43.8259	6.0608	37.5309	5.30829	24.9381	4.55542	19.3784	22.6547	5.29303	4.3685	10.8917	2.9917	14.7769	4.83881	14.3455	23.9305	18.6522	29.0375	34.1577	5.94099	34.2618	40.2311	42.0423	60.3273	29.1392	11.6006	15.7754	6.08396	11.3204	23.8734	24.7868	47.5336	27.5495	26.2588	17.5424	6.19837	47.6315	29.0125	44.1912	37.3917	36.3114	46.4582	55.5832	30.8254	61.75	47.4969	43.1719	16.8441	brown
JreChr02G11256	10.2091	9.50715	8.14397	0.289178	0.283781	4.14243	0.196351	0.581207	0.174322	0	0	0	0	0.073258	0	0	0	0	0.059482	0	0	0	0	0	9.28673	1.5718	0.317293	0	0.0244193	0	0.0198273	0	0	0	0.063079	0.113482	3.07176	0.913614	0.203582	0.0953743	0.0377733	0.772116	0.308967	0.412122	0.448319	0.146531	11.4106	0.0357597	turquoise
JreChr02G11262	110.006	168.809	140.809	12.9214	34.0694	26.4139	26.9681	19.6402	0.854058	1.59061	2.35412	3.95319	1.15582	1.81392	1.39108	2.20937	3.8305	5.23987	3.07932	0.55942	1.59299	1.13526	8.5752	1.9267	139.874	24.4682	15.8208	2.63264	1.4536	3.75991	1.74391	3.87905	38.3895	11.6218	14.7691	4.79681	1078	299.396	15.4757	9.9838	1.13819	166.725	65.71	25.3812	22.929	10.136	88.1329	0.300675	turquoise
JreChr02G11265	30.499	26.6092	27.909	15.8004	21.0363	18.3931	9.96668	11.4197	9.66177	7.80316	8.12449	9.70379	5.64445	6.40982	6.71665	8.72803	5.68233	8.44085	8.67695	8.04623	10.9321	13.7169	15.3018	14.7631	28.3391	18.4099	10.3494	8.54381	6.25697	7.61707	9.21842	14.5939	14.672	15.5253	9.58616	12.82	23.3486	14.6025	14.7479	14.2131	20.1548	29.1172	31.9276	27.5813	22.6333	22.0467	25.3913	7.37496	turquoise
JreChr02G11276	133.54	142.549	115.581	85.4272	90.7989	105.429	83.9198	77.7578	75.3892	49.9856	50.424	47.2635	66.0124	64.9113	63.8213	73.5473	60.4691	67.8834	120.574	85.1557	128.772	96.3831	114.816	147.196	130.557	93.8852	79.0223	49.2243	64.915	67.2999	111.501	119.465	76.1722	79.5885	62.4887	69.5306	77.923	75.4085	72.5376	72.8258	83.467	88.4848	82.3877	80.2138	60.1968	59.8177	135.922	60.5358	brown
JreChr02G11281	13.5242	26.9647	24.5816	31.0599	20.2705	17.0846	33.7746	27.6936	24.4738	13.8465	19.3318	11.6059	23.104	26.8821	14.3612	27.6919	28.0147	22.263	62.6929	54.3067	51.2318	76.7299	119.7	23.3439	21.6902	22.805	28.6473	14.9281	21.4491	25.9899	56.0771	73.2579	85.2415	71.3981	30.9502	24.6721	19.0438	22.154	12.3524	24.3375	77.167	54.8749	36.1046	50.122	31.5461	23.2369	9.98003	17.8969	blue
JreChr02G11289	16.5951	19.421	11.9571	7.87471	7.99904	11.3506	8.10302	8.22374	9.31783	4.92802	3.27167	4.72483	5.05015	3.16752	3.99429	8.70531	8.47585	9.46253	15.3613	8.34116	17.3228	14.0699	9.69606	8.11213	15.991	9.07477	8.5482	4.30817	4.07066	8.88123	13.6751	10.626	2.95279	9.34563	3.27832	11.584	7.88234	4.87075	4.876	6.25429	8.38268	7.51903	8.07927	9.61479	7.66028	8.56554	14.6206	4.77823	brown
JreChr02G11294	397.539	433.901	490.335	239.418	269.736	245.771	307.561	268.013	296.793	166.498	151.121	116.127	162.679	152.131	3.4358	155.741	181.973	149.988	147.401	223.973	178.278	234.162	278.371	247.864	440.592	251.642	290.789	144.582	106.082	162.567	183.217	253.466	287.87	410.864	232.4	257.329	321.668	471.785	521.998	540.712	462.84	501.284	730.298	477.007	235.5	401.645	327.992	181.427	turquoise
JreChr02G11296	6.17528	4.79548	4.45854	1.64118	1.48297	0.880042	1.81255	1.22521	1.13542	4.13365	3.32001	3.36979	2.4099	2.48506	2.21084	6.08717	3.57058	7.16024	9.34289	7.58092	8.56682	14.9405	14.1654	10.0621	5.1431	1.33473	1.39106	3.60782	2.3686	5.606	8.49688	13.056	9.26292	6.66241	5.41309	2.92271	18.9792	23.015	21.1207	21.0068	31.5804	37.763	46.9041	38.7267	37.4687	44.8386	4.77265	1.94786	blue
JreChr02G11298	129.381	96.7387	87.5969	40.7183	49.0049	51.6963	23.3086	20.4866	23.3301	47.2784	44.5708	48.9438	76.3857	79.5685	78.6137	75.6693	46.0138	82.9873	61.5246	75.7908	64.3477	57.9709	74.071	66.3667	104.572	47.1398	22.3751	46.931	78.1893	68.2235	67.221	66.1362	34.3874	0.34622	367.168	33.2977	86.9502	81.9105	83.6554	63.0732	80.5911	77.3061	72.4508	52.6752	58.3189	89.828	119.166	39.3334	turquoise
JreChr02G11304	30.3587	17.8363	39.404	0.003421	3.28565	9.42591	0.001518	0.001243	0.002903	0.000284	0.000571	0.004529	0.000289	0	0	0.002856	0.001196	0.001727	0	0	0	0	0	0	29.1996	4.23833	0.001888	0.00179467	9.63333e-05	0.00192633	0	0	0.000517	0.008806	0.005055	0.009871	8.48903	3.32669	2.93014	3.93714	3.41364	0.0143697	1.0057	5.05868	0.929933	0.00176067	29.6615	0.00115167	turquoise
JreChr02G11309	55.2249	61.1247	49.0219	23.7071	29.7018	1.18611	18.4147	19.297	22.9791	18.3136	24.2657	19.7672	16.6666	19.0892	20.3223	22.2056	19.002	21.6439	29.0294	25.9221	31.2869	30.6665	33.5028	25.547	55.1239	18.1984	20.2303	20.7822	18.6927	20.9505	28.7461	29.9054	43.133	41.9287	26.264	20.0799	36.9393	33.4651	36.1623	24.4807	25.224	36.961	32.4737	31.9507	47.2444	50.9495	56.8213	17.9698	turquoise
JreChr02G11315	5.82955	6.88973	7.11825	0.146115	6.57499	6.17223	3.10609	4.91063	2.10555	2.49194	3.06495	1.38354	2.61991	2.25753	2.0806	3.52365	2.49217	5.60482	7.58355	5.20898	6.32044	11.3199	11.9369	10.2008	6.61251	4.29778	3.37409	2.31348	2.31934	3.87355	6.37099	11.1525	5.78956	4.93859	4.82124	5.09974	7.65547	10.0597	10.1081	11.1041	10.9247	8.04468	9.29083	9.34347	8.11821	8.90973	5.91555	4.68238	blue
JreChr02G11320	1.64223	0.523498	0.87374	1.29787	0.881396	0.612596	6.00854	4.12617	13.7043	2.80911	2.8899	3.37017	10.836	6.99951	9.21794	20.3817	34.688	23.473	29.2009	12.2598	28.376	45.4998	22.61	48.5389	1.01316	0.930622	7.94633	3.02306	9.01783	26.1809	23.2789	38.8829	8.07856	8.15332	3.51802	3.67505	1.91889	27.1981	100.356	135.48	32.1525	16.1315	5.99349	17.5034	20.6698	14.967	0.728758	3.86046	blue
JreChr02G11325	20.4628	16.5679	19.0596	14.0153	12.6239	11.5855	8.37655	8.49631	8.8486	6.63458	6.41514	6.51948	4.88485	4.53882	6.31059	7.98623	5.89652	8.02178	7.16575	7.28518	9.10885	9.1685	9.61839	3.5784	18.6968	12.7416	8.57382	6.52307	5.24475	7.30151	7.85326	7.4551	4.89745	6.39962	5.52672	10.2292	16.7042	10.9927	11.5163	11.8989	8.8216	17.5254	16.5489	15.1946	14.5469	13.4542	16.9011	7.0138	turquoise
JreChr02G11329	0.003346	0.005564	0.010027	0.000617	0.006066	0.003117	0.000378	0.001821	0.00315	0.833296	0.002397	1.58127	0.009176	0.008201	1.54422	2.44575	1.02528	2.19792	1.45805	1.15776	1.32445	4.54153	3.68782	3.61386	0.00631233	0.00326667	0.001783	0.805654	0.520533	1.88965	1.31342	3.94774	0.000236	0.004357	0.001503	0.002928	3.51353	8.36657	14.8715	18.9175	8.52609	1.61817	1.67485	2.03782	2.67746	2.37154	0.00334367	0.000471667	blue
JreChr02G11333	0.000834	0.002604	0.002817	0.424994	0.851981	0.004039	3.69617	0.007067	0.001537	0.013151	0.001958	0.000925	0.004509	0.012791	0.001945	1.48027	1.10758	0.007428	1.86799	1.61875	1.57867	1.71232	5.04991	1.50568	0.002085	0.427005	1.23492	0.00534467	0.006415	0.865093	1.68847	2.75597	0.000603	0.006	0.623659	0.674403	1.03851	7.69441	5.16814	5.01844	3.5778	0.012727	0.009233	0.0130763	0.012002	0.00313433	0.00627567	0.002189	blue
JreChr02G11349	3.69756	0.392658	0.277203	0.763196	0.472311	0.821011	1.73613	0.248447	0.829607	15.9123	2.94017	1.96304	3.92862	5.17763	7.11942	2.76587	1.136	7.47276	11.7366	15.162	21.6486	31.6893	32.966	40.398	1.45581	0.685506	0.93806	6.9385	5.40856	3.79154	16.1824	35.0178	33.8367	23.3984	35.3065	1.14341	24.0328	29.5832	29.1859	19.8449	18.3988	11.2396	24.5638	25.5925	5.32441	51.8764	1.42443	3.61569	blue
JreChr02G11354	12.2887	15.5609	14.2264	7.04442	10.6537	8.93679	6.67843	6.22595	8.06384	10.001	6.20566	8.88625	7.54879	7.59791	10.379	17.0133	15.2209	15.3056	27.8543	16.7611	26.0994	23.0677	18.3872	22.6743	14.0254	8.87831	6.98941	8.36429	8.50858	15.8466	23.5716	21.3764	6.91656	9.4239	8.76291	11.7636	1.31497	2.23999	2.81673	5.90276	6.54573	0.174233	0.00330633	0.003146	0.004175	0.000682333	14.7511	9.82268	blue
JreChr02G11362	4.69127	2.87862	4.20856	5.69186	4.24765	2.98177	7.29551	6.95362	15.1233	31.7079	26.8453	30.3537	16.0267	17.764	24.9476	26.2308	18.2242	27.6857	99.4844	56.1449	91.9137	159.102	116.701	81.266	3.92615	4.30709	9.7908	29.6356	19.5794	24.0469	82.5143	119.023	200.773	146.645	30.9106	15.8157	22.3259	64.8819	56.9956	34.9139	112.238	69.1112	58.9822	45.7472	48.1176	39.7796	3.37467	10.2513	blue
JreChr02G11365	2.62699	3.33048	2.86589	1.05182	1.32962	1.63811	1.69962	0.910987	0.43973	0.088798	0.399627	0.07797	0.70592	0.682761	0.58182	0.591215	0.798725	0.399189	0.132983	0.013528	0.254668	0.138667	0.093474	0.041874	2.94112	1.33985	1.01678	0.188798	0.656834	0.596376	0.133726	0.0913383	0.597048	0.744884	0.099686	1.03819	1.68772	0.613207	0.701636	0.885453	0.65698	0.345656	0.428886	0.68398	0.414253	0.161468	2.10751	0.491597	turquoise
JreChr02G11372	1.02441	0.698164	1.4864	47.8107	24.3895	23.2927	109.676	107.768	74.8781	39.4304	33.6646	37.3322	58.2162	58.3608	22.2836	132.352	87.3222	116.401	132.786	114.817	116.794	158.446	148.001	194.674	1.06966	31.8309	97.4407	36.8091	46.2869	112.025	121.466	167.04	71.1747	63.0408	69.7898	40.7644	0.023229	5.27131	18.6634	72.5257	145.613	0.0121923	0.0165547	0.002315	0.138299	0.03735	1.2362	50.5931	blue
JreChr02G11374	6.43108	9.18486	9.32656	1.64523	0.686441	2.31454	2.31807	2.63201	1.24191	1.85292	2.19516	1.89228	2.09728	1.93594	3.35921	2.42291	2.27747	1.77495	2.39152	3.43112	2.66241	2.3942	2.81484	1.97187	8.31417	1.54874	2.06399	1.98012	2.46414	2.15844	2.82835	2.39364	1.42405	1.87594	3.13726	1.39615	24.3643	17.7405	9.21933	7.29371	5.35438	12.1305	11.1523	15.359	11.9228	5.8923	7.73951	1.43172	turquoise
JreChr02G11377	20.4496	0.082949	0.131348	0.220415	18.6682	0.395372	17.5256	20.1896	19.5259	15.6164	14.0502	0.093141	19.5266	26.2846	18.7335	29.378	0.087957	0.049039	50.3158	0.046591	47.4679	72.6983	69.4608	97.3096	6.88795	6.42798	19.0804	9.91993	21.5149	9.83832	32.6101	79.8229	52.5203	0.147647	0.100799	0.076371	35.9043	42.6925	39.9545	33.0078	72.9464	37.7979	36.4339	35.7114	38.3194	42.0884	22.778	22.1285	blue
JreChr02G11388	1.94385	4.41819	4.82291	0.520349	0.86945	1.91032	1.61736	0.687113	0.935073	0.522612	0.794891	0.485445	0.411633	0.223744	0.504855	0.997453	0.511509	1.13222	0.352406	0.286587	0.584554	0.235793	0.273611	0	3.72831	1.10004	1.07985	0.600983	0.380077	0.880393	0.407849	0.169801	1.46291	1.84318	0.371148	0.502908	6.05936	7.9131	11.1924	8.14739	6.20403	12.0564	8.24618	11.1942	11.3876	14.3734	4.48702	0.337481	turquoise
JreChr02G11398	25.9803	45.1769	45.9562	8.45222	7.34215	6.68087	9.2638	10.2031	6.60388	4.16061	4.58624	2.90952	2.62605	4.49206	2.17631	2.03596	4.3357	3.61302	17.2062	10.6679	25.2952	19.431	27.1833	21.0199	39.0378	7.49174	8.69026	3.88546	3.09814	3.32823	17.7231	22.5447	49.552	25.3897	6.01809	2.31337	0.663948	17.7322	2.6794	8.01236	124.661	0.0019	0.208488	0.481587	2.21042	0.581369	26.2972	1.82091	turquoise
JreChr02G11399	30.4181	13.082	12.494	15.7201	14.8233	0.463958	15.2893	1.86679	11.0779	1.51677	8.72852	2.97614	3.79434	2.58675	0.930637	0.331796	0.083033	0.225463	2.77843	0.241297	2.03214	0.551361	0.794342	0.389076	18.6647	10.3358	9.41134	4.40714	2.43724	0.213431	1.68396	0.57826	3.76731	15.4529	12.6722	8.81099	21.0151	14.9317	46.9677	39.4183	0.709351	30.7796	31.785	28.1664	22.6091	8.94363	21.2579	19.6115	turquoise
JreChr02G11403	34.4245	21.4395	21.5102	24.6327	33.7544	22.4314	12.6616	14.5395	1.07831	3.36461	12.0594	5.44833	4.33932	3.6536	4.35189	6.47862	3.74322	4.87344	2.6815	4.74487	1.7539	0.525186	0.324097	1.53595	25.7914	26.9395	9.42647	6.95743	4.11494	5.03176	3.06009	0.795079	18.0475	8.67429	10.1984	34.298	0.01013	0.759189	0.462066	1.10443	0.17065	0	0	0.170914	0.287636	0.119469	32.6776	3.50306	turquoise
JreChr02G11404	6.89874	6.624	7.97287	2.60599	3.56577	2.26669	0.992178	1.40162	0.591142	1.15064	0.645591	0.896667	0.182566	0.43852	0.471704	0.357151	0.249665	0.081637	0	0.066919	0.159264	0	0	0	7.1652	2.81282	0.99498	0.897634	0.364263	0.229484	0.0753943	0	0.943739	0.282356	0.178017	2.58562	0.0405123	0.0952633	0.178261	0.104135	0	0	0.036585	0.158026	0.0438323	0.130772	5.6773	0.230631	turquoise
JreChr02G11422	11.3491	7.85744	7.53009	2.98118	4.04944	2.13854	1.23909	1.33337	0.773346	1.28285	1.27983	1.64309	0.853836	1.05871	0.360152	1.24823	0.824831	1.09482	2.61563	1.51327	2.05857	1.34154	2.10605	0.464479	8.91221	3.05639	1.11527	1.40192	0.757565	1.05596	2.06249	1.30402	10.6782	4.05174	1.23267	2.45362	7.59981	2.36905	0.759736	1.16011	0.868601	2.35926	1.48199	2.30064	1.31643	0.708014	7.44586	1.00101	turquoise
JreChr02G11423	6.33332	4.73122	4.63685	1.77887	2.75419	2.58869	3.42036	2.05178	1.67602	1.48983	1.01952	1.31183	1.08261	1.7977	0.911593	2.20441	1.90992	2.42129	3.90941	2.17941	4.47047	8.25006	6.02171	8.5643	5.2338	2.37392	2.38272	1.27373	1.26397	2.17854	3.51976	7.61202	3.99051	2.7153	2.89483	3.28475	11.6068	10.5258	7.567	9.41158	9.39393	11.0855	11.43	9.87047	6.26091	10.5305	4.05153	1.84218	brown
JreChr02G11432	33.4731	26.6242	41.3797	0.046041	0.624602	0.485856	0	0.025071	0.26574	0	0	0.014747	0	0.031765	0	0.025594	0.041504	0.046382	0.022428	0	0	0	0	0.018403	33.8257	0.3855	0.096937	0.00491567	0.0105883	0.0378267	0.007476	0.00613433	0.230949	0.037668	0	0.013486	14.902	2.32984	0.104054	0.014928	0.004565	9.96531	0.279782	0.162985	0.187725	0.010882	26.4557	0	turquoise
JreChr02G11435	16.3927	15.0636	12.2707	5.36959	4.48632	7.73746	7.46399	6.47663	5.64244	1.43518	0.10686	1.48086	0.851801	1.64845	2.39973	5.3893	3.94007	6.33674	9.75535	6.76509	10.1306	8.84428	7.75523	9.68228	14.5757	5.86446	6.52769	1.00763	1.63333	5.22204	8.88368	8.7606	0.300565	3.48363	1.63815	5.83157	4.26218	1.1019	1.70566	4.8343	3.41003	0.841816	0.0619303	0.442361	0.209537	0.0119883	10.0451	1.6862	turquoise
JreChr02G11449	6.72824	6.74664	6.20172	1.06919	6.66324	7.256	4.92549	3.63188	5.79356	1.31918	1.05876	0.855591	0.692539	1.20845	1.13406	3.40961	1.89	0.773795	2.37341	2.03844	1.40452	0.806406	2.73086	0.00945	6.55887	4.99614	4.78364	1.07784	1.01168	2.02447	1.93879	1.18224	0.00157	1.60059	2.34271	4.46593	5.29782	12.6807	0.00293833	0.841116	2.39312	13.0713	12.7186	16.9147	9.5606	5.00271	6.23449	1.70866	turquoise
JreChr02G11450	0.20793	6.94115	46.3097	0.265853	0.189087	7.9653	93.127	0.228874	82.6435	0.143243	0.256856	0.186601	10.422	0.220629	0.594811	0.459627	0.405721	24.8454	0.49863	0.231556	26.8977	32.6332	25.3768	1.60237	17.8196	2.80675	58.6665	0.195567	3.74582	8.57026	9.20929	19.8708	41.5729	48.7592	0.177015	0.200094	0.165734	25.5192	10.9651	0.264482	22.3687	0.21934	0.199478	16.2661	19.7287	0.310798	0.12996	0.18126
JreChr02G11451	7.4915	8.57125	7.27416	1.93509	1.30172	2.66358	6.39569	3.82698	3.49289	2.39921	1.92117	1.85985	2.19924	2.7631	2.35817	6.16333	6.62067	5.93938	12.4108	6.00926	13.9696	13.4183	11.2256	15.8221	7.77897	1.96679	4.57185	2.06008	2.44017	6.24113	10.7965	13.4887	7.28397	8.73087	2.73055	1.25831	3.61215	9.8312	3.22325	8.20747	18.1335	2.87677	3.13612	5.75156	4.49465	3.48993	6.2358	2.38341	blue
JreChr02G11459	6.26051	4.81328	2.98836	0.07107	0.040798	0.624875	0.016498	0.003169	0.001683	0.002168	0.004957	0.001902	0.004121	0.003827	0.000724	0.002584	0.059625	0.001508	0.073918	0.00044	0.001891	0.001079	0.124275	0.203802	4.68738	0.245581	0.00711667	0.003009	0.00289067	0.021239	0.0254163	0.109719	0.014598	0.002305	0.013559	0.001892	1.90897	0.08152	0.00176133	0.0119233	0.00221133	0.0334597	0.138967	0.054192	0.00333567	0.0164867	5.66926	0.002942	turquoise
JreChr02G11460	16.2449	11.8696	16.3734	0.306435	0.303122	5.88322	5.20728	7.38234	12.9979	8.52346	11.5807	9.26086	10.5913	14.3843	12.4791	18.574	18.4726	9.71118	24.6531	33.6909	26.5677	0.365574	22.0224	17.1327	14.8293	2.16426	8.52918	9.78836	12.4849	15.5859	28.3039	13.1736	0.900337	8.78625	16.2473	9.39788	1.43626	0.590292	0.89866	3.12363	2.80926	0.280966	0.0695057	0.348286	0.469265	0.0153447	9.08511	12.5098	blue
JreChr02G11461	322.325	496.229	422.644	100.918	138.676	180.726	31.924	37.8357	33.2595	70.2151	52.1843	60.147	48.1431	50.6843	46.8207	126.327	73.7095	122.851	127.18	121.272	135.767	85.2919	84.7994	143.585	413.733	140.107	34.3397	60.8488	48.5494	107.629	128.073	104.559	202.491	62.8677	27.093	59.2832	266.797	80.1531	23.7681	27.773	19.4516	53.8447	42.8411	83.6771	35.5927	14.6767	454.258	35.3074	turquoise
JreChr02G11463	21.4196	19.464	17.5746	0.129315	0.234109	0.215665	1.32966	0.360613	0.096386	0.4435	0.590832	0.1692	0.219799	0	0.096331	3.05407	0.957232	0.908496	0.903489	1.00314	0.059832	0.191745	0.087034	0.218876	19.486	0.19303	0.595553	0.401177	0.105377	1.63993	0.655488	0.165885	0.358597	0.0294	0.227585	0.112074	0.151607	2.88773	4.9611	5.84468	0.207798	0	0	0.0290003	0.0700333	0.0756017	21.2508	1.20087	turquoise
JreChr02G11465	20.1514	18.5259	16.8114	5.91657	6.65462	7.67507	4.25179	3.43545	3.61386	2.81408	3.14066	2.44861	2.79034	1.80233	2.17328	2.15285	2.06135	2.11779	1.30954	1.59624	1.34301	0.007819	1.61793	0.007598	18.4962	6.74875	3.76704	2.80112	2.25532	2.11066	1.41627	0.544447	2.49945	2.70527	2.56851	6.03962	13.3974	7.68666	6.602	6.84666	2.21742	6.37562	6.4178	7.00327	6.42723	6.14158	16.2768	1.408	turquoise
JreChr02G11470	3.62154	3.75358	2.60906	0.012304	0.008342	0.009028	0.003413	0.006906	0.006259	0.018566	0.003045	0.007884	0.001981	0.00507	0.002472	0.002552	0.007983	0.011176	0.001358	0.009605	0.00084	0.001817	0.001975	0.001012	3.32806	0.00989133	0.005526	0.00983167	0.00317433	0.007237	0.00393433	0.00160133	0.000922	0.002828	0.012952	0.478208	1.84778	0.807189	0.424573	0.17062	0.11847	3.06652	3.60759	3.98009	3.27067	3.34959	3.05537	0.00950367	turquoise
JreChr02G11478	18.8618	25.5756	29.4946	19.1629	15.3854	25.9839	18.3927	15.3501	15.8228	4.01773	2.27232	3.20873	2.05388	2.20834	6.28925	4.50762	2.83017	6.38028	3.06476	3.28273	3.14811	2.3696	4.71458	9.88179	24.644	20.1774	16.5219	3.16626	3.51716	4.57269	3.1652	5.65532	5.38582	10.1864	3.49601	7.17646	22.0171	17.6459	18.0439	16.2586	15.3029	18.4638	18.3443	21.0995	16.3183	14.1614	28.4064	3.94767	turquoise
JreChr02G11489	25.6788	279.856	240.436	11.8924	117.984	37.4134	110.098	87.4878	103.808	45.0909	48.5188	40.5985	58.5145	67.1363	57.5604	68.2477	61.3636	67.0474	94.2365	77.3365	86.3328	100.205	122.694	115.62	181.99	55.7631	100.465	44.7361	61.0704	65.5529	85.9686	112.84	139.982	134.076	74.0484	85.5771	182.529	92.5715	59.3292	103.656	112.859	212.936	218.693	228.459	251.814	242.165	181.388	72.1454	turquoise
JreChr02G11491	24.9325	35.8982	29.6883	3.5464	5.08421	5.92746	2.39324	2.93668	2.36715	1.65703	1.61339	2.21853	1.50289	1.93971	2.11994	4.35211	1.59636	3.81478	3.13991	2.34727	3.47871	3.43977	3.48474	5.35525	30.173	4.85269	2.56569	1.82965	1.85418	3.25442	2.98863	4.09325	4.70292	1.90044	1.07533	2.08107	15.0962	5.20287	4.7141	5.05261	6.01767	15.6164	10.4829	10.654	8.84533	10.4002	22.2254	0.929034	turquoise
JreChr02G11492	54.885	57.9215	53.8474	43.626	45.7514	50.1192	17.5472	14.8859	10.0493	11.815	8.93272	11.2563	11.0559	9.74597	11.3734	6.11437	6.64764	6.23787	2.6934	3.99521	5.15196	2.25392	3.87222	4.10347	55.5513	46.4988	14.1608	10.668	10.7251	6.33329	3.94686	3.40987	6.91751	9.48528	11.6796	21.8677	53.2827	26.6807	25.1192	28.0919	41.0597	75.9933	39.9591	41.0343	62.0983	60.9097	47.7038	5.8401	turquoise
JreChr02G11494	7.63513	6.15616	7.65481	2.65542	1.54238	2.35305	3.0815	1.53671	2.39417	1.97014	1.82326	2.26147	2.1827	2.63611	2.85298	2.47911	1.72032	2.30852	2.96896	2.46856	2.8137	2.04834	1.84075	2.0131	7.1487	2.18362	2.33746	2.01829	2.55726	2.16932	2.75041	1.9674	0.687093	2.44512	4.39482	3.15128	5.88934	2.76839	5.34721	4.84908	3.56334	5.26828	2.63563	4.37023	4.14814	3.30675	6.82248	1.18416	turquoise
JreChr02G11497	40.394	47.151	30.5453	1.2926	17.7155	28.6796	34.8917	29.4534	29.0008	13.8634	17.2948	16.7145	21.7073	23.7791	20.4599	29.6816	22.8432	29.1444	34.6753	24.0222	30.392	40.7357	38.1733	58.0864	39.3634	15.8959	31.1153	15.9576	21.9821	27.2231	29.6965	45.6652	35.4227	38.5005	26.0824	19.6815	68.9422	78.5436	77.4074	81.0484	61.9556	85.2953	83.1085	82.1656	70.659	66.4191	36.9532	19.4616	brown
JreChr02G11502	9.65722	10.4774	9.31636	3.23696	4.29228	4.31022	3.30268	3.89858	3.88322	3.7385	2.48015	2.83804	2.18526	1.8222	1.30658	2.9874	3.39845	2.1457	3.8984	3.74756	3.58523	5.34592	4.54028	3.4408	9.817	3.94649	3.69483	3.0189	1.77135	2.84385	3.74373	4.44233	6.08178	3.52764	3.97405	3.49779	6.52543	5.41443	1.79128	1.53396	2.90802	5.39422	4.04954	3.6442	3.8115	4.64368	10.2727	3.46232	turquoise
JreChr02G11503	29.4397	16.091	13.9505	15.6203	8.24698	8.32664	12.1667	7.26408	12.7266	8.13744	8.67849	9.09657	8.16011	10.6212	7.7609	14.5179	12.0642	13.4212	26.7259	16.882	24.4421	35.0121	33.039	30.9784	19.8271	10.7313	10.7191	8.6375	8.84742	13.3344	22.6833	33.0098	30.7941	19.659	9.36048	7.58318	24.3349	13.8615	10.6197	13.416	22.5486	14.2186	15.1437	16.3928	13.0528	9.59994	24.3526	10.2146	blue
JreChr02G11512	9.80253	4.99178	2.41377	0.001566	0.0665	1.07303	0.001873	0.002192	0.020568	0.001655	0.078823	0.000541	0.004609	0.004078	0.000604	0.001137	0.000735	0.084416	0.016755	0.003837	0.021954	0.003794	0.001905	0.48752	5.73603	0.380364	0.008211	0.0270063	0.003097	0.0287627	0.014182	0.164406	0.001222	0.002295	0.020429	0.001643	0.939779	0.323369	0.00398333	0.003063	0.29335	0.305445	0.617893	0.420055	0.0446763	0.05403	3.52264	0.002524	turquoise
JreChr02G11518	0	0	0	0.334701	0.063917	0.163419	0.241928	0.478044	0.177044	0.527799	0.119855	0.069379	0.952741	0.710892	0.306805	4.89107	2.97945	5.93905	4.37123	1.93229	5.35882	15.7067	10.619	20.8244	0	0.187346	0.299005	0.239011	0.656813	4.60319	3.88745	15.7167	2.17473	1.93728	0.387188	0.242563	1.27305	0.065363	0.0588223	0.589569	1.96286	0.100939	0.0479253	0.0267797	0.153298	0	0.000972	0.400224	blue
JreChr02G11520	28.2503	26.0707	25.2068	6.07517	16.1661	9.56556	3.85639	4.59783	3.94688	0.458187	1.07158	0.588819	1.43861	2.86336	3.61105	10.3466	4.10307	10.8596	14.678	5.71766	10.7307	29.9226	15.7955	4.35667	26.5093	10.6023	4.1337	0.706195	2.63767	8.4364	10.3754	16.6916	14.9562	6.24655	4.40853	6.20355	24.4941	12.689	15.5011	15.6465	21.2485	16.3532	17.9526	20.3635	1.67231	7.32389	31.7071	2.47453	brown
JreChr02G11522	6.80843	5.17135	7.68437	5.57665	3.789	5.56436	5.12044	5.82568	3.34711	0.608626	1.0206	1.14222	0.253707	1.36287	1.15997	0.976597	1.95898	1.71684	1.60346	1.46231	2.82832	3.42362	2.31306	3.71509	6.55472	4.97667	4.76441	0.923816	0.925514	1.55081	1.9647	3.15059	1.09071	2.33797	2.3689	4.38999	5.76683	5.75763	4.84918	7.3557	4.32848	2.61785	3.39242	2.22654	2.92189	2.09735	6.25486	2.44656	turquoise
JreChr02G11532	1.8427	0.0806	1.99758	1.87823	0.118746	0.109276	1.34893	0.102408	0.115433	0.41296	0.166877	1.11577	0.174821	0.120453	0.147708	1.27497	1.32459	0.125413	2.99029	1.44309	2.8381	5.39486	3.75722	4.27139	1.30696	0.702084	0.522256	0.565204	0.147661	0.908325	2.42383	4.47449	0.0834	0.219933	0.183085	0.164318	0.870392	0.892695	0.808197	1.78248	1.4716	0.769595	2.19132	2.15125	2.41729	1.23163	2.19716	0.857816	blue
JreChr02G11536	135.792	112.48	92.4423	53.7696	62.5199	69.3797	56.4355	61.2786	60.2559	17.8308	25.4476	18.9216	36.0669	39.2259	35.8722	80.6995	51.3302	99.6009	36.479	27.2017	31.6522	35.6202	35.7735	47.9232	113.572	61.8897	59.3233	20.7334	37.055	77.2102	31.7776	39.7723	32.9263	53.5615	41.9235	50.8987	130.616	84.2475	46.5474	66.2763	54.4052	199.867	187.157	255.248	283.637	289.135	136.268	27.3337	turquoise
JreChr02G11542	91.5911	2.82818	90.6852	7.7176	15.8126	25.1538	9.32856	5.84707	9.19223	7.37062	7.73833	6.7549	6.71859	7.13779	7.662	31.3246	19.378	44.5268	53.6	34.3826	52.9091	72.9039	55.9515	82.7839	61.7015	16.228	8.12262	7.28795	7.17279	31.7431	46.9639	70.5464	92.8027	57.3665	7.05068	9.80335	42.976	26.5966	22.9221	43.8005	30.378	7.04285	9.50342	22.1221	20.293	23.4549	101.998	4.83217	brown
JreChr02G11543	1.0927	1.17715	2.32204	0.360831	1.10249	0.354558	1.05173	0.822216	2.01407	2.42182	1.70094	0.993397	2.457	1.60873	2.42208	10.1542	5.2946	6.83805	3.51768	5.70652	3.32761	1.74853	2.46322	3.08477	1.53063	0.60596	1.29601	1.70539	2.1626	7.42894	4.18394	2.43217	0.66567	4.64022	1.35404	1.03497	0.700073	1.30187	1.00722	2.78565	2.56844	0.264374	0.83701	1.21225	1.59921	0.647405	0.946824	2.79227	green
JreChr02G11547	6.53695	6.68787	4.48519	0.002686	0	0.012247	0.075676	0.002515	0	0.013426	0.059925	0.021499	0.001629	0.004627	0	0.001733	0.017766	0.026892	0.007667	0.00654	0.002622	0.006918	0	0.012492	5.90334	0.00497767	0.0260637	0.0316167	0.00208533	0.0154637	0.00560967	0.00647	0.240223	0.002116	0	0.001903	2.61944	7.50303	8.20986	5.67667	2.9635	0.156118	0.427509	1.60647	1.90669	2.33239	3.21112	0.00373567	turquoise
JreChr02G11549	48.0011	87.8676	85.3004	33.5936	24.8713	27.5709	27.2651	26.3229	9.60412	8.85353	14.1653	12.6937	11.8957	7.48672	8.2008	7.85213	4.76715	6.31634	3.33586	5.49647	2.43262	3.50885	1.99309	4.41228	73.723	28.6786	21.064	11.9042	9.19442	6.31187	3.75498	3.30474	6.58701	12.823	6.45841	20.7161	20.4347	42.7916	66.5239	104.266	190.257	10.7619	14.0586	13.5315	20.1126	23.8825	47.6044	4.47296	turquoise
JreChr02G11550	7.78296	7.74684	8.2857	3.77493	3.93931	5.15745	3.0832	3.5399	1.63595	3.36402	2.31372	2.05278	2.46089	1.52334	1.08924	1.02938	0.89454	0.733158	0.730322	1.32098	1.30151	0.814386	0.550574	1.41954	7.9385	4.29057	2.75301	2.57684	1.69115	0.885694	1.1176	0.928167	1.05074	2.86765	1.54976	2.51764	7.1673	13.303	25.2247	38.5691	44.5367	1.49767	2.91258	5.03823	7.29096	12.3653	5.87733	0.681711	turquoise
JreChr02G11555	1.77019	27.1091	0.200401	0.155188	0.521575	0.73503	0.584557	0.179639	0.208264	22.832	21.7146	4.93255	0.672715	0.13218	26.5206	0.120935	0.166515	0.149714	0.182257	5.23226	19.3734	17.9283	16.6362	25.1877	9.69324	0.470598	0.324153	16.493	9.1085	0.145721	8.26265	19.9174	17.5471	30.9921	0.162804	0.528958	0.330957	16.3267	7.35202	2.5594	12.7401	1.94893	0.14057	0.1542	0.125344	0.139028	0.684804	0.184365	blue
JreChr02G11574	54.3534	51.7049	47.8666	16.2819	17.8053	22.7683	19.7999	12.5747	14.6613	9.56034	10.7517	10.0623	10.0819	11.9255	11.6968	17.9203	14.3381	17.4674	22.706	17.9762	28.7541	31.7052	20.4007	32.1778	51.3083	18.9518	15.6786	10.1248	11.2347	16.5753	23.1454	28.0946	22.6644	28.0667	14.8745	16.19	35.351	30.1106	30.9753	32.6205	32.8424	37.9714	34.2863	34.9376	36.2009	37.9	57.1214	11.6955	turquoise
JreChr02G11579	34.4323	32.0357	39.3808	26.5698	24.5268	28.9203	18.4446	16.9174	17.3405	5.09877	5.60694	4.60465	6.33872	5.59802	4.17974	4.60579	7.53624	6.47874	1.71226	1.69382	1.11601	0.014701	0.667903	0.781015	35.283	26.6723	17.5675	5.10345	5.37216	6.20692	1.50736	0.487873	3.19703	6.8556	6.11466	19.6514	51.2357	13.5089	0.28532	0.659959	0.119847	2.89933	2.76417	6.38136	1.92306	0.17228	44.0394	5.05943	turquoise
JreChr02G11580	9.12077	1.75463	1.52392	0.971929	1.45576	1.2846	0.967552	0.829696	7.53071	1.65216	7.33166	10.2803	6.06485	9.49294	4.9173	10.782	11.097	7.7388	8.99793	1.92863	5.34627	14.3827	10.8196	5.07643	4.13311	1.23743	3.10932	6.42137	6.82503	9.87258	5.42428	10.0929	1.98007	11.4972	1.73958	9.30441	8.52203	5.63787	6.7854	4.06146	6.0477	7.80215	9.12639	8.08169	8.32732	8.3949	4.38942	8.47573	blue
JreChr02G11586	11.9762	14.176	9.82617	5.09115	9.98248	8.27717	4.35469	3.52927	5.53059	2.59867	3.28455	2.71396	4.05436	2.81358	5.96025	5.49317	2.54339	4.8179	5.06744	3.04911	2.86673	3.34517	4.31859	4.45912	11.9928	7.7836	4.47151	2.86573	4.27606	4.28482	3.6611	4.04096	0.111708	2.83856	2.92877	9.1834	14.9508	7.43834	3.86292	2.3353	1.67139	11.8603	12.4767	11.9037	9.03424	7.5913	10.7207	4.50209	turquoise
JreChr02G11591	46.8726	47.331	40.88	20.7698	24.0916	28.9908	16.8213	14.388	11.7102	18.3698	16.7142	18.3819	15.5271	15.1731	15.1862	12.759	10.1131	13.6574	14.9332	19.9085	20.5004	12.9404	15.1709	18.1934	45.0279	24.6174	14.3065	17.8219	15.2954	12.1765	18.4474	15.4349	21.3715	28.4137	21.4261	13.4572	28.9693	28.4408	28.0358	23.7286	21.8427	15.0039	16.327	19.7355	21.829	21.2132	48.3817	15.8549	turquoise
JreChr02G11592	14.0186	10.0456	14.1926	3.99827	5.18168	6.73488	4.65631	4.45084	3.30976	2.80413	2.96243	2.66265	1.86823	2.31967	2.66217	3.90605	3.36554	3.84227	2.76271	4.13385	2.33397	3.65741	4.97517	5.70357	12.7522	5.30494	4.13897	2.80974	2.28336	3.70462	3.07685	4.77872	2.65851	3.60126	2.94623	4.0979	13.2933	8.20561	8.72137	9.31154	10.125	13.0249	14.4352	14.4492	13.0711	13.0716	10.8887	3.94112	turquoise
[truncated: 5,911 more rows]
[truncated: 3 more columns]
